# Supplementary material for: Characterization of Changes in Gene Expression and Biochemical Pathways at Low Levels of Benzene Exposure
Source: PubMed Central journal article supplement (PMC4006721; doi:10.1371/journal.pone.0091828), 2014-05-01

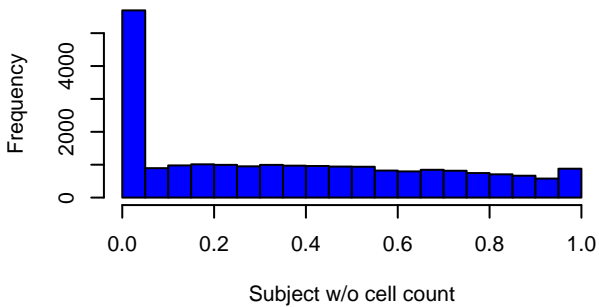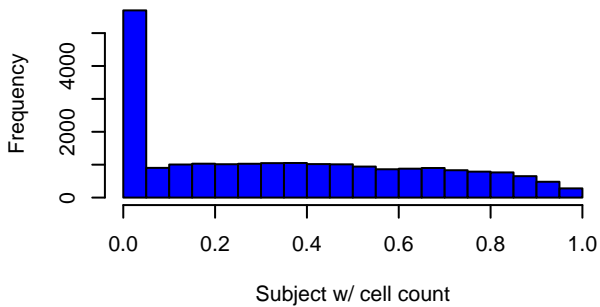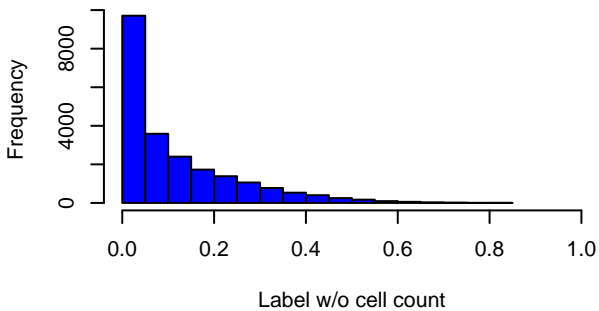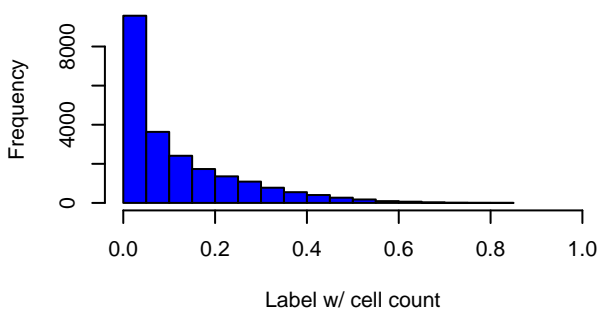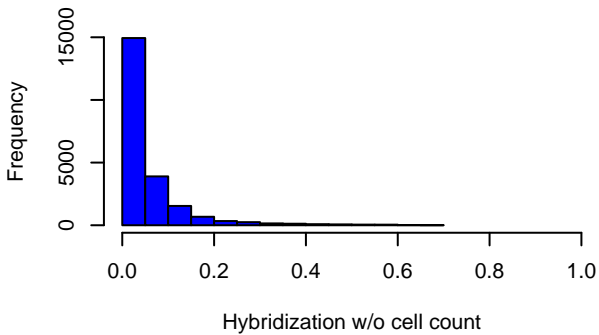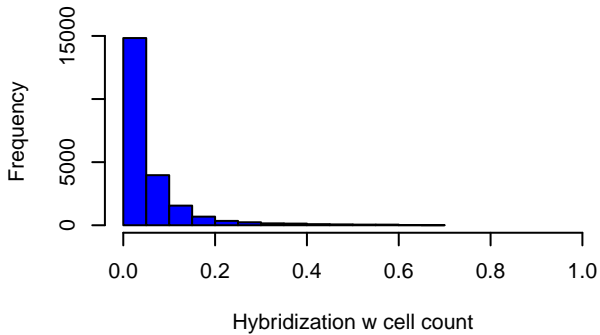

Supplement: pone.0091828.s001.pdf [file pone.0091828.s001.pdf]
