# Supplementary material for: Characterization of Changes in Gene Expression and Biochemical Pathways at Low Levels of Benzene Exposure
Source: PubMed Central journal article supplement (PMC4006721; doi:10.1371/journal.pone.0091828), 2014-05-01

**Figure S3(a-d): Pathways-Clusters of probes/genes**

a. B-cell receptor signaling pathway

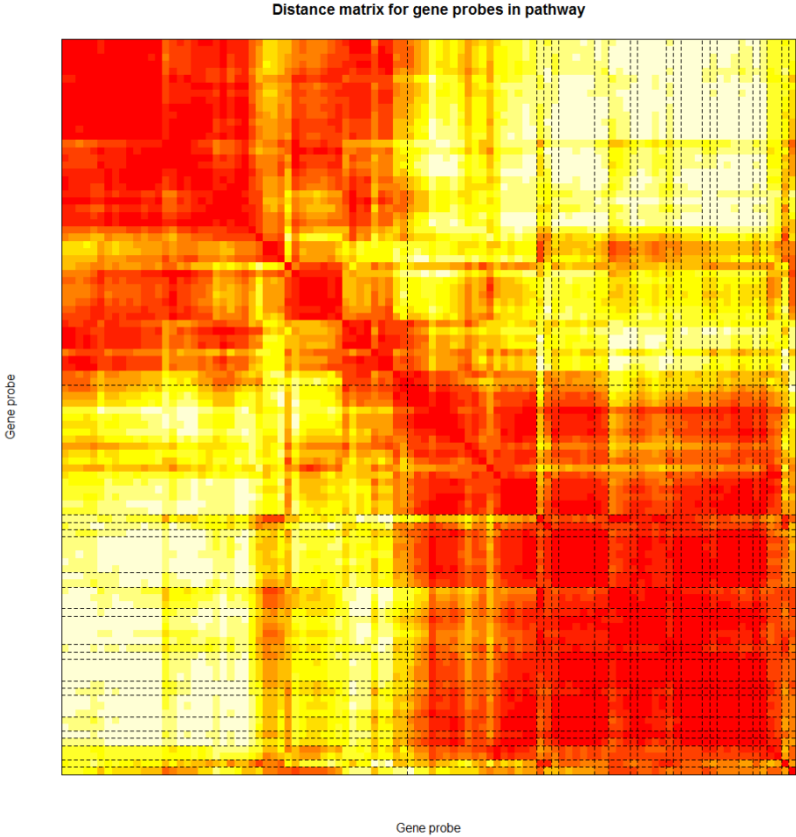

b. Toll-like receptor signaling pathway

Distance matrix for gene probes in pathway

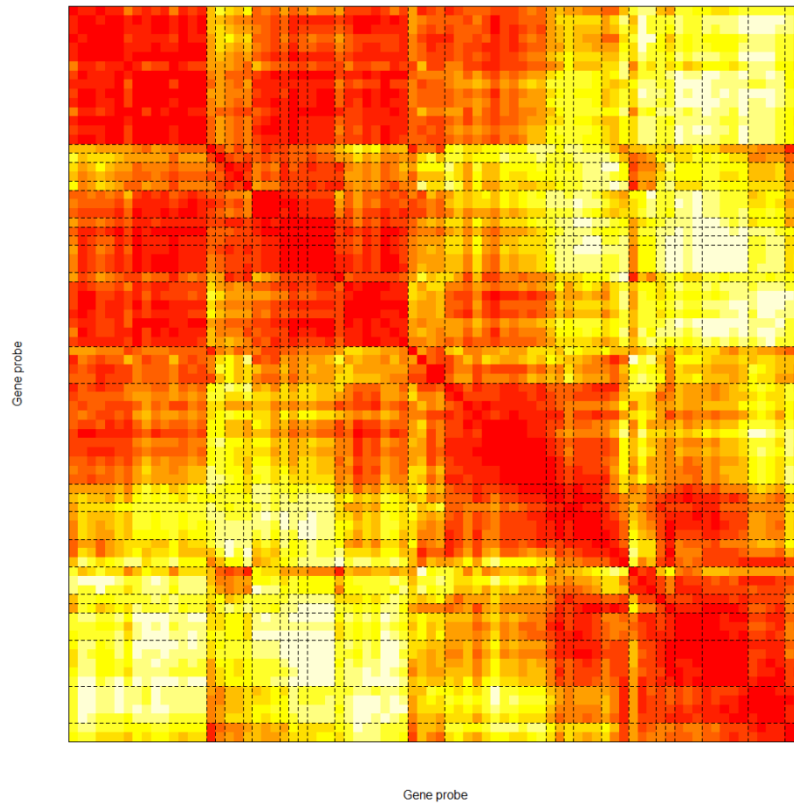

c. Steroid hormone biosynthesis pathway

Distance matrix for gene probes in pathway

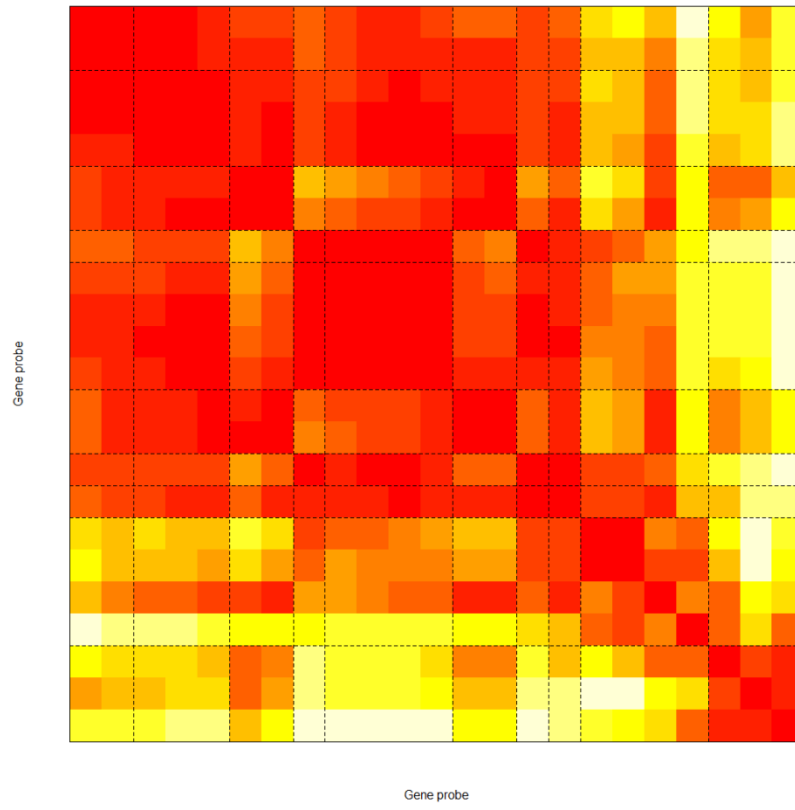

d. Maturity onset of diabetes pathway

Distance matrix for gene probes in pathway

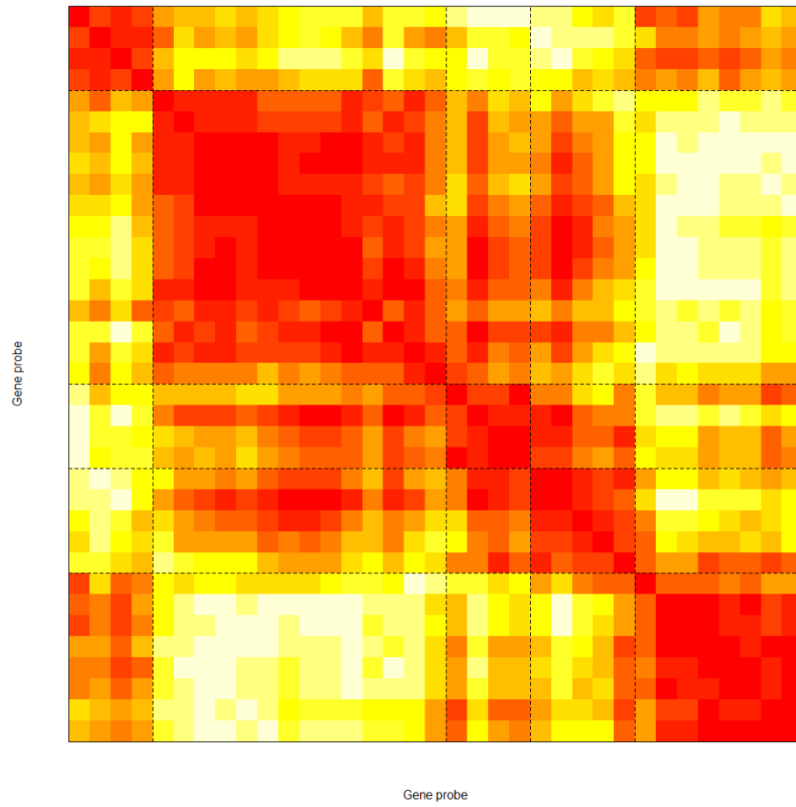

Supplement: pone.0091828.s003.pdf [file pone.0091828.s003.pdf]
