# Supplementary material for: Characterization of Changes in Gene Expression and Biochemical Pathways at Low Levels of Benzene Exposure
Source: PLOS journal article supplement (doi:10.1371/journal.pone.0091828), 2014-05-01

Figure S2(a-d): Pathways- Principal Components-based response

a. B-cell receptor signaling pathway

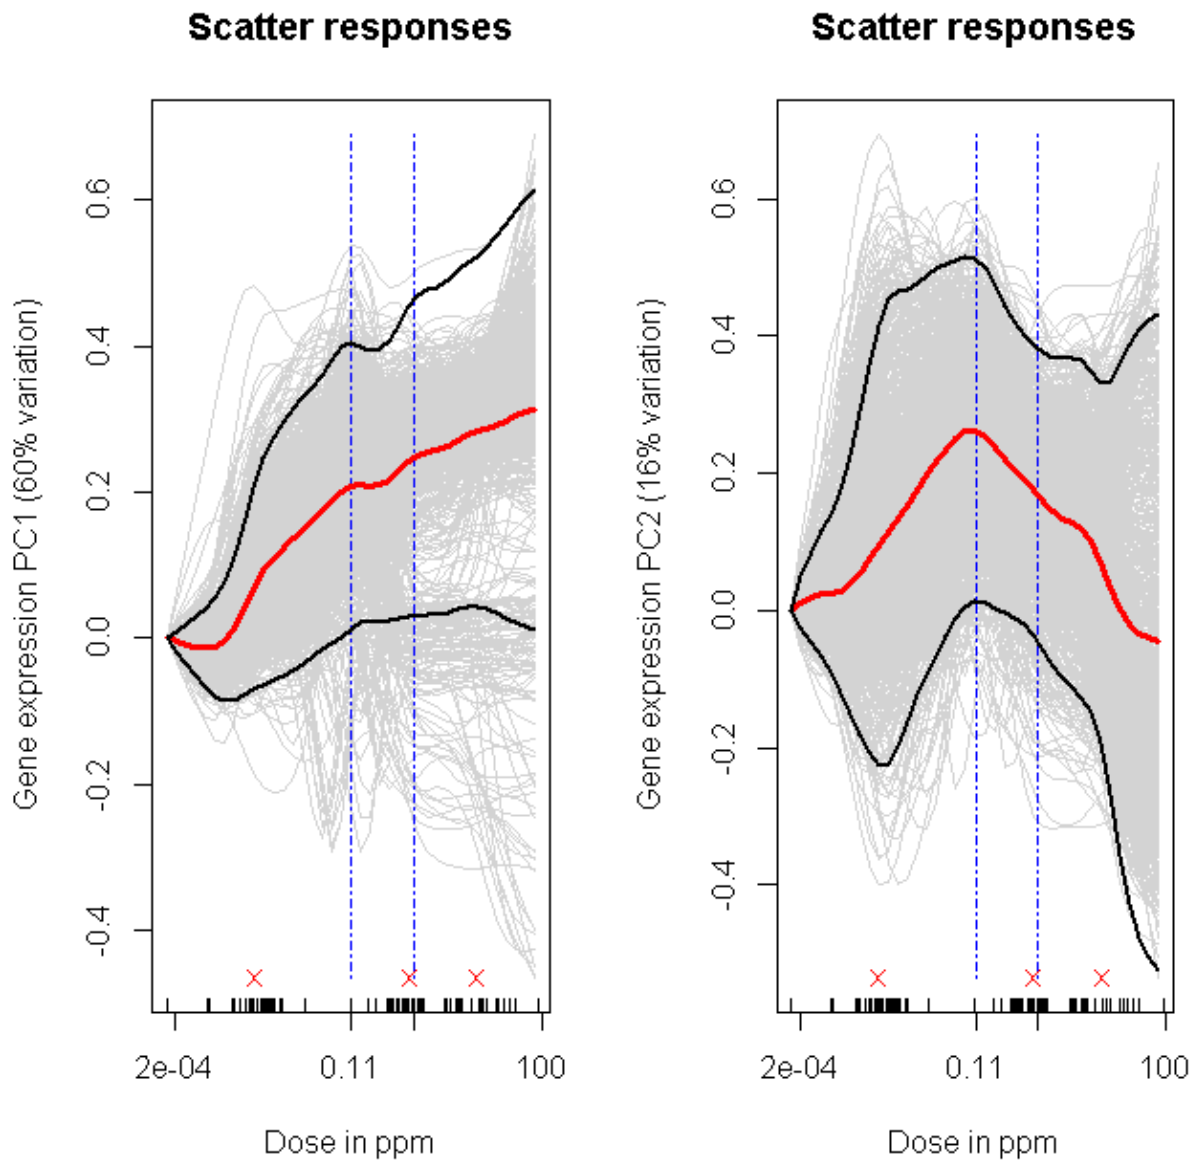

b. Toll-like receptor signaling pathway

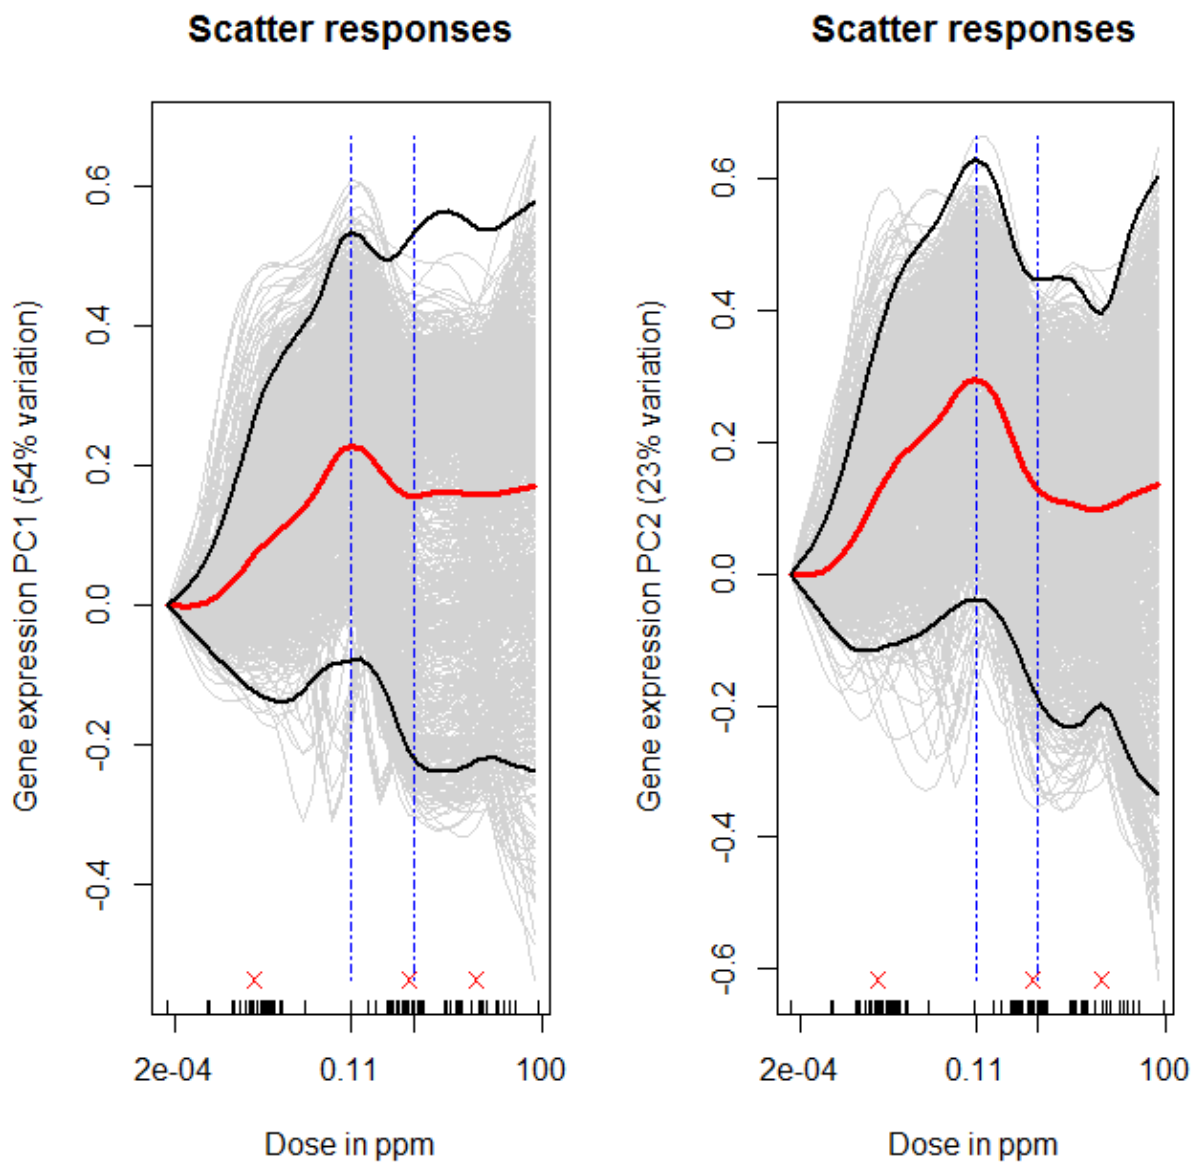

c. Steroid hormone biosynthesis pathway

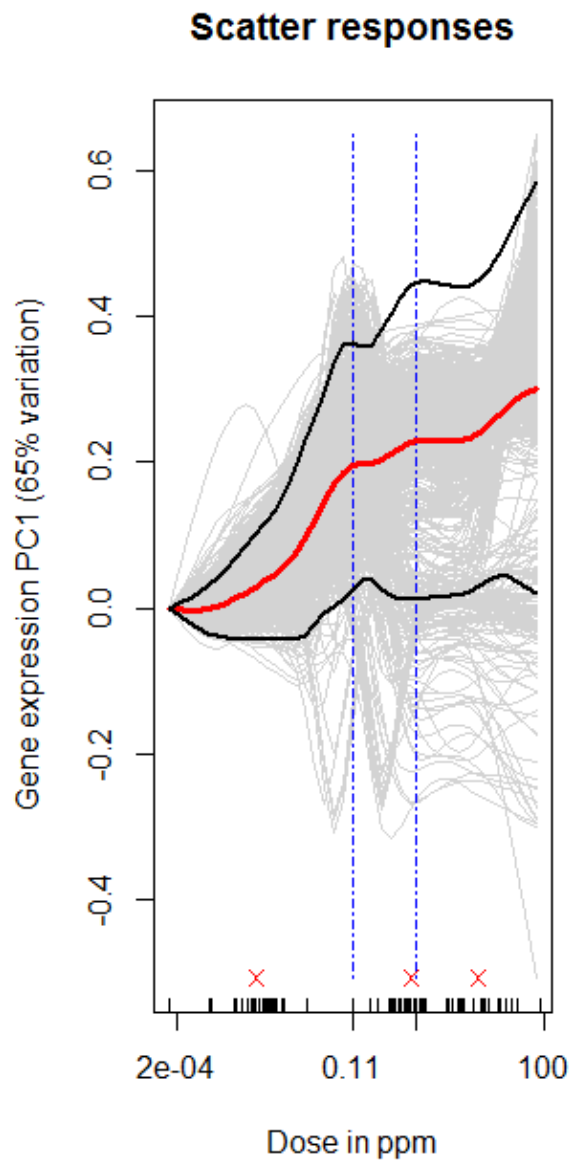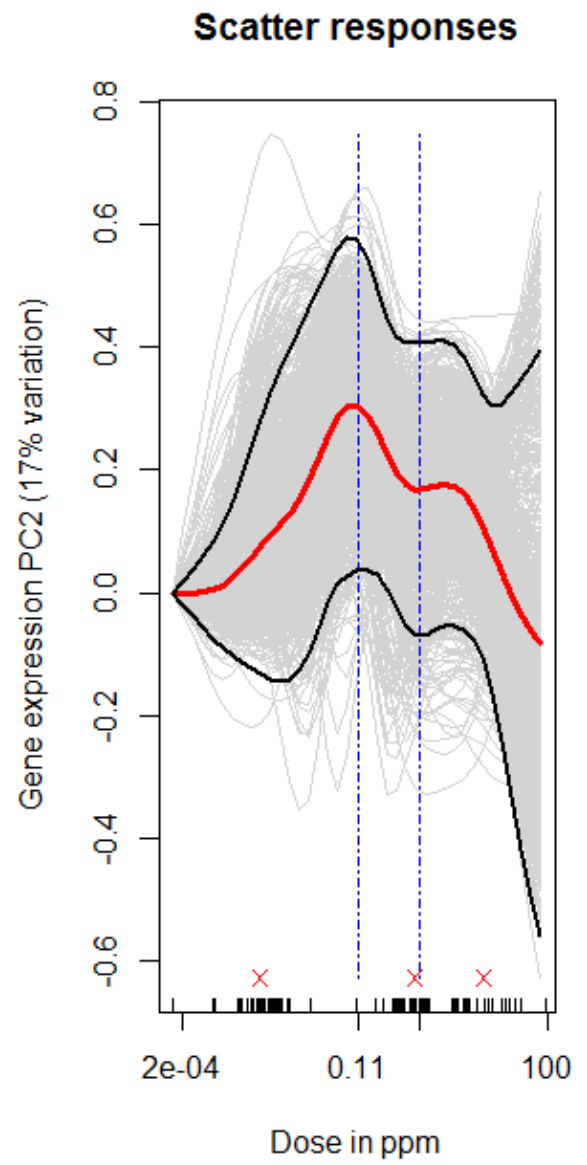

d. Maturity onset of diabetes pathway

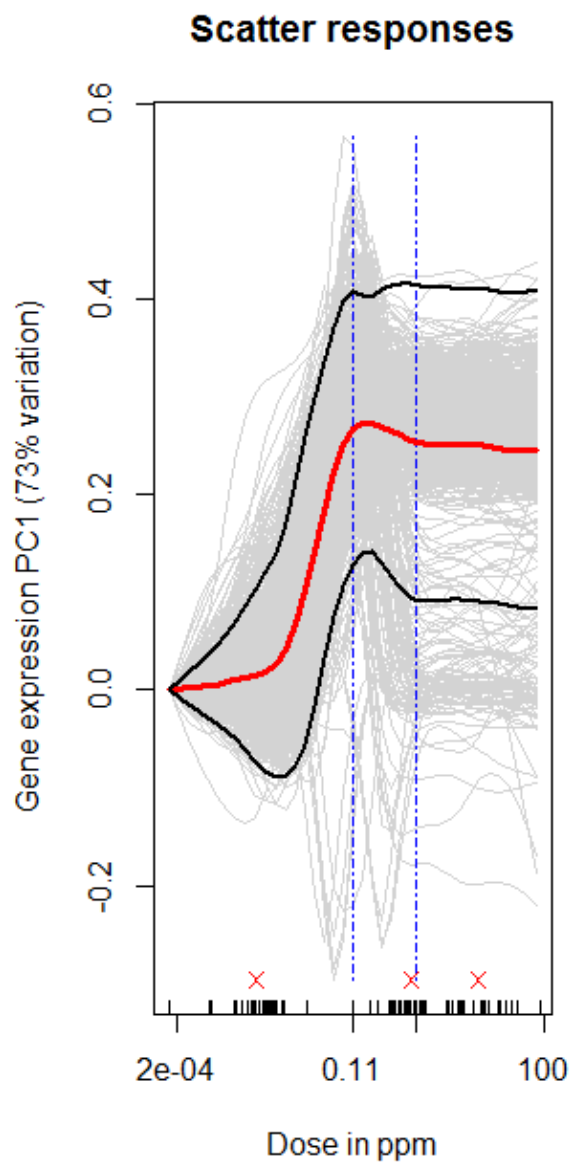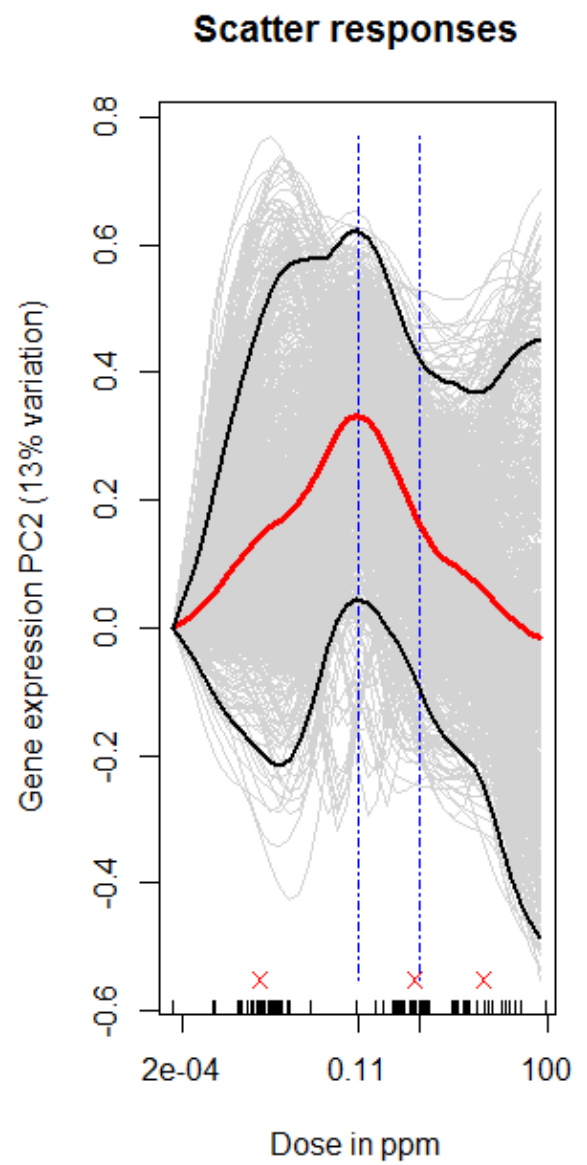

Supplement: S2 (10.1371/journal.pone.0091828.s002) [file journal.pone.0091828.s002]
