# Supplementary material for: Characterization of Changes in Gene Expression and Biochemical Pathways at Low Levels of Benzene Exposure
Source: PLoS One. 2014 May 1;9(5):e91828. doi: 10.1371/journal.pone.0091828 (PMC4006721; doi:10.1371/journal.pone.0091828)
Supplement: Table S2 — Fixed effects estimates for the mixed model in Equation (1 ). (XLSX) [file pone.0091828.s005.xlsx]

## Sheet: UpdatedMixedModelResults2013
Sno	Probe Id	Gene Name	b_<<1ppmvsControl	pvalue_<<1ppmvsControl	b_<1ppmvsControl	pvalue_<1ppmvsControl	b_<5-10ppmvsControl	pvalue_<5-10ppmvsControl	b_>10ppmvsControl	pvalue_>10ppmvsControl	b_monocytes	pvalue_monocytes	b_acd3_cd4	pvalue_acd3_cd4	b_acd3_cd8	pvalue_acd3_cd8	b_acd3_cd19	pvalue_acd3_cd19	b_cd16_56	pvalue_cd16_56	b_age	pvalue_age	b_sex	pvalue_sex	b_smoking	pvalue_smoking
1	6960451	THBS3	0.0518774	0.159846	0.0326752	0.377343	0.121361	0.0189901	0.0924759	0.0712655	0.000192858	0.370628	0.000142534	0.133451	-0.000106342	0.227927	-0.000100186	0.626684	-3.51161e-05	0.521122	-0.00134038	0.475302	0.0392595	0.336704	-0.0362172	0.389755
2	2600731	SLC38A2	-0.0439595	0.47909	0.0207904	0.740482	-0.0374093	0.674084	0.00377003	0.96526	-0.000749752	0.0387325	-0.000202337	0.205429	0.000216948	0.148049	0.000347701	0.317006	0.000199175	0.0310701	-0.00494496	0.118273	0.0910828	0.187211	0.0323062	0.647566
3	2120309	XG	-0.00887059	0.80269	-0.0299448	0.390087	0.0414464	0.389609	-0.0683071	0.160238	0.000134286	0.514108	-2.72653e-05	0.765511	-5.49228e-06	0.94698	9.82367e-05	0.619337	-0.000101946	0.0494825	0.00115135	0.515225	0.00190024	0.961009	-0.0419224	0.291404
4	7510608	DDR1	0.0112462	0.707694	0.0371461	0.203166	-0.0203459	0.608784	0.0424211	0.301791	-2.48257e-05	0.886673	3.11697e-05	0.687014	-0.000125646	0.0640541	0.000195576	0.2408	-4.83623e-05	0.265066	-0.00357441	0.0161247	0.0748747	0.0220952	-0.000696524	0.983426
5	1570494	CCNB1	0.0282787	0.352571	0.0075233	0.800366	-0.00555093	0.891423	-0.0201561	0.628745	0.000126109	0.475473	-8.60107e-05	0.272448	4.91944e-05	0.48314	-2.94622e-05	0.861732	4.48488e-05	0.311701	-0.000897053	0.553741	0.0426872	0.198397	0.0147999	0.664694
6	6520451	ZNF496	-0.011714	0.744356	0.00950391	0.787593	0.0500276	0.300696	0.0111986	0.820698	-5.04237e-05	0.809358	-3.65496e-05	0.693025	7.91433e-06	0.9238	4.4898e-05	0.822236	6.74743e-05	0.197952	0.00142026	0.428621	0.00683438	0.862019	0.00244654	0.951701
7	5960017	CRYM	0.0120495	0.667997	-0.00887454	0.748261	0.0184022	0.633148	0.00152994	0.968244	0.000139651	0.390582	1.63947e-05	0.820485	8.28719e-05	0.212752	-0.000411777	0.00859373	-1.18147e-05	0.774716	0.000323326	0.817764	0.0444479	0.148945	-0.0045327	0.885432
8	2900356	SCIN	0.0253031	0.382785	0.0560232	0.0449814	-0.000205573	0.995717	-0.000956363	0.980577	9.69626e-05	0.561316	-6.69275e-05	0.370269	4.44667e-05	0.497744	5.67604e-05	0.724888	-5.8163e-05	0.163518	0.00300276	0.0345609	-0.0198595	0.528458	0.029676	0.355343
9	5130504	APOH	-0.0080748	0.766418	-0.0240566	0.357005	-0.0745305	0.0377274	-0.0556898	0.128913	0.000165352	0.29059	-7.99195e-05	0.252672	-3.50644e-05	0.575462	-3.55151e-05	0.81419	1.7841e-05	0.650487	-0.00200043	0.13294	0.0205056	0.485786	0.00650363	0.82898
10	5130373	SMAD7	0.0732075	0.657879	0.578513	0.00052458	0.251477	0.290688	0.298627	0.193566	-0.00271601	0.00476487	-0.00013653	0.748928	0.00101423	0.0104422	0.00024627	0.790164	0.000666437	0.00655776	0.015401	0.0661256	-0.191036	0.299177	0.333308	0.0722452
11	510435	SLC7A2	0.0276831	0.360916	0.0512782	0.0797381	0.0306912	0.445564	0.0289139	0.481325	8.21865e-05	0.637755	-2.34073e-06	0.976061	1.97045e-05	0.77604	-0.000148987	0.376857	-6.73491e-05	0.124269	-0.000998498	0.50219	0.0440566	0.180987	0.00663086	0.843518
12	4900110	LALBA	0.0208399	0.43843	0.0256185	0.337945	0.0461081	0.213611	0.0989128	0.00802065	-0.000458079	0.00351979	0.000136452	0.0490089	3.66946e-05	0.557595	0.000322989	0.031085	-7.10465e-05	0.0723289	-0.00199186	0.142105	-0.0540513	0.0686562	0.0406342	0.181441
13	160528	KIR2DL5A	-0.0220391	0.71064	-0.0921975	0.122416	-0.000410353	0.996148	-0.0288681	0.725344	-0.00012136	0.72521	-0.000122404	0.423835	0.000133679	0.3508	-0.000492878	0.138419	0.000255517	0.00371617	0.0011555	0.700591	-0.00917311	0.889359	0.038399	0.565123
14	3780411	KIR2DL5A	-0.00779882	0.947771	-0.0624773	0.603157	-0.0587075	0.731211	0.0345878	0.834972	-0.00100375	0.14869	-0.00087443	0.00440836	0.000612994	0.0305773	-0.000731804	0.27151	0.000899688	3.51418e-07	0.00760835	0.209087	-0.0130212	0.921736	-0.0319969	0.811348
15	4150039	DIO3	-0.0534708	0.108232	-0.0387918	0.232556	0.0028853	0.947931	-0.0302894	0.505824	-0.000153979	0.425845	0.000109197	0.202851	2.61751e-05	0.734316	-8.41199e-05	0.649267	3.3387e-05	0.491648	0.00162312	0.327452	-0.00335042	0.926253	-0.00348524	0.925777
16	3780379	K6IRS4	0.137873	0.0247062	0.154713	0.0116373	0.157147	0.0696537	0.0658243	0.437665	-8.47624e-05	0.811993	0.000151801	0.337722	-4.16552e-05	0.774265	0.000187723	0.584283	1.72438e-05	0.848863	0.00331153	0.283852	-0.0576708	0.39626	-0.0185627	0.786841
17	1030215	TRPC1	0.0751356	0.12545	0.0612595	0.214862	0.0490527	0.483073	-0.0593501	0.384393	0.000261807	0.359988	0.000306921	0.0150595	-0.000104187	0.37527	4.94393e-05	0.856855	-0.000161386	0.0266226	0.00275507	0.26914	-0.009794	0.857333	0.0097159	0.861003
18	1340121	LIG3	0.18665	4.16058e-06	0.0610974	0.134022	0.115269	0.0451939	0.157098	0.00548256	-0.000152335	0.520243	-5.27962e-05	0.613462	5.85581e-05	0.54057	-0.000310539	0.170009	0.000147665	0.0139258	-0.000761114	0.71191	0.0233079	0.605038	0.0777832	0.0893984
19	3890692	GHSR	-0.00340393	0.906094	-0.0460102	0.106618	-0.0327182	0.408118	-0.0167435	0.673318	-0.000103214	0.53817	-4.49416e-05	0.545251	0.000100313	0.138298	5.68374e-05	0.723754	6.9752e-05	0.0997801	-0.000741117	0.608639	-0.0551718	0.0817771	0.0270588	0.404468
20	3390370	HSD11B1	0.0135144	0.659419	-0.0206186	0.484566	-0.0164159	0.685106	-0.0547203	0.186631	0.000230323	0.191977	-0.000205258	0.00926684	0.000159054	0.0234565	5.68616e-05	0.738776	-9.14665e-05	0.0390773	0.00313333	0.0369867	-0.0567363	0.0877881	0.0535548	0.114854
21	5130369	FLJ32784	-0.0152225	0.618643	0.0311254	0.305629	0.0950584	0.0248907	0.0838183	0.0467577	-8.0603e-05	0.650226	1.8011e-05	0.818944	-0.000117847	0.105055	0.000121047	0.478035	-5.45149e-05	0.227159	-0.000121953	0.936924	-0.0379605	0.259619	0.0433846	0.208843
22	1450309	RNASE2	-0.372732	0.00456668	-0.221261	0.095477	-0.135782	0.472666	-0.14127	0.439889	0.00130442	0.0885757	-0.000475771	0.160359	-0.000587152	0.0623551	0.000381454	0.604039	-0.000332585	0.0881159	-0.0113162	0.0898829	0.0785298	0.591329	-0.237184	0.108622
23	3840411	MTHFD1	0.0283486	0.405868	-0.0238132	0.483778	0.0341585	0.4708	-0.0120698	0.798748	0.000308606	0.120988	-3.284e-05	0.708583	-6.97998e-05	0.383081	-0.00011022	0.562063	-8.01472e-05	0.110974	-0.00161729	0.348482	-0.0381273	0.311834	-0.00749122	0.846174
24	5890440	LOC149134	0.024276	0.477075	-0.0605641	0.0689246	-0.0131565	0.771417	-0.0483488	0.302284	0.000111393	0.574928	-7.17986e-06	0.935034	3.20289e-06	0.966922	-0.000241197	0.203732	-7.8321e-05	0.113188	0.000211851	0.900524	-0.00688968	0.853359	-0.0537307	0.160165
25	3120674	NALP7	0.0036538	0.906439	0.00356963	0.905412	-0.000759604	0.985258	0.00322753	0.939001	-7.79035e-07	0.996538	6.32347e-05	0.429247	-6.49538e-05	0.363205	-0.000131916	0.44525	-1.00495e-05	0.82358	0.000987288	0.518937	0.000267257	0.993677	-0.0199526	0.563937
26	1940131	P2RY5	-0.125891	0.0702503	-0.195649	0.00511859	-0.121316	0.223054	-0.210496	0.028641	0.000471831	0.243064	-0.000172755	0.334846	-0.000221396	0.187429	-0.00035362	0.363932	6.30672e-05	0.54085	0.000664332	0.850224	0.0104696	0.892115	-0.0491464	0.5296
27	1980064	GUCY2F	0.0472901	0.0931703	0.0103303	0.705944	0.0796085	0.032943	0.0105944	0.782587	-6.0036e-05	0.713051	-6.36146e-05	0.380351	6.10901e-05	0.347705	-0.000207286	0.185404	-5.7779e-06	0.887898	-0.00198661	0.154709	0.019103	0.532337	-0.0279206	0.375623
28	4640360	PNLIPRP1	0.0106202	0.721326	0.018493	0.521143	0.0383091	0.330863	0.0101939	0.801156	-0.000163857	0.341235	3.04103e-05	0.691568	4.71671e-05	0.489603	0.000261897	0.113567	1.17121e-05	0.78614	0.000692423	0.637251	-0.0309977	0.33767	0.0655813	0.0479787
29	6770646	COMMD9	-0.0890425	0.0252781	-0.115499	0.00400464	-0.0545581	0.337815	-0.0973197	0.0793895	0.000239807	0.302003	-6.17432e-05	0.547173	-0.000182315	0.0549165	-0.000216277	0.330891	-4.47694e-05	0.44849	-0.00200973	0.320978	-0.0456985	0.30195	-0.0492325	0.273439
30	510504	DDX43	0.0780462	0.119885	0.11183	0.0255088	0.0502533	0.475734	0.143272	0.0390607	-0.00044646	0.125785	-1.27164e-05	0.921744	0.000114531	0.33138	0.000320477	0.25282	3.9561e-06	0.957299	0.00177041	0.483338	-0.152343	0.00609254	0.00963172	0.863836
31	130059	PCBP4	-0.00243148	0.937039	-0.0241835	0.430938	-0.0252749	0.558271	-0.0183884	0.665771	0.000268286	0.133895	-0.000104772	0.186508	7.14097e-05	0.32657	-5.46084e-05	0.750698	2.313e-05	0.610502	-6.42227e-05	0.966994	0.0523857	0.123837	-0.00847999	0.80625
32	1430609	NETO1	0.00101419	0.974337	-0.0503989	0.0972058	0.0119342	0.774452	-0.0112891	0.791563	8.56863e-05	0.636883	1.82862e-05	0.821887	-1.64742e-05	0.817309	2.63602e-05	0.880527	-3.3394e-05	0.461937	0.000130824	0.932519	-0.0272778	0.425909	0.0410364	0.239857
33	6100475	NETO1	-0.0331181	0.306067	0.00556368	0.862133	-0.00197574	0.964847	-0.0202865	0.648705	0.000309	0.0994301	-7.75773e-06	0.925929	4.98262e-05	0.509292	-3.52771e-06	0.984415	-4.24443e-05	0.3707	0.00100979	0.532631	-0.000386983	0.991344	-0.00229516	0.949327
34	6350386	CCDC51	-0.0242509	0.458323	-0.0353718	0.27765	-0.0672382	0.141984	-0.0276841	0.539226	-0.000137625	0.46875	-0.000221179	0.00856178	6.23611e-05	0.425264	-0.000224696	0.218654	0.000156102	0.00124384	0.0016118	0.328399	-0.0152819	0.671992	-0.0376393	0.306978
35	2030736	CENTD1	0.11132	0.00386636	0.120371	0.00157696	0.117058	0.0254887	0.170844	0.00131474	-0.00044494	0.0475119	-4.81606e-05	0.627607	0.000223694	0.012783	0.00022685	0.290252	0.00014932	0.00826562	0.00508607	0.00866031	-0.0675068	0.110565	0.039817	0.360849
36	3170209	CENTD1	0.0379236	0.23413	0.0176465	0.575731	-0.0361272	0.407481	0.00757501	0.863161	-0.000265932	0.151654	3.04338e-05	0.710835	-1.67576e-05	0.822337	0.00014617	0.410388	-5.16831e-05	0.269673	-0.00258703	0.106306	0.0281527	0.421548	-0.00269176	0.940324
37	2900440	ITSN1	0.0162509	0.79045	-0.103109	0.094214	-0.0861409	0.326371	-0.0355062	0.67556	0.000794036	0.025662	-9.33246e-05	0.553632	-0.000364186	0.0134739	-0.00115992	0.000706153	-3.07888e-05	0.734446	-0.0119393	0.000117167	-0.00440226	0.948357	-0.0592637	0.389287
38	6860382	ITSN1	-0.0143635	0.677546	-0.00220735	0.947761	0.032291	0.486322	-0.0232931	0.621177	0.000168538	0.399262	-0.000198862	0.0253282	5.93826e-05	0.457903	-6.52871e-06	0.972911	-1.97948e-05	0.694124	-7.4387e-05	0.965367	0.0423259	0.261278	0.00562362	0.884067
39	3850669	LXN	0.0478948	0.412532	-0.0636388	0.280841	-0.0221489	0.792291	-0.0183834	0.82106	0.000549408	0.106651	-0.00014792	0.326081	-0.000108651	0.439624	-4.71231e-06	0.988515	-3.30083e-05	0.703612	-0.00239621	0.419046	0.0485187	0.455517	-0.069693	0.289853
40	580201	DTX3	-0.0224065	0.635474	0.0645617	0.174086	-0.0446218	0.504952	0.112792	0.0855715	-0.000173488	0.528847	8.29931e-05	0.494879	0.000100638	0.376356	-0.00054097	0.040574	1.28587e-05	0.854654	0.00368659	0.124851	-0.136609	0.00912964	0.0628479	0.241844
41	3290286	SELM	-0.0396314	0.485029	0.000889232	0.987628	-0.0302418	0.710677	-0.030736	0.697331	0.000572854	0.08362	0.000395675	0.00677299	-3.51016e-05	0.797605	-0.000343156	0.280174	-0.000112227	0.183306	0.00309633	0.283268	0.118961	0.0594613	-0.0228924	0.721596
42	3440053	RFXDC1	-0.0151663	0.613138	0.00720249	0.803674	-0.0579818	0.146524	-0.0211748	0.601913	-0.000254893	0.14025	3.34475e-05	0.664521	3.02281e-05	0.663174	-0.000138717	0.405902	-1.67118e-05	0.701253	-0.00132562	0.368705	0.0348234	0.284949	0.0144055	0.665126
43	1570204	C1orf60	-0.0715786	0.382782	-0.12612	0.127156	-0.174815	0.137204	-0.225664	0.0476389	0.000557162	0.243421	0.000263243	0.212683	-0.000520943	0.00831799	-0.000222213	0.628299	-0.000111193	0.361136	-0.00301977	0.468096	0.0925632	0.309924	0.016997	0.854168
44	3710047	TGOLN2	-0.0479493	0.109811	-0.00309854	0.917825	-0.0176862	0.674909	-0.0887069	0.0329635	0.000239954	0.169752	-6.38673e-05	0.407979	-3.03111e-05	0.671589	-4.38175e-05	0.793533	-4.53654e-05	0.307034	-0.0026878	0.0771286	0.055431	0.0949929	-0.0339964	0.316996
45	3930360	ALG14	0.00929987	0.825336	-0.0155648	0.710354	-0.0463101	0.428273	0.0191402	0.742661	0.000270344	0.270532	-0.000262001	0.0157982	0.000186622	0.0594343	0.000456584	0.0520221	-5.88811e-05	0.342747	0.00100427	0.636366	-0.0461306	0.32122	-0.030477	0.521081
46	5290132	SEZ6L2	0.00819806	0.785381	-0.000228647	0.993837	-0.00718097	0.860104	-0.0402429	0.331876	0.000199372	0.254888	-1.65386e-05	0.831303	-3.55844e-05	0.606042	-4.6344e-05	0.782121	-5.53459e-05	0.207224	-0.0021578	0.151078	0.00149451	0.963922	0.00868825	0.796878
47	6290400	SEZ6L2	-0.0166306	0.577272	0.0174539	0.559154	0.0602958	0.150006	0.0209478	0.612627	-6.83707e-05	0.694198	8.04029e-05	0.295013	-5.67915e-05	0.425854	-0.00014067	0.398419	-2.92768e-05	0.507893	-0.00065399	0.665747	-0.00939944	0.775879	0.0750029	0.0268346
48	6280059	PRCC	0.00771597	0.806112	0.0794952	0.0119729	0.0199409	0.654385	0.0898716	0.0396675	-9.59723e-05	0.600701	-2.69842e-05	0.738599	2.1334e-05	0.77818	5.84486e-05	0.739361	3.43601e-05	0.462052	0.00198141	0.215673	-0.00623616	0.858064	-0.023912	0.50433
49	5090358	CNOT8	-0.0665237	0.299069	-0.174258	0.00564773	-0.167571	0.049854	-0.192301	0.0290846	6.76304e-05	0.856252	-7.08785e-05	0.667793	0.000299205	0.0443156	-0.000113616	0.74961	0.000131607	0.160093	-0.00149016	0.642766	0.0838346	0.230341	-0.00368322	0.959502
50	1990477	PHLPPL	-0.0139124	0.688595	-0.0490711	0.155277	-0.0765107	0.112023	0.0479163	0.317435	0.000151441	0.453351	-0.000166555	0.0623012	0.000245356	0.00288847	9.26997e-05	0.632154	6.06163e-05	0.236809	0.0048498	0.00562016	-0.0110628	0.77247	-0.0417035	0.287716
51	5910386	FAM13A1	-0.0284563	0.667111	-0.0427459	0.521319	-0.235299	0.0131174	-0.0283163	0.757898	-0.000355208	0.35638	0.000456375	0.00744331	-0.000132447	0.40428	-0.000591599	0.110041	7.33921e-05	0.454575	0.00312771	0.351187	0.140317	0.0564172	-0.0542719	0.465744
52	3990259	PPP2R2B	0.162418	0.0300007	0.21905	0.00372025	0.148922	0.166258	0.209229	0.0444343	-0.00106804	0.0142707	-8.7681e-05	0.649934	0.000731777	4.15801e-05	-0.00072536	0.0832084	0.000800724	5.278e-13	0.0143873	0.000150576	-0.128307	0.123552	0.166368	0.0473505
53	360600	ZSCAN2	0.0111688	0.8033	-0.085835	0.0557839	0.0575429	0.363495	-0.0213723	0.73102	0.000495229	0.057646	-0.000135312	0.242067	2.72266e-05	0.796752	-7.82988e-05	0.75459	8.75754e-05	0.185603	0.000489956	0.828594	-0.0264798	0.594254	-0.0544148	0.278863
54	5390435	PXDNL	-0.0134288	0.639889	-0.032203	0.253233	-4.50668e-05	0.999062	-0.0265685	0.501607	0.000109494	0.512952	2.2545e-05	0.760688	-6.64645e-05	0.31318	-0.000158284	0.321137	-1.71745e-05	0.68149	0.000886609	0.536919	-0.0238492	0.447314	0.0147008	0.650074
55	3310674	FBXW11	-0.00763274	0.819397	-0.0160595	0.632187	-0.00201874	0.966049	0.0467539	0.312574	2.38046e-05	0.902607	-0.000176258	0.0404019	0.000155729	0.0533093	0.000250128	0.180912	8.01157e-05	0.106374	0.000868896	0.608126	-0.0407985	0.270717	-0.00016505	0.996517
56	4830424	FBXW11	0.00728335	0.816674	0.00417709	0.892019	-0.0108718	0.796978	0.0289296	0.501521	-1.00104e-05	0.956221	-1.27573e-05	0.874718	-4.67259e-05	0.521064	-0.000142269	0.415761	-1.79767e-05	0.695102	-0.000252317	0.871947	-0.0395384	0.249315	0.00589007	0.867236
57	7400139	LOC202459	0.0325498	0.349945	-0.0436665	0.204192	-0.0519449	0.275442	0.00533185	0.911338	2.34677e-05	0.907657	-9.17579e-05	0.305997	2.83061e-05	0.729677	-1.16718e-05	0.952036	1.26832e-05	0.804262	0.00037092	0.83186	0.0235403	0.537881	0.00400793	0.918591
58	5890129	PAGE2	-0.0418017	0.11348	0.00892713	0.728762	-0.00537908	0.877973	-0.0283567	0.432116	0.000105855	0.489965	-5.11358e-05	0.45225	3.41376e-05	0.575434	-0.000113012	0.441263	-2.19232e-05	0.568632	0.000755785	0.564762	-0.00642855	0.822885	0.00526274	0.859021
59	1030487	SLC22A17	0.00121114	0.981316	0.0477781	0.359364	-0.0719794	0.33052	-0.0113907	0.874194	0.000264772	0.379853	0.000394603	0.00304799	-0.000313762	0.0114786	-0.000358606	0.21499	-0.000303393	7.77161e-05	-0.0062725	0.0169987	0.041272	0.472747	-0.0462751	0.428342
60	3370471	EIF2AK4	0.0542576	0.624477	0.101278	0.365643	0.169301	0.286854	0.305831	0.0478209	-0.00030415	0.638391	0.000485379	0.0891067	-0.00024958	0.347839	-3.98925e-05	0.948683	-0.000108729	0.508997	-0.00820623	0.145916	0.0359126	0.770879	0.0789803	0.528907
61	1440537	RP11-529I10.4	-0.142394	0.00258424	-0.150326	0.00141721	-0.0518161	0.436168	-0.192248	0.00314496	0.000195183	0.476542	-0.000109109	0.369915	-8.30797e-05	0.461876	-0.000138437	0.600249	-7.18467e-05	0.303216	0.00303584	0.201921	-0.00506526	0.922744	-0.0203391	0.701077
62	7550753	LOC90925	-0.0241027	0.434875	0.00956398	0.754491	0.0166089	0.69383	-0.0144111	0.734947	-0.000706499	8.45247e-05	0.000135742	0.0876266	-7.05861e-05	0.332036	0.000704816	4.13995e-05	8.90559e-06	0.844638	-0.000277352	0.858475	-0.0107886	0.750279	0.0366929	0.294058
63	2260438	OR2AE1	0.0279776	0.356117	0.0607511	0.0428635	-0.0484361	0.240783	-0.0485382	0.247874	-2.48672e-05	0.888273	-0.000105748	0.176169	0.000153765	0.0275642	-0.000204233	0.226078	-5.42748e-06	0.902654	0.00366636	0.0161464	0.0476659	0.153356	-0.0586683	0.0866906
64	2900561	DDX4	-0.0179393	0.548824	-0.0174618	0.544886	0.0573964	0.146492	-0.0481915	0.234582	7.38731e-05	0.668075	4.86887e-05	0.527698	2.89258e-05	0.669127	-0.000124997	0.452706	-4.87545e-05	0.257799	0.000812391	0.579577	-0.0271591	0.403586	0.0196471	0.553261
65	4730446	OR51I1	0.0307139	0.260754	-0.0132691	0.613926	0.0393491	0.275297	0.0185202	0.61632	-1.51965e-05	0.923005	0.000156104	0.026422	-0.000158661	0.0106137	-5.28781e-05	0.727758	4.22602e-05	0.283339	-0.00133178	0.319618	-0.00854125	0.773249	-0.0219451	0.46815
66	110474	DDX59	0.100426	0.0183717	0.122738	0.0042621	0.0215511	0.723944	0.112638	0.0569189	-0.000269754	0.276904	-8.9283e-05	0.415236	8.05036e-05	0.434178	0.000565926	0.0176123	6.9636e-05	0.271209	-0.000242944	0.910554	-0.00138448	0.976655	-0.0251156	0.60224
67	460100	DDX59	0.10314	0.00876726	0.162741	3.68385e-05	0.00489458	0.930156	0.116633	0.0320182	-2.63115e-05	0.908422	-0.000133607	0.186908	0.00013181	0.165072	0.000466194	0.0342014	3.98376e-07	0.994554	-4.20031e-05	0.983169	0.0308783	0.478613	-0.0535619	0.227613
68	1740445	CYCS	0.0656184	0.228349	0.184341	0.000782772	-0.0569918	0.463829	0.104136	0.170423	-0.000457499	0.150319	6.80284e-05	0.628163	3.43201e-05	0.790467	0.000120442	0.692247	0.000117829	0.144513	0.00413254	0.13564	-0.00222625	0.970692	0.0435045	0.478477
69	3060274	OFD1	0.107099	0.129152	0.0265506	0.709293	-0.0825756	0.411396	-0.0528524	0.590651	0.000143907	0.726898	0.000144976	0.424483	8.32252e-05	0.625448	0.000206729	0.600357	4.07329e-05	0.698051	-0.0018689	0.6036	0.0385928	0.622554	0.207084	0.01014
70	2030452	DDX42	0.0561552	0.166614	0.00931679	0.819056	0.0233293	0.685649	0.048486	0.388603	-1.6457e-05	0.944457	0.000102353	0.327464	-4.07878e-05	0.675378	0.00021865	0.335433	-5.44019e-05	0.365977	-0.00264033	0.199067	0.0337381	0.453489	0.0165201	0.71814
71	4040017	DDX42	-0.0672331	0.0607607	-0.0623264	0.0757689	-0.0778928	0.110513	-0.0839971	0.0859433	7.30567e-05	0.724298	9.10285e-07	0.992132	5.56989e-05	0.505191	-8.8091e-05	0.659424	-4.85426e-05	0.353725	0.00108963	0.540245	-0.0481973	0.219461	0.0335544	0.40063
72	4860392	UBXD5	-0.01164	0.70448	0.0262578	0.382698	-0.0633218	0.124321	-0.0886595	0.0352474	2.19084e-05	0.902233	3.90585e-05	0.621303	-8.98308e-05	0.205565	4.02649e-05	0.813541	-1.27244e-05	0.776347	0.000652342	0.67003	0.0155401	0.643034	-0.0598767	0.0824639
73	7200220	UBXD5	-0.0640546	0.0565666	-0.0149887	0.645959	-0.0787599	0.0805691	-0.0236427	0.604506	0.000312072	0.107262	-0.000139902	0.10572	-2.60732e-05	0.736531	0.000171964	0.357985	-0.000134935	0.00568353	0.00264942	0.109831	-0.0173915	0.634845	0.0216996	0.560869
74	2070437	PSME3	0.0399417	0.267673	-0.0165339	0.6462	-0.0420852	0.406861	0.0820783	0.0990552	-9.93164e-05	0.63537	1.49116e-05	0.872174	-1.69286e-05	0.845132	-7.07223e-05	0.725478	0.000173675	0.00114336	-0.0013831	0.447722	0.0288569	0.468756	-0.0375383	0.356328
75	1740746	UHMK1	-0.0636602	0.361166	-0.0496885	0.478851	0.0832511	0.404791	0.182361	0.0591175	-0.00117042	0.00389716	0.000374705	0.0369962	8.28199e-05	0.621738	-0.000482647	0.216239	0.0001875	0.0697998	-0.00185055	0.600231	-0.132604	0.086895	-0.0262999	0.737216
76	3850136	KRTAP15-1	-0.00540182	0.851489	0.042858	0.127077	0.0203322	0.596367	0.0362623	0.358445	3.79908e-05	0.820421	0.000111428	0.134233	-0.000155976	0.0171794	0.000180891	0.259621	-4.90051e-05	0.240762	-0.00167645	0.240599	-0.0171122	0.586829	0.00636978	0.843231
77	4560138	JTB	-0.0670619	0.0553041	-0.0166419	0.632273	0.0170857	0.727499	0.0128671	0.789067	-0.000392939	0.0527342	8.12833e-06	0.928095	-2.98425e-05	0.720957	0.000287463	0.141584	1.93979e-05	0.707063	-0.000458912	0.79405	-0.0386536	0.316741	0.0373598	0.340636
78	6650215	LYN	0.0210985	0.693325	0.0453182	0.398795	0.0589497	0.440508	0.0732198	0.322173	-0.00018879	0.543663	-0.000118727	0.388997	-0.00018159	0.159205	0.000549017	0.0668276	-1.5311e-05	0.846886	0.0021656	0.423399	-0.0416652	0.482728	0.0408692	0.496546
79	2640369	TXNDC4	0.0291186	0.483837	0.00889205	0.831329	0.0393616	0.50288	0.0753639	0.191561	9.05801e-05	0.708613	-3.94791e-05	0.712157	1.01564e-05	0.918975	0.000124807	0.591176	1.12427e-05	0.855453	-1.70939e-05	0.993543	-0.00424567	0.926592	0.0365743	0.438536
80	2900242	RAB37	-0.202555	0.000404333	-0.127286	0.0276229	-0.147798	0.0710883	-0.308595	0.000109184	4.39061e-05	0.895481	-2.17178e-05	0.882848	-1.95859e-05	0.886969	-0.000328646	0.304742	0.000127933	0.132774	0.00880049	0.0025417	-0.0717332	0.259799	-0.0237743	0.714474
81	2060382	TCF2	0.0468942	0.140204	0.0265293	0.390097	0.0740429	0.0816389	0.0136629	0.752036	-4.20922e-05	0.81857	3.32955e-05	0.684252	8.13205e-05	0.265031	-0.000171124	0.333573	1.66891e-05	0.717373	0.000243432	0.876633	-0.0238902	0.490521	0.0433941	0.21934
82	5420022	TCF2	-0.0182036	0.574611	0.0280453	0.368271	0.0132204	0.757423	0.024364	0.577828	0.000222721	0.232865	-9.58775e-05	0.250183	-7.48967e-05	0.315375	0.000101388	0.573916	-2.55527e-06	0.956605	0.000995401	0.530909	0.0262568	0.454588	-0.0530908	0.139444
83	5220767	RPS6KC1	-0.0105502	0.771873	-0.0377153	0.296651	-0.0785774	0.122454	-0.0135861	0.785848	5.02116e-05	0.811884	3.1198e-05	0.73897	-0.000112559	0.195594	-7.38488e-05	0.716453	-2.29832e-05	0.668647	0.000403918	0.825152	-0.0686667	0.086952	0.0306789	0.452323
84	3190246	SSTR5	-0.0433483	0.146106	0.0046124	0.874204	0.0256414	0.526483	-0.03809	0.348355	0.000318295	0.0645691	-5.16103e-05	0.501235	-0.000107116	0.124244	-0.000102759	0.536478	-4.66603e-05	0.283967	-0.000290397	0.844265	-0.0303526	0.3518	-0.038205	0.249887
85	7550131	SLC27A6	-0.0755429	0.0866276	0.0514834	0.244414	0.137363	0.0275603	-0.0952597	0.118888	-0.000146304	0.568698	1.24649e-05	0.912478	4.80426e-06	0.963884	0.000159284	0.518026	-4.49622e-05	0.491952	0.00155371	0.4872	0.0223507	0.647135	-0.00215567	0.965586
86	2320113	CASR	-0.0278415	0.375964	-0.0764396	0.0139178	-0.0374785	0.390468	-0.0542473	0.207934	-0.000239047	0.18911	3.26326e-05	0.686766	4.11273e-05	0.581845	0.000101915	0.561693	3.33231e-05	0.471251	0.000946345	0.547447	-0.0272982	0.430026	-0.0449895	0.200664
87	2570433	STK24	-0.0544929	0.0489009	-0.0438493	0.113954	-0.0589256	0.129909	-0.073702	0.0547789	-0.000125155	0.437723	0.000108519	0.127393	-0.000172867	0.00916925	0.000121303	0.432421	-3.24811e-05	0.428712	-0.0006183	0.659931	-0.0339442	0.267732	-0.00158368	0.959852
88	4850373	STK24	-0.0527624	0.261439	-0.0268193	0.568446	0.0256794	0.697702	-0.0966717	0.136984	0.000273974	0.31632	-0.000136982	0.257036	-6.34349e-05	0.573883	0.000575969	0.0282202	-8.28153e-06	0.90535	0.00129254	0.587027	-0.00137207	0.978934	0.00906512	0.864701
89	7560487	COVA1	-0.0232004	0.555658	0.0160228	0.678607	-0.0480595	0.373788	-0.111392	0.0381723	0.000383552	0.091916	-4.95274e-05	0.624766	-0.000115548	0.214182	-0.000155634	0.478613	4.88321e-05	0.397734	-0.00116572	0.552118	0.04259	0.32362	-0.0575371	0.190329
90	7160670	GALNT8	0.00494659	0.875946	-0.00239684	0.93904	-0.0409615	0.348101	0.022172	0.611738	3.83926e-05	0.834705	-5.2948e-06	0.948332	3.92094e-05	0.593858	5.22002e-05	0.767663	1.13616e-05	0.806548	0.00269743	0.0889725	-0.0157142	0.652581	0.0443369	0.210957
91	5490768	SPTLC1	-0.000300319	0.994706	-0.0410201	0.365724	0.0201068	0.752603	-0.137251	0.0285143	-0.000161792	0.539166	-0.000110695	0.341661	0.000154126	0.15664	0.000211653	0.40262	9.55651e-05	0.154606	0.00294517	0.199325	-0.000883007	0.985933	-0.022141	0.666097
92	5310274	MR1	0.0261554	0.591684	-0.0206245	0.674796	0.0727384	0.297691	0.0645533	0.340552	-0.000245039	0.388293	-0.000173816	0.166038	0.000119772	0.308981	8.68656e-05	0.750284	0.000131799	0.068865	0.000921874	0.709612	0.0100737	0.852478	-0.0143633	0.794457
93	540441	KIAA1787	0.0772965	0.0373623	0.0662658	0.0751859	0.0293255	0.574566	0.0975853	0.0586682	-0.000250076	0.248477	0.000201569	0.0349546	-8.65485e-05	0.327608	-0.000268919	0.19441	-4.71353e-05	0.391626	-0.00178904	0.343052	-0.0304991	0.458599	-0.0034656	0.934539
94	6660327	HAL	0.00297477	0.902129	-0.0047887	0.842275	0.0676794	0.042963	-0.00440862	0.8951	6.24476e-05	0.657589	5.48314e-05	0.378587	-8.87015e-05	0.121363	-0.000268243	0.0467152	4.71183e-06	0.894991	-9.64592e-05	0.937077	0.0146703	0.582068	-0.0115116	0.674477
95	4290524	MAP2K3	0.200227	5.20912e-05	0.314699	2.83524e-10	0.199656	0.00460517	0.212373	0.00205738	-0.00013059	0.651256	4.98341e-06	0.96878	1.03325e-06	0.993074	0.000115364	0.676605	-2.85451e-05	0.697952	0.00391345	0.120682	-0.097026	0.0776009	0.0618082	0.272482
96	4610661	MAP2K3	0.0549739	0.0745022	0.0865854	0.004024	0.0622097	0.128312	0.0566153	0.181464	-4.37303e-05	0.807524	8.74874e-05	0.271271	-6.45519e-05	0.35509	-0.000255942	0.135148	-4.73881e-05	0.28886	-0.00203503	0.184209	0.00585809	0.861861	0.0279461	0.419253
97	2190382	RC74	0.0289379	0.550233	-0.0470263	0.336081	-0.0518257	0.455922	0.0443795	0.510314	0.00044219	0.117403	1.22593e-05	0.921731	-0.000105373	0.365355	-5.94565e-05	0.826355	-3.10355e-05	0.666128	-0.00252267	0.3054	-0.0446768	0.406911	0.0106202	0.845998
98	6250091	SERINC3	0.153635	0.00273399	0.166251	0.00130121	0.117592	0.110114	0.199642	0.00505651	-8.80124e-06	0.976483	4.91488e-05	0.709778	9.74865e-06	0.937123	0.000188872	0.510602	-9.63182e-05	0.205841	-0.00452301	0.0820647	0.0270995	0.634466	0.0168246	0.771027
99	6580601	SERINC3	0.16565	0.00168728	0.0800559	0.132724	0.0289761	0.701173	0.0776806	0.290397	-0.000164468	0.593172	0.000105718	0.436191	-0.000160577	0.205871	-0.000176829	0.548911	6.37829e-05	0.41584	0.00291801	0.277186	-0.0358287	0.541254	0.0169753	0.776579
100	4150010	TBL1XR1	0.0952161	0.027023	0.113297	0.00906247	0.0966612	0.116157	0.0117081	0.845009	-0.000393114	0.117439	-0.000102003	0.357307	0.000105375	0.309776	0.000856826	0.000374286	-7.9024e-05	0.21683	-0.000174283	0.936567	0.0388052	0.417283	-0.0035061	0.942738
101	6350021	GAB2	-0.0224119	0.423999	-0.0215631	0.42981	-0.0555741	0.134958	-0.0433738	0.258002	0.000193717	0.234056	-4.8347e-05	0.503313	-1.20483e-05	0.851277	0.00012018	0.440443	-2.20381e-05	0.588465	-0.00280008	0.0442243	-0.00722011	0.812957	-0.00349555	0.911406
102	5270390	NBLA04196	0.0880169	0.0284358	0.0492585	0.220853	0.00583724	0.918152	0.106201	0.0559265	-0.000384566	0.0997198	-1.29854e-05	0.899995	0.000249954	0.00971951	0.000584405	0.00925997	8.64807e-05	0.146514	0.00171034	0.400266	-0.0764028	0.0857285	0.0556481	0.220081
103	1230348	DIPA	0.00576476	0.887143	0.0770196	0.0598022	0.0943819	0.101843	-0.0509535	0.367119	7.21318e-05	0.760875	5.30497e-05	0.611646	-0.000138634	0.156712	7.69239e-05	0.73474	1.56279e-05	0.795781	0.00104823	0.612434	0.0247845	0.582538	-0.0717509	0.121083
104	6590414	FBXW12	0.00126651	0.96248	0.00211103	0.936324	0.00226017	0.950366	0.046492	0.209534	-0.00012932	0.408756	-7.52004e-05	0.278767	8.52316e-05	0.166272	0.000351223	0.0190731	-1.08994e-05	0.780944	-0.000400612	0.765332	-0.028093	0.341228	0.0394659	0.190818
105	2360064	IPO13	-0.00498999	0.901902	-0.0394951	0.327236	-0.0895315	0.113376	-0.0484396	0.385911	0.000113927	0.628233	0.000102225	0.326575	-0.000127383	0.185932	-0.000444772	0.049098	4.51007e-05	0.450601	-0.000664814	0.744627	-0.00737313	0.868933	-0.044815	0.325617
106	2030564	BBS5	0.0127117	0.711388	-0.0624622	0.0608912	0.0837415	0.0689746	-0.0164663	0.723927	0.000102824	0.60373	8.12904e-05	0.357698	-0.00011046	0.165119	-0.000117779	0.538079	7.19273e-05	0.149898	0.000496083	0.769618	0.00986778	0.791926	-0.022794	0.550297
107	6100239	BBS5	0.00285127	0.911909	-0.0423381	0.0928951	-0.00196954	0.955008	-0.0102897	0.770047	-0.000166816	0.262399	2.68689e-05	0.685922	9.94265e-05	0.0932684	-2.67614e-05	0.852202	2.32305e-05	0.53504	-0.00132897	0.297661	0.0202574	0.472945	0.0202939	0.478705
108	4230538	LDLR	0.296055	0.00580188	0.385162	0.000374474	0.318037	0.0395601	0.500522	0.000784492	-0.00199909	0.00137151	0.000183367	0.507737	0.000341709	0.184567	3.28946e-05	0.956351	0.000229927	0.148601	0.00482312	0.375233	0.118882	0.319495	-0.0413559	0.731379
109	2260133	GK	0.351156	0.00105991	0.341705	0.00157722	0.279298	0.0702203	0.29336	0.0487122	-0.000849062	0.17368	-0.000201296	0.466572	-8.91962e-05	0.729734	0.000347266	0.563239	3.29777e-05	0.835835	-0.0035553	0.512986	0.220665	0.0643024	-0.0777461	0.519048
110	3610128	SLC11A2	0.3302	1.59202e-05	0.406209	1.37704e-07	0.216542	0.0487763	0.288693	0.00655131	-0.000944617	0.0338497	-9.43908e-05	0.632476	0.000338597	0.0649881	0.000825043	0.0540461	-4.86331e-05	0.668114	-0.00122896	0.751255	0.000366953	0.996559	0.0625185	0.466427
111	7560259	RASSF4	-0.0231248	0.797457	-0.194877	0.0318739	-0.093277	0.470478	-0.226192	0.0708932	6.64041e-05	0.899261	-6.34114e-06	0.978249	-0.0004497	0.0362093	-0.000885372	0.0789954	0.000278795	0.0367185	0.00328757	0.471505	-0.135502	0.176497	-0.122808	0.223818
112	1190170	TMEM93	-0.116935	0.00241359	-0.134928	0.000516475	-0.0794573	0.148779	0.000123517	0.998163	6.2501e-05	0.781067	1.18336e-07	0.999048	7.68124e-05	0.406933	-0.00018398	0.393211	9.97267e-05	0.0815726	0.000781954	0.690146	-0.0613593	0.151979	0.00507121	0.907631
113	4760131	TMEM93	-0.126605	0.00127072	-0.135692	0.000574466	-0.097979	0.0769044	-0.109645	0.0443358	0.000232528	0.309949	-5.18321e-06	0.959113	5.58079e-05	0.552783	-0.000133883	0.541745	0.000159253	0.00626539	0.00253725	0.203389	0.031728	0.465998	-0.00771323	0.862653
114	3610402	RAD52	0.0327912	0.270793	0.00754152	0.798531	-0.0304213	0.461988	0.0890354	0.0300634	8.92029e-05	0.605879	-2.31396e-05	0.762959	5.37921e-05	0.442078	0.000196672	0.236583	-3.98507e-05	0.362672	-0.00331245	0.0266903	0.0261778	0.425325	0.00845271	0.800024
115	1230689	ANKRD2	0.00482025	0.861273	0.0311216	0.242593	0.0513623	0.158934	0.050124	0.180493	9.99977e-05	0.529822	8.40082e-06	0.905855	-6.17111e-05	0.325885	0.000180556	0.239131	3.56048e-05	0.371637	0.00126035	0.352482	-0.000682104	0.981835	0.0524443	0.086808
116	2750739	SLC11A1	0.119789	0.365732	-0.00634368	0.962145	-0.0261104	0.891099	0.268302	0.144871	-0.000492217	0.52317	0.000102044	0.765256	-0.000300091	0.344204	-0.000161887	0.827173	-0.000267503	0.17319	-0.00420142	0.531499	0.0211089	0.886142	0.142414	0.337729
117	4260717	LOC284739	-0.00715936	0.835322	0.0375142	0.268796	0.0542013	0.247413	-0.00864679	0.854991	3.59607e-05	0.857337	5.78939e-05	0.513824	-8.04257e-05	0.317997	-0.000231687	0.227099	2.98975e-05	0.553774	-0.00125798	0.465554	0.0330281	0.381572	-0.0199953	0.605579
118	4670017	KRTCAP3	0.0259833	0.403345	-0.012384	0.6863	0.0140862	0.73828	0.0304104	0.477729	6.63618e-05	0.713891	0.000103402	0.196768	-0.000158689	0.0282672	0.000121052	0.484258	1.40141e-05	0.758365	-0.00194468	0.212418	-0.00732977	0.829774	0.0294873	0.400549
119	1500328	IL18R1	0.269785	0.000151508	0.125429	0.0810028	0.15497	0.130139	0.05435	0.583056	-0.000187279	0.65171	-9.56777e-05	0.601941	0.000132993	0.438193	-0.000860554	0.0309366	0.000366479	0.000528774	-0.00457752	0.205279	-0.020341	0.797285	0.00187833	0.981344
120	6290468	TPH2	-0.0187367	0.538592	-0.0504476	0.0885724	0.00385978	0.924748	-0.0236103	0.569276	-0.000148271	0.39887	-5.85089e-05	0.456251	4.74136e-05	0.495683	0.000220861	0.193074	-8.47795e-06	0.847606	-0.00129936	0.387153	0.0389583	0.241592	-0.000796216	0.981217
121	1170438	MTHFS	-0.0497696	0.567778	-0.0124722	0.887224	-0.197262	0.115681	0.119829	0.322559	-0.000386532	0.446193	-0.00020003	0.373202	8.83986e-05	0.672425	0.000553353	0.256611	-2.18125e-05	0.865989	-0.00113685	0.796969	0.0210313	0.828239	0.08994	0.358513
122	4040189	IFNB1	1.47196	3.89019e-06	2.1184	4.65676e-11	1.43774	0.00173383	1.12063	0.0115035	-0.00277197	0.135444	3.58013e-05	0.965303	0.000697966	0.359332	0.00385525	0.0306789	-0.000487691	0.302177	0.0270851	0.0940316	-0.0260564	0.94149	-0.0243467	0.945675
123	2650609	IKIP	0.0179574	0.548317	-0.0721358	0.0146588	0.00194222	0.962475	-0.0230849	0.573648	0.000165109	0.340991	-6.47973e-06	0.932887	-2.47917e-05	0.726997	-0.000323446	0.0526534	7.39622e-05	0.0930449	0.00110536	0.460817	-0.00968472	0.768195	0.00910922	0.786103
124	2570458	NPIP	0.0409748	0.428105	0.13103	0.0118815	-0.0505417	0.491936	0.0623497	0.385876	-0.000324736	0.28164	-1.79145e-05	0.892866	0.000307356	0.0136174	3.12702e-05	0.913851	8.07655e-05	0.293283	-0.00182156	0.488892	0.0369685	0.519565	0.0172703	0.769011
125	2940484	SLC35A3	0.163709	0.00738929	0.12904	0.0358601	0.123088	0.159408	0.116241	0.16988	-0.000507551	0.153391	0.00012202	0.437993	0.000351161	0.0173697	9.61757e-05	0.778656	4.85581e-05	0.592496	-0.000951976	0.758519	-0.0110041	0.871166	0.0538353	0.434582
126	4280332	DDX24	-0.0255052	0.652753	0.121739	0.0335121	-0.0279474	0.731944	-0.00958796	0.903287	-0.000268703	0.416266	9.20925e-05	0.528524	0.000214355	0.115513	-0.000302828	0.340125	-4.25322e-05	0.613232	0.00343389	0.232802	0.0502961	0.425183	0.0556887	0.383308
127	4570132	KLC2	-0.0220118	0.404615	0.0303659	0.237296	-0.0401341	0.251533	-0.036048	0.318848	0.000153175	0.317867	-3.279e-05	0.630268	5.87636e-05	0.325354	-1.31027e-05	0.928892	-4.85561e-05	0.203763	0.00172004	0.188403	-0.00577543	0.841082	-0.00938254	0.750562
128	6220056	KLC2	-0.0342785	0.175759	0.048942	0.0447758	-0.0175145	0.600438	0.0380555	0.266863	-2.58573e-06	0.985847	-4.58303e-05	0.482102	5.25031e-05	0.361089	-0.000191104	0.174768	6.78744e-05	0.0629485	-0.000842819	0.496894	0.0156194	0.569897	-0.0179965	0.521005
129	7400706	FBXO22	-0.00622642	0.861275	-0.0881982	0.0118806	0.0334414	0.495534	-0.0569791	0.241787	0.000230601	0.263057	7.88207e-05	0.389778	-0.000122782	0.145587	-3.02568e-05	0.879064	-4.43606e-05	0.396431	-0.00127945	0.471469	-0.0596544	0.127	0.0199476	0.61612
130	3180168	COL4A2	0.00991184	0.695553	0.0443815	0.0724118	0.00616422	0.854451	-0.046019	0.184964	-9.46398e-05	0.520421	3.2744e-05	0.61607	9.55431e-07	0.986811	2.64016e-05	0.851221	1.46976e-05	0.689358	-0.00138424	0.271331	0.00154928	0.955248	-0.0414035	0.14499
131	4480102	ZNF193	0.188797	0.00126075	0.115147	0.0512922	-0.0358927	0.66827	0.107351	0.187577	-0.000690344	0.043215	-0.000319153	0.0341135	0.000288484	0.0411833	0.000367274	0.262156	0.000386068	9.16912e-06	0.00290329	0.329735	-0.0390338	0.548525	-0.0348933	0.599435
132	1940398	DHRS4	-0.198502	0.00659883	-0.205023	0.00542723	-0.232087	0.0270847	-0.420097	3.54452e-05	0.000278023	0.513675	-5.25701e-05	0.780078	-0.000140128	0.425356	-0.000334371	0.413711	9.61889e-05	0.375261	-0.00216274	0.559766	0.0297362	0.71444	-0.106637	0.195307
133	5340722	ZNF480	0.00561166	0.904396	-0.0544961	0.237823	-0.106025	0.102198	0.00340109	0.957586	0.000222159	0.411327	-5.31906e-05	0.658028	5.64008e-05	0.612723	0.000473882	0.0693888	-5.70908e-05	0.406562	-0.00119677	0.608694	0.000817244	0.987308	0.00139853	0.978653
134	2190376	ATAD2	0.0786609	0.0823324	0.0799943	0.0765777	0.0225158	0.724022	-0.0832596	0.182199	-4.13638e-05	0.874964	-3.04014e-05	0.794145	0.000223915	0.0392423	0.000126175	0.618139	-6.22103e-05	0.352937	0.00221329	0.332331	0.0170534	0.733236	0.0605192	0.234566
135	2120019	SERPINB11	-0.0380799	0.202763	-0.0352881	0.225445	-0.0319705	0.419852	-0.0846204	0.0389009	2.38531e-05	0.890783	4.5012e-06	0.953455	-1.44276e-05	0.831071	-0.00017693	0.287042	7.06868e-05	0.102298	0.00285108	0.0543217	-0.0319236	0.327705	-0.0289205	0.387133
136	1070703	ZNF554	0.0170134	0.621753	0.0191473	0.569363	0.0547257	0.231744	0.0606811	0.198767	0.0002366	0.237794	2.67803e-06	0.975959	-1.61876e-05	0.838164	-0.000196964	0.304012	-1.28413e-05	0.797991	0.000805837	0.638503	-0.00887868	0.81306	-0.00874434	0.821339
137	2470044	ZNF101	-0.122177	0.0950593	-0.104966	0.154639	-0.139788	0.183961	-0.273568	0.00702549	0.00140345	0.000979707	0.000194246	0.303244	-0.000304852	0.0837552	-8.3688e-05	0.838254	-0.00033852	0.00182248	-0.00541801	0.143893	0.0620825	0.445501	-0.0666261	0.417897
138	2470243	HIST2H2AB	-0.00890824	0.891298	0.127185	0.0522405	-0.0384939	0.679089	-0.153055	0.0905098	-0.000125197	0.741206	-4.18627e-05	0.80348	-7.41726e-05	0.632297	0.000106507	0.770171	0.000115042	0.232737	0.00242405	0.462065	0.032837	0.650267	0.028777	0.693353
139	1230402	HTLF	-0.0987491	0.00919304	-0.158429	3.28989e-05	-0.206922	0.000120553	-0.211874	5.78001e-05	0.000105855	0.632074	-3.67975e-05	0.705935	-3.04196e-05	0.738972	0.000159579	0.451387	2.1575e-05	0.701708	-0.00262512	0.173506	0.0284674	0.49855	-0.0292948	0.496789
140	130041	C8G	0.0144658	0.648813	-0.0286332	0.356061	-0.0262272	0.543416	0.0182206	0.673373	-6.24588e-05	0.733442	8.17465e-05	0.316918	0.000183769	0.0137616	-0.000533154	0.00260335	8.78206e-05	0.0586838	0.00222693	0.157441	-0.0785978	0.0235205	0.0146875	0.678055
141	5130725	THNSL1	0.0214133	0.575074	0.0130184	0.732526	-0.0368055	0.490864	-0.0338081	0.522098	-1.95537e-05	0.929883	2.27669e-05	0.816931	3.55916e-05	0.694591	0.000367291	0.0849725	-2.95033e-05	0.600995	-0.00239202	0.214813	0.0226541	0.591407	-0.0258903	0.547637
142	2120022	BRD8	-0.0369902	0.251707	-0.0425964	0.174383	0.0101063	0.814923	-0.0118143	0.787837	0.000251418	0.177602	-3.22894e-05	0.697389	-4.32567e-05	0.562602	-6.85393e-05	0.702719	-2.68661e-05	0.56729	0.00079986	0.616128	-0.0227519	0.517248	0.0155798	0.66474
143	3780367	CNNM2	-0.112013	0.000217689	-0.0839095	0.0056735	-0.0560562	0.186314	-0.209588	5.97754e-07	0.000106016	0.548226	4.9079e-05	0.528889	3.71228e-05	0.608972	-3.61182e-05	0.830877	2.47219e-05	0.582034	0.00234149	0.127919	-0.107923	0.00127342	0.00794064	0.817864
144	6760008	CNNM2	-0.156117	4.56951e-05	-0.110289	0.00398643	-0.207571	0.000135376	-0.177913	0.000750268	0.000362495	0.102936	-3.49621e-06	0.971706	-7.73895e-05	0.402494	-0.000294965	0.168809	2.74046e-05	0.628931	0.000271063	0.888442	-0.0295839	0.485294	-0.0348998	0.417249
145	1510097	TMEM17	-0.0511856	0.068236	-0.0390006	0.161662	-0.0361937	0.354795	-0.0717775	0.0634373	-6.61306e-07	0.996757	-0.000108956	0.132413	-1.15136e-06	0.986016	0.000132632	0.397477	-6.60192e-05	0.108929	-0.000227724	0.871304	-0.0188491	0.543073	0.0282458	0.367162
146	6480035	PPGB	-0.129958	0.073717	-0.0300196	0.682236	0.00360443	0.97233	-0.19941	0.0487729	-0.00070127	0.0981837	9.27566e-05	0.619944	-0.000391192	0.025249	9.61654e-06	0.98112	4.60612e-05	0.669713	0.00507079	0.170428	-0.0827879	0.30542	-0.0202757	0.805681
147	6980066	NTRK2	0.00954965	0.753458	0.000314604	0.991465	0.0397243	0.323331	0.0179628	0.663231	-1.50035e-06	0.993187	-4.46867e-06	0.954431	-5.301e-05	0.451237	1.28204e-05	0.93952	1.66091e-05	0.707155	-0.00141738	0.344677	-0.0213419	0.517226	0.0291906	0.388873
148	7330333	IL17B	0.0517631	0.050726	0.0429785	0.0966072	-0.00588014	0.867187	0.0311602	0.391375	-0.000231092	0.133834	0.000111314	0.10324	-8.05912e-05	0.182184	0.000163056	0.26809	-1.6574e-05	0.666578	-0.000972358	0.460532	-0.00983959	0.733454	-0.00930446	0.754444
149	3290292	PRMT3	-0.00502078	0.879448	0.054517	0.0864865	0.0858786	0.0492973	0.0656453	0.141579	-8.68611e-05	0.648489	0.000152802	0.0724942	-5.51824e-05	0.469596	0.000510189	0.00556521	-2.62859e-05	0.583692	-0.000123199	0.939429	0.016178	0.651536	0.0349031	0.341149
150	2070520	ABHD7	0.0476145	0.468026	-0.0196889	0.765587	0.0930967	0.321495	0.0720653	0.428773	-0.000186013	0.626002	-3.94634e-05	0.815747	0.00042577	0.00642763	-0.000887575	0.0155938	9.45262e-05	0.330296	0.0115322	0.000514088	-0.0839935	0.249574	0.0585691	0.42529
151	4050136	INHA	0.0140967	0.620915	-0.0101145	0.719411	-0.0225955	0.564035	-0.0439396	0.26209	0.000336252	0.0421001	-0.000133723	0.0684254	-1.88052e-05	0.778838	-0.000115375	0.467857	-3.98501e-05	0.341099	0.00235644	0.0989064	-0.000284322	0.992757	0.00839529	0.792981
152	4200193	MARVELD3	-0.0623012	0.0665553	-0.054691	0.102456	0.010329	0.825442	0.0124535	0.788996	-0.000557147	0.00457747	8.19975e-05	0.348581	-1.69465e-05	0.831479	0.000101963	0.590546	4.03968e-05	0.416824	0.000649819	0.701285	-0.0132755	0.722157	-0.00873789	0.817577
153	5890470	MARVELD3	-0.0196648	0.4943	-0.0564548	0.0463028	-0.0620697	0.111416	-0.0555952	0.16136	0.000355291	0.0339342	-0.000115928	0.118188	4.2838e-05	0.516123	-0.000175884	0.272056	4.08178e-05	0.330836	0.00259901	0.0708406	-0.00989965	0.754086	-0.078119	0.0156219
154	3180152	LOC115098	-0.0870962	0.0485418	0.0250884	0.573837	-0.0523722	0.407194	-0.0175645	0.775243	0.000446029	0.0836139	-2.57581e-05	0.8206	-4.66624e-05	0.661712	-0.000816369	0.000949292	-4.28278e-05	0.514298	0.00384715	0.0873372	-0.00724032	0.882736	-0.0123586	0.805731
155	7150500	FLJ42957	-0.0104725	0.846164	0.0790782	0.145723	-0.0442253	0.566027	-0.0539959	0.471257	0.000180108	0.56678	4.8565e-05	0.726578	-0.000190426	0.14374	9.76373e-05	0.746453	-0.000249339	0.00187551	0.000373472	0.891632	-0.0306589	0.608926	-0.0101131	0.868553
156	290538	ASF1A	0.0576658	0.34004	-0.0422089	0.48728	-0.024725	0.773007	-0.0517965	0.538471	0.000803275	0.0228414	-0.000132477	0.394863	0.000129596	0.366263	0.000434014	0.198375	-0.000118674	0.185204	0.00058672	0.848563	-0.0224956	0.73756	-0.0658755	0.335439
157	830010	C21orf37	-0.00652012	0.826833	-0.0181762	0.526158	-0.0244144	0.534951	0.0165282	0.681562	-5.49048e-05	0.748964	4.62581e-05	0.54632	-7.46131e-05	0.273743	4.63356e-05	0.779799	-5.52079e-05	0.199945	0.00110297	0.449982	-0.041376	0.200291	0.00367604	0.911336
158	4120142	ZSCAN2	-0.0337622	0.275332	-0.0289366	0.348951	-0.0545876	0.205841	-0.0324894	0.448414	0.000216438	0.230028	-4.02896e-05	0.613046	-2.09279e-05	0.775927	1.58118e-05	0.927041	3.16166e-05	0.489611	0.000863858	0.581338	0.00232225	0.945844	-0.0104451	0.765865
159	3940039	OR8D2	-0.0288299	0.323904	-0.0364109	0.199271	-0.0597441	0.12266	-0.0212505	0.594168	0.000221969	0.189907	-4.65926e-05	0.536222	1.66635e-05	0.801876	-0.000252802	0.119725	-6.05822e-07	0.98857	-0.000716817	0.619586	-0.00256735	0.935684	0.0399419	0.22044
160	1230292	MGC52498	0.110735	0.0671891	0.0498222	0.411063	0.045817	0.593305	0.0601382	0.472809	0.000178041	0.612477	0.000398569	0.0106853	-0.000305409	0.0328823	0.000254688	0.451423	-0.000326423	0.000255322	-0.00948655	0.00187113	0.00804391	0.904591	0.104093	0.123885
161	5550725	ZDHHC24	0.0137758	0.698547	0.0104016	0.769968	-0.00824555	0.867864	-0.0364253	0.460315	0.000263158	0.20472	-9.24879e-05	0.312416	-1.96194e-05	0.816761	4.11861e-05	0.835558	5.10413e-05	0.332378	0.00473855	0.00868313	-0.108072	0.00597951	0.0158032	0.696494
162	4890376	OR10H4	-0.0140222	0.617123	-0.0305636	0.256771	-0.0339575	0.35891	-0.0228385	0.546213	-0.000149528	0.354351	4.27645e-05	0.553067	-2.09326e-05	0.745891	-0.000273846	0.0790498	3.38716e-05	0.404456	-0.000902854	0.511034	0.019435	0.522037	-0.037079	0.232672
163	4070195	FLJ30046	-0.0969207	0.0448884	-0.0105937	0.827794	-0.0656789	0.33877	-0.0252306	0.707831	4.90029e-05	0.862169	-2.52161e-05	0.839297	0.000354862	0.0022152	0.00018587	0.491135	5.71735e-05	0.425908	0.00135305	0.582905	-0.0688685	0.199547	0.00985639	0.85797
164	2810341	C1orf69	0.135137	0.0145983	0.226122	5.17644e-05	0.111924	0.15903	0.240987	0.00177434	-0.000569774	0.0775643	-8.95711e-05	0.530142	0.000294097	0.0261794	-0.000111726	0.718061	0.000154499	0.0599118	0.00321725	0.252811	-0.0463495	0.451685	0.0371943	0.550644
165	460484	KIAA1026	-0.0354223	0.211974	-0.0427725	0.132946	-0.0126249	0.752839	-0.086618	0.0283711	0.000428642	0.00965878	-0.000161008	0.0277509	-1.65448e-05	0.804487	-4.46658e-05	0.777939	-2.74208e-05	0.51343	0.00168504	0.24157	0.0323636	0.304214	-0.0100208	0.754115
166	3520484	KIAA1026	-0.00521262	0.868923	-0.018746	0.539215	-0.0475046	0.255445	-0.0972362	0.0232851	-0.000215741	0.237055	6.19911e-05	0.445624	3.97754e-05	0.583981	1.69031e-05	0.923304	-3.14476e-05	0.492474	-0.000767647	0.621737	-0.0669609	0.0506542	0.0245238	0.485323
167	1170324	HERC2	0.0205808	0.696354	0.070369	0.184991	0.021106	0.779795	0.0540928	0.459868	-0.000196087	0.522938	0.000231534	0.0884912	5.14149e-06	0.967578	-0.000230982	0.433721	-0.000136279	0.0814096	-0.0026478	0.32194	-0.0244301	0.676779	0.0900681	0.128787
168	5490470	CCNG2	-0.109371	0.0304237	-0.198999	8.58674e-05	-0.176621	0.0128326	-0.200837	0.00419773	0.00015184	0.606433	4.0856e-06	0.974933	-0.000266554	0.0273962	0.000315555	0.263272	-0.00011599	0.121625	0.00057254	0.823583	0.0430805	0.441313	-0.0606797	0.291465
169	7150408	C1orf84	0.245791	0.00645641	0.134327	0.140219	0.323876	0.0125292	0.340865	0.00659648	-0.000461024	0.38051	0.000333839	0.151161	9.69481e-05	0.654851	0.000301352	0.550805	-0.000129735	0.332779	-0.00154127	0.736464	-0.0639611	0.524006	0.0834539	0.411519
170	2650551	FLJ35119	-0.0298945	0.447614	-0.0395203	0.311884	-0.00739294	0.893299	-0.0183216	0.734549	-0.000166856	0.464445	0.000151203	0.135503	-9.02658e-05	0.338072	-0.000137548	0.531897	4.03411e-05	0.487284	-0.000211282	0.914856	-0.0221617	0.609621	-0.00710765	0.871958
171	6980328	SCNM1	0.0189459	0.566326	-0.0114742	0.730715	0.00242286	0.958996	0.0475209	0.301874	0.000202444	0.294017	-0.00016499	0.0522525	3.70614e-06	0.962843	-7.85881e-05	0.670454	7.39989e-06	0.880254	-0.000707858	0.674295	-0.0208306	0.570509	-0.0612641	0.103428
172	610370	ATP5O	-0.0898596	1.8127e-05	-0.0569359	0.00665465	-0.0902162	0.00206833	-0.0892364	0.00216667	0.00014731	0.228477	2.625e-05	0.626627	-1.67762e-05	0.736506	0.000224081	0.0553355	-0.000145641	2.69735e-06	-0.00201317	0.0586082	0.00564344	0.80774	0.00234842	0.921608
173	5890307	H3F3A	-0.0304981	0.426967	0.00601885	0.875235	0.0634981	0.237554	0.00282141	0.957583	-0.000153543	0.491729	4.88646e-05	0.620754	-5.53653e-05	0.547018	0.000137622	0.520945	-0.000119582	0.0353988	0.000325732	0.866759	-0.00091141	0.98285	0.0219836	0.612737
174	2480240	OR9G1	0.0281391	0.390792	-0.034979	0.278664	-0.0338684	0.449519	0.03188	0.479097	0.000173883	0.360681	-1.48667e-05	0.860307	6.36822e-05	0.403475	-0.000229795	0.208543	1.44834e-07	0.997591	-0.000689049	0.673894	0.0237702	0.509035	-0.0723363	0.0487369
175	3850148	SHANK2	0.0446606	0.177391	0.0447626	0.160263	0.0174173	0.690375	0.0199115	0.656645	0.000100912	0.596536	-3.59179e-05	0.673445	-0.000102773	0.173043	0.000244779	0.18376	1.34623e-05	0.778165	-0.000481054	0.766816	-0.00218422	0.951517	-0.0207331	0.571838
176	4040221	SERPINB1	-0.0750389	0.221963	0.00643965	0.917061	-0.141634	0.107813	-0.00757501	0.929124	-0.000173141	0.627994	-0.000262481	0.0975858	6.8012e-06	0.96322	-0.000346314	0.31393	8.11142e-06	0.929021	-0.00143512	0.644579	-0.0256432	0.707264	-0.0570085	0.408291
177	1470605	C19orf12	0.0851101	0.0219278	0.0243292	0.512556	0.0931574	0.0733615	0.109731	0.0330798	-0.000271947	0.20899	0.000162003	0.0901296	2.30929e-05	0.794043	-0.000128366	0.535745	-1.11457e-05	0.839348	-0.000911338	0.628329	-0.0603086	0.14209	-0.0113678	0.787232
178	4640768	C19orf12	0.117758	0.22107	-0.0233764	0.809607	0.122725	0.373907	0.0646777	0.628633	-0.000359988	0.520724	0.000338612	0.171945	4.17422e-05	0.856875	1.52778e-05	0.977367	2.62331e-05	0.854305	0.00734371	0.132688	-0.213186	0.046288	-0.139419	0.198724
179	110711	ABCG4	0.0311331	0.322748	-0.00644654	0.833869	0.0450846	0.280497	0.00986362	0.819671	-2.40082e-06	0.98955	3.64833e-06	0.964178	-3.65771e-05	0.607554	8.70074e-05	0.61903	7.61512e-06	0.867417	0.000758429	0.627841	-0.0161802	0.637996	0.0295578	0.402654
180	1070382	TRIP4	0.0639787	0.0586141	-0.0255822	0.449913	-0.0338434	0.478309	0.0083408	0.858668	4.19222e-05	0.831361	-6.56844e-05	0.450797	-1.64131e-05	0.838971	2.82082e-05	0.881369	9.85272e-05	0.0491205	0.00374636	0.0286033	-0.0978462	0.00899508	0.0049904	0.89591
181	7380162	WFDC12	-0.0296298	0.276558	-0.0159743	0.546533	-0.0123777	0.732946	-0.0327258	0.379244	0.000101014	0.521943	-8.04524e-05	0.251851	5.26715e-05	0.394438	1.20579e-05	0.936558	5.40401e-05	0.170417	0.000327542	0.807849	-0.00429947	0.884957	-0.004985	0.869553
182	240731	C22orf5	-0.005995	0.938857	0.0566031	0.472448	-0.0481819	0.667751	0.148882	0.170005	-0.000572912	0.207861	-7.29134e-05	0.717402	0.000126472	0.50085	-0.00097405	0.0259947	0.000210224	0.0698413	0.000695496	0.860661	-0.0225143	0.795585	0.0100676	0.908786
183	1110270	EYA2	-0.000718131	0.980048	0.0351866	0.20717	-0.00182136	0.961816	-0.0582538	0.136457	-4.93033e-05	0.76696	1.43803e-05	0.845752	1.38984e-05	0.833981	0.000102506	0.520621	-6.06468e-05	0.14658	-0.00052313	0.713013	-0.000370452	0.990521	0.0443348	0.167345
184	7650161	EYA2	0.0175891	0.55176	-0.00870601	0.761416	0.0189712	0.627803	0.00450155	0.911145	-5.39097e-05	0.752837	-2.38201e-05	0.754586	2.49912e-05	0.708791	0.000270791	0.0993893	3.85485e-05	0.366731	0.00101791	0.485401	-0.0291358	0.365408	-0.00198792	0.951871
185	1010242	BATF2	0.0117532	0.712004	-0.00216043	0.943874	-0.0404559	0.336091	0.0227149	0.598494	-0.000192738	0.29305	-3.33942e-05	0.683938	-4.26955e-05	0.553285	9.08985e-05	0.607794	9.91323e-07	0.982747	-0.00222413	0.154009	0.0165797	0.631784	0.048548	0.168542
186	2000228	FLJ90709	0.108374	0.00353637	0.0467295	0.206161	0.0686609	0.186391	0.106624	0.0373219	-0.000191365	0.374976	0.000189478	0.0476513	-6.46128e-05	0.464013	0.000243295	0.241021	3.3083e-05	0.546018	-0.00094601	0.612814	-0.0577956	0.158779	0.0352694	0.397659
187	4880014	AQP2	-0.0500125	0.0956557	-0.0156453	0.596486	-0.0470683	0.254781	-0.0369018	0.368629	0.000122839	0.479189	2.92576e-06	0.969787	2.15248e-05	0.761053	-0.000202035	0.22774	2.50427e-05	0.569456	-0.000294828	0.84383	0.00175523	0.957517	0.0262938	0.432523
188	5340102	PCDHB3	0.0127323	0.706574	0.0226689	0.486816	0.0182932	0.682215	-0.046991	0.305161	6.3445e-05	0.744566	0.000105544	0.225829	-5.51033e-05	0.471371	-0.000277783	0.139836	1.75697e-05	0.718255	0.000429181	0.795682	0.0195883	0.594055	-0.0516465	0.167937
189	4760196	UEV3	0.0886747	0.0195476	0.0648863	0.0859078	0.051391	0.331928	0.0515982	0.324074	0.000197868	0.369696	-0.000114214	0.242363	-1.4324e-05	0.874533	0.000219574	0.300473	0.000100697	0.0727511	0.000375939	0.844269	0.00495669	0.905761	-0.0798071	0.0622349
190	4570241	IDI2	-0.0411614	0.339579	-0.000421961	0.992088	0.0471421	0.43027	0.0658765	0.263833	6.36045e-05	0.798703	-2.05757e-05	0.852725	3.04155e-05	0.767385	0.000155904	0.517219	-3.63913e-05	0.566281	0.000304904	0.88751	-0.0403595	0.394154	0.0293384	0.542844
191	1050192	STEAP1	0.00566261	0.86655	0.0498551	0.133835	0.00834674	0.85767	-0.0516104	0.26377	0.000243727	0.211489	-0.000117096	0.177192	-0.000151573	0.056083	0.000419832	0.0255969	-2.80229e-05	0.570859	0.00140333	0.404378	0.0151888	0.681837	0.0112939	0.764094
192	4220014	STEAP1	0.0120508	0.681476	0.00726101	0.798247	0.00481723	0.901297	0.0261746	0.511498	-0.00022131	0.1922	-5.5668e-05	0.461233	-1.51127e-06	0.982157	0.000531601	0.00112372	5.71034e-05	0.180226	0.00283759	0.0499922	-0.0176739	0.578989	0.0421905	0.196951
193	3870102	LRRC8C	-0.0066475	0.923891	0.131311	0.0608366	-0.0453283	0.650103	0.00630204	0.947857	-0.000309568	0.444231	5.31906e-05	0.766693	-1.24534e-06	0.994089	0.000419697	0.281735	4.85253e-05	0.638372	0.00195236	0.579409	0.0517562	0.503176	0.0478866	0.540671
194	3130253	DLC1	-0.00900567	0.757469	-0.00891383	0.752346	0.064241	0.0981829	0.0548014	0.165962	0.000158217	0.347384	3.86373e-05	0.606354	-0.00015368	0.0232807	0.000114746	0.479327	-3.70973e-05	0.382229	-0.000104516	0.942098	-0.021558	0.496021	0.0285875	0.378489
195	6040639	AIM2	-0.0814329	0.314077	-0.19829	0.0150673	-0.0587296	0.612033	-0.276007	0.0144351	0.000572161	0.225769	-0.000143828	0.490535	-0.000102493	0.59371	0.000318078	0.4816	-0.000149757	0.21192	-0.00255329	0.534901	0.0695125	0.439985	0.116998	0.199232
196	5890445	FCHSD2	-0.0914531	0.0450862	-0.0602633	0.189305	0.0134834	0.83571	-0.124513	0.0492847	0.000159448	0.548575	0.000154283	0.188894	-0.000368661	0.0008062	0.000916895	0.000328345	-0.00015035	0.026538	-0.00380409	0.100587	0.00779385	0.877686	0.0181186	0.725749
197	460121	APBA1	-0.0256182	0.391871	-0.036798	0.208278	0.0234856	0.559693	0.0760467	0.0634929	0.000195717	0.258915	-0.000108056	0.16129	-8.97649e-05	0.18944	-7.40478e-05	0.656659	3.0202e-05	0.487064	-0.000486531	0.74309	-0.00499196	0.878819	-0.0059965	0.857398
198	2810768	ABCD4	0.0413419	0.18095	0.056447	0.0630118	0.116684	0.00471263	0.0841781	0.0476926	-5.60642e-05	0.755525	-8.05412e-05	0.311989	6.21225e-05	0.385302	0.000430479	0.0122017	-1.95826e-05	0.664536	0.00160772	0.299017	-0.032089	0.341625	0.0220489	0.527967
199	5490110	TRAF3	0.0199154	0.588261	0.0198763	0.59068	-0.0099895	0.848102	0.13717	0.00725973	0.000144049	0.501714	-0.000212033	0.025148	7.08667e-05	0.421063	0.000678296	0.000967351	-0.000148375	0.00654629	0.0006668	0.721107	-0.0408572	0.316693	0.0547349	0.188765
200	3930390	BCL11B	0.00416479	0.895089	-0.00706465	0.820586	0.0553989	0.198943	0.0133279	0.759525	-8.22591e-05	0.65412	8.33557e-05	0.306049	-0.000121817	0.0943692	4.71254e-05	0.788818	-2.185e-05	0.635889	-0.0015166	0.33692	-0.0504941	0.145989	0.0544976	0.123533
201	4850128	GZMH	-0.0367324	0.685851	-0.00860905	0.925186	0.033128	0.799818	0.0764336	0.545086	-0.000395283	0.454993	-7.50138e-05	0.748645	0.0008516	9.39316e-05	-0.00148783	0.00342728	0.0006991	2.13322e-07	0.014978	0.0011533	-0.126681	0.209924	0.0600612	0.556721
202	5820072	PPP1R15A	0.31478	0.000146144	0.563749	1.43325e-11	0.561658	2.38613e-06	0.478344	3.10982e-05	-0.00075754	0.11608	0.000563568	0.00833147	-0.000421194	0.0352067	0.000375564	0.418659	-0.000303432	0.0136114	0.00083453	0.84239	-0.0151096	0.869704	-0.0697426	0.454254
203	7610441	ZNF175	0.0182707	0.65767	-0.0368665	0.368204	-0.000343219	0.995252	0.068115	0.229895	-4.39863e-05	0.853984	-0.00010063	0.343572	4.41605e-06	0.963904	0.000673757	0.00344421	8.724e-05	0.150518	-0.00277596	0.179638	0.000928186	0.98373	-0.0789869	0.0866247
204	5820021	MLX	-0.00622123	0.862952	-0.066424	0.0674417	-0.0268748	0.599733	-0.0142217	0.776942	3.89099e-05	0.853337	-3.26962e-05	0.724398	0.000122279	0.157869	-0.000377876	0.0605776	1.47192e-05	0.783467	-0.00333531	0.0695077	0.0817725	0.0410994	-0.0350574	0.393469
205	2650372	APITD1	-0.0308186	0.353577	-0.0427627	0.194282	-0.0295393	0.517115	-0.00235664	0.95915	0.000136105	0.48238	3.08844e-05	0.718341	-5.55572e-05	0.471094	0.00020673	0.263842	3.09807e-05	0.525128	0.00199776	0.232229	-0.0112937	0.757763	0.0545327	0.145822
206	2260497	MAP4K5	-0.0422123	0.339182	-0.0202463	0.649316	-0.0415466	0.509258	0.0135095	0.825883	-0.000431249	0.0940871	-1.61452e-05	0.886976	0.000214335	0.0445431	0.000137333	0.578207	0.000101047	0.12389	-0.00142484	0.526221	-0.102625	0.0363804	0.0287456	0.567194
207	3890128	LAT	-0.0174376	0.702197	0.0493614	0.283792	0.0510799	0.43443	-0.0288444	0.649523	0.000239748	0.367489	0.000106278	0.365077	-3.13225e-06	0.977319	-6.84995e-05	0.788404	-0.00023326	0.000581261	0.00258302	0.265614	-0.0233475	0.645095	0.00435204	0.93298
208	2480181	TCEA2	-0.09573	0.0109553	-0.068608	0.0671557	-0.0569644	0.277833	-0.142477	0.00619093	-7.52722e-05	0.730993	6.50662e-05	0.502076	-1.40036e-05	0.874551	-6.58607e-05	0.753771	4.32462e-05	0.435587	-0.000440205	0.8165	0.0327864	0.430272	0.00894853	0.832603
209	4220097	TCEA2	0.126	0.00372293	0.101261	0.0208513	0.152265	0.0140874	0.0890091	0.140961	0.000135057	0.594132	0.000186389	0.0953308	-0.000121412	0.246531	-4.76878e-05	0.844368	-9.54309e-05	0.139493	-0.00313521	0.156365	0.0109279	0.820874	-0.047302	0.338103
210	5360619	UGT1A6	-0.00767655	0.806508	0.0240851	0.440488	-0.0413798	0.341562	-0.000710653	0.986977	-4.68729e-05	0.797756	-1.48817e-05	0.853864	6.49817e-05	0.372856	-0.000120628	0.489783	4.69604e-05	0.308476	0.00171672	0.277912	0.0111642	0.747387	0.019564	0.579987
211	3780524	ALDH5A1	0.0569396	0.275872	0.0164053	0.755379	0.0548253	0.461839	0.0972712	0.180969	0.0002451	0.421372	4.63077e-05	0.730601	4.94607e-05	0.693687	0.00067954	0.0200087	-0.000136041	0.0796866	-0.00604614	0.0229602	0.026772	0.644662	-0.0134194	0.820882
212	430328	ERAF	-0.199563	0.416874	-0.10538	0.67094	0.579228	0.101522	0.484741	0.155887	-0.00143469	0.316016	0.000185624	0.769845	0.00105019	0.0741416	-0.00098977	0.471852	0.00086894	0.0171071	0.010462	0.401244	-0.123118	0.65275	-0.070749	0.797346
213	6480273	ABCB9	0.0393338	0.332326	0.00836351	0.832721	-0.0518549	0.344389	-0.0352425	0.524094	0.000339899	0.146758	-3.42733e-05	0.743006	-4.57405e-05	0.624903	-9.81369e-05	0.664235	-0.000176903	0.00270872	-0.0004302	0.830298	0.0360301	0.416782	-0.0248532	0.581612
214	2100053	RELA	-0.0763504	0.105192	0.0302025	0.52462	-0.0360617	0.59039	0.00260671	0.968274	-0.000363943	0.185569	-5.55066e-05	0.647041	7.88865e-05	0.487125	0.000129662	0.622551	6.07367e-05	0.385861	0.00738846	0.00207445	-0.0176948	0.735184	0.0249197	0.642151
215	4390646	FOXP4	-0.14346	0.0045405	-0.0214879	0.673056	-0.008204	0.909537	0.026184	0.710121	-2.10459e-05	0.943128	-0.000125305	0.336346	1.98733e-06	0.986798	0.000275446	0.329447	1.30552e-05	0.861708	0.00323806	0.207514	0.0345232	0.539164	-0.0169771	0.765635
216	1740364	GPS2	-0.0243605	0.437739	0.0324746	0.298328	-0.0488619	0.258088	-0.00638406	0.882985	5.02105e-05	0.783675	2.32527e-06	0.977044	8.92514e-05	0.230702	-0.000441404	0.0116374	9.6201e-05	0.0379244	0.00206566	0.193146	0.0498337	0.149187	-0.0546051	0.125897
217	2120397	OCRL	0.0195891	0.639728	0.0275157	0.510144	-0.0177361	0.763935	-0.118112	0.0405921	0.000420869	0.0832111	-2.68427e-05	0.803134	-0.000339131	0.000753197	0.000274533	0.240773	-0.000260173	2.6639e-05	-0.00695882	0.000978752	-0.0155817	0.736257	-0.0104389	0.82449
218	7550368	STARD3	0.0695318	0.044261	0.135076	8.22074e-05	0.0313038	0.512622	0.181558	0.000136364	-0.000184141	0.359184	0.000136937	0.123575	-3.73205e-05	0.649777	-0.00017519	0.363596	-4.981e-05	0.328751	-0.00304854	0.0798074	0.0165052	0.664283	0.028366	0.466994
219	70338	SP110	0.02543	0.677008	-0.117419	0.0542153	-0.0849703	0.316085	-0.090193	0.286812	-3.44585e-05	0.922948	-8.97526e-05	0.567966	1.10343e-05	0.939312	0.000424307	0.212568	9.34842e-05	0.300539	-0.00310761	0.315894	0.1556	0.0210337	-0.00516896	0.940792
220	6510161	SP110	0.0141201	0.723644	-0.0279155	0.484514	-0.0149837	0.79147	-0.0590855	0.283088	0.00016784	0.468987	2.04819e-05	0.842077	-0.000134815	0.161298	0.00045478	0.041855	-7.86631e-05	0.183288	-0.00749621	0.000198457	0.129273	0.00345159	-0.0577647	0.197689
221	5490309	BIRC8	0.0112229	0.698483	-0.00686151	0.807193	0.0171442	0.654985	0.0381756	0.333847	0.000192346	0.251745	-8.97076e-05	0.229418	-9.06237e-05	0.170686	4.23498e-05	0.792581	5.56546e-05	0.184952	-0.00103914	0.467998	-0.00344545	0.91293	-0.0160009	0.620616
222	2000671	DDAH1	-0.010616	0.751901	0.00564498	0.862148	-0.0203058	0.650821	0.0372295	0.413347	-0.000254929	0.187815	1.50796e-06	0.98607	2.75364e-06	0.971728	-0.000109858	0.556697	8.05859e-05	0.098586	0.000945704	0.567325	0.0113605	0.755714	0.00819858	0.825929
223	70189	CUL5	0.00603119	0.872505	0.0183013	0.628229	0.0256093	0.631023	-0.0237341	0.649335	-6.95285e-06	0.974683	-3.78041e-05	0.695806	0.000159353	0.0780092	0.000234444	0.264385	-1.32098e-05	0.812922	-0.00210655	0.270197	-0.0322679	0.438904	-0.0251504	0.555639
224	1660035	TIAM2	-0.0321468	0.275894	-0.0168704	0.557434	0.00549165	0.88841	0.0301343	0.456553	-9.24576e-05	0.589904	-3.30395e-05	0.664206	0.000122844	0.0657464	0.000220823	0.178143	1.83062e-05	0.668258	0.00174578	0.232952	-0.0211872	0.510588	0.0258652	0.433607
225	2650524	FLJ43806	0.0073418	0.806471	-0.0131844	0.658971	0.0292371	0.484918	-0.0540088	0.19238	-9.14004e-05	0.600128	2.21125e-05	0.774424	2.86618e-05	0.68687	4.92091e-05	0.768617	9.68656e-06	0.826748	-0.00139464	0.356589	-0.0122469	0.711384	0.0281199	0.405356
226	1580619	RAB27A	0.0112013	0.716101	-0.0121704	0.681842	-0.0648858	0.110773	0.00593357	0.886937	0.000373183	0.0353441	-6.72547e-05	0.396728	-8.83146e-05	0.204951	0.000118957	0.487519	-4.9763e-05	0.261819	0.000153412	0.919045	-0.0160008	0.632611	-0.0122383	0.719756
227	5570376	JOSD2	-0.127257	0.00507548	-0.0978583	0.0314673	-0.0909599	0.155789	-0.114121	0.0694249	5.17532e-05	0.844737	9.15814e-05	0.43307	-0.000156222	0.152384	-0.000596511	0.0187566	-2.04563e-05	0.761313	-0.000350131	0.879041	-0.0127891	0.799135	-0.0722526	0.159768
228	3830121	IL17	0.0490026	0.084961	0.0369477	0.184427	0.0112055	0.77158	0.0781077	0.044514	-7.42598e-05	0.651335	-3.16198e-05	0.666362	0.000121484	0.0634674	0.000222168	0.161175	3.31195e-05	0.423265	6.8837e-05	0.961048	0.0299565	0.336527	0.0411284	0.193477
229	7560438	DIAPH1	0.102593	0.0046488	0.0405329	0.267288	0.0764398	0.139067	0.131803	0.00892151	1.04843e-05	0.960444	0.000103167	0.268498	-8.61533e-05	0.324803	-0.000622547	0.00213227	9.38623e-05	0.0815447	0.00346403	0.0604036	0.00537557	0.893755	0.0101264	0.805861
230	4040113	KLK10	-0.00328554	0.918205	0.0515745	0.0936634	0.0256596	0.543455	0.0555285	0.198778	4.47672e-05	0.807945	5.116e-05	0.534086	-2.44527e-05	0.738953	7.30199e-05	0.681451	-6.47639e-05	0.161692	9.41712e-05	0.952083	0.0533421	0.123788	-0.0393025	0.267399
231	2750440	AKAP8	-0.0729822	0.0544681	0.0145896	0.702499	-0.0567167	0.294574	0.0126342	0.810419	8.99407e-05	0.684069	9.39868e-05	0.335692	0.000114441	0.211765	-0.000167101	0.431249	2.8025e-05	0.619168	0.000971975	0.613989	0.0600351	0.154014	-0.00715791	0.867749
232	2070279	USH2A	0.0633346	0.0197079	0.0248641	0.353187	0.0837686	0.0257782	0.0528459	0.15468	8.39683e-05	0.593062	9.33001e-05	0.181617	-2.77327e-05	0.66797	-3.50541e-05	0.817206	-4.43122e-05	0.267355	0.000187414	0.89015	-0.00897981	0.763373	0.0362653	0.232348
233	6980735	USH2A	-0.0473175	0.137951	-0.0289904	0.365179	-0.0486773	0.279805	-0.0378609	0.393045	-0.000357093	0.0549442	-5.82032e-05	0.478423	8.59331e-05	0.25875	0.000277978	0.118588	5.91675e-05	0.210815	0.000602367	0.710058	0.0238706	0.499707	0.0338068	0.34999
234	4490201	OR1J2	0.00943779	0.757974	-0.00395623	0.894931	-0.0186176	0.650393	-0.00568709	0.892167	-0.000257891	0.146858	-3.51865e-05	0.655616	8.13233e-05	0.249924	0.000238615	0.161393	5.25753e-05	0.23889	0.00106283	0.485585	-0.0594781	0.0753223	0.0868005	0.0114384
235	7000608	RPS7	-0.23753	2.27674e-07	-0.211288	4.99582e-06	-0.179934	0.00601356	-0.261494	4.25779e-05	0.000554394	0.0384458	-0.000131747	0.264628	-2.33071e-05	0.832928	0.000135075	0.598644	-5.40617e-05	0.428049	0.000552193	0.813188	0.0370684	0.467309	-0.00706565	0.892178
236	1690079	IKIP	0.0614298	0.0924927	-0.0330978	0.362172	-0.0582462	0.249865	0.0225037	0.656755	0.000112225	0.598035	-0.000217643	0.0207789	0.00022118	0.00920478	-6.43988e-05	0.751681	1.71774e-05	0.748922	-0.00231212	0.208856	-0.0159776	0.692094	-0.0260305	0.526456
237	6220168	OR5F1	0.0210983	0.456875	0.0130031	0.635762	0.0712882	0.0586648	0.0639495	0.0964106	9.65096e-05	0.555608	2.24497e-06	0.97544	-6.45906e-05	0.326037	-5.8677e-05	0.709837	-2.69536e-05	0.513591	-0.0012933	0.355185	0.00212356	0.944995	0.0136782	0.664779
238	5670307	PKD1L1	-0.0478452	0.131236	0.0279835	0.375413	0.0622452	0.15828	0.042242	0.336597	-2.67171e-05	0.884995	0.000103666	0.204684	-0.000143294	0.0526312	-6.14261e-05	0.728235	-4.58753e-05	0.325265	-5.1982e-05	0.974047	0.0471262	0.178782	-0.0615005	0.0844386
239	7210725	OXA1L	0.000193278	0.995113	0.0276853	0.384232	-0.0509822	0.255655	-0.0856668	0.0511908	0.000184419	0.316894	-0.000159798	0.0490117	1.76335e-05	0.816658	0.000320008	0.069619	-0.00012966	0.00572785	0.00124924	0.437615	-0.0654102	0.0620042	0.0114775	0.749983
240	5900477	MGC15875	-0.0768034	0.203533	-0.0736463	0.227611	-0.0809515	0.350871	-0.215252	0.0105155	0.000443297	0.208534	0.000174196	0.262662	-0.000276062	0.0579411	-0.000162522	0.630771	-7.483e-05	0.404425	0.000523016	0.864805	-0.0621977	0.354503	0.0112713	0.869077
241	2810747	NPM3	-0.0125404	0.702691	0.0316402	0.321278	0.0138269	0.750699	-0.00726391	0.871165	-0.00018188	0.339338	2.67021e-06	0.974826	9.58475e-05	0.203372	7.44653e-05	0.683432	-1.91014e-06	0.968049	0.000307525	0.849933	0.0336218	0.346467	-0.0276507	0.45114
242	3370100	CDR2	-0.104141	0.094817	0.024267	0.699854	-0.0236813	0.791467	-0.19527	0.0243565	0.000997524	0.00605358	0.000315657	0.0492577	-0.000232243	0.122184	0.000233052	0.504322	-0.000320585	0.000536371	-0.00637795	0.0439855	0.115947	0.0944047	-0.0251387	0.721167
243	360025	ZNF221	-0.00135606	0.955658	0.0129398	0.593357	0.00188567	0.955307	-0.0310987	0.357439	-0.000301235	0.0341626	0.000197102	0.00171196	-2.38456e-05	0.674905	-0.000144469	0.287696	5.8432e-05	0.103166	3.34164e-05	0.978316	-0.0437111	0.104295	0.0109091	0.691961
244	4780093	SLC17A6	-0.0378985	0.207432	-0.0252189	0.388116	0.0754426	0.0619775	0.00894285	0.82671	-0.000341609	0.0488493	9.84043e-05	0.20337	-2.50692e-05	0.718834	5.8304e-05	0.727666	4.29445e-05	0.326069	0.000682807	0.645457	-0.0334852	0.306937	-0.00339542	0.919043
245	3800180	C6orf105	-0.0399368	0.741155	-0.0112422	0.926673	-0.216029	0.213994	-0.105004	0.532922	0.000993273	0.159075	0.000497578	0.110215	-0.000172116	0.553621	0.000248688	0.713271	-0.000235851	0.188951	0.00642422	0.295785	0.211759	0.115419	-0.0864324	0.52649
246	6980082	RPL22	-0.078154	0.0204535	-0.0375204	0.26982	-0.124984	0.00959624	-0.220888	2.46897e-06	0.000436384	0.0264105	-1.38221e-06	0.987293	-8.44452e-05	0.29848	0.000411601	0.0291046	-0.00018568	0.000209963	-0.00510488	0.00289422	0.0420074	0.262236	-0.0486663	0.202181
247	4890360	BLNK	0.0100433	0.883838	-0.133081	0.0537297	-0.0547255	0.577281	-0.158392	0.0954014	0.000517202	0.195305	-0.000136994	0.439029	-0.000359639	0.0302513	0.00182356	2.1634e-06	-0.000232029	0.0227808	-0.00552164	0.112085	0.0487718	0.522396	0.0264612	0.731979
248	6100520	GPR173	-0.0480934	0.131462	-0.00829393	0.793687	0.0267103	0.550786	0.0142961	0.744305	-9.6605e-05	0.601215	6.98989e-05	0.394438	-1.16601e-05	0.87845	-7.76871e-05	0.662943	-3.5264e-05	0.453567	-0.00056542	0.724194	-0.0254673	0.469338	0.0213838	0.54941
249	4730750	TBC1D7	0.154748	0.0926181	0.374503	5.54571e-05	0.116256	0.378944	0.338777	0.00812987	-0.00110649	0.0391301	-0.000133779	0.572287	0.000213477	0.335962	0.000239972	0.641332	4.98777e-05	0.71521	-0.000146447	0.975006	-0.0102455	0.920229	-0.0580095	0.577046
250	2850368	TMC4	0.02289	0.461004	0.0202607	0.507367	0.0884605	0.036312	0.0458536	0.282258	0.000168398	0.350238	2.77832e-05	0.728245	-0.000153087	0.0344856	-0.000282412	0.102495	6.29825e-05	0.166022	-0.000565814	0.715471	0.0152375	0.654409	-0.0551496	0.113518
251	3060474	FA2H	-0.0342756	0.174047	-0.0565008	0.0197644	-0.0497455	0.134992	-0.0380971	0.263137	-0.000180214	0.214386	-3.17505e-05	0.624343	6.87019e-05	0.235537	-2.4208e-05	0.862907	9.08648e-06	0.803365	-0.000607303	0.622923	-0.0154757	0.570902	0.0286362	0.305225
252	2100026	ZNF20	0.0736442	0.116255	-0.0833301	0.0749307	-0.119594	0.0706646	0.0631574	0.328557	0.000100717	0.711237	-0.000215475	0.0744992	-1.14564e-05	0.918388	-0.000215718	0.41055	0.000260722	0.000165228	0.000819242	0.728568	0.00693698	0.893613	-0.0876772	0.0949921
253	1710482	FAM18B2	0.0786763	0.0122667	0.076645	0.0125069	0.0778145	0.0650834	0.129897	0.00247099	-8.48187e-05	0.641267	0.000123175	0.127684	-7.74609e-05	0.288721	-5.05242e-05	0.772565	2.46001e-05	0.59165	0.0025055	0.108625	-0.0341909	0.318302	-0.00227355	0.948445
254	6760372	KIAA1524	0.098393	0.0122944	0.0303464	0.438219	-0.0360912	0.511775	0.0451498	0.404658	0.000360468	0.114309	-6.63809e-05	0.511506	7.55845e-05	0.421081	0.000363674	0.0975958	-9.92058e-05	0.0876912	0.000821398	0.678466	-0.053012	0.221613	0.0618544	0.162281
255	630220	RICS	-0.0304683	0.59221	-0.121383	0.0334457	-0.136508	0.0925322	-0.136285	0.0830646	0.00012381	0.707944	-1.79345e-05	0.902609	-0.000124295	0.363651	0.000482143	0.129924	-0.00022239	0.00830298	-0.00577387	0.0446293	-0.0176284	0.779964	0.061577	0.334911
256	1570670	CROP	0.0189779	0.503465	0.00457325	0.870521	-0.060849	0.116919	-0.0197135	0.614421	-0.000132668	0.421646	6.39827e-05	0.381227	0.000100865	0.127754	-0.000127065	0.421295	7.10023e-06	0.864596	0.000740099	0.603499	0.0141006	0.65113	0.00160598	0.959943
257	1940750	DPAGT1	-0.0276915	0.69131	-0.178757	0.0110061	-0.199285	0.0468191	-0.161225	0.095794	0.000589424	0.146409	5.66657e-05	0.7526	-0.000374196	0.0257162	-0.000522926	0.180551	-0.000103253	0.318347	-0.0036837	0.297333	0.0394057	0.611376	-0.0226	0.773142
258	1990347	DPAGT1	0.00059256	0.992366	-0.0915342	0.141109	-0.0156255	0.859515	-0.151086	0.0779962	0.000167828	0.641211	-6.09293e-05	0.702243	8.85546e-06	0.952758	0.00024136	0.486172	-6.18645e-05	0.500818	0.00265729	0.396835	-0.0207402	0.762669	0.0252273	0.717929
259	1030747	FBXO25	-0.00389598	0.884709	0.0617959	0.0183135	0.0308314	0.387032	0.0266081	0.468546	2.65008e-05	0.865078	8.27364e-05	0.231825	-6.47867e-05	0.297376	-0.000147072	0.32456	-7.87457e-05	0.0443144	0.0011656	0.382919	-0.00379861	0.896515	-0.0142104	0.63744
260	5720301	C14orf11	-0.100784	0.000999679	-0.0866859	0.00404056	-0.114547	0.00669738	-0.159912	0.000132233	0.000290003	0.10157	-0.00013243	0.0926693	0.000145591	0.0454313	9.05468e-05	0.596386	-4.69072e-06	0.917004	0.00188136	0.21833	0.000412121	0.990215	-0.0171265	0.616745
261	1430711	PTGER3	0.000375538	0.989782	-0.00413829	0.886461	0.0256926	0.524062	-0.0351704	0.382992	-0.000103914	0.541562	4.508e-06	0.952376	-2.12182e-05	0.758607	1.19503e-05	0.941735	2.41424e-05	0.575379	-0.00263544	0.0730538	0.0347763	0.28047	-0.0412016	0.211011
262	1580368	COL6A3	-0.078789	0.102462	-0.0602176	0.212473	-0.0903741	0.187262	-0.0672855	0.312344	0.000283282	0.311931	2.04535e-05	0.869288	-4.71706e-05	0.683845	0.000428947	0.112049	-4.10276e-05	0.565484	-0.000653092	0.78855	-0.0680344	0.203107	-0.0148366	0.784014
263	10082	RNF149	0.25126	1.98445e-07	0.0621802	0.201919	0.0988431	0.153227	0.0729359	0.277495	-0.000416484	0.139083	-3.2557e-05	0.793454	5.33746e-05	0.646943	-0.000346185	0.200393	8.37208e-05	0.243484	-0.000896154	0.715033	0.0125846	0.814668	-0.0176846	0.746279
264	1980164	TNFSF11	-0.00293704	0.927815	-0.00535817	0.866306	-0.0426558	0.337703	0.0341016	0.440567	5.1949e-05	0.781593	-2.53396e-05	0.761124	-1.68428e-05	0.826455	5.15424e-05	0.775693	2.77321e-05	0.560014	-0.000596645	0.711706	-0.00656345	0.853377	0.0694266	0.0550565
265	4590180	TNFSF11	-0.0278371	0.345388	0.0278488	0.338667	0.0682008	0.0918298	0.00349656	0.931183	-0.000374484	0.0286586	2.51941e-05	0.73999	5.56351e-06	0.936239	5.11004e-05	0.756038	-1.04019e-05	0.810368	-2.53471e-05	0.986311	-0.0214341	0.507906	-0.024064	0.467567
266	6420692	RSBN1L	0.23005	2.34215e-06	0.164324	0.000809073	0.105349	0.127898	0.177984	0.0085836	-0.000348501	0.22005	-0.000180848	0.149032	0.000222036	0.0587064	0.000649242	0.0171386	7.34856e-05	0.310231	-0.00176377	0.476932	0.0196414	0.7164	-0.0670414	0.226606
267	6510484	CDA08	0.0332531	0.423848	0.0139809	0.736313	-0.0155479	0.791668	-0.0758064	0.185465	-9.25321e-05	0.701302	-0.000121199	0.257305	-8.59468e-05	0.391434	0.000358018	0.123863	-2.82666e-05	0.646003	-8.20457e-05	0.968776	0.0142998	0.755814	-0.0691159	0.13889
268	2510546	FLJ26443	0.00633844	0.82051	-0.0212365	0.432946	-0.0433762	0.240761	-0.0191071	0.616019	-0.000156842	0.332091	2.13225e-05	0.767199	0.000137647	0.0294034	-0.000131188	0.398387	0.000115993	0.00403726	0.00222127	0.106936	0.0206192	0.497919	-0.07208	0.0204831
269	5270315	CCNT1	0.0896013	0.317458	0.0064872	0.942003	-0.125877	0.316539	0.0453653	0.713139	0.000222444	0.668635	0.000155313	0.501286	-0.000153356	0.470639	-0.000625127	0.211959	-6.39485e-05	0.628114	-0.000882299	0.844608	0.0553958	0.575795	0.106513	0.288046
270	6840097	OR2T8	0.0512675	0.0985608	0.0414409	0.165026	0.0617791	0.131573	0.0880413	0.0357325	-0.000275271	0.123377	6.04296e-05	0.449035	-4.60993e-05	0.516939	0.000119065	0.490224	7.64042e-05	0.0887094	-1.47252e-06	0.999227	-0.00930059	0.782101	-0.0455187	0.185467
271	430376	CLDN18	-0.0112097	0.716956	-0.0128321	0.674456	-0.00680093	0.87344	0.00261528	0.9509	0.000170164	0.34218	-3.89583e-05	0.624895	-1.24305e-05	0.863597	4.5707e-05	0.791074	-2.17928e-05	0.630612	0.00350937	0.0231393	0.00840173	0.804995	-0.0571963	0.0976673
272	3170255	AK3L2	0.180058	0.00362632	0.343048	3.63043e-08	0.13986	0.112683	0.221503	0.010007	-0.000951853	0.00832301	-0.000101526	0.524012	0.000117037	0.430964	0.000831152	0.0163151	6.2149e-05	0.498775	0.00460699	0.14281	-0.00595401	0.930957	0.00678289	0.92282
273	4050059	C6orf163	-0.0170302	0.556627	-0.0096469	0.72929	0.0104348	0.785024	0.0134372	0.731473	0.000170847	0.30564	7.44883e-05	0.317604	-8.31254e-06	0.900159	-0.000194678	0.226872	3.99023e-05	0.340557	-0.00215901	0.128206	0.0201373	0.521394	0.0249438	0.436962
274	2850722	C1orf84	0.0367096	0.254151	-0.0187895	0.549849	-0.0804752	0.062165	-0.0476605	0.278393	1.22122e-06	0.994777	-8.71659e-05	0.292893	9.03442e-05	0.225986	-6.93949e-05	0.698422	-9.55903e-06	0.838643	0.00062674	0.695098	0.0234849	0.503411	-0.0280089	0.436751
275	1070070	NGFRAP1L1	-0.006857	0.895467	-0.0587438	0.262952	-0.100302	0.176282	-0.0674912	0.352885	0.00047128	0.121683	-0.000140498	0.296105	8.16154e-06	0.947542	0.000160734	0.581349	8.05548e-05	0.297627	0.00561446	0.0341728	0.107709	0.0631687	0.0591843	0.315151
276	1470719	SERPINA1	0.119881	0.050381	0.262602	2.00591e-05	0.273308	0.00182227	0.211735	0.0125397	-0.00050434	0.156751	0.000326434	0.0387197	-0.000214548	0.145351	-3.06225e-05	0.928852	-0.000126777	0.162619	0.000895588	0.772654	-0.0797736	0.240973	0.0647155	0.346774
277	2060017	LRRC52	0.0127907	0.675405	0.0127799	0.670617	-0.0120793	0.769802	-0.0522721	0.214727	7.15806e-05	0.687386	-2.33264e-05	0.767151	7.26754e-06	0.9172	3.26869e-05	0.8475	-5.44226e-05	0.221607	0.00104955	0.491732	-0.0111587	0.739283	0.00196161	0.954408
278	2640168	CCRL2	-0.0280043	0.425485	0.0571187	0.0939572	0.0250038	0.596458	0.0292347	0.539509	0.000121358	0.549252	0.000130875	0.147346	-0.000120603	0.141693	-0.000114759	0.557565	3.61009e-05	0.481063	-0.000312796	0.856887	0.0844234	0.0272818	-0.0549904	0.159196
279	1110053	POU2F2	-0.0126292	0.861991	-0.224742	0.00217283	-0.0375224	0.719579	-0.00415563	0.96717	0.00101211	0.0167384	-2.28958e-05	0.902693	-0.000483081	0.00566102	0.000743509	0.0675909	-0.000490114	5.46886e-06	-0.00260685	0.479258	-0.0872252	0.280465	0.0831932	0.308731
280	2650497	CTNNBL1	-0.0215028	0.49935	-0.0348255	0.272733	-0.09055	0.0415555	-0.0205172	0.641968	4.51323e-06	0.980587	0.000139483	0.0889804	-0.000201045	0.00728124	-0.0003411	0.0547345	9.29847e-05	0.0476513	-0.000637158	0.691929	0.0489941	0.163938	-0.00271354	0.939746
281	2260484	ABC1	-0.165567	8.93004e-05	-0.11686	0.00594446	-0.106273	0.0758674	0.0664876	0.257447	0.000419283	0.0888465	-8.87952e-05	0.41413	-4.42091e-05	0.663045	-0.000201244	0.394048	2.05802e-05	0.742896	-0.000417564	0.845903	0.101341	0.0306041	-0.066217	0.167743
282	5720128	PPIL4	-0.0634597	0.0254477	-0.021653	0.428644	-0.0328832	0.380694	0.0108067	0.778423	-8.06326e-05	0.622358	7.20372e-05	0.323892	-5.22795e-05	0.424247	-0.000292434	0.0639685	2.00994e-05	0.625446	-0.00175074	0.209288	0.0501072	0.103325	-0.0429877	0.172605
283	6330047	KIRREL2	-0.00388708	0.887485	0.00733294	0.781335	0.0233492	0.519661	-0.0178654	0.630166	0.000150261	0.342044	7.67619e-06	0.913482	-9.67549e-05	0.124747	-0.000196404	0.198526	-7.71315e-05	0.0522946	0.000433445	0.747381	-0.00579841	0.845521	-0.0122336	0.687671
284	3890056	NEK11	0.0186182	0.47261	0.0265195	0.295827	0.0228486	0.506882	-0.00828773	0.816493	5.555e-05	0.71333	4.21506e-05	0.528639	-1.69169e-05	0.772953	0.00019831	0.168595	-4.93632e-05	0.189194	-0.00011195	0.930916	-0.0136699	0.629644	0.033273	0.253933
285	4220537	MAPRE3	0.0291804	0.458043	0.0171452	0.662718	-0.0849459	0.122449	0.0295555	0.587309	-4.88576e-05	0.831104	2.80223e-05	0.781833	-9.47751e-05	0.312587	7.90668e-05	0.71867	-1.75907e-05	0.762547	0.000473299	0.812234	-0.0417046	0.337241	-0.0191929	0.667025
286	7550411	UBE3B	-0.0309747	0.438721	-0.0700998	0.0806643	-0.116275	0.0394717	-0.0569425	0.305201	-0.000213897	0.358997	0.000144198	0.161342	-0.00010149	0.288388	-0.000313149	0.161001	3.65963e-06	0.950792	-0.00326951	0.10737	0.0603316	0.173526	0.0222761	0.623212
287	3440754	TGM3	0.163954	0.385356	0.0884515	0.6426	-0.00913205	0.973208	0.383404	0.144054	-0.000357706	0.74491	0.000174206	0.720785	-6.28141e-05	0.889555	-0.00203727	0.053994	-0.000309432	0.26923	-0.00837422	0.38185	0.490468	0.0196534	-0.00778913	0.970665
288	6480019	MGC70863	-0.0284604	0.597447	-0.0678679	0.212501	0.0470122	0.543015	-0.168727	0.0246153	0.000140255	0.655659	-5.52894e-05	0.690249	-8.68758e-05	0.503299	0.000138558	0.645872	-3.58442e-05	0.654489	0.00127724	0.641443	-0.0342933	0.567194	0.0160304	0.792946
289	5810746	LOC158318	0.00105797	0.971573	-0.000884961	0.97528	-0.0266038	0.497279	0.0361325	0.367749	7.81901e-05	0.647309	-3.60197e-05	0.637185	2.9654e-05	0.662595	-0.000158097	0.338227	-1.76461e-05	0.680957	0.00161235	0.267576	-0.0176517	0.583277	0.00662678	0.840293
290	1820608	DCUN1D2	0.0717737	0.102891	0.0459008	0.298603	0.126752	0.0406292	0.150424	0.0139452	0.000112153	0.662391	-3.36139e-05	0.766644	1.07452e-05	0.918455	-0.000353982	0.149537	-3.60399e-05	0.580683	-0.000404114	0.856706	-0.0601756	0.217291	-0.0230912	0.644796
291	3520156	CHRNA2	0.03765	0.273418	0.0582039	0.0825214	0.0166924	0.714291	-0.00199225	0.966324	3.06813e-05	0.878066	2.61629e-05	0.767987	4.52533e-06	0.953595	4.85857e-05	0.799279	1.79483e-05	0.718444	-0.000107196	0.949908	0.00294103	0.937536	0.0240735	0.531945
292	5900719	NOC2L	-0.0201305	0.61022	0.0672411	0.0899968	0.0666248	0.231812	0.222383	5.05589e-05	-0.000208914	0.364476	9.81132e-05	0.334276	-1.87142e-05	0.843186	-0.000233653	0.289387	-5.60912e-05	0.338493	-0.000952824	0.635185	-0.0149586	0.732559	0.0436085	0.331748
293	7550349	SPAG5	0.14996	0.0577438	0.327706	3.78431e-05	0.248762	0.027839	0.36894	0.000769893	-0.000256744	0.576496	-0.000103625	0.611442	0.000253709	0.177508	0.000173618	0.694499	-0.000171716	0.141999	0.00280431	0.483128	-0.028535	0.745356	0.0290277	0.742843
294	1450400	CHI3L2	-0.0806259	0.46781	-0.125883	0.260573	0.0178271	0.910819	-0.231434	0.13386	0.000648316	0.31605	0.000336326	0.240592	-0.000515654	0.0511383	-0.000231948	0.708807	3.89215e-05	0.812954	-0.00963329	0.0869755	-0.0116135	0.925103	0.0960146	0.440512
295	5080750	PRSS16	0.0321687	0.368693	-0.0336331	0.348156	-0.0479644	0.341586	-0.0456717	0.358634	-0.000236124	0.257934	-5.35101e-05	0.561781	7.21005e-05	0.393025	0.000219269	0.272272	4.77109e-05	0.367048	0.00412438	0.0228983	0.0282646	0.476288	0.00903955	0.822735
296	6180228	C1orf189	0.0150253	0.635444	-0.000988709	0.974625	-0.0240172	0.578034	-0.0558096	0.198106	-1.27389e-05	0.944555	9.52426e-05	0.243807	2.21094e-06	0.975876	-0.00030718	0.0821528	3.50799e-05	0.447126	0.000360765	0.818584	-0.00800454	0.817922	-0.00353502	0.920136
297	6560161	POLA	-0.00512353	0.907619	0.0329135	0.453782	0.114967	0.0597886	0.0293506	0.630299	-0.000272569	0.288937	0.00010412	0.359496	2.06224e-05	0.844148	-4.49252e-06	0.985443	1.15889e-05	0.858951	-0.00138686	0.534113	-0.0112231	0.817505	0.0145743	0.770876
298	5560703	TAS2R50	0.0197432	0.440943	0.012201	0.624758	0.0389434	0.25152	0.0560691	0.110267	0.000119154	0.423433	-4.05986e-05	0.538994	1.69314e-06	0.976694	6.67026e-05	0.639533	2.97168e-06	0.936115	0.00179117	0.158292	-0.0489089	0.0801437	0.0419028	0.143644
299	50309	ZNF41	0.0390943	0.136591	0.075441	0.00314605	0.0515814	0.138404	0.00268907	0.940201	2.16053e-05	0.887201	-4.93525e-05	0.465617	9.61596e-05	0.111495	-0.000130327	0.371875	2.60228e-05	0.495497	0.00154978	0.23396	-0.0137559	0.629946	0.00308304	0.916465
300	6280398	ZNF41	-0.0174857	0.498918	-0.00851858	0.732237	0.0364912	0.285265	-0.0393097	0.260791	-2.44383e-05	0.86974	-6.94773e-05	0.296051	-5.148e-06	0.931105	-0.000179667	0.211355	-1.26611e-05	0.735503	0.000933407	0.462003	-0.0168668	0.547012	-0.0210176	0.463761
301	3170554	BAGE	0.00296133	0.913392	0.00757529	0.772363	0.0373727	0.298436	-0.00268241	0.941863	-0.000111926	0.47517	1.57825e-05	0.821694	2.45829e-05	0.693633	-0.000202675	0.180663	0.000112798	0.00417582	0.00294699	0.0271344	-0.021887	0.458143	-0.0167324	0.579026
302	4760451	CDH8	0.0344817	0.185987	-0.0390586	0.120006	-0.0339042	0.324878	0.0277661	0.431653	2.29268e-06	0.987814	-5.05391e-05	0.451722	-2.30229e-05	0.696873	-0.000250623	0.0839744	1.77033e-05	0.637465	-0.00211225	0.098273	0.0178903	0.527557	-0.00429519	0.881752
303	5220187	FAF1	0.00586329	0.858417	0.0512118	0.121528	-0.0511744	0.273371	-0.0511694	0.262173	0.000258334	0.177427	3.01268e-05	0.721569	-3.5541e-05	0.654041	-9.03172e-05	0.623121	-1.95064e-05	0.689609	0.000290535	0.861943	-0.000735795	0.9839	-0.00482608	0.897115
304	2570091	IL18BP	-0.0157587	0.583009	0.0149212	0.594109	0.00205929	0.956869	0.0240681	0.541447	1.88814e-05	0.909995	2.39564e-05	0.74632	4.66136e-05	0.472837	-0.000170339	0.285666	-8.40749e-06	0.839736	-0.00106793	0.453681	0.0175577	0.575337	0.0113027	0.725345
305	7100255	IL18BP	0.00970438	0.741021	0.00782075	0.785393	0.0284877	0.464985	0.0837306	0.0383854	-0.000335879	0.049793	0.000138453	0.0676667	-4.69539e-05	0.4796	-8.45767e-05	0.60422	1.79333e-05	0.673622	-0.000268527	0.854279	-0.0559325	0.081454	0.0241086	0.465283
306	2360189	ARL6	-0.0227948	0.460139	-0.00499761	0.868553	0.033998	0.416766	0.13313	0.00159481	-0.000106744	0.549317	5.89057e-05	0.459082	-7.38529e-05	0.298295	0.000221264	0.198348	-9.59185e-06	0.830717	-0.00134426	0.379301	-0.00337755	0.920436	0.0180227	0.599404
307	3800221	ARL6	0.00313858	0.910461	-0.0163051	0.549408	-0.00421983	0.909267	0.00333173	0.930741	0.000293487	0.0708026	-0.000142301	0.0481119	-2.22069e-05	0.725256	0.000200875	0.195315	-5.58995e-05	0.166872	0.00430659	0.0018957	-0.0337065	0.268693	0.00113796	0.970997
308	670465	UNC13B	-0.0409613	0.175845	-0.0618081	0.0338167	0.00992213	0.804422	-0.0647674	0.1129	-3.40991e-05	0.844837	-0.000102066	0.189342	-1.07897e-05	0.877484	-9.57405e-05	0.569374	-3.71658e-05	0.397355	0.00120378	0.417343	0.0211909	0.517925	0.021347	0.524476
309	2600520	MBP	0.108345	0.0647652	0.0110969	0.851259	0.0921369	0.273674	0.131328	0.10725	-0.000484369	0.156433	-0.00017706	0.24105	0.000291641	0.0393023	-2.24847e-05	0.945415	0.000360385	3.54185e-05	0.00428075	0.150656	-0.0200228	0.758787	0.0322436	0.626608
310	4250092	WHSC1	-0.0319088	0.322746	0.0521068	0.0977079	0.0354554	0.407556	-0.0647616	0.141855	0.000206172	0.271065	-0.00011545	0.164765	4.56831e-05	0.540976	-6.59925e-05	0.71283	-5.59196e-05	0.234528	0.00120452	0.452915	0.0773718	0.0273873	-0.0572652	0.113894
311	5670259	CCL19	-0.033133	0.250418	-0.00242495	0.931253	-0.0251838	0.518147	0.0131431	0.737684	-0.000298361	0.072967	6.11228e-05	0.410076	1.88727e-05	0.778054	0.000132458	0.409581	5.37098e-05	0.200962	-0.00071284	0.617252	0.0203065	0.518982	-0.00384849	0.904462
312	160397	MBNL1	0.0253214	0.524978	0.0267609	0.504028	-0.0591663	0.292587	-0.0281979	0.610525	-0.000160092	0.491005	0.000183302	0.0736478	2.12547e-07	0.998229	0.000322124	0.147652	4.45329e-05	0.451696	-0.000225579	0.911471	0.00101455	0.981672	0.00327319	0.942609
313	5390408	MBNL1	0.079189	0.0280896	0.0791748	0.0267028	0.027892	0.574412	0.0742666	0.134607	-8.53184e-05	0.683882	1.00832e-05	0.913463	8.19964e-06	0.923547	0.000247549	0.218268	-3.05511e-06	0.954156	0.00337943	0.0624476	0.00527598	0.894108	-0.0147442	0.717003
314	1690634	COG5	0.129628	0.0386002	-0.0522977	0.406865	-0.056242	0.527627	-0.0917243	0.293159	0.000333488	0.361912	0.000192948	0.231857	-0.00022449	0.133196	-9.79404e-05	0.779639	-0.000198471	0.0327737	0.00400369	0.209052	-0.0714787	0.304477	0.152815	0.0313376
315	4920463	COG5	0.116918	0.0518212	-0.00967828	0.872552	0.0432874	0.613509	-0.0422897	0.610963	0.000325592	0.351459	4.38348e-05	0.777012	-0.000211035	0.145756	0.000277508	0.409585	-9.25349e-05	0.299323	0.000634831	0.834663	0.0315142	0.636413	0.0144917	0.83045
316	2190544	EPHA3	-0.0670935	0.0512461	-0.0703025	0.035448	-0.0500087	0.272719	-0.150074	0.00137952	5.7403e-05	0.773465	6.01213e-06	0.945917	7.30362e-05	0.355879	-0.000331216	0.083352	-5.3601e-05	0.283652	0.000242096	0.886988	-0.0148514	0.691295	0.0215273	0.57565
317	6060010	EPHA3	-0.0193946	0.54045	0.0268818	0.386423	-0.0315447	0.453735	0.0120858	0.780939	-9.38836e-06	0.959392	-0.000118271	0.147488	0.000125645	0.0873998	-1.35555e-05	0.938617	-5.20183e-05	0.260943	-3.09782e-05	0.984394	0.0324038	0.347541	-0.0373328	0.296429
318	2940035	GPX1	-0.182442	0.0197369	-0.152503	0.0537246	-0.0810424	0.471294	-0.180004	0.0984869	-0.000342224	0.453373	-6.76749e-05	0.737061	-0.000249707	0.185098	3.75182e-05	0.931762	-3.64277e-05	0.753977	0.00347216	0.382527	-0.0954472	0.272828	-0.0198699	0.822168
319	7570475	GPX1	-0.224787	0.00207884	-0.164235	0.0255921	-0.198736	0.0569855	-0.272699	0.00721605	0.000166282	0.695957	-0.000143171	0.446321	-0.000364742	0.0376776	-0.000694741	0.0889017	-0.000139966	0.196682	-0.00602938	0.104015	0.0527863	0.515273	-0.074476	0.366611
320	6250075	PPP2R3A	0.0339309	0.19999	0.0453896	0.0865351	0.030903	0.404471	0.102024	0.00541366	-0.000413984	0.00728298	4.9585e-05	0.466742	-1.63278e-05	0.796165	0.000287265	0.0519217	-2.37367e-05	0.544932	-0.000877544	0.513217	-0.0506564	0.0835389	0.060241	0.0449682
321	130608	LMX1A	-0.0462938	0.124118	-0.00618522	0.830801	-0.0555538	0.162111	-0.0829451	0.0413358	0.000139157	0.421983	-2.32158e-05	0.764275	-4.22581e-05	0.54076	-1.51057e-05	0.928094	-7.98086e-05	0.0669095	-0.000802422	0.58634	0.0287905	0.377299	-0.0244644	0.463164
322	5690441	SLC4A1	-0.167501	0.164513	-0.0836595	0.490921	0.335915	0.052158	0.156491	0.349725	-0.000487185	0.487193	-2.21632e-06	0.994314	0.000380507	0.18619	-4.91492e-05	0.941889	0.000368323	0.0390975	0.00064052	0.916446	0.0952666	0.477326	-0.0821712	0.542766
323	3840041	LAT	0.00641615	0.836702	-0.00104644	0.972351	-0.0812308	0.048753	0.0113338	0.789095	-4.32779e-05	0.81021	-6.08863e-05	0.447396	-7.86582e-05	0.272071	-7.23651e-05	0.675751	-1.10614e-05	0.806718	-0.000106112	0.945021	0.0374525	0.267894	-0.0363537	0.2954
324	1940327	TCEA2	-0.0150563	0.598866	0.00244148	0.93028	0.0497736	0.189839	0.0130381	0.739677	0.000183449	0.270262	6.71067e-05	0.36324	-0.000127866	0.0494946	0.000195776	0.21844	-1.07932e-05	0.794828	0.000680229	0.632151	-0.034706	0.266154	0.0159392	0.619256
325	5720377	TREX2	0.0336268	0.304855	0.0187561	0.563706	0.00814646	0.857022	-0.0568138	0.208745	0.000286301	0.132971	-6.54948e-05	0.437711	7.55742e-05	0.326614	0.00012223	0.503544	-3.93217e-05	0.414691	0.00190541	0.247486	0.0289518	0.422314	-0.0404719	0.272595
326	670722	ARTS-1	0.051248	0.233178	-0.0320909	0.454712	0.0375813	0.530556	-0.017138	0.773537	-0.00025762	0.303833	0.000203424	0.0659995	-2.99857e-05	0.768968	-1.74067e-05	0.942135	-6.42239e-05	0.31231	-0.00207164	0.341328	-0.0228261	0.630791	0.00825522	0.865564
327	2360148	ABCE1	-0.0437362	0.353849	-0.00980455	0.837055	-0.101435	0.133876	-0.0626314	0.340462	-8.74409e-05	0.750801	-1.91167e-05	0.874851	0.000269829	0.0179274	0.000586493	0.0263401	-0.00013313	0.0576892	-0.00253067	0.291912	0.0148383	0.777239	0.0288839	0.589712
328	2940097	SYN3	0.042632	0.174561	0.00333019	0.91388	0.0337713	0.420105	-0.0264356	0.541665	-1.4999e-06	0.993468	-6.98203e-05	0.388849	1.47459e-05	0.83597	0.000144497	0.407703	-8.06362e-06	0.859687	0.000572087	0.715044	-0.0298968	0.384602	0.0198829	0.573911
329	3420070	POLQ	0.0761691	0.0870935	0.0040972	0.926439	0.0376199	0.547356	0.02789	0.650035	0.000392201	0.128931	-0.000327618	0.00434173	0.000141642	0.17609	0.000226108	0.363318	-0.000130669	0.0459914	0.0014092	0.528582	-0.018534	0.706718	0.0800485	0.107426
330	1570669	CHIT1	-0.0271112	0.367116	-0.00269973	0.925835	0.00498482	0.90015	0.0122717	0.763038	-0.000207186	0.23233	4.44755e-06	0.954118	0.000129677	0.0616504	-6.23784e-05	0.708895	-3.32144e-05	0.446564	0.00105246	0.476619	-0.0372087	0.25322	0.0627645	0.0603165
331	2750129	NFYA	-0.0383056	0.321751	-0.026095	0.500256	-0.0305911	0.574912	-0.00704385	0.895209	-0.000151357	0.500939	-1.77021e-05	0.858708	1.65605e-05	0.858629	4.28695e-05	0.842727	9.07651e-05	0.113337	-0.00101178	0.605272	0.0419021	0.327273	0.064121	0.142571
332	2710170	C3orf24	-0.00948612	0.734545	-0.0399709	0.140016	-0.0200319	0.588403	0.0531857	0.16219	-0.000185626	0.251208	-9.98063e-06	0.889818	5.77661e-05	0.36619	0.000193184	0.214183	4.45472e-05	0.271519	0.000227501	0.868995	-0.0166931	0.582872	0.0227223	0.465726
333	990048	UQCR	-0.058848	0.142779	-0.101829	0.0112219	-0.159672	0.00451903	-0.0369	0.507731	0.000275175	0.239841	-0.000218825	0.0342947	0.000168093	0.0777078	-0.000202187	0.366872	-6.86841e-08	0.999077	0.00538397	0.00814785	-0.0571922	0.198016	-0.00787276	0.862609
334	2100114	SH3GLB1	-0.0125295	0.780688	0.00279916	0.950096	-0.0393226	0.52586	0.0191831	0.758326	-0.00043801	0.0951939	-4.44102e-05	0.701698	0.000104546	0.32031	0.000113614	0.650418	0.000132653	0.0451233	0.00209343	0.356626	-0.0420005	0.397393	0.0114562	0.822039
335	1820021	VARS	0.0516874	0.248806	0.0390793	0.382634	0.0308331	0.627246	0.0403025	0.513669	0.000335386	0.197131	0.000153763	0.182441	-0.000165598	0.125875	0.000187858	0.453896	-0.000153559	0.0206365	-0.00261837	0.246523	0.00499616	0.919719	-0.00672082	0.893795
336	7320487	VARS	0.00800933	0.804482	-0.000191869	0.99522	-0.0808609	0.0712705	-0.00798148	0.857647	0.000195834	0.296011	-3.87959e-05	0.642012	-1.29904e-05	0.863291	-9.98311e-05	0.580423	-5.03421e-05	0.287999	0.00060183	0.70968	-0.0104064	0.770464	-0.012176	0.735724
337	2710451	OSRF	0.0832097	0.104382	-0.016025	0.755215	-0.154564	0.0317626	0.00886356	0.900958	-0.000211706	0.479055	-0.000212814	0.106591	0.000384217	0.00166704	0.000264863	0.354327	0.00014951	0.0490408	0.00250841	0.33577	-0.0168388	0.766766	0.0452236	0.438457
338	3780022	RASGRP2	0.0711119	0.105272	0.164723	0.000186243	0.0540483	0.389163	-0.0513861	0.397042	-5.59856e-05	0.826279	0.000414439	0.000246665	-0.000336338	0.00152241	0.000400885	0.103004	-0.00017487	0.00722313	-0.00657852	0.0030423	0.0350778	0.471394	0.0331394	0.501965
339	2900538	GBAS	-0.0957241	0.0645861	-0.0682226	0.192243	-0.140864	0.0573007	-0.111671	0.121546	-9.5087e-06	0.974909	-7.0714e-05	0.595565	2.12604e-05	0.86522	0.000377703	0.192452	-2.0982e-05	0.78537	-0.000644338	0.8071	-0.045149	0.432876	0.0175989	0.765314
340	3140014	LOC124842	-0.0337621	0.289427	-0.0341217	0.281712	-0.026395	0.5494	-0.0231837	0.600155	-0.000193668	0.297583	8.55272e-05	0.297897	-2.0992e-05	0.776652	9.83152e-05	0.579813	5.75076e-05	0.219466	-6.15188e-05	0.969456	0.0611421	0.0824965	-0.052445	0.144301
341	1500176	OR2D2	0.0170554	0.58828	0.0162083	0.599576	-0.0134469	0.754475	0.00919401	0.830642	1.07191e-05	0.953047	-1.42086e-05	0.860901	4.24488e-05	0.56504	6.87553e-05	0.695541	-7.60664e-05	0.0986995	0.000483856	0.757209	0.000255126	0.9941	0.0856284	0.0147209
342	1400541	DKFZP686A10121	0.00577249	0.864424	0.0284197	0.400519	-0.0480148	0.310467	0.0231227	0.622493	-0.000205642	0.297129	-1.03938e-05	0.905001	0.000142452	0.0739053	6.01481e-05	0.749763	8.26613e-05	0.0979026	-0.000130433	0.939285	0.0439012	0.240891	-0.0393069	0.303955
343	1400114	PTPN21	0.0416424	0.186185	-0.0207928	0.502225	0.0044766	0.916376	-0.0115194	0.790799	-0.000142419	0.437234	1.55231e-05	0.848458	-2.01264e-05	0.780379	2.25011e-05	0.897882	3.06338e-05	0.504771	-0.000399004	0.799837	-0.075032	0.0300256	0.0355305	0.314824
344	1820450	ZNF222	0.0577835	0.122226	-0.0218753	0.558333	-0.0325309	0.533506	0.107454	0.0379743	-0.000329198	0.130733	-6.94087e-05	0.470655	0.000193237	0.0303184	-0.000318348	0.1271	0.000128261	0.0205023	0.00158648	0.402445	-0.00398606	0.923141	0.0337623	0.426336
345	840184	SFRS14	0.134557	0.0301285	0.109528	0.0805382	0.187925	0.0351601	0.17006	0.0489079	-0.000239481	0.508019	0.000226265	0.156848	6.27695e-05	0.674572	-0.000137577	0.692156	8.60386e-06	0.925624	-0.00141381	0.653722	-0.0871982	0.206401	0.118421	0.0910925
346	6110255	SFRS14	0.0713528	0.0999783	0.0879853	0.0435239	0.0151483	0.807202	0.0506053	0.398993	-0.000124058	0.62266	-6.97336e-05	0.53261	4.42172e-05	0.672644	-0.000121127	0.618019	3.06875e-06	0.961943	-1.79476e-05	0.993474	-0.0233806	0.627259	0.0614837	0.207211
347	870307	COL8A1	-0.0192319	0.592754	-0.0227491	0.520455	-0.0397775	0.420742	0.0503985	0.306105	1.12202e-05	0.956979	-2.89415e-05	0.754745	-3.87983e-05	0.644016	-0.000415783	0.0382068	-0.000113752	0.030557	0.00206431	0.249069	0.0306118	0.438375	-0.0611775	0.126914
348	6860670	USMG5	0.217925	0.244518	-0.0205623	0.913342	0.411706	0.126327	0.225912	0.385581	-8.5526e-05	0.937473	0.000498719	0.302234	-0.000672052	0.132694	0.000683496	0.514175	-0.000104	0.707867	0.000183237	0.984604	-0.214108	0.304397	-0.0244632	0.907175
349	2810280	C6orf143	-0.0459523	0.14651	-0.0120325	0.695674	-0.0901951	0.0314583	-0.0187984	0.664094	-0.000130964	0.475677	-4.22669e-05	0.604557	2.33932e-05	0.743861	-2.67418e-05	0.879199	-2.35914e-05	0.606175	-0.00101528	0.516608	0.0483406	0.161171	-0.00413704	0.906784
350	940392	ZNF579	-0.0982171	0.0188129	-0.0767522	0.0646736	-0.0976405	0.0931763	-0.0453431	0.430999	0.000141659	0.559608	-8.25218e-05	0.442954	6.65793e-05	0.503891	-0.000183937	0.430625	3.20983e-05	0.603035	-0.000346472	0.869266	0.00113648	0.980316	-0.0229643	0.625799
351	3190082	ATP13A4	0.00202484	0.947768	-0.0593834	0.0494893	0.00543239	0.897381	-0.067716	0.107566	0.000216249	0.225744	-0.000133173	0.093771	6.03991e-05	0.407051	0.000160988	0.350253	-9.26266e-05	0.04071	0.000550435	0.719849	0.00793728	0.814284	0.0628893	0.0679433
352	830358	SPATA22	-0.0594503	0.0277896	-0.000676826	0.979551	-0.0515373	0.16025	0.0622993	0.0905544	-4.46493e-05	0.774763	1.03678e-05	0.88146	2.41768e-05	0.701701	0.000169027	0.261745	-6.73117e-05	0.0880051	0.00115499	0.388598	0.0177702	0.547491	-0.00394306	0.895719
353	3370487	ARHGAP21	-0.16068	0.00105052	-0.117068	0.0181453	-0.196749	0.00518312	-0.241726	0.000400224	-0.000202551	0.479026	-0.000214363	0.0893948	-5.24645e-05	0.657739	0.000305215	0.266211	-6.46587e-05	0.375078	0.00141925	0.569413	-0.073155	0.179684	-0.0340263	0.540599
354	4120048	DDX19A	0.02825	0.432584	0.0250441	0.481767	-0.0159913	0.748924	0.0594246	0.228377	-0.000110762	0.595244	4.90571e-05	0.596208	3.00319e-06	0.97208	-1.83503e-05	0.927267	2.12397e-05	0.688759	-0.00133385	0.459503	0.0208451	0.598495	0.0493644	0.220939
355	6110296	DMRTA1	-0.0606304	0.0405514	-0.0229461	0.425816	0.00757985	0.846844	-0.0568045	0.160678	-0.000244421	0.154965	-1.63864e-06	0.982867	-9.115e-05	0.176928	1.91187e-05	0.907498	-2.69566e-05	0.530065	-0.000208207	0.887172	-0.0073154	0.820511	0.0314508	0.342391
356	5490427	C20orf144	0.00637223	0.840288	0.0099601	0.749255	-0.0293665	0.496091	-0.07222	0.0972908	-0.000114766	0.532151	8.13167e-05	0.318596	-0.000109626	0.132572	4.07157e-05	0.817212	2.16401e-05	0.639361	-0.00245308	0.120472	0.0198776	0.567399	-0.0502654	0.155608
357	2100465	HIST1H2AJ	0.0147752	0.618264	0.00318205	0.911284	0.065029	0.0968166	0.0570165	0.155019	0.00011949	0.484495	2.47926e-05	0.745033	-4.74659e-05	0.487155	0.000156081	0.343655	-4.37114e-05	0.309244	0.00293097	0.0440744	-0.0107176	0.738582	0.0157053	0.633156
358	6650110	MXI1	-0.0032086	0.911305	0.0377416	0.187826	0.0724783	0.0732142	0.00534874	0.892577	-0.000239192	0.152043	0.00010647	0.151086	4.74594e-05	0.490572	4.63704e-05	0.773364	4.8743e-05	0.251464	0.00274745	0.057729	-0.0340644	0.284116	-0.0109087	0.735308
359	7200356	MXI1	-0.0961629	0.014778	-0.0865243	0.0296159	0.0665379	0.23745	-0.0956627	0.0816133	-0.000136037	0.55458	0.000107363	0.290351	0.000100434	0.289006	-0.000187168	0.396008	-5.66867e-05	0.33339	0.0025124	0.210879	0.0783601	0.0738925	-0.0309199	0.489501
360	6370091	C7orf33	-0.00511693	0.86975	0.0718612	0.0171901	0.0244359	0.555802	0.0535116	0.205934	-0.000242218	0.177908	0.000129704	0.106452	-3.28296e-05	0.645374	-0.000222796	0.19948	-4.81044e-05	0.286491	-0.00158643	0.300778	-0.0168622	0.619251	0.0209463	0.544929
361	1340139	CEBPZ	-0.0147138	0.775761	-0.00708549	0.891914	-0.0707431	0.337793	-0.0784959	0.27509	0.000106324	0.724337	1.69325e-05	0.898601	0.000243082	0.0512897	-6.97545e-05	0.809214	4.82963e-05	0.529549	0.000415071	0.874674	0.0904773	0.114991	-0.0165936	0.7777
362	4850592	CNO	-0.128789	2.08955e-05	-0.138626	4.83837e-06	-0.0521413	0.226595	-0.0698799	0.0942139	0.000176947	0.314027	0.000114566	0.141407	-9.34451e-05	0.201856	-0.00036607	0.0307847	-8.60298e-06	0.847919	-0.00046072	0.763121	0.0339293	0.31164	-0.018213	0.59251
363	4900039	SYVN1	0.0472459	0.278816	-0.0169674	0.698648	-0.00879723	0.88712	0.107695	0.0749671	-0.000450264	0.0762621	1.93135e-05	0.863375	0.00021311	0.0426213	0.000219072	0.36919	0.000163646	0.0115113	-0.0007076	0.749177	0.0143415	0.766845	-0.00351252	0.943283
364	3840278	TCERG1L	-0.0161898	0.649134	0.0125264	0.716437	-0.0760058	0.110573	-0.0157786	0.743672	0.000110927	0.588708	-5.85302e-05	0.522496	0.000126564	0.124821	-3.44366e-05	0.861995	3.16637e-05	0.540533	-0.000569779	0.745225	0.0126975	0.742946	-0.037489	0.342797
365	6100687	GENX-3414	0.0221733	0.450366	0.0726475	0.0109778	0.0823899	0.035962	0.042394	0.289023	-0.000189688	0.264095	-9.10035e-05	0.22862	4.86561e-05	0.474625	-9.41523e-05	0.564592	-1.7938e-05	0.674936	0.0013487	0.353475	-0.029337	0.358917	-0.0274723	0.401631
366	7050630	LENG9	-0.00804856	0.769128	0.0139472	0.606342	-0.0208939	0.576359	-0.00367094	0.92256	-0.000159073	0.318523	6.87944e-05	0.330052	-1.09704e-05	0.863844	-0.000110354	0.469947	7.71574e-06	0.847833	-0.000661761	0.630316	0.0515897	0.0865687	0.0109304	0.723282
367	4760041	BRD8	0.0360256	0.268723	-0.0102594	0.751247	-0.0596934	0.183577	0.0461599	0.305406	-0.000117595	0.5355	4.63071e-05	0.580906	2.44531e-05	0.749764	0.00012654	0.485751	6.11596e-05	0.202493	-0.00140906	0.391287	-0.00208571	0.953648	-0.0252862	0.492873
368	2070523	FLJ20625	-0.189697	0.000569649	-0.19833	0.000337545	-0.141507	0.0719879	-0.267687	0.000444741	0.000359549	0.2614	-9.4741e-05	0.503831	-0.000258862	0.0514344	-3.65653e-05	0.905555	-6.70645e-05	0.411669	0.00276168	0.321868	-0.0551166	0.366937	-0.0739193	0.23336
369	3180037	LRRIQ2	0.117164	0.000347111	0.143112	7.73776e-06	0.117428	0.00690946	0.133457	0.0030381	3.37861e-05	0.859426	0.000129956	0.124045	-0.000264063	0.000375762	0.000158236	0.384644	-4.3581e-05	0.358838	0.00110692	0.496872	-0.0610467	0.0879047	-0.0343372	0.350581
370	3870450	VAMP1	0.0872544	0.324137	-0.16227	0.0694266	-0.0878949	0.49006	-0.080749	0.511962	0.000371326	0.471583	0.000146941	0.519437	-0.000141197	0.50669	0.000257019	0.603998	-0.000148191	0.259252	-0.00599042	0.182318	0.0201223	0.838058	0.0179195	0.857348
371	3990647	CLK3	0.127143	0.0139063	0.144333	0.00544376	0.0818401	0.26319	-0.0495363	0.489786	-0.000100315	0.739111	3.28585e-05	0.804816	-2.47546e-05	0.842268	0.000714761	0.0133509	2.14849e-05	0.779544	0.0034537	0.188486	0.0728018	0.203799	-0.00415165	0.943628
372	6900253	CLK3	0.0802066	0.0150943	0.118417	0.000344718	0.103985	0.024825	0.0681728	0.136397	-0.000392514	0.0413506	0.000200576	0.018171	-4.57142e-05	0.56349	0.000581392	0.00160589	7.52012e-05	0.124536	0.000632162	0.706161	0.0358079	0.326882	0.0240497	0.522096
373	20647	PPRC1	0.0994931	0.0349202	0.140427	0.00317974	0.125691	0.0634046	0.214176	0.00110094	-0.000457414	0.0962046	9.4187e-05	0.438233	0.000178151	0.116188	0.000162706	0.537613	-4.12005e-05	0.556389	-0.00134916	0.573415	0.0367465	0.483614	0.0298647	0.574784
374	6560465	CXXC5	-0.314036	2.55084e-05	-0.443874	3.69875e-09	-0.237081	0.0267088	-0.253959	0.0144542	0.00066809	0.124532	-0.000441774	0.0215176	-0.00039051	0.0290553	0.000886445	0.0336137	-0.000119251	0.28153	-0.00279089	0.461601	0.0145816	0.860483	0.0468772	0.577487
375	1260731	C6orf167	0.0437843	0.0845355	0.0208551	0.399423	-0.00125879	0.970707	0.0451804	0.191288	-0.000158699	0.278729	9.39392e-05	0.150681	3.88945e-05	0.507459	-0.000220319	0.119265	3.24811e-05	0.379054	-0.000520605	0.678352	-0.00687834	0.804133	0.00752156	0.789822
376	5290671	POLR3H	0.00285935	0.921612	0.0130843	0.642659	-0.00203588	0.957966	0.00396877	0.920054	6.96304e-05	0.678691	-6.54186e-05	0.381753	3.52881e-05	0.598191	-2.77728e-05	0.863527	-2.15813e-05	0.609269	0.000650939	0.650362	-0.00645656	0.838041	0.0377309	0.244231
377	4610241	MGC34821	-0.0141691	0.691765	-0.0156117	0.653576	-0.0133272	0.781395	0.0152074	0.754797	-0.000325115	0.114865	0.000128024	0.1646	0.00014424	0.0776004	8.30257e-06	0.966733	5.26484e-05	0.309291	0.00292629	0.0971006	-0.0700197	0.0729354	0.0715328	0.0714378
378	1450221	MGC48628	0.0255063	0.444512	0.0364836	0.273732	0.0230575	0.620732	0.0475332	0.305906	-1.27984e-05	0.947625	-5.90611e-05	0.492165	3.42711e-05	0.659994	0.000237505	0.201523	8.60043e-05	0.0803558	-0.00056519	0.73781	0.0052332	0.887395	0.0149414	0.691707
379	3930324	CDRT15	-0.0187535	0.539736	-0.0030316	0.918037	-0.0130968	0.745758	-0.0875485	0.0344614	5.67724e-05	0.747123	-5.72094e-05	0.467589	8.8945e-05	0.200256	-0.000289086	0.0892362	-6.83291e-06	0.876842	0.002032	0.175099	-0.0177839	0.592249	0.0289863	0.392125
380	60626	OR2G6	-0.00435432	0.887253	0.0259496	0.391857	0.0816464	0.0506063	-0.0210848	0.617805	-0.000103297	0.563039	4.69341e-05	0.552849	-1.10146e-05	0.878341	-0.000133958	0.433434	-2.97356e-05	0.509531	-0.00165516	0.282838	0.00195761	0.953634	-0.0217729	0.529713
381	5130379	CLCF1	0.196005	0.0333377	0.301489	0.00117573	0.476273	0.000328182	0.568713	8.73761e-06	-0.000457813	0.393113	-0.000103546	0.662907	0.00030049	0.174482	-0.000281855	0.584833	-0.000119154	0.383211	0.0056458	0.226518	-0.123221	0.229205	0.0992607	0.337397
382	2490494	FLJ22313	-0.0172764	0.715346	-0.0682257	0.153452	-0.0372156	0.58261	-0.0136546	0.835881	-0.000327492	0.235944	1.07362e-05	0.929805	0.000257527	0.0243156	-7.87989e-06	0.976279	0.000104282	0.138698	0.00302912	0.20894	0.0599585	0.254655	0.0879674	0.101982
383	5260088	TIMP2	-0.0196453	0.754041	-0.0307163	0.623588	-0.0658565	0.457321	-0.167821	0.0520681	0.000366172	0.314177	-0.000230833	0.152853	-0.000112806	0.452829	-0.000156815	0.654747	-0.000183492	0.0476803	0.00161506	0.609139	0.0135767	0.844806	0.000952472	0.98919
384	6040521	TIMP2	-0.121942	0.135474	-0.269767	0.00108464	-0.194235	0.097024	-0.178503	0.116819	0.000376824	0.429504	-0.000213402	0.309879	-0.00039176	0.0471372	-0.000411684	0.367746	-3.31973e-05	0.784649	-0.0101274	0.0149614	0.057592	0.526003	-0.0885893	0.340304
385	4040577	TCEAL5	-0.0202003	0.479032	-0.0409151	0.146506	0.00957	0.806142	0.0681881	0.0820414	-3.26553e-05	0.843825	3.78035e-05	0.606702	-6.10003e-08	0.999277	5.22666e-05	0.742381	-6.53904e-05	0.119217	0.00026786	0.85162	-0.0467689	0.135032	0.0670435	0.0370965
386	1240041	CISH	-0.183085	0.00730015	-0.0683021	0.320069	-0.17574	0.0704153	-0.0459797	0.628875	-0.000700468	0.0787993	-0.000277773	0.114213	0.000480371	0.00302509	-0.000958192	0.011928	0.000103744	0.305164	0.00297326	0.391593	0.146846	0.0528968	-0.0575486	0.455474
387	4490368	HSPA12B	-0.00529473	0.848601	-0.0333916	0.211466	0.00833509	0.820019	0.0855146	0.0227967	0.000157637	0.32355	7.60303e-05	0.287196	-0.000116293	0.0644367	-0.000151553	0.325931	-1.29132e-05	0.746621	0.000313472	0.817586	-0.0859333	0.00433427	0.0835506	0.00652836
388	2970364	THEG	0.00651052	0.831411	-0.0699465	0.0183448	0.06049	0.135196	0.00872278	0.834005	-0.00016784	0.343064	5.18428e-05	0.510219	2.65417e-05	0.705876	0.000111711	0.511027	5.15854e-05	0.245376	-0.00224044	0.138237	-0.0120795	0.716058	0.0746965	0.0286081
389	7200475	KIRREL2	-0.027436	0.316253	0.0288886	0.288112	0.0206577	0.585173	0.0593716	0.116809	-8.72096e-05	0.584336	-1.90668e-07	0.997843	-7.53601e-06	0.906563	2.65632e-05	0.861821	-6.04064e-05	0.133783	0.000266785	0.846621	0.00195842	0.948271	-0.0598186	0.0526667
390	110202	FLJ13149	-0.178277	7.36536e-05	-0.115426	0.0109001	-0.0612522	0.341269	-0.151949	0.0152495	0.000496916	0.0581752	-3.08756e-05	0.789937	6.66918e-05	0.534759	-0.00016391	0.514418	-4.73168e-05	0.478262	-0.00196736	0.389405	0.000605299	0.990344	0.0299096	0.555308
391	5960008	AQP7	0.0240665	0.434836	-0.0521943	0.0817362	0.0254668	0.532923	0.029661	0.482139	-7.76749e-05	0.664242	-3.27928e-05	0.679922	8.01607e-05	0.250207	0.000381747	0.0258589	9.20363e-06	0.836442	-0.000342682	0.822322	-0.062354	0.0635643	0.0811104	0.0185223
392	3370026	PCP4	0.0370226	0.155156	0.0182935	0.464589	0.0569819	0.0972698	0.0435475	0.215058	2.07377e-05	0.889971	-4.43607e-05	0.507429	-2.08198e-05	0.729038	-1.34653e-05	0.925897	5.09026e-05	0.177539	-0.000211852	0.868082	0.037195	0.186788	-0.0403119	0.162281
393	1780332	DTNBP1	-0.00921363	0.821934	-0.0129104	0.753525	-0.0200805	0.729704	-0.0281537	0.619683	-0.000577521	0.0153696	0.000115299	0.27354	-5.49761e-05	0.577811	0.000599061	0.00888162	0.00013129	0.0307867	-0.0037201	0.0732227	0.0651613	0.150968	-0.0260677	0.57389
394	290678	MGC70863	0.0168191	0.637692	0.0139291	0.694373	-0.0621442	0.212786	-0.0476795	0.331473	4.90414e-05	0.812695	-4.19115e-05	0.648727	-1.18895e-06	0.988787	-0.000155534	0.435644	4.0573e-05	0.440122	0.00179297	0.316749	0.00365149	0.926156	-0.0388034	0.331191
395	3940338	E2F1	-0.0409167	0.326615	-0.0257639	0.534523	0.0674433	0.247292	0.00594435	0.917598	0.000300929	0.213901	-0.000148953	0.165368	-1.85172e-05	0.851957	-1.68658e-05	0.942285	-7.68745e-05	0.211569	0.00237058	0.258629	-0.0481163	0.295784	0.0122741	0.793277
396	2370390	FGF23	-0.0496816	0.111373	0.000793385	0.979368	-0.0168456	0.691389	-0.00202884	0.962139	-1.69909e-05	0.925193	-0.000117104	0.144681	6.58869e-05	0.369336	-7.19779e-05	0.678841	1.0908e-05	0.811699	-2.40608e-05	0.987689	0.0265114	0.437514	0.0309792	0.376536
397	6960066	TSPAN3	-0.00322961	0.964168	-0.063529	0.381266	0.107306	0.296975	-0.0802513	0.422396	0.000370711	0.376643	-0.000397272	0.0317241	-0.000197336	0.255672	0.00150877	0.000176218	0.000104574	0.327865	-0.00844712	0.0209211	0.0353464	0.658173	-0.00902624	0.911911
398	5420538	GSTP1	-0.125458	0.0153172	-0.118949	0.0224753	0.00329115	0.964525	-0.106145	0.139409	0.000625991	0.0377409	-0.00019906	0.134838	-0.000256024	0.0405996	-0.00050256	0.0826651	-3.68941e-05	0.631282	-8.74797e-05	0.973428	-0.00413687	0.942597	-0.0685286	0.241665
399	540193	MMP25	-0.125168	0.376051	-0.290906	0.0415679	-0.372525	0.0672504	-0.0477616	0.808079	0.000967113	0.240273	0.000111443	0.759927	-0.000857448	0.0114523	-0.00226967	0.00414669	-0.000348332	0.096812	-0.00492823	0.492005	0.302968	0.0541998	-0.340575	0.0320805
400	6130521	CAPN1	0.0676455	0.225072	0.0311608	0.580087	0.129295	0.106137	-0.0239983	0.757412	-0.000288738	0.374945	8.27158e-05	0.564613	-0.000145496	0.277648	4.32096e-05	0.889832	7.0066e-05	0.397631	0.00247438	0.383126	-0.0634167	0.306573	0.0353607	0.575104
401	2640692	SPRR3	-0.0263334	0.406059	-0.0142711	0.645482	0.0636146	0.130843	-0.011703	0.787971	-0.000137091	0.457537	-4.8515e-05	0.552686	-0.000153338	0.0354943	0.00033212	0.0593059	2.24082e-05	0.62746	0.000755468	0.632909	-0.0380944	0.270164	0.0371534	0.29821
402	1090131	DEFA6	0.0145986	0.648602	-0.0350457	0.256384	0.00657762	0.876483	0.0343212	0.429117	-0.000156252	0.396914	0.000159901	0.0527159	9.28167e-05	0.200252	-0.000308719	0.0832198	3.74635e-05	0.416678	-0.00145317	0.354642	-0.0506718	0.145513	0.0358038	0.312886
403	2940373	UPK1A	-0.00291842	0.930934	0.0446895	0.179064	-0.0123461	0.787591	-0.0371464	0.425163	0.000116898	0.551603	-1.9255e-05	0.824517	0.000104466	0.17694	-0.000307646	0.100696	2.4473e-05	0.619045	-0.00129145	0.444456	0.0769021	0.0379347	-0.0686761	0.0700954
404	3390221	OTUD6A	-0.0190868	0.633989	-0.0093143	0.810875	0.0532614	0.315843	0.113906	0.0371637	-0.000294612	0.20466	0.000270382	0.00883016	-0.000101955	0.266985	-0.000429705	0.0537935	-3.72884e-05	0.521484	-0.00152679	0.441332	-0.00851006	0.845186	0.0168511	0.706621
405	4150044	MFHAS1	-0.348377	1.70366e-05	-0.165252	0.0428287	-0.262601	0.0239441	-0.241753	0.031381	0.000771524	0.101577	0.000147101	0.481196	-0.000266836	0.170879	-0.00086405	0.0567786	-6.7424e-05	0.574665	0.002074	0.613268	0.0658154	0.464857	-0.0079779	0.930138
406	5260209	SGK3	0.0703208	0.0548632	-0.0820963	0.0247564	-0.0285091	0.574443	0.0288398	0.569981	-0.000206992	0.332691	8.35796e-06	0.929369	-5.21048e-05	0.548991	0.000198823	0.33023	4.81754e-05	0.373716	-0.000193488	0.91705	-0.0294149	0.46691	-0.0189088	0.650472
407	4120537	MAP3K7IP2	0.0244389	0.472439	0.0524765	0.117233	0.0197425	0.668675	0.0190406	0.683682	-0.000111196	0.573769	5.44729e-05	0.533927	3.18916e-06	0.968043	-0.000121001	0.522833	-2.19564e-05	0.659815	-0.00186828	0.272865	-0.0151006	0.685145	-0.012485	0.744533
408	5290095	MAP3K7IP2	-0.00142602	0.978313	0.0404225	0.432494	-0.10778	0.122385	0.0648491	0.368352	-0.000112424	0.712996	-4.27042e-05	0.752172	0.000138951	0.254018	0.000302256	0.299671	3.19952e-05	0.676489	0.000600799	0.819217	0.045038	0.430761	-0.027247	0.646256
409	3420541	LOC352909	-0.0229179	0.44511	0.0198645	0.498545	-0.00344137	0.932383	-0.0851686	0.0378391	0.0001159	0.504674	-3.15489e-05	0.683105	-1.88555e-05	0.786404	-9.95366e-06	0.952516	7.91728e-06	0.856464	-0.000409092	0.783732	-0.0137711	0.6747	-0.0238611	0.4763
410	6400689	LOC352909	-0.0336156	0.239018	-0.00536198	0.847599	-0.0626325	0.100544	-0.0958911	0.0144458	0.000176443	0.287671	6.97319e-06	0.924553	5.20398e-05	0.422626	-0.000270113	0.0889131	4.44402e-05	0.283398	-0.000674754	0.634362	-0.0091407	0.769672	-0.0232588	0.466823
411	3370397	MATK	0.00957688	0.728761	0.0146969	0.591794	0.0347155	0.368904	-0.00940932	0.803955	3.64733e-05	0.819684	-3.93158e-05	0.580114	5.23477e-05	0.42781	-0.000228194	0.139293	3.03825e-05	0.455662	-0.000346981	0.802309	0.049198	0.1061	-0.0517936	0.0940123
412	3450433	RAET1E	-0.0121933	0.669592	-0.0299409	0.284533	0.0773371	0.0445901	-0.0105335	0.787543	0.000195857	0.237141	-2.0136e-05	0.784255	-0.00010914	0.101327	-1.44243e-05	0.927737	2.63066e-05	0.528894	0.00114133	0.422615	-0.0216794	0.487125	0.000101726	0.997466
413	7160022	ARTN	-0.00818648	0.770104	-0.0296346	0.289338	0.0219259	0.573158	-0.00134028	0.972461	5.45891e-05	0.738272	-3.93737e-05	0.585069	3.32101e-06	0.960168	-0.000139363	0.37233	6.99836e-05	0.0911111	-7.79921e-05	0.956199	0.0213998	0.489079	0.0247614	0.437052
414	2320356	MED8	0.00563331	0.909401	-0.0525	0.284115	-0.0168713	0.806414	0.0132718	0.845108	0.00014639	0.609631	-0.000354779	0.00538577	0.000145141	0.215576	0.000290839	0.292818	0.000176956	0.0150546	0.00498111	0.0444452	-0.0485305	0.373449	-0.0131449	0.812217
415	6900605	SERINC3	0.148091	0.0071526	0.00531836	0.923379	0.0320235	0.679308	0.0558466	0.465305	-9.70419e-05	0.762621	5.31929e-05	0.707288	-2.94566e-06	0.982214	-0.000223676	0.466881	0.000165971	0.0423159	-0.00135386	0.629099	0.0483026	0.428448	-0.0133291	0.832046
416	2810072	EPHA7	0.00788768	0.770958	-0.0225059	0.387984	0.0340521	0.341136	0.045165	0.217488	0.000107079	0.492391	-3.96803e-05	0.569215	5.35928e-05	0.386833	0.000148561	0.32412	1.82643e-05	0.640824	0.00139344	0.293792	-0.0286412	0.329529	0.0304618	0.310083
417	1980102	SMURF1	0.0522058	0.265297	0.171916	0.000244699	0.0924798	0.162254	0.187572	0.00377706	-0.000357668	0.189202	7.32385e-05	0.543707	2.88388e-05	0.797469	-5.08581e-05	0.846066	-4.38758e-05	0.527203	0.00262541	0.267677	-0.0523295	0.312922	0.0783339	0.137942
418	2340368	SNRPA	-0.0825764	0.00698755	-0.00832925	0.787049	-0.0315989	0.467669	-0.111215	0.00905897	-6.79155e-06	0.969682	1.88517e-05	0.810872	-5.41149e-06	0.941283	1.08847e-05	0.949261	-0.000107296	0.0183017	0.00134884	0.386929	-0.0493095	0.146953	-0.0318684	0.359967
419	450243	CUGBP1	-0.0961536	0.295933	-0.0501574	0.588623	-0.0174518	0.894966	0.023214	0.85578	0.000450877	0.399652	6.92899e-05	0.770361	-0.000311671	0.157195	0.000227744	0.658251	-0.000203683	0.135271	-0.00404777	0.385283	0.082515	0.42012	0.0224422	0.827769
420	4810722	NCDN	0.000888623	0.980888	0.00127853	0.972349	0.00164317	0.974549	0.0253673	0.621278	-0.000237223	0.271982	0.000153152	0.109206	-8.36694e-05	0.334326	-4.27653e-06	0.983506	1.52255e-05	0.780154	-0.00047022	0.801198	-0.00206859	0.959727	-0.0193395	0.642739
421	7380519	HEY2	-0.000994777	0.974698	-0.0212097	0.490364	0.064658	0.120949	0.0583876	0.174992	-0.000266289	0.144751	1.09781e-05	0.891977	9.49601e-06	0.896269	-0.000234006	0.179295	4.99097e-05	0.276142	0.00106286	0.498257	-0.0638685	0.0614953	0.0445498	0.208662
422	6960347	OR1D4	-0.027005	0.364797	-0.0239556	0.4186	0.00164397	0.968225	0.0499076	0.226771	0.000121843	0.482806	-6.51468e-06	0.932424	-4.64931e-05	0.502177	-0.000265267	0.110265	3.8914e-06	0.929164	-0.00174439	0.244848	0.00687808	0.834452	-0.0241282	0.471425
423	5860504	HTR4	-0.0271829	0.42977	-0.00351508	0.918081	-0.0855483	0.0725804	-0.0305783	0.520858	-0.000189912	0.34319	3.46283e-05	0.696463	4.91721e-05	0.539041	-0.000538855	0.00499565	3.47607e-05	0.491537	-0.000938814	0.587373	0.081408	0.0321568	-0.0803753	0.0374867
424	4010437	CSTA	-0.136563	0.0920202	-0.0932109	0.253422	-0.126111	0.277989	-0.0584646	0.603007	0.000556308	0.238029	-0.000162725	0.436384	-0.000489763	0.0117126	-0.000237831	0.600085	-6.80814e-05	0.57086	-0.00841347	0.0404106	-0.0339261	0.706558	-0.0203631	0.822765
425	6200446	SIAE	-0.168063	0.000907994	-0.115168	0.0235336	-0.286675	7.49095e-05	-0.329149	2.58459e-06	-8.86739e-05	0.763213	-1.37629e-05	0.915989	-0.000193972	0.112803	0.000632272	0.0258254	-6.79218e-05	0.365773	-0.00150098	0.557872	-0.0289306	0.606697	0.00792945	0.889245
426	5910193	KIAA1446	0.0209834	0.683458	-0.0424861	0.406279	0.0117743	0.870155	-0.0170508	0.809766	0.000535372	0.0728207	-0.000172519	0.193123	2.73807e-05	0.822562	-0.000137471	0.63254	-9.83841e-05	0.194378	0.0048795	0.0590384	-0.0524605	0.355774	0.0198753	0.730079
427	7200180	HCLS1	-0.00547882	0.913707	0.0341613	0.501918	-0.00248676	0.972659	-0.0994983	0.155183	0.000616944	0.0358454	-0.000190305	0.144005	-0.000105754	0.38662	-4.13301e-05	0.883997	-5.42294e-05	0.469723	-0.000760157	0.766439	0.0791317	0.158818	-0.15245	0.00734209
428	4060037	CRHBP	-0.0132767	0.660187	-0.0311174	0.290168	-0.0253158	0.5272	-0.0467552	0.258834	-3.31515e-05	0.850198	-6.68586e-05	0.390732	9.09432e-05	0.183098	2.84256e-05	0.865528	2.41204e-05	0.581069	0.000535413	0.720656	-0.0397333	0.227903	-0.00721165	0.83102
429	4890370	ARHGAP8	-0.0177882	0.518778	-0.0213173	0.424965	-0.015355	0.675622	-0.076357	0.0413247	9.60909e-05	0.546266	-7.51035e-05	0.289456	1.58957e-05	0.803742	-0.000198831	0.194698	3.9883e-05	0.320296	-0.0014802	0.276836	0.0704677	0.0185837	0.0144935	0.63694
430	5360390	NOSTRIN	0.0616236	0.048488	0.0907425	0.00272564	0.0734563	0.0756314	0.00856048	0.840442	1.3164e-05	0.941947	9.74948e-05	0.225443	-0.000156394	0.0287982	7.93014e-05	0.647827	6.30257e-06	0.889315	-0.00118562	0.442059	-0.0083734	0.80511	-0.000464233	0.989364
431	5910209	2013-03-08	-0.020698	0.458721	-0.00413599	0.879251	0.0575198	0.120544	0.00744605	0.84566	3.63497e-05	0.822791	-1.41336e-05	0.844393	4.93949e-05	0.438719	1.21562e-05	0.937588	5.26431e-05	0.194188	0.00120676	0.384217	-0.0162714	0.592887	-0.0238873	0.445455
432	5810053	NUP155	-0.0259581	0.567971	0.0454668	0.320069	-0.0841255	0.193482	0.0449025	0.476642	-0.000180071	0.49648	-0.00016238	0.164996	0.000363059	0.000921909	6.75943e-05	0.790322	1.08472e-05	0.872362	-0.000387528	0.866682	0.0666766	0.186148	0.0114706	0.823735
433	4900154	FN3K	0.0239707	0.423411	-0.0193484	0.515118	0.0106379	0.79697	0.0481484	0.243405	0.000199546	0.251767	-2.49251e-05	0.746334	4.11144e-05	0.562759	-2.38713e-05	0.88633	6.24238e-06	0.887616	-0.00187463	0.214057	0.00367217	0.911258	0.0160971	0.634196
434	4590551	EDA	-0.0206427	0.576453	0.0405145	0.264464	0.0114765	0.818638	-0.0138801	0.784844	-4.01045e-05	0.851825	6.74327e-05	0.479184	-0.000161316	0.0570515	-8.90562e-05	0.665154	-9.55927e-05	0.0758734	0.00535946	0.00362992	0.0193462	0.633271	-0.00670366	0.871263
435	7570079	IL7R	0.39401	0.000127319	0.159642	0.120892	-0.170504	0.234556	0.0819603	0.565542	-0.000181774	0.761879	0.000232165	0.380345	0.000180421	0.462434	0.000514905	0.36945	-2.28775e-05	0.880645	-0.00663769	0.203943	0.146843	0.196442	0.0373105	0.750411
436	4210593	FAM98B	0.321186	0.000303001	0.198935	0.0264341	0.406279	0.00147322	0.174691	0.156755	-0.000263199	0.61096	0.000463736	0.0428681	2.11971e-05	0.92129	0.000823721	0.0981376	-0.000104831	0.427058	-0.00873828	0.0524661	-0.0250754	0.799693	0.139269	0.164336
437	3520253	MARK4	0.000124292	0.997138	0.0715586	0.0364822	0.00149712	0.974518	-0.022851	0.632763	1.76831e-05	0.930252	-0.00016064	0.0720287	5.94495e-05	0.460356	0.000204075	0.289757	-4.35597e-05	0.390976	0.00150622	0.387165	0.0440511	0.24638	-0.0629768	0.108448
438	2650241	TAS2R40	0.011231	0.657711	-0.000724392	0.976559	-0.0303302	0.369206	-0.0359138	0.298719	-3.50562e-05	0.811213	0.00010671	0.10204	-4.06959e-05	0.48581	-0.000165554	0.240243	-1.94747e-05	0.59719	0.000828373	0.509218	-0.0406679	0.140504	-0.000753277	0.978764
439	7150037	POF1B	0.0378506	0.218314	0.0662153	0.0256366	0.134537	0.000931182	0.114944	0.00575834	-0.000324764	0.0672396	1.59288e-05	0.840304	-7.54788e-05	0.288836	0.000368638	0.0309862	4.53863e-05	0.309705	-0.00207945	0.169401	0.0312927	0.347332	0.0374225	0.273739
440	1580414	P2RX2	0.0553507	0.0534742	-0.0116331	0.678056	0.00470584	0.903009	0.0593144	0.130784	-0.000204137	0.218901	5.73173e-05	0.437987	-9.49209e-06	0.884928	5.30558e-05	0.739565	3.09841e-05	0.45684	0.00384137	0.00690865	-0.00286601	0.927213	0.0364324	0.254341
441	4590398	NCOA3	0.0386965	0.418087	0.0582917	0.224016	0.00792704	0.906295	-0.0518953	0.433612	-0.0001501	0.589898	5.46805e-05	0.656471	-0.000113	0.32484	0.00134423	4.76457e-07	-0.000126609	0.0742045	-0.00314185	0.195491	0.00471992	0.928925	0.0744294	0.170564
442	1780477	TMOD1	0.0196596	0.815191	0.0501629	0.55381	0.240526	0.0460505	0.126203	0.279992	-0.000658056	0.178751	2.65424e-05	0.902707	0.000423316	0.0346326	0.000716592	0.127783	0.000168925	0.17491	0.00404744	0.341907	-0.0186743	0.841794	-0.0171058	0.855871
443	5050221	STAT5A	0.0678152	0.266551	0.164628	0.00739727	-0.0210034	0.810454	0.223915	0.00813812	-0.000350487	0.323619	8.70835e-05	0.579608	-8.66885e-05	0.556336	0.000280413	0.412064	-0.000197279	0.0294486	-0.000338945	0.912724	-0.0167032	0.805437	0.0402483	0.558199
444	4220110	HES1	-0.0702653	0.158716	0.0484395	0.329854	0.0330057	0.638023	0.159415	0.020436	-0.000226804	0.432994	-4.9501e-05	0.700153	-0.000103725	0.379868	0.00101825	0.000257527	-0.000123525	0.0926958	0.00221773	0.37639	-0.0620345	0.260642	0.0766465	0.169278
445	2570369	H2AFY2	0.0465142	0.267387	0.0359705	0.395263	-0.0174119	0.771529	-0.0680971	0.243375	0.000439494	0.0724443	0.000120597	0.2638	-8.6087e-05	0.394295	-0.000167195	0.47598	-6.16515e-05	0.322634	-0.0030936	0.14721	-0.048873	0.294364	-0.0426359	0.370255
446	1570333	LOC284296	-0.0421241	0.216268	0.0116974	0.725615	0.047365	0.295216	0.0102081	0.826842	-0.000107624	0.586922	0.000138898	0.113532	-6.63301e-05	0.401698	-0.000366205	0.0530098	-1.45215e-05	0.770352	-0.000972565	0.567405	0.00722577	0.845427	-0.0295946	0.440745
447	1770673	HOXC13	-0.0449976	0.305454	0.0251461	0.568892	0.0915352	0.141746	-0.0263869	0.664987	-0.000291997	0.253718	8.08727e-05	0.473977	1.92776e-05	0.855406	3.68447e-05	0.880684	2.40837e-05	0.711909	-0.000804524	0.718348	-0.00646895	0.894298	0.0538595	0.279746
448	1570608	SCN8A	0.0132366	0.666653	0.0660937	0.0268295	0.0304944	0.453778	0.0772639	0.0657099	-7.18815e-05	0.68664	5.06019e-05	0.522974	-3.15055e-05	0.651631	0.00027149	0.112012	-6.58242e-05	0.138847	0.00163255	0.282685	-0.0266011	0.426728	0.0327081	0.340327
449	7200224	PDE1C	-0.0180346	0.525792	-0.00371257	0.892523	-0.0191415	0.612003	-0.00445656	0.908032	-0.000253808	0.121179	3.91982e-05	0.592557	0.000113439	0.0786522	-3.56305e-05	0.821799	4.00117e-05	0.329177	-0.000119196	0.931953	0.0114317	0.711766	-0.00889358	0.777719
450	5890022	MPHOSPH10	-0.0680807	0.124269	-0.124914	0.00522865	-0.213276	0.000792399	-0.218774	0.000388305	0.000233367	0.366384	-1.57692e-05	0.890007	0.000125689	0.238967	0.000142668	0.564919	-5.56812e-06	0.932575	0.000192846	0.931763	0.032572	0.508385	-0.00653887	0.896224
451	240561	POLR2H	0.0164582	0.586611	-0.0622229	0.0398412	-0.0118014	0.782182	-0.052191	0.212183	0.000237145	0.177802	5.44634e-05	0.484322	-2.40997e-05	0.740101	-0.000210293	0.213833	2.07617e-05	0.643331	0.00011698	0.939078	0.00828111	0.804644	-0.0250843	0.462715
452	130575	ADAT1	0.202469	8.03595e-06	0.104537	0.0221319	0.101874	0.116305	0.00339146	0.957121	0.00027779	0.293292	9.97921e-05	0.393223	-5.02512e-05	0.643156	-8.31837e-05	0.742892	-6.89143e-05	0.305674	-0.00250081	0.277479	0.0379016	0.452201	-0.00882311	0.862894
453	3850497	PWP1	-0.0424271	0.241291	-0.00392809	0.91399	-0.028017	0.586518	-0.0802164	0.110677	-0.00010745	0.610332	-7.1844e-05	0.441615	6.87177e-05	0.424296	0.000711138	0.000440982	7.67194e-05	0.152219	0.00212738	0.245965	0.0458906	0.253721	0.0192676	0.635655
454	2970390	SLC27A5	-0.0845661	0.0318564	-0.0289417	0.460593	-0.103975	0.0599499	-0.0373383	0.491403	3.5681e-05	0.875984	0.000143934	0.155941	-0.000118187	0.208443	0.000232124	0.291757	-0.000102495	0.0780015	-0.00512945	0.00967521	0.0488752	0.261293	-0.0434957	0.325124
455	6860274	ADARB2	-0.120427	0.0916175	-0.0395084	0.582691	-0.0948982	0.353654	-0.0826924	0.404245	0.000405118	0.329398	-0.000228111	0.215787	-0.000122968	0.469592	0.000328112	0.411315	-3.7216e-05	0.724723	0.00357566	0.322506	0.0337043	0.671226	-0.0295412	0.711694
456	2900113	PLSCR4	-0.0743166	0.0161441	-0.091136	0.0025181	-0.0199735	0.632402	-0.0710319	0.0920622	-4.66617e-05	0.793625	-9.84342e-05	0.216442	-3.95359e-05	0.577197	0.000311383	0.0704809	-3.05251e-05	0.496175	0.000868182	0.569973	-0.0328046	0.331925	0.0620315	0.0707689
457	2600678	NBPF11	0.162214	0.00125479	0.0756379	0.13534	0.178023	0.0130482	0.118127	0.0911514	6.16737e-05	0.833392	9.81471e-05	0.448223	2.97969e-05	0.805249	0.000324824	0.247911	-4.75075e-05	0.524674	0.00111193	0.663599	-0.0316644	0.570736	0.0532697	0.349675
458	5720221	MARVELD2	0.0303699	0.301221	0.0147084	0.60392	0.0762593	0.0495034	0.0672594	0.0915566	-0.000173893	0.304507	0.000112109	0.138625	-8.15554e-05	0.219724	3.63286e-05	0.824065	9.22668e-05	0.0292682	0.00101088	0.483215	-0.0394579	0.216661	0.0080895	0.803855
459	3130349	REPIN1	-0.0592764	0.0941408	0.00710313	0.837385	0.0322412	0.502952	-0.0327564	0.49701	0.000477095	0.0196452	1.07441e-05	0.906114	-0.00018405	0.0264527	-0.000191695	0.331492	-8.31498e-05	0.108091	0.000825228	0.638435	-0.0187475	0.62818	-0.0260633	0.508684
460	6130014	REPIN1	-0.0633812	0.289787	-0.0100831	0.867368	-0.126483	0.1405	-0.0447475	0.590754	-0.00010228	0.769371	2.12904e-06	0.98898	-0.000174904	0.225566	0.000366041	0.274668	-0.000152753	0.0858762	5.9772e-06	0.998431	0.0286457	0.66683	-0.0828651	0.22062
461	4640280	ITSN1	0.0344093	0.240811	0.0391916	0.169977	0.0343942	0.376556	0.112399	0.00502866	0.000118652	0.485773	-4.9954e-05	0.508552	-5.41322e-05	0.422729	0.000257165	0.11468	9.90621e-06	0.816393	-0.0012746	0.381279	0.0325962	0.306859	0.0193626	0.555722
462	650743	TMEM103	0.103452	0.0053242	0.0946554	0.0105946	0.101476	0.0517325	0.155833	0.00238969	-0.000393491	0.068094	0.000104215	0.276195	0.000103721	0.236758	0.000375335	0.0702802	-2.50613e-05	0.646955	0.00150147	0.421893	-0.0673041	0.101292	0.0126933	0.760221
463	1410121	FAM38B	-0.0240142	0.465059	-0.0107559	0.737329	0.0953111	0.0295054	0.0897476	0.0463933	0.00013895	0.46679	5.43674e-05	0.52123	-7.00948e-05	0.349043	-2.98113e-05	0.870443	7.11515e-05	0.135714	-0.000328611	0.840395	-0.0437578	0.222701	0.0479667	0.192308
464	730040	P2RX5	0.0123461	0.850272	-0.028746	0.662274	0.020941	0.822015	-0.155351	0.0873131	0.000440475	0.247876	-0.00012574	0.455005	-0.000334722	0.0333359	0.00229788	3.29488e-10	-0.000191158	0.0490451	-0.00482412	0.146603	0.0721684	0.320154	0.118818	0.108821
465	6900372	P2RX5	-0.0152612	0.65881	-0.0272392	0.421083	-0.0966744	0.0353079	-0.0748683	0.115329	0.000497891	0.0134601	-0.000128222	0.150325	1.95163e-05	0.805118	-9.47891e-05	0.621596	9.51491e-05	0.0585223	0.00181953	0.291664	0.0134866	0.720733	-0.0861209	0.0271283
466	6510450	SCYL3	0.111295	0.0448401	-0.0466249	0.40356	-0.0534734	0.495854	0.0282817	0.713897	-0.00017527	0.588239	5.26444e-05	0.712229	2.92572e-05	0.826379	8.5594e-05	0.782416	0.000163711	0.0470097	-0.00303539	0.282694	0.0380049	0.536893	-0.0944803	0.135204
467	3140717	HEYL	-0.0331843	0.272708	0.0333722	0.257764	-0.00751244	0.85148	0.0152128	0.713805	0.000199231	0.257318	2.02834e-05	0.794894	-7.0966e-05	0.301464	-0.000113977	0.497894	-3.31403e-05	0.449731	-0.00274745	0.067258	0.0621101	0.0598126	-0.143162	2.39741e-05
468	5890427	ALG5	-0.0235016	0.683185	-0.0417946	0.470753	-0.137375	0.0914759	-0.00147107	0.985341	-0.000264567	0.431165	-0.000103384	0.485217	0.000338021	0.0147582	-2.29283e-05	0.943179	0.000107099	0.21079	-0.0011907	0.684938	0.0120251	0.850659	-0.0130095	0.843198
469	6200671	ZNF646	0.0239058	0.485483	0.00166041	0.961312	0.0226875	0.636403	0.110502	0.019907	8.1168e-05	0.684237	6.87432e-05	0.435956	-2.1596e-05	0.7907	-0.000509612	0.00772273	1.18699e-05	0.814756	0.00120157	0.488188	-0.0313465	0.40813	-0.00355641	0.926813
470	5810195	ACCN4	-0.0364758	0.377789	0.0501622	0.229388	0.0903065	0.12707	-0.0127844	0.824129	-0.000358768	0.136846	0.000146211	0.169374	-2.2572e-05	0.821293	4.36888e-05	0.850262	-6.78388e-06	0.912146	0.0012165	0.563065	-0.00790118	0.863484	0.0269439	0.565873
471	580520	PPM1A	-0.0444957	0.335792	-0.0114871	0.802988	0.115523	0.0759385	-0.064659	0.309127	-0.000400408	0.135302	-7.80505e-05	0.511646	0.000147297	0.18527	0.000450524	0.0814015	0.000104163	0.127513	0.00160862	0.489398	0.00461422	0.927976	0.0235939	0.649411
472	3870403	SLC16A10	0.227849	0.00308179	0.216941	0.00513077	0.25134	0.0225426	0.304216	0.00441827	-0.000165258	0.712346	0.000304311	0.12494	-0.000123232	0.505396	0.00102952	0.0168504	-0.000164961	0.14873	-0.0137098	0.000445947	0.0163892	0.848056	0.0298734	0.730471
473	5670482	TMEM39B	0.0244417	0.516023	-0.00748534	0.843339	-0.076628	0.151824	-0.0699255	0.181028	0.000354606	0.106017	-7.89375e-05	0.414796	-0.000188481	0.0377821	0.000200785	0.339904	-0.000163735	0.00341294	-0.000355207	0.852766	0.0206754	0.620469	-0.0386973	0.365572
474	3840273	BTBD14A	-0.232844	0.000283006	-0.187689	0.00371927	-0.126446	0.169076	-0.19686	0.0272241	0.000479259	0.199708	-0.000218817	0.184989	-0.000199929	0.196585	-0.000889135	0.013265	-0.00015205	0.110597	0.000162498	0.960215	-0.0773406	0.277878	-0.04075	0.574287
475	1010114	C20orf67	0.119744	0.0173285	0.12098	0.0165732	0.129748	0.0672009	0.210644	0.00256005	-0.000300551	0.305631	-2.25749e-05	0.861576	0.000137458	0.254572	4.52349e-05	0.872124	9.00001e-05	0.228025	0.000955559	0.708621	0.0384915	0.489809	-0.0197186	0.730402
476	7150048	FST	-0.04075	0.11449	0.021861	0.391874	-0.0522421	0.137529	0.0116221	0.743897	-0.000248171	0.0986567	7.68991e-05	0.247406	8.89455e-05	0.142524	-0.00020231	0.15938	-2.49829e-05	0.510394	0.000450235	0.728827	-0.0280703	0.321727	0.0415461	0.154827
477	160332	LOC493856	-0.129268	0.0112618	-0.0853563	0.0963678	-0.119982	0.0997758	-0.103248	0.144382	-8.88321e-05	0.764767	-0.000153896	0.240941	0.000358279	0.00365057	-0.000280811	0.325289	0.000137841	0.0688393	0.00426366	0.0993381	0.00367395	0.948259	-0.0754609	0.190468
478	360392	BAGE4	0.0101085	0.73386	0.0434598	0.138209	0.0202279	0.621779	0.0152869	0.707406	0.000344914	0.0449683	-3.90708e-05	0.60989	2.6417e-05	0.705191	-2.25606e-05	0.891845	-8.67652e-05	0.0464674	-0.001035	0.485309	0.0178078	0.585817	-0.038434	0.24662
479	4010653	CASP14	0.0374051	0.186708	-0.0622457	0.0247302	0.0146852	0.696363	-0.0676945	0.0815511	0.000153483	0.351882	7.74269e-05	0.288993	-4.7681e-06	0.94181	-0.000341219	0.0301737	-3.68164e-05	0.372581	0.000314225	0.824086	-0.0460709	0.13549	0.0394517	0.21641
480	630451	PREI3	-0.188371	2.56603e-07	-0.204137	2.99129e-08	-0.115351	0.0266923	-0.192456	0.000155426	0.000359538	0.0919293	-0.000106729	0.256589	0.000116603	0.18424	-0.000165344	0.418373	5.78966e-05	0.286415	0.000568079	0.76019	0.0446962	0.271035	-0.00930117	0.822775
481	6420537	PREI3	0.0541676	0.29686	0.275384	1.13991e-07	0.154539	0.0356917	0.0591319	0.409359	-0.000206767	0.492787	3.71993e-05	0.781009	-9.30642e-05	0.4535	0.000552097	0.0572843	5.57209e-05	0.467798	0.00277515	0.28923	0.0466375	0.417405	-0.064436	0.2682
482	3780685	UTP14C	0.14838	0.00158102	0.0544061	0.249831	0.0294547	0.658823	0.166257	0.0109101	-0.000375069	0.171008	-0.000236031	0.0507867	0.000330086	0.00345883	0.000746043	0.00447722	0.000156193	0.0251746	0.00377233	0.114495	-0.0526465	0.312547	0.0232318	0.663452
483	2060193	FLJ43752	0.0386944	0.171808	-0.00695286	0.803442	-0.0512185	0.186203	-0.0287046	0.461863	-0.000100076	0.542906	0.000133817	0.0668577	-8.13646e-05	0.213474	0.000304113	0.0539628	-5.53826e-05	0.180855	-0.00493462	0.000489751	0.0181537	0.560002	-0.00921752	0.771165
484	6200465	DUPD1	-0.0246724	0.402867	-0.00727333	0.800747	-0.0234485	0.553282	0.0496738	0.219285	-0.000341626	0.0458914	8.72872e-05	0.251093	-9.40719e-06	0.888754	0.000247268	0.131924	1.80603e-05	0.673172	-0.00183822	0.20929	-0.0115425	0.720501	-0.0334096	0.310558
485	6770286	SAMD13	-0.0136907	0.681312	-0.0389307	0.241734	-0.0760629	0.10141	-0.0634948	0.170274	-2.49007e-05	0.898134	-0.000125087	0.145413	-4.89674e-06	0.949935	6.86205e-05	0.711964	-2.73277e-05	0.578021	0.00158377	0.347238	-0.0346924	0.346894	0.0397447	0.290924
486	460280	ZNF423	-0.0704783	0.022491	0.02144	0.471395	-0.0129102	0.751676	-0.0193989	0.642961	-5.62646e-05	0.751692	-5.29949e-06	0.946903	-0.000110934	0.112318	3.05814e-05	0.85873	-4.2377e-05	0.340621	-0.00291449	0.0541561	0.0290642	0.386505	0.0317699	0.352975
487	4570543	OR8U8	0.0875396	0.00210208	0.0876953	0.00148068	0.0479728	0.202884	0.0625062	0.10732	5.08449e-05	0.757608	5.16932e-05	0.481183	-3.48732e-05	0.588112	9.41358e-05	0.552018	-2.82077e-05	0.492538	0.00193278	0.168546	-0.0498516	0.107763	0.0144269	0.648913
488	1740274	OR7G3	-0.0612773	0.0355653	0.018443	0.514697	-0.0152703	0.692538	-0.106002	0.00755736	-0.000203815	0.227366	-3.32879e-05	0.657281	8.04574e-05	0.233194	-0.00029148	0.0719845	5.45565e-05	0.198633	-0.0027249	0.0590833	0.0564251	0.0745154	-0.0474312	0.145566
489	2000008	PPP1R12B	-0.0391447	0.237534	-0.0751221	0.0203596	-0.00740115	0.867407	-0.0547774	0.227409	-8.86074e-05	0.645097	-0.000135797	0.111709	3.29402e-06	0.965593	0.000180108	0.328496	3.44518e-05	0.475381	-0.000328246	0.842155	-0.0196288	0.58725	0.0469956	0.205759
490	3370239	SH2D1B	0.115611	0.334917	0.121573	0.314963	-0.120134	0.486503	-0.059488	0.720992	-0.00181572	0.00927587	-0.00038275	0.215997	-0.000163183	0.570214	0.000378952	0.572435	0.00165082	0	0.00202282	0.739281	0.0183536	0.890606	-0.0396601	0.76814
491	2970576	KRT2A	-0.103881	0.0669597	0.00374336	0.9476	-0.0874147	0.279481	-0.0696477	0.375754	8.74596e-06	0.978836	0.000462638	0.00157262	-0.000320984	0.0171002	-4.88178e-05	0.877654	0.000165055	0.0488894	-0.00362698	0.205505	-0.0154683	0.806003	-0.062084	0.32784
492	4920494	C9orf100	0.0100245	0.733486	-0.00949983	0.74299	0.0567873	0.160484	0.0108887	0.78692	-9.84483e-05	0.563148	2.33258e-05	0.758331	1.40199e-05	0.839095	0.000172228	0.294409	2.31554e-05	0.591195	0.000887126	0.545289	-0.0201344	0.533358	0.0292446	0.373094
493	6130112	C9orf100	-0.0382276	0.190092	0.0116499	0.677941	-0.0532719	0.166564	-0.0256276	0.515427	-0.000173243	0.302275	-8.83535e-05	0.238954	0.000142495	0.0332517	-0.000101766	0.530425	4.8914e-05	0.246477	-0.000765482	0.592196	0.0397664	0.208286	-0.0276475	0.392241
494	6220630	WFDC8	-0.0152465	0.627785	0.00352766	0.907116	0.0249206	0.548238	0.0195847	0.64465	-4.10316e-05	0.820677	-3.31325e-05	0.682001	9.43835e-05	0.191024	2.06394e-05	0.90603	-4.44638e-05	0.328464	0.00268261	0.081573	-0.0184608	0.587808	0.0490441	0.159115
495	2850139	CRIM1	0.0217779	0.556052	-0.0394568	0.272891	0.0779036	0.118842	-0.0345685	0.49113	-0.000145294	0.496003	-7.11246e-05	0.454373	0.000174933	0.0439364	-0.000100046	0.627353	0.000188289	0.000494294	0.00346746	0.0580776	-0.0298759	0.458594	0.0509478	0.215833
496	5810132	MGC21644	0.009623	0.72202	0.0186324	0.483625	-0.00203348	0.956206	0.0458348	0.216243	-4.34512e-05	0.781184	1.65539e-05	0.812397	-1.84101e-06	0.976536	-2.03468e-05	0.892717	-5.13274e-05	0.193222	0.00104575	0.436864	-0.0496617	0.0946832	0.0234915	0.435296
497	1440397	BUB1	0.0383216	0.305549	0.00330271	0.92953	0.0640136	0.221531	0.00577509	0.911449	-8.8688e-05	0.684137	0.000180394	0.0613858	-2.92663e-05	0.738232	0.000135019	0.517566	-0.000163335	0.00304506	-0.00201786	0.285341	-0.043597	0.292461	0.0713919	0.0896675
498	4640113	DCUN1D2	0.0375749	0.183964	-0.0250761	0.356973	-0.0486377	0.192766	-0.0401179	0.294215	0.00028529	0.0797272	-0.000113893	0.117639	9.55824e-05	0.138346	9.20782e-05	0.558245	-9.02579e-05	0.0270704	0.00328297	0.0178127	-0.0147372	0.630929	0.0309004	0.323898
499	4590519	FUT3	0.062144	0.200444	0.0552389	0.25698	0.0936298	0.173238	0.0771349	0.251839	0.000124291	0.660195	5.2466e-05	0.674405	-5.43117e-05	0.641533	-0.000158673	0.558636	-1.77504e-05	0.805348	0.00243103	0.323656	-0.0277689	0.60572	0.0460079	0.402727
500	5860022	SPHAR	-0.0276029	0.599423	-0.0471011	0.363221	-0.0880408	0.212992	-0.165295	0.0225767	0.000434754	0.156038	-0.000332389	0.0141482	1.94091e-05	0.873392	0.000312301	0.285243	2.37356e-05	0.757615	0.00380861	0.148975	0.0286449	0.618673	-0.0711901	0.231616
501	2490273	RDH13	0.0349127	0.56607	0.0889353	0.146668	0.0532446	0.54179	0.170277	0.043554	0.000220223	0.533866	-2.9453e-05	0.850877	9.66601e-05	0.510583	2.4597e-05	0.942451	-4.9932e-05	0.580399	-0.000400931	0.896539	0.0395322	0.558622	0.0172073	0.801836
502	4220088	SLC27A6	-0.00814012	0.782113	-0.0379766	0.185776	-0.0803081	0.039667	-0.0217804	0.589811	-0.000265255	0.121325	5.85229e-05	0.440861	3.837e-05	0.564417	0.000141168	0.388181	3.43603e-05	0.420146	-0.000645796	0.658447	-0.0394168	0.219923	0.0105569	0.748856
503	5080246	ASPA	-0.00614813	0.814617	-0.0227952	0.378933	-0.0190973	0.594314	0.0126837	0.726186	4.1722e-05	0.784578	-0.000150662	0.0258584	6.3833e-06	0.915951	0.00015119	0.300573	-5.97741e-05	0.119141	0.00152559	0.245605	-0.0207303	0.472587	0.0151347	0.607167
504	1570746	NPTXR	0.0037939	0.892486	-0.0235	0.390986	-0.0177883	0.632898	0.019209	0.618407	5.993e-05	0.713783	4.45141e-05	0.538781	-7.56276e-05	0.233636	-0.000235936	0.130452	4.65524e-05	0.252282	-0.00016922	0.903412	-0.0514043	0.0935733	0.0264914	0.400022
505	2850746	TCF7L2	-0.0161092	0.78566	0.0160227	0.786851	-0.0534113	0.524821	0.10708	0.190293	-0.000161516	0.63861	-0.000163171	0.285035	4.86269e-05	0.731709	-0.000267485	0.419489	6.07562e-05	0.487853	0.00129194	0.66546	-0.103854	0.113451	0.054815	0.409157
506	3460520	PCDHA5	0.0102109	0.716585	0.00364979	0.894421	-0.0313664	0.408295	0.05831	0.129011	0.000228179	0.161253	3.32011e-05	0.646439	4.5554e-05	0.487373	-0.000174666	0.264675	-2.4732e-05	0.547359	0.00123009	0.379094	-0.0535133	0.0813436	0.066415	0.0347651
507	4250079	LOC63920	0.013442	0.61725	-0.000433393	0.986924	0.00711248	0.844649	0.0483713	0.192184	-0.000253323	0.105819	0.000188224	0.00666179	-5.73186e-05	0.35135	-5.51254e-05	0.712616	1.97069e-05	0.615071	-0.000476093	0.723088	-0.0365425	0.215669	0.00719956	0.811641
508	6980291	GPR15	-0.010895	0.803622	-0.0631384	0.144509	-0.0114371	0.848282	-0.0878142	0.145205	0.000188032	0.460398	-0.000200526	0.0754504	-3.6472e-06	0.971721	0.000551812	0.0237604	-1.33714e-05	0.835432	0.00441042	0.0449111	-0.0613891	0.201532	-0.105565	0.0325982
509	1190026	ALDH4A1	-0.141625	0.00157078	-0.145763	0.00104202	-0.138162	0.0274218	-0.0694702	0.258611	0.000109705	0.672541	2.37127e-05	0.837054	-0.000194949	0.0683671	-0.000289376	0.247749	-3.99711e-05	0.545045	-0.00318415	0.156615	-0.0420039	0.395044	-0.0187135	0.709095
510	2710341	TIGD7	0.0443203	0.233901	-0.037849	0.308741	-0.129753	0.0138031	-0.038753	0.449953	0.000210985	0.328777	-0.000135418	0.157748	-5.01668e-05	0.575115	0.000497125	0.0170024	2.78043e-05	0.613614	-0.00255295	0.17371	0.00852071	0.836119	-0.0179508	0.667426
511	7400162	KIAA1199	-0.000798348	0.979511	0.0364752	0.224524	0.0278086	0.49868	0.0759364	0.0716981	-0.000192665	0.28314	1.64207e-06	0.983621	-3.6495e-05	0.60943	0.000248304	0.150732	-3.00335e-05	0.505177	-0.00194466	0.203791	0.0338679	0.315144	-0.0154154	0.655661
512	6980129	PGK1	-0.00192472	0.962953	0.0316162	0.44748	0.0427103	0.471293	0.0178128	0.755818	-0.000149583	0.534465	-9.72733e-05	0.362002	3.37468e-05	0.736276	0.000112519	0.627844	3.585e-05	0.559665	-0.000499437	0.811635	0.000879467	0.984739	0.0107853	0.816979
513	5560600	BMP5	-0.0336255	0.192124	0.0210049	0.403769	-0.0513297	0.133749	-0.0425874	0.229054	5.97836e-05	0.690237	8.33669e-06	0.900248	-3.96904e-05	0.496407	-7.40891e-05	0.605133	3.06097e-05	0.41249	-0.000421278	0.742148	0.0141747	0.614663	0.00341774	0.905849
514	4010632	REEP4	-0.067294	0.140543	-0.142783	0.00186397	-0.142503	0.0276322	-0.0177809	0.779526	0.000306072	0.250628	-0.000264696	0.0243423	8.69006e-05	0.425334	-0.000787947	0.00200352	3.8717e-05	0.567544	0.00301173	0.194469	0.00682281	0.8929	-0.121134	0.0192862
515	1570221	PPT2	0.0200265	0.503866	0.0204181	0.486157	0.000918771	0.982052	-0.000952793	0.981376	-0.000271014	0.117345	9.10787e-05	0.237208	5.79413e-05	0.410873	-0.000108415	0.516367	0.000110697	0.0115867	0.00137995	0.353644	-0.0357057	0.275884	0.00354229	0.915515
516	3440181	PPT2	-0.0642222	0.0111585	-0.039089	0.109053	-0.0443467	0.184676	0.0100257	0.769996	-0.000315871	0.0301723	-1.73685e-05	0.789958	5.07661e-05	0.375191	0.000232513	0.0986289	-3.35302e-05	0.357481	0.00160489	0.195653	-0.0254356	0.355025	0.0408395	0.145077
517	7150121	MGAT5B	0.00234832	0.934342	-0.0285297	0.303844	-0.00948791	0.801724	-0.0143749	0.712799	-9.40608e-06	0.954699	6.76483e-05	0.357529	2.886e-05	0.654473	-0.000247683	0.118031	-1.3746e-05	0.738921	-0.00154807	0.272971	0.0138652	0.655659	0.0123383	0.698666
518	70037	WNT7A	0.0591257	0.30339	0.205291	0.00037131	0.113427	0.166515	0.0523979	0.509686	0.000613219	0.06624	0.000442255	0.00282034	-0.000231924	0.0925943	0.000153782	0.632405	-0.000299093	0.000438524	0.00550724	0.0579449	-0.0574884	0.367212	-0.0497401	0.440312
519	7550059	XKR4	-0.0627621	0.0433396	-0.0115339	0.706694	-0.0106046	0.801642	0.0267297	0.53296	-0.000214189	0.236498	7.33024e-05	0.359935	-2.53602e-05	0.723936	2.98651e-05	0.862875	6.64274e-05	0.143851	-0.00196629	0.206748	0.0232847	0.494994	-0.0119197	0.733348
520	7320703	NOL3	-0.0365039	0.271357	-0.0386289	0.227532	-0.0236851	0.589113	-0.0418995	0.351841	-0.000313181	0.101444	8.45651e-05	0.322718	-3.62845e-05	0.628864	-2.88353e-05	0.87588	5.37524e-05	0.260816	-0.00030047	0.853544	0.0037177	0.917916	0.0256361	0.48576
521	4230307	KRTAP4-5	-0.02729	0.288883	0.0149638	0.552651	-0.0539384	0.118973	-0.0104602	0.766827	7.23535e-05	0.628161	-3.47549e-05	0.600061	2.53e-06	0.96605	9.46993e-05	0.508338	-7.33541e-05	0.0506364	-0.000770365	0.547826	0.0520078	0.0643974	-0.0143333	0.619312
522	1450524	ACSM3	-0.0183125	0.501952	-0.0147461	0.578554	0.0302807	0.402357	-0.0557627	0.134341	-2.18536e-05	0.890155	2.1865e-05	0.755619	-2.45546e-05	0.695654	0.000167427	0.269318	-4.57473e-05	0.248732	-0.000381991	0.777707	-0.0272016	0.359017	0.0114459	0.707861
523	6480161	ACSM3	0.0388647	0.243955	-0.0157972	0.628425	-0.00752518	0.865149	0.0091928	0.840814	2.00904e-05	0.917579	-7.3083e-05	0.395326	0.000117394	0.126916	0.000127853	0.490281	1.09443e-05	0.821899	0.00227284	0.172145	-0.039585	0.276035	-0.0266098	0.478958
524	6550739	CASP1	0.184449	0.0102952	0.0936792	0.197	0.0179003	0.862351	-0.0212838	0.831613	-0.000247287	0.555386	-0.000254847	0.168628	-0.000157093	0.364061	0.000191177	0.634682	-6.0025e-05	0.574071	-0.00261013	0.4751	-0.010997	0.890601	-0.0856214	0.292167
525	1010278	PROP1	-0.00165338	0.955406	0.0404568	0.168038	0.0130437	0.747859	-0.0428135	0.296889	-3.70112e-05	0.830294	7.58507e-05	0.319753	-4.25471e-05	0.533046	-5.04446e-05	0.759252	-1.93732e-05	0.655057	-0.00125663	0.398894	0.0334318	0.305576	-0.0361033	0.279812
526	6650326	PRPF19	0.0312042	0.423784	0.0789363	0.043852	0.0691605	0.211537	0.013	0.809914	3.32349e-05	0.883624	0.000143893	0.15161	3.8523e-06	0.967323	2.85002e-05	0.896058	-0.000123719	0.0326366	0.000516302	0.794087	-0.0878376	0.042178	0.0182011	0.680105
527	6900209	ADRA1B	-0.0189411	0.588847	-0.0175348	0.611742	0.00355926	0.940434	0.00985678	0.838399	-0.000130246	0.523105	0.000107442	0.234314	-0.000129576	0.10882	-2.5015e-05	0.897976	4.05988e-05	0.427954	0.000845569	0.629785	0.0265402	0.490543	-0.0394515	0.316446
528	5340241	NARFL	0.0582475	0.099967	0.0526204	0.138792	0.0476789	0.341519	0.118549	0.016234	0.000129878	0.529757	0.000138704	0.128648	-7.01672e-05	0.40051	-9.58704e-05	0.627627	-2.42151e-05	0.643849	-0.000136361	0.939485	-0.0235282	0.549586	-0.0106651	0.789292
529	6350221	UCP3	0.097001	0.0057739	-0.0314491	0.352458	-0.00757934	0.870532	-0.0260426	0.5832	0.000254737	0.208028	0.000198894	0.0276813	-0.000145907	0.0718259	-9.97676e-05	0.609668	-2.87681e-05	0.57228	-0.000754128	0.661652	-0.0614934	0.106272	0.0351282	0.367052
530	4290201	TAS2R48	-0.0251012	0.373368	-0.0376833	0.17139	-0.00471155	0.900275	-0.0778418	0.0437879	3.33689e-05	0.838562	-6.80336e-05	0.348984	9.79875e-05	0.13216	3.05572e-05	0.84545	-6.73822e-05	0.101037	0.00154819	0.270022	0.0158137	0.606836	-0.00464397	0.883362
531	3830681	OR2B6	-0.00900406	0.793391	0.0393978	0.241627	0.0182037	0.691836	0.0215756	0.64824	-0.000104531	0.601426	0.000176386	0.0467043	-7.6225e-05	0.329142	0.000141286	0.45985	6.31403e-05	0.205904	0.00283906	0.0971287	-0.0446903	0.234805	0.00389581	0.919544
532	3420025	STAT6	0.0544193	0.417246	-0.0422205	0.533366	0.0649876	0.500286	0.00997896	0.91494	0.000317384	0.417425	0.000143109	0.407487	-0.000522806	0.0012108	-0.000231695	0.537276	-2.62774e-05	0.792023	-0.00280535	0.410712	-0.040603	0.58633	0.0314876	0.678033
533	940373	COL4A3BP	-0.0216627	0.718825	-0.264637	1.17193e-05	-0.253157	0.00322493	-0.246015	0.00307969	0.00075962	0.0297731	-0.000224815	0.146775	-0.000121949	0.401705	7.46128e-05	0.824761	-0.000113402	0.203643	0.000980252	0.747245	-0.0287261	0.666855	-0.00842472	0.900889
534	1300129	COL4A3BP	0.00253435	0.947411	-0.0502067	0.179461	-0.0976519	0.0598271	-0.0541208	0.299769	-9.82165e-05	0.657761	-5.18872e-05	0.599436	0.000101642	0.258085	0.000325385	0.128501	-4.55221e-05	0.416965	0.00341679	0.0721956	-0.0654067	0.11848	0.0328029	0.442873
535	50471	CACNG5	0.0368806	0.248579	0.00573373	0.853597	-0.00683785	0.873234	-0.0338265	0.436981	-0.000163885	0.374062	5.13438e-05	0.533144	5.63695e-05	0.439974	-9.12485e-05	0.608242	7.73761e-06	0.867209	0.000323779	0.837233	-0.015681	0.653191	0.0224764	0.526394
536	4280689	CACNG5	0.00105276	0.968335	0.00317059	0.902616	-0.00386807	0.914507	0.0296437	0.411727	0.000222321	0.146572	6.07275e-05	0.373389	-6.11318e-05	0.324842	3.37337e-05	0.819494	-4.21195e-05	0.277057	-0.00156582	0.233762	-0.0299484	0.301527	-0.00508741	0.86323
537	7560164	HOXC9	-0.0338896	0.297663	0.0211223	0.51417	-0.0221992	0.623248	-0.020434	0.650561	-0.000340337	0.0726529	0.000156818	0.0616025	3.84213e-06	0.95957	-0.000359275	0.0476729	-2.59421e-06	0.956755	-0.00202683	0.216286	0.0553521	0.123753	-0.0646259	0.0773402
538	6980110	PYCR1	0.000309225	0.992683	-0.00581149	0.858966	0.00449604	0.919789	0.0291467	0.524965	0.000282975	0.147053	-4.70377e-05	0.587683	-1.59129e-06	0.983747	-0.000363475	0.0523891	-0.000106993	0.0292704	-0.000331373	0.842531	-0.00917329	0.801956	0.0293471	0.435838
539	5820204	TRIM49	-6.76944e-06	0.999839	0.0256578	0.442696	-0.0057861	0.901047	0.0124059	0.789018	-2.61033e-05	0.893657	-7.2727e-05	0.399286	4.71037e-07	0.99529	6.84182e-06	0.970816	1.06256e-05	0.830266	0.000620396	0.714576	0.0123993	0.737374	0.0227605	0.549695
540	2060564	LOC492311	0.0656035	0.198701	-0.0758153	0.13913	-0.0797819	0.27011	-0.0363718	0.608073	0.000348284	0.241828	-6.11035e-05	0.642018	0.000176617	0.147003	-0.000121198	0.670801	-0.000103752	0.170281	-0.00280423	0.279083	0.0174603	0.757834	-0.0566401	0.326328
541	6370368	SLC22A17	-0.00690243	0.821808	-0.0106999	0.722375	-0.0290839	0.481224	-0.0165338	0.695098	-5.31011e-05	0.765928	-0.000109483	0.165776	9.28904e-05	0.188144	4.66544e-05	0.784373	-6.01749e-05	0.178491	-8.39517e-05	0.95629	0.0142814	0.670518	0.0194806	0.571996
542	2120348	RPL28	-0.0114283	0.816081	0.0074042	0.880937	-0.0934614	0.180738	-0.0170593	0.802557	0.000230513	0.420816	6.07613e-05	0.630713	-0.000161003	0.173992	0.000309782	0.259472	-0.000193217	0.00812288	-0.000264701	0.915585	-0.0116951	0.830115	-0.0720249	0.196538
543	2650703	NALP11	-0.00254338	0.927505	0.00599756	0.823853	-0.0119881	0.745458	-0.00431287	0.909343	0.000162052	0.314005	-1.03105e-05	0.886171	-6.37385e-05	0.313466	-9.77539e-05	0.52961	2.34314e-06	0.953578	-8.64275e-05	0.949696	0.00255306	0.933021	-0.0447642	0.148192
544	7570360	C3orf32	-0.0222018	0.446768	0.0114706	0.68291	0.063151	0.1012	-0.0236066	0.549549	0.000217612	0.195198	-7.19952e-05	0.337635	4.95053e-05	0.457871	-3.23262e-05	0.842103	-4.68515e-05	0.266461	0.00329397	0.0212136	-0.0487659	0.123234	0.0295188	0.361106
545	460392	SLAMF9	0.00496258	0.87745	0.000383357	0.990331	0.00101128	0.981555	-0.0130187	0.768291	0.000100788	0.589418	-9.30402e-05	0.261816	-4.36016e-05	0.558822	0.000101931	0.569613	-4.99808e-05	0.287833	-0.00236221	0.141238	-0.0032803	0.925936	-0.0206652	0.566324
546	60653	LRRC45	0.00576512	0.912691	-0.11013	0.0379843	0.0951077	0.207028	-0.00728474	0.920652	0.000469633	0.125522	0.000235747	0.081422	-0.000262293	0.0389733	-0.00087061	0.00309628	5.48115e-06	0.94409	0.00154866	0.562305	-0.0438992	0.452502	0.0517194	0.385386
547	4890328	LRRC45	-0.0156288	0.694933	-0.0139781	0.726124	-0.000759133	0.98918	0.016692	0.762963	0.00024552	0.290832	8.27154e-05	0.420212	-0.000213274	0.0241035	-0.000358218	0.107255	2.1826e-05	0.711306	0.000751122	0.710155	-0.00243362	0.95603	-0.00103989	0.981621
548	6960497	C9orf27	0.00166309	0.954401	-0.00782772	0.782368	0.0576139	0.14117	-0.0411176	0.299707	8.58803e-05	0.608881	8.39946e-06	0.910793	7.84157e-06	0.90626	-5.07146e-05	0.754278	-2.16691e-05	0.607344	0.000524737	0.714887	0.0112641	0.723124	-0.0428566	0.18458
549	2970044	MRPS21	-0.113227	0.000392866	-0.0710228	0.026878	-0.130898	0.00374918	-0.204137	4.12759e-06	2.04054e-05	0.912725	1.14858e-05	0.888824	-4.21078e-05	0.583767	0.000136509	0.444372	-3.54008e-05	0.455465	0.000215184	0.894556	0.0261584	0.459925	-0.0383685	0.290728
550	540187	SUPT3H	-0.0126281	0.717658	0.00443958	0.899036	-0.034994	0.479977	-0.006964	0.88533	4.05155e-05	0.841814	-3.81233e-05	0.671494	-4.60502e-05	0.583369	9.31761e-05	0.633335	-1.65272e-05	0.749454	-0.000200156	0.909776	0.0410453	0.288707	-0.0139739	0.722391
551	7330176	DSCR9	0.0275363	0.313647	0.0320066	0.227812	0.017491	0.628998	0.0580744	0.118443	0.000197586	0.21188	-6.38581e-05	0.363858	4.14468e-06	0.947837	-4.48407e-05	0.767777	5.90229e-06	0.882119	0.000819186	0.545064	0.00877151	0.767375	-0.0037445	0.902475
552	1780072	CDC42EP3	0.00524291	0.944491	0.0513133	0.498195	-0.0707732	0.511066	-0.187974	0.0716277	-0.000674962	0.123383	-0.000276301	0.153914	-0.000113418	0.533341	0.00109535	0.0093732	-2.5305e-05	0.820969	0.00513282	0.178644	0.0259588	0.756112	-0.0308781	0.716376
553	3400180	C16orf60	-0.224262	0.0441099	-0.163483	0.146255	-0.190622	0.23465	0.0899119	0.561983	-0.000635365	0.327872	-0.000422881	0.141122	0.000706143	0.00818388	-0.000334442	0.591833	0.00013315	0.420501	0.000210679	0.970277	0.105817	0.393439	-0.0638347	0.610309
554	610670	MME	-0.0165626	0.63596	0.000880366	0.979531	0.0324469	0.498193	-0.0476978	0.317397	0.000276334	0.171721	-1.67691e-05	0.85215	-7.1412e-06	0.931154	-0.000119709	0.539666	-6.44842e-05	0.20875	0.00106854	0.539303	0.0129498	0.735346	0.0162763	0.676696
555	1470709	TLE1	0.00117271	0.986361	0.00845386	0.90261	-0.0244254	0.804083	0.0227421	0.811036	-0.000635918	0.111011	-0.000150355	0.39536	-0.000174213	0.290519	0.000921462	0.016426	0.000471276	3.59408e-06	-0.00108932	0.753894	-0.0341375	0.654425	0.0588119	0.445004
556	2470592	CHKB	-0.0390062	0.628337	-0.0230666	0.776723	-0.139636	0.228303	-0.169639	0.130006	0.000366162	0.435356	5.84143e-05	0.7785	-3.93393e-05	0.839069	-0.00060235	0.181861	2.14559e-05	0.857632	0.00176905	0.665238	0.0745339	0.405694	0.023613	0.794672
557	7400709	HPN	0.00493789	0.854252	0.0446567	0.0884037	-0.0900112	0.012985	-0.000858698	0.981312	0.000178226	0.250667	-4.63928e-05	0.503155	9.34427e-05	0.129256	0.000111805	0.455336	-1.39207e-05	0.721076	0.000374487	0.777998	0.0202896	0.49006	-0.0160631	0.590604
558	1110167	C2orf28	-0.182726	0.000441027	-0.139595	0.00755314	-0.143204	0.0533514	-0.282664	8.70538e-05	0.000352858	0.243447	6.22918e-05	0.641506	-0.000135408	0.28074	0.000154958	0.594321	-8.38126e-05	0.277578	0.000861899	0.743631	-0.0242322	0.674366	-0.0544726	0.353586
559	2320041	ELP3	0.181116	0.000232011	0.0530865	0.284588	0.15319	0.0296693	0.163159	0.0170204	-0.000217045	0.448996	-1.77451e-05	0.888537	8.43924e-05	0.477297	0.000252092	0.359891	9.21661e-05	0.207402	0.000222214	0.929152	0.0407114	0.456399	-0.019913	0.720598
560	2100451	MGC34732	0.0392535	0.212639	0.0215967	0.490419	0.11902	0.00636828	0.0904584	0.0380227	0.000340875	0.0631888	-4.70335e-05	0.562193	-7.01773e-05	0.341223	6.27814e-05	0.720668	-6.32351e-05	0.172463	-0.00145587	0.35909	-0.0148826	0.668549	-0.00616069	0.862239
561	2260347	OR5J2	0.0175624	0.541108	0.0558133	0.0473967	0.092615	0.0158458	-0.00121248	0.975558	-5.34306e-05	0.749609	-0.000164042	0.0269177	3.52161e-05	0.589544	0.000192002	0.229475	-9.69061e-08	0.998148	0.000378121	0.791734	0.0475626	0.13052	-0.0308532	0.339183
562	360598	MGC4268	0.130987	0.00213684	0.00257634	0.950914	0.065457	0.248523	0.121062	0.0393794	-0.000341464	0.170075	-7.8008e-05	0.478411	0.000328205	0.000780324	-7.15422e-05	0.762773	0.000171919	0.00565116	9.33422e-05	0.9651	-0.0252473	0.587931	-0.017534	0.716038
563	730202	CDO1	0.0807401	0.0380624	-0.012145	0.753287	0.044275	0.415787	0.0322406	0.54665	0.000334224	0.138423	2.04919e-05	0.838023	-7.2168e-05	0.435327	-9.80229e-05	0.652203	-4.8351e-05	0.399009	-0.00167225	0.391788	-0.00131088	0.975642	0.0440621	0.311644
564	4730528	LOC399947	-0.0131385	0.60402	-0.0310315	0.207874	-0.00805598	0.810384	0.074615	0.0310392	-8.21353e-06	0.955427	-0.000107062	0.100933	3.36301e-05	0.562283	0.000276562	0.0494988	2.82191e-05	0.442931	0.00270733	0.0310354	-0.0540334	0.0499275	0.0460705	0.104015
565	20735	SLC6A16	0.0520836	0.304951	0.0978754	0.0559346	0.0192411	0.790948	0.00694448	0.921662	-0.000172545	0.560007	2.05536e-05	0.874986	-7.49301e-05	0.540486	0.00164614	6.7832e-09	-0.000154768	0.0402501	-0.00171068	0.507636	0.0562689	0.318514	0.0797107	0.166116
566	6180296	KIAA2026	0.0803361	0.017111	0.044652	0.184452	0.100403	0.0323516	0.0796527	0.0876445	-0.000355707	0.0699819	0.000162073	0.0615888	-4.23873e-05	0.597786	-3.99314e-05	0.831785	0.000153568	0.00207146	-0.00162155	0.342135	-0.0430519	0.247116	0.0948816	0.0131756
567	240131	CYP2S1	-0.255446	0.000763667	-0.351824	4.2951e-06	-0.256458	0.0182313	-0.300824	0.00436932	0.000900352	0.0418553	-0.000384412	0.0490889	-0.000104575	0.567484	-0.00058234	0.170246	-0.000103271	0.359775	-0.00190525	0.621385	-0.0230608	0.784527	-0.0241489	0.778632
568	830372	OR4E2	0.0353254	0.265455	-0.0227737	0.458137	0.0455857	0.279936	0.0529639	0.218875	0.000236975	0.194834	-0.000139366	0.0882207	6.61286e-05	0.35885	9.7261e-05	0.58173	1.30427e-05	0.775773	0.00187797	0.228346	-0.0143363	0.678156	0.0354433	0.313532
569	2650347	PFKFB2	-0.00202038	0.955684	-0.0582739	0.108096	-0.0947237	0.0621242	-0.0736905	0.142346	0.000383072	0.0701041	-4.0424e-05	0.665622	-9.82417e-05	0.257958	1.72829e-05	0.932143	-6.82757e-05	0.204321	-0.00466616	0.0111099	0.0137741	0.731425	-0.0374892	0.361954
570	6590307	PFKFB2	0.00848848	0.772351	0.0315909	0.26743	0.157258	5.76206e-05	-0.0229027	0.565832	0.000324777	0.0555631	1.81559e-05	0.809887	-0.000139802	0.0402007	0.000104056	0.523685	-3.56026e-05	0.404902	0.000113954	0.937411	-0.0147226	0.644229	0.0186982	0.567795
571	3140056	OR11L1	0.0200213	0.490239	0.0414865	0.139417	-0.0024369	0.949376	0.00534024	0.892368	2.5777e-05	0.877813	2.27275e-05	0.761179	4.63464e-05	0.481384	-8.46234e-05	0.600009	2.81209e-05	0.502139	-0.000278115	0.845606	0.063084	0.045622	-0.0326275	0.311736
572	4780709	GPR89A	0.0821647	0.147829	-0.039629	0.486899	0.133388	0.100356	-0.096071	0.220705	-0.000385772	0.242206	0.000152442	0.297034	0.000113248	0.409624	0.000664604	0.0366286	6.14946e-05	0.465164	0.00130701	0.64889	-0.0513828	0.414567	0.0686694	0.282189
573	7150243	FRMD5	-0.0430964	0.169167	-0.0154522	0.611724	-9.43441e-05	0.998187	-0.0325636	0.446512	2.35475e-05	0.896872	0.000118066	0.143807	-1.83271e-05	0.797711	-8.72925e-05	0.616379	9.6033e-06	0.832556	-0.00105962	0.494264	0.00340656	0.92044	-0.00761885	0.827659
574	1580673	GALM	0.164965	0.055675	0.0800237	0.357901	0.139652	0.259354	0.178279	0.13802	-0.000336599	0.503554	0.000265444	0.232571	-1.21571e-05	0.952831	-0.000125916	0.7939	5.63088e-05	0.65979	-0.00260653	0.552308	0.154104	0.108328	0.0471671	0.627054
575	2470341	SNX22	-0.14751	0.00505966	-0.123679	0.0189656	-0.0576046	0.441264	-0.0604794	0.405444	8.25539e-05	0.787075	1.74443e-05	0.897645	-0.000289795	0.0215664	0.00125855	1.91023e-05	-0.000100727	0.195711	5.33396e-05	0.983982	0.0343528	0.555915	0.0710503	0.228607
576	6370138	ATG10	0.137579	0.0721216	0.174253	0.0231835	0.188952	0.0836503	0.342439	0.00119146	-0.000608621	0.170842	0.000486861	0.0134512	-5.8222e-05	0.752881	-0.000188343	0.66022	-1.59945e-05	0.887849	-0.00650993	0.0922672	0.0649797	0.44369	0.0117131	0.891678
577	2570129	PGM5	-0.0918485	0.0169314	-0.0971887	0.00940929	-0.134348	0.00874578	-0.0860693	0.101637	-0.000384999	0.0840356	5.19122e-05	0.600624	-0.000116321	0.183009	0.000199764	0.350454	1.92122e-05	0.73007	0.00212048	0.265061	-0.0937874	0.0254507	0.00363444	0.932454
578	4640332	PGM5	-0.019542	0.495443	-0.0192578	0.494011	-0.00137408	0.971721	-0.0199473	0.612169	-2.69125e-05	0.871587	8.69562e-05	0.238891	2.09239e-05	0.753493	2.58382e-05	0.871373	5.89984e-05	0.159337	0.00110819	0.43889	-0.00603841	0.847371	0.00806966	0.802066
579	2600377	NUBP2	0.0302251	0.339848	0.0175033	0.573491	-0.0102403	0.808409	0.0294875	0.498483	-3.06808e-05	0.867965	9.66337e-05	0.236577	-3.13293e-05	0.668506	-0.000104238	0.553641	2.69379e-05	0.560155	-7.16843e-05	0.963939	0.00783473	0.820697	-0.0233006	0.515081
580	450220	TTN	0.00681933	0.825919	-0.0038939	0.896042	0.0371687	0.363784	0.00856036	0.837897	-0.000139844	0.433408	7.04679e-05	0.376531	-1.13934e-05	0.873431	-7.60851e-05	0.658904	-8.38367e-06	0.852025	-0.000660185	0.663908	0.0209486	0.532418	-0.0252234	0.462843
581	6520685	HRB	-0.0495793	0.23629	0.0331507	0.428067	0.0205824	0.728709	0.0955557	0.0975086	-0.000173908	0.474064	-3.64309e-05	0.735272	-9.19201e-05	0.362615	0.000109217	0.641092	2.74166e-05	0.65817	-0.00135859	0.519857	0.0849583	0.0666212	-0.0834637	0.0758504
582	1660445	PCNXL2	0.0609826	0.172899	0.13209	0.00340394	0.172511	0.00687316	0.0987842	0.112296	-0.000196684	0.450933	0.000307645	0.00751901	-4.97304e-05	0.645205	-0.000207732	0.406481	-5.66041e-05	0.394769	0.000353981	0.876425	-0.0144486	0.77121	0.0886448	0.0811277
583	6290209	AKAP1	0.0576757	0.0585586	0.00340107	0.911666	0.0738749	0.0863655	0.0163108	0.700889	0.000208233	0.242371	6.87252e-05	0.381227	1.73052e-05	0.812008	-0.000244423	0.151019	1.7453e-06	0.969229	-0.00159387	0.304766	0.0240793	0.476785	-0.0764993	0.0276337
584	7000187	BPIL3	-0.00272276	0.911403	0.019291	0.413147	-0.00915472	0.776982	0.0758444	0.0220543	-0.000174458	0.215598	-5.98292e-05	0.342414	1.7653e-05	0.750666	5.30602e-05	0.696659	3.39735e-05	0.335515	0.0017438	0.145851	-0.020106	0.449211	0.000476064	0.985985
585	6400196	MYO1C	0.00254267	0.946456	-0.03396	0.360568	0.0384026	0.449691	0.150919	0.00375599	-0.000327308	0.13745	-3.6494e-05	0.708481	-1.93997e-05	0.823439	0.000486747	0.0208022	5.26358e-06	0.924004	0.00091233	0.629288	-0.0110991	0.788752	0.0734104	0.0846484
586	7560241	DXS9879E	-0.0872873	0.0577293	-0.0918768	0.0471024	-0.0378022	0.566413	-0.038304	0.547679	0.000201197	0.451876	0.000211938	0.0738353	-0.00021009	0.0577465	-0.000191225	0.457764	-1.45337e-05	0.831231	-0.00393566	0.0909744	-0.00991791	0.846106	0.0336115	0.515261
587	1050189	IXL	0.0454162	0.266727	0.0416128	0.311329	0.0791711	0.175386	0.187563	0.00092778	2.14133e-05	0.928256	-4.79782e-05	0.648692	0.000115481	0.240988	-0.000182219	0.425914	0.000120669	0.0466439	0.00350518	0.0905195	-0.00597133	0.895334	-0.00518111	0.910376
588	7150364	GPR137B	-0.0420895	0.544048	0.0624706	0.372449	0.032092	0.747559	0.0668831	0.48834	-0.000459	0.256323	-0.000510247	0.00430447	0.000743057	8.48605e-06	-0.00019684	0.612256	0.000104205	0.311737	0.00481465	0.17172	-0.0863886	0.262895	-0.00331406	0.96622
589	3360152	ARF1	-0.00583581	0.845591	-0.0290319	0.319807	0.0333749	0.409703	-0.0177051	0.663745	-0.000115148	0.505479	2.1112e-05	0.784121	-1.27268e-05	0.855739	0.0002901	0.0822808	3.3785e-05	0.439719	0.00162134	0.274073	-0.0798955	0.0145165	0.104199	0.00177528
590	650592	CECR1	0.0287063	0.680853	0.021014	0.764389	0.0853762	0.392769	-0.214229	0.0263811	0.000503971	0.214019	-0.000234342	0.192253	-0.000120573	0.475307	0.00041444	0.289173	-0.0001492	0.149548	0.000609227	0.862973	0.0165284	0.830997	-0.00564188	0.942717
591	5560280	CECR1	0.0309325	0.617054	0.0931377	0.133926	0.136419	0.123377	0.0490899	0.565917	0.000376283	0.295222	-6.25063e-05	0.694766	-0.000315829	0.0348528	0.000232029	0.503153	-0.00023291	0.0111403	-0.000632427	0.839808	0.0438873	0.522587	-0.0136237	0.844784
592	5090739	KLHL3	0.137594	0.054393	0.215407	0.00287296	0.114509	0.265609	0.117586	0.237724	0.000497974	0.232604	0.00037802	0.0402465	-0.00027269	0.112856	0.000657572	0.100565	-0.000375115	0.000412709	-0.0114518	0.00162442	0.0397575	0.61732	-0.0410056	0.611446
593	6980142	TPSG1	0.0246482	0.391459	0.0148761	0.591543	-0.0124639	0.74288	-0.0268044	0.491575	0.000173848	0.293805	3.36949e-05	0.649338	-1.04707e-05	0.872144	-0.000100455	0.530116	5.44367e-05	0.188684	0.00216557	0.124444	-0.00913102	0.770178	-0.0402507	0.206359
594	4120437	MDS032	-0.0320782	0.377578	0.0515739	0.156972	-0.0258993	0.612247	-0.0507898	0.313838	8.46392e-05	0.689602	-8.57303e-05	0.359404	7.3653e-05	0.397484	0.000324004	0.110463	-0.000119272	0.0269336	-0.000935693	0.612242	0.04087	0.309807	-0.0118356	0.774554
595	3400544	POLG2	0.0714693	0.195783	-0.0501913	0.365897	-0.0523264	0.50491	-0.0295464	0.699814	9.17938e-05	0.775404	0.000227917	0.108861	-8.473e-05	0.523869	0.000207922	0.500863	-2.04888e-05	0.802702	-0.00766447	0.00625829	0.0702173	0.251741	-0.0146584	0.814641
596	2970768	EIF4A1	0.043605	0.0994332	0.0532676	0.0430483	0.0592034	0.111454	0.0807498	0.0264065	-0.00025742	0.0933661	0.000120941	0.0757839	-0.000144833	0.0224741	-1.85652e-05	0.90016	-1.89628e-05	0.627516	-0.00397077	0.00284089	0.0391866	0.179794	0.0131675	0.657154
597	5090209	GPA33	0.143977	0.00888729	0.128604	0.0203005	0.0422541	0.591564	-0.00588913	0.938561	3.59066e-05	0.910776	0.000340845	0.0161813	-0.00040823	0.00203237	0.000765137	0.0129511	-0.000133629	0.101797	-0.00644328	0.0209964	0.167626	0.00611183	0.0362083	0.559393
598	5700292	SLC14A1	0.135201	0.0337079	0.099091	0.121509	0.230256	0.0112772	0.0884987	0.316318	-0.000325951	0.378638	0.000290968	0.0766339	9.21617e-05	0.542323	-0.000273602	0.442264	0.000180583	0.0550528	-0.00131779	0.682184	0.00130691	0.98526	0.00863901	0.903495
599	6100091	EGR2	0.105619	0.398901	-0.125298	0.321692	-0.248032	0.168836	0.438105	0.0118949	0.000229041	0.753566	-0.000193777	0.548386	-0.000473522	0.114983	-0.000521051	0.457394	-0.000145715	0.43283	0.0135064	0.0334892	-0.247244	0.0759736	-0.043916	0.755167
600	430600	CDH16	0.0560686	0.100309	0.0194419	0.557798	-0.00354181	0.937947	-0.0145352	0.754968	0.000134812	0.494656	-0.000110745	0.208004	2.83372e-06	0.970858	-0.000181984	0.337762	4.11277e-06	0.933622	-0.00168054	0.318752	0.0253296	0.496236	-0.00571319	0.880434
601	1070403	GAS6	0.00456452	0.951281	-0.00141991	0.98498	-0.00739401	0.945115	-0.0370026	0.72178	-0.000178199	0.682317	4.43955e-05	0.817578	-2.77447e-05	0.877339	-0.000310741	0.457535	-0.000110405	0.319587	-0.00317135	0.403044	0.0678618	0.414103	-0.148127	0.078703
602	2100739	GAS6	-0.0328158	0.337921	-0.0233745	0.477933	-0.0757871	0.0936511	-0.0839487	0.0696145	6.25149e-05	0.751151	-6.58041e-05	0.455039	8.53487e-05	0.276471	-4.90588e-05	0.796683	-5.01167e-05	0.311429	0.00183627	0.273663	0.0270971	0.465274	0.00959965	0.800203
603	7320593	AHCY	-0.131914	0.00534929	-0.135899	0.0043503	-0.171679	0.0114964	-0.0965419	0.141046	0.000722832	0.0086732	-0.000151672	0.213901	-0.000203221	0.0753624	7.33096e-05	0.782278	-0.000307084	1.23815e-05	-0.00116971	0.625661	-0.0446893	0.395643	-0.0364339	0.493871
604	2190373	EXTL3	-0.0177493	0.709981	-0.0791328	0.100364	-0.0459079	0.502523	0.0534328	0.42082	0.000227539	0.413388	-5.80798e-05	0.636458	-6.30796e-05	0.583437	-0.000969307	0.00028499	0.000246177	0.000516487	0.00236273	0.329816	-0.062224	0.240892	0.0658126	0.222477
605	4200504	MAGI3	-0.0402632	0.122771	0.0591786	0.020205	0.128758	0.000200815	-0.00790027	0.825299	-0.000170083	0.262494	7.02849e-05	0.296085	-5.25853e-05	0.378057	0.000170157	0.240539	4.70507e-05	0.214624	-0.000394806	0.76105	-0.00500279	0.860382	-0.0389095	0.184353
606	5220575	MAGI3	0.0322346	0.311006	0.0328904	0.296101	0.0350518	0.42173	0.0454906	0.300468	0.000199693	0.280886	-0.000106226	0.195163	2.94559e-05	0.690322	0.000119927	0.498688	-4.16553e-07	0.992876	6.5293e-05	0.967389	0.0469343	0.180174	-0.0317848	0.374428
607	2120367	MBD3L1	-0.00171395	0.952135	-0.0189946	0.495535	-0.0441159	0.244227	0.0425667	0.277945	5.06051e-06	0.975714	7.20536e-06	0.922086	8.38961e-05	0.19398	2.02091e-05	0.898666	3.74586e-06	0.927848	0.000356811	0.801419	-0.0181261	0.561081	-0.00029287	0.992704
608	4730020	PLCD4	0.0276135	0.32459	0.00859296	0.757031	-0.0431873	0.260022	-0.0360375	0.353802	-9.93213e-05	0.543875	-4.25391e-05	0.556186	6.72264e-05	0.29796	-5.51092e-06	0.971827	2.59923e-05	0.526734	0.00062726	0.656418	0.00100287	0.974111	0.0181305	0.566569
609	1240646	MSTO1	0.0916758	0.100802	0.0314554	0.574409	0.0610236	0.435532	0.0871946	0.261295	-0.000235571	0.470093	-0.000104767	0.466231	0.000270719	0.0422755	6.19098e-05	0.842576	2.53203e-05	0.759807	-0.00103198	0.716513	0.0850688	0.169067	0.053446	0.401758
610	830373	PDLIM2	-0.010171	0.688031	0.00548059	0.82479	-0.002931	0.930536	-0.0579393	0.0964172	-0.000331527	0.024703	5.20533e-05	0.425812	0.00012513	0.0289769	5.56227e-05	0.692748	2.00247e-05	0.585501	0.00010786	0.931791	-0.0334654	0.226696	0.0378311	0.183649
611	6060097	TIE1	-0.00524061	0.873359	6.01398e-05	0.998526	0.0394142	0.389689	0.0118444	0.792695	-0.000125852	0.508599	-1.51067e-05	0.85826	5.30218e-05	0.499229	2.89783e-05	0.874653	8.48573e-06	0.860942	0.000969127	0.556366	-0.0277518	0.443299	0.0784547	0.033009
612	130192	ACSM3	-0.0175752	0.603678	-0.0452176	0.181205	-0.13332	0.00542766	-0.0959292	0.0396959	0.000219157	0.264608	2.33847e-05	0.788449	1.18109e-05	0.884793	0.000244339	0.197107	-0.000108441	0.0303997	-0.00226109	0.185252	0.00619169	0.868703	-0.0552258	0.146176
613	940162	CARD4	0.0262878	0.518249	-0.025891	0.523253	0.00504451	0.929237	0.0521457	0.353229	-0.000133795	0.571741	8.05445e-05	0.441632	-0.000110799	0.254417	-1.43994e-05	0.949461	1.24446e-05	0.836184	-0.00181557	0.37698	-0.0446377	0.320102	0.053003	0.249041
614	5870168	SMPD1	0.00237196	0.949934	0.0425041	0.258678	0.0801595	0.132213	0.084452	0.103956	-0.000455257	0.0376751	-1.42087e-05	0.883783	0.000113848	0.210284	-9.36552e-05	0.657598	1.23053e-05	0.82559	-0.00119753	0.528753	-0.00528664	0.899176	0.0866605	0.0408818
615	540711	TRAF6	0.0118747	0.699745	0.0952788	0.00213436	0.0728162	0.0968593	0.10673	0.0127475	-4.0079e-05	0.823472	4.46823e-05	0.572797	-5.89955e-05	0.425406	0.000266448	0.121583	-4.23731e-05	0.354322	0.000527257	0.736573	-0.00351479	0.918147	0.0344868	0.32408
616	6270246	CCR4	0.0646954	0.164012	0.116199	0.0127991	0.0287687	0.664322	0.0257576	0.689112	-8.97481e-05	0.739786	0.000123725	0.302163	-0.000107926	0.330616	0.000373068	0.151368	-1.35659e-05	0.843616	0.00555197	0.0181381	0.028386	0.582339	-0.0250105	0.631061
617	6280575	DNAJA3	0.173067	0.00275229	0.0971998	0.0949611	0.129999	0.117307	0.0913679	0.254108	0.000167098	0.619169	0.000467398	0.00170804	-0.000229992	0.0984454	0.000454094	0.160683	-0.000140517	0.101203	-0.0069056	0.0183239	0.000473608	0.994118	-0.0151895	0.81505
618	6400019	PADI3	-0.0153532	0.606329	-0.0250203	0.393694	-0.0268016	0.512059	-0.0457574	0.262713	-0.000142586	0.408054	5.49322e-05	0.474618	-3.98853e-05	0.563478	-5.74704e-05	0.729497	3.28134e-05	0.450499	7.45872e-05	0.959883	-0.0194752	0.552102	-0.010922	0.741998
619	7200400	WDR45L	-0.086046	0.0450635	-0.0329463	0.442969	-0.0349938	0.565476	0.0339462	0.56661	-0.000387269	0.120256	-3.76434e-05	0.733594	1.84248e-05	0.858014	-0.000130459	0.587025	5.73583e-05	0.366384	0.000987199	0.648526	-0.00673597	0.887344	-0.00094604	0.984327
620	3370687	SCAMP3	0.144611	0.000237259	0.120182	0.00244477	0.0968429	0.0851241	0.145137	0.00796287	6.05411e-05	0.791786	3.93583e-05	0.697456	7.28383e-05	0.442679	-0.000163394	0.457875	-6.79256e-07	0.99073	0.00179141	0.370356	0.00557647	0.898473	-0.0130931	0.768925
621	6420242	ALG3	0.036375	0.203419	0.0537167	0.0515686	0.0401148	0.288516	0.0132445	0.732705	0.000208404	0.206314	6.28625e-05	0.393386	-1.92588e-05	0.767135	-4.06179e-05	0.798433	3.29215e-05	0.425212	0.000922032	0.511383	0.00308586	0.920862	0.00696762	0.826167
622	7380347	ALG3	0.0380374	0.239408	-0.0452834	0.165567	0.0201291	0.664244	-0.0165263	0.713696	0.000400415	0.0338384	1.46521e-06	0.985956	-0.000144792	0.062838	-0.00022192	0.219889	-0.000108845	0.0234823	-0.00333353	0.0427638	0.0039595	0.912317	-0.0539491	0.140752
623	7150221	CKB	-0.118845	0.053001	0.0193155	0.754058	0.0856006	0.329285	0.0254647	0.764189	0.00026783	0.452957	-5.76598e-05	0.715501	0.000116416	0.432274	-0.000438383	0.202435	-3.22757e-05	0.722964	0.0099558	0.00134622	-0.096794	0.155438	0.00168648	0.980508
624	3930008	GSDM1	0.0590513	0.0528256	0.0462982	0.115567	-0.002544	0.949664	0.0871422	0.0351392	-1.38926e-05	0.93699	-5.25179e-05	0.503937	-2.68167e-07	0.996898	0.000176086	0.299274	3.8891e-05	0.376008	0.000537685	0.71929	0.0101362	0.759785	0.0169424	0.616198
625	1170743	ATF4	-0.0565521	0.0851486	-0.0089362	0.784529	-0.0388073	0.389845	-0.0160888	0.723542	-8.20543e-05	0.668572	-5.18861e-05	0.539702	-4.65871e-05	0.547399	0.000292301	0.11018	-3.6256e-05	0.454168	-0.00288625	0.0825232	0.0271687	0.452758	0.0748493	0.0453074
626	2900170	ATF4	-0.246074	0.00358521	-0.169898	0.0449993	-0.153198	0.20407	-0.353991	0.00241203	0.000162418	0.740686	0.000148897	0.493643	-0.000404454	0.0478014	0.000577121	0.222596	-0.000119201	0.341302	-0.00118984	0.780517	0.0602334	0.52023	0.0218436	0.818157
627	520544	ZNF440L	0.260449	0.000161977	0.107412	0.123639	0.239452	0.0159127	0.343484	0.000353574	-1.38097e-05	0.972648	0.000211529	0.234481	-4.75731e-05	0.77447	-8.90271e-05	0.817876	-0.000138281	0.177435	-0.00672262	0.0553039	0.00849672	0.911926	-0.0285197	0.714339
628	940100	LTA4H	-0.161994	0.0217392	-0.23637	0.000884472	-0.189988	0.0610082	-0.12501	0.20127	0.000399213	0.330864	-3.37261e-05	0.852928	-0.000434026	0.0107836	0.000159227	0.687201	-0.00023282	0.0262053	-0.00319561	0.371328	-0.0643399	0.412156	-0.105365	0.184244
629	2750500	POU3F3	0.0286902	0.297681	0.0277791	0.294987	0.0776956	0.0327111	0.0795078	0.0329077	6.92914e-05	0.662196	-1.15943e-06	0.986956	-1.21188e-05	0.846803	6.83817e-05	0.65538	2.10017e-06	0.957868	0.00163875	0.224707	0.00364128	0.903049	-0.0173717	0.569141
630	3190102	HS2ST1	-0.0335353	0.467976	-0.0541433	0.233537	-0.0776461	0.208308	-0.0265413	0.676246	0.00034402	0.201364	-0.000155509	0.191665	1.23567e-05	0.908583	0.000162316	0.527332	3.76087e-05	0.5782	0.000588743	0.799603	0.0153207	0.761228	-0.00393014	0.940157
631	4850168	ZNF229	-0.0496986	0.069398	0.00235575	0.929592	-0.0200554	0.580571	-0.0141619	0.705229	-1.17303e-06	0.994111	7.32391e-07	0.991715	3.72708e-05	0.552181	-0.000168522	0.267897	-1.68616e-05	0.67148	0.000460594	0.73457	0.0459905	0.122697	-0.0583063	0.057259
632	5360753	C6orf84	0.0350162	0.403716	-0.0797752	0.0502371	-0.0550915	0.326745	-0.151643	0.00788829	0.000130175	0.590417	4.49203e-05	0.677697	-0.000110029	0.250315	-3.30952e-05	0.887305	6.68451e-05	0.270735	0.00158595	0.442915	-0.0727312	0.112066	0.0118489	0.799035
633	2370576	GPR84	0.338585	0.0713553	0.954405	4.76507e-07	0.290933	0.281688	0.67763	0.00945775	-0.0025379	0.0202699	-1.95135e-05	0.96789	8.94241e-05	0.841932	0.000406413	0.698892	-0.000428471	0.123729	0.00846997	0.3738	-0.107704	0.60645	-0.0027398	0.989609
634	5090202	KIAA1838	0.166622	0.00095153	0.174838	0.000586332	0.193376	0.00748253	0.0663488	0.344201	3.33588e-05	0.909628	0.000111909	0.389012	-4.23951e-05	0.726055	0.000109963	0.696651	-5.5888e-06	0.94048	-0.000786011	0.758923	0.00518229	0.926363	0.028377	0.617693
635	3400706	ZNF643	0.0523128	0.122562	-0.0220285	0.50474	-0.0450481	0.325012	0.00752981	0.870288	0.000111404	0.568867	3.57944e-05	0.681458	-7.70743e-05	0.327013	-9.60362e-05	0.610912	4.81114e-06	0.922328	-0.00126709	0.449599	0.0208919	0.572298	-0.0370471	0.325464
636	5890520	DUS1L	-0.0676656	0.118528	0.0280655	0.518279	-0.0190854	0.754262	0.0404109	0.501338	-7.49953e-06	0.976315	0.000189843	0.0887152	-3.96774e-05	0.702512	-0.000209392	0.387068	-6.46973e-05	0.314201	-0.000818199	0.709981	-0.0592261	0.217044	0.00416789	0.932532
637	3780678	AKAP4	0.0455311	0.0778085	0.0108817	0.664148	0.0450182	0.189021	0.025366	0.470209	-9.82206e-05	0.510948	6.1462e-05	0.35488	2.37246e-05	0.691382	-4.54194e-05	0.75164	5.16138e-05	0.169599	-0.000197516	0.877122	0.00688302	0.80606	-0.0228167	0.428683
638	7610605	AKAP4	-0.0329311	0.184452	-0.0218779	0.366736	0.0211567	0.522502	0.0399692	0.238816	6.09221e-05	0.672321	9.57569e-06	0.880868	1.78087e-05	0.757118	-6.92765e-05	0.615509	7.87656e-07	0.982647	0.000647236	0.600341	-0.00244607	0.92785	0.0202716	0.466853
639	4180170	UBXD1	-0.0353157	0.396567	0.00175349	0.966561	0.165322	0.00548729	0.0899647	0.118223	0.000169834	0.482937	-4.81573e-05	0.653465	1.87411e-05	0.852297	-0.000157399	0.499853	-2.49764e-05	0.685991	0.000328249	0.87619	0.0440563	0.340417	-0.0291951	0.533226
640	270403	RPL29	-0.0823576	0.0307613	-0.112435	0.00322195	-0.0746146	0.164211	-0.0870682	0.100639	0.000337724	0.12894	-9.90362e-05	0.313653	4.13109e-05	0.644443	-0.00012275	0.563913	5.73289e-07	0.991874	0.000758427	0.694339	-0.0362039	0.391792	0.0223109	0.603414
641	630634	TMEM106A	0.139721	4.46155e-05	0.0381226	0.259049	0.0747103	0.109646	0.0651686	0.166373	-0.000111999	0.573446	6.58862e-06	0.940407	0.000122276	0.127003	0.000237947	0.212025	3.68818e-06	0.941465	0.00170924	0.319243	-0.0679082	0.0705754	0.0397817	0.301834
642	50397	FAM105A	-0.174279	0.000155942	-0.118588	0.0108387	-0.0682015	0.302085	-0.0886353	0.16707	-0.000177435	0.509254	-0.000111798	0.345866	0.000130867	0.239559	-0.000300939	0.243351	4.22145e-05	0.537769	-0.00435687	0.0630895	0.0665677	0.193847	-0.112583	0.0311901
643	5820019	ZNF257	0.0205209	0.497187	0.0253523	0.38788	0.0165094	0.680063	-0.0662076	0.10905	-4.26802e-05	0.80761	-1.2663e-05	0.870943	-1.13126e-05	0.868594	0.000136881	0.415339	-2.14925e-05	0.622781	0.00097619	0.513519	-0.04714	0.152433	0.0306777	0.362973
644	2350377	PRIC285	0.191644	0.0102746	0.209553	0.00535085	0.33098	0.00203881	0.283093	0.00626576	-1.084e-05	0.980092	5.25887e-05	0.784754	6.10164e-05	0.734064	-1.20059e-06	0.997709	7.48379e-05	0.49921	-0.00457589	0.22641	0.204579	0.0137429	0.0257013	0.75924
645	5490736	CIDEC	-0.0236912	0.448981	0.00169616	0.955056	0.0504391	0.223307	0.045565	0.280431	-0.000120184	0.504701	6.81247e-05	0.396708	-0.000101297	0.162888	1.8619e-06	0.991462	-3.41948e-06	0.940031	0.000932894	0.543259	0.0387008	0.253173	0.0257955	0.457023
646	6020564	STK32A	0.00791618	0.770543	0.0107197	0.681491	-0.0100079	0.780036	-0.0186108	0.612	-9.2034e-07	0.9953	-2.15552e-05	0.757592	-2.17737e-05	0.725461	0.000157732	0.295999	-4.09922e-05	0.2958	0.000330229	0.803855	0.000767526	0.979193	0.00285826	0.924253
647	2630524	ADCK2	-0.0382341	0.371798	-0.0557174	0.19552	-0.00450911	0.941212	-0.068064	0.251783	0.000405719	0.10335	0.000232475	0.0352303	-0.000198778	0.0518063	-0.000140435	0.557515	-9.71382e-05	0.125476	0.00118414	0.584865	-0.0465582	0.327613	-0.0300011	0.532271
648	5810289	KIAA0672	0.0402388	0.189558	0.0517899	0.0853363	0.0481712	0.238379	-0.00782273	0.852711	0.000193885	0.277736	-2.32419e-05	0.768771	-1.73636e-05	0.807331	-4.19846e-05	0.805423	-3.85966e-05	0.389253	0.000507781	0.740921	0.0446381	0.181855	-0.0578517	0.0951845
649	6370315	TREM1	0.0973685	0.490096	0.282697	0.0472528	0.226385	0.264864	0.448598	0.0223418	-0.000864532	0.293101	-1.25933e-05	0.972394	-0.000258357	0.444549	-0.000754679	0.339197	0.000136003	0.515853	-0.00114794	0.872663	0.0885995	0.572619	-0.0756519	0.633342
650	1010612	LAS1L	0.00558653	0.877145	0.0315303	0.386359	0.00588114	0.90886	0.0223419	0.656707	0.000241505	0.252032	0.000118282	0.203295	5.7359e-06	0.947416	0.000105725	0.600675	-0.000116376	0.0302314	-0.00278363	0.130288	0.0586088	0.14407	-0.00351805	0.931798
651	4280445	FOXH1	-0.0246328	0.327083	-0.0132821	0.588845	0.0244281	0.464226	0.0160292	0.642473	-0.000127066	0.385306	-3.7897e-05	0.558793	1.54949e-05	0.787137	4.63047e-05	0.740251	7.42861e-06	0.838842	0.000193189	0.877365	0.00720361	0.792798	-0.0336923	0.233324
652	3990307	OR6C6	0.0106044	0.731563	0.0366017	0.228872	-0.0757618	0.0737578	0.00975603	0.817914	6.59506e-05	0.712229	-2.86928e-05	0.718883	9.74086e-05	0.173619	5.89109e-05	0.732608	-3.22945e-05	0.473974	0.00121702	0.428729	-0.0139871	0.680546	0.037595	0.274689
653	4480220	SP5	-0.041849	0.209754	0.0132302	0.680522	-0.0230716	0.600569	-0.0872922	0.0531925	-0.000243111	0.205664	6.96851e-05	0.41725	-1.8667e-05	0.805735	-3.3582e-05	0.856399	1.51246e-06	0.974933	-0.00103725	0.525768	-0.0187297	0.605003	0.0476006	0.197728
654	3170450	MGC40178	-0.040162	0.213422	-0.0207792	0.509406	-0.0127996	0.765028	-0.044344	0.31698	-0.00024332	0.19515	1.11799e-05	0.893188	-1.09627e-05	0.880941	0.000366393	0.0411207	5.41426e-06	0.907871	0.000368181	0.81839	-0.0357872	0.309741	0.0464756	0.199155
655	3610082	OR13J1	0.0149603	0.606823	0.0423341	0.130836	0.0143346	0.708951	0.0354539	0.368076	6.97635e-06	0.966754	7.21278e-05	0.335573	-9.94043e-05	0.130634	-0.000199067	0.218357	-3.3369e-05	0.425338	0.00146355	0.304281	-0.0385189	0.222735	0.0176171	0.584245
656	7000286	OR52N1	-0.00707195	0.808573	-0.0161614	0.571037	0.0129314	0.744192	0.0823039	0.0385489	-2.06727e-05	0.902397	8.2969e-07	0.991189	-2.38274e-05	0.72615	0.000205417	0.206763	-3.75588e-06	0.929735	-0.00120131	0.406396	-0.00964246	0.762601	0.0195931	0.5465
657	5910484	SLC30A8	0.0342129	0.264075	0.0855037	0.00490252	0.0279321	0.509421	0.053135	0.20835	-1.03285e-05	0.953752	0.000101159	0.199569	-4.54633e-05	0.529827	-0.000108279	0.526231	-2.38613e-05	0.596973	-0.000360933	0.814874	-0.0088641	0.792687	0.01338	0.69832
658	1430392	SMG5	-0.0266599	0.611699	0.045365	0.391914	-0.000930023	0.990127	0.175869	0.0161755	9.5525e-05	0.755224	-5.08064e-05	0.707086	2.51783e-05	0.841869	-0.000380485	0.19513	-4.49628e-05	0.564401	0.00224277	0.401274	-0.0153567	0.792536	0.0420184	0.47985
659	4670671	C12orf61	0.106006	0.194185	0.415663	4.46199e-07	0.241301	0.0400384	0.366704	0.00121283	-0.000628995	0.185561	1.08737e-05	0.958814	-2.69331e-05	0.890881	0.000782617	0.0870583	-0.000158655	0.190262	0.00285557	0.490069	-0.117849	0.194461	-0.0444898	0.627635
660	460524	TRFP	0.0162174	0.79722	-0.0643515	0.311133	-0.0907533	0.315845	0.126115	0.149568	-3.98535e-05	0.913549	-0.000334036	0.0401783	0.000162483	0.2829	-0.000102289	0.772141	0.000256387	0.00611985	-0.000889459	0.780784	-0.00662055	0.924819	-0.0995383	0.159713
661	7380333	MFSD7	-0.0666271	0.106175	-0.0952575	0.0212643	-0.0138731	0.811162	-0.136349	0.0176179	0.000281564	0.242505	-8.06905e-05	0.447552	-0.000190286	0.0504233	-0.000615319	0.00747694	-4.53937e-05	0.456843	0.000514203	0.806052	0.00315111	0.945095	-0.035439	0.448076
662	3840670	CGNL1	0.0407202	0.215297	0.0202905	0.534291	0.017243	0.703478	-0.0455696	0.315454	0.000212865	0.265979	-6.85338e-05	0.417905	-6.05691e-05	0.435101	0.00024848	0.17493	3.13065e-07	0.994844	0.0015545	0.348488	0.0306876	0.396381	-0.00657734	0.859668
663	650112	ZNF677	0.0223675	0.457757	0.011073	0.71315	0.0650794	0.124444	0.0493588	0.237878	-0.000202434	0.248681	1.8458e-06	0.981042	-5.87108e-05	0.406686	0.00017475	0.29865	4.94649e-05	0.265614	0.000614612	0.686271	-0.0222599	0.504838	-0.0176638	0.601689
664	4250064	FLJ21736	-0.0124578	0.656763	-0.0136596	0.620373	0.000609021	0.987121	-0.0487578	0.20648	7.03288e-05	0.666629	4.68824e-05	0.516406	-3.48499e-05	0.591097	-0.000143546	0.357268	1.52367e-05	0.710032	-0.00228203	0.104052	0.01775	0.562958	-0.0177709	0.574178
665	5290736	FLJ10661	-0.0336008	0.368771	-0.0321764	0.386372	-0.0344179	0.507095	0.012076	0.814928	-5.37036e-05	0.804854	-5.3638e-05	0.577353	-7.29163e-05	0.409129	0.000107477	0.606332	-1.48912e-06	0.978438	-0.00124953	0.506838	-0.00142537	0.97241	0.0108808	0.796061
666	2710674	FSCN2	0.0287677	0.243005	0.00686362	0.777654	0.0354479	0.29095	-0.0323298	0.341814	0.000352168	0.0140666	-0.00010286	0.105475	1.67231e-05	0.768033	3.56991e-05	0.79472	-3.90534e-05	0.27801	-0.000553109	0.653815	-0.013492	0.61852	-0.0129933	0.638525
667	430703	MGC45438	0.0290664	0.259042	0.00969296	0.700746	0.0224889	0.514435	0.033761	0.3384	-4.44448e-05	0.766335	0.000114072	0.0853861	-4.15636e-05	0.488194	-4.19345e-05	0.769676	-1.46084e-05	0.698006	-0.000360415	0.779099	0.0039288	0.888726	-0.00329109	0.909512
668	3390463	KRTAP20-1	0.0113583	0.703739	0.0447995	0.122069	-0.0260032	0.510801	-0.0118942	0.770466	0.00026521	0.125268	-4.24802e-05	0.581224	6.9191e-05	0.305832	-0.000152235	0.35933	-7.06507e-05	0.101539	0.000294681	0.841572	0.0601671	0.0644158	-0.0448693	0.17756
669	730333	PDYN	6.59246e-07	0.999982	0.0485491	0.0962748	0.0256205	0.530165	0.0510738	0.207884	1.05049e-05	0.951186	-1.66639e-05	0.827248	-7.33744e-05	0.29467	0.000270724	0.10207	-1.93002e-05	0.657441	0.00119374	0.419583	-0.0262524	0.420062	0.044353	0.180508
670	1690240	LEP	-0.0428233	0.155693	0.00272822	0.927768	-0.0412249	0.328501	0.000614621	0.98828	-7.85037e-06	0.964365	-9.50841e-07	0.990245	9.53334e-05	0.177119	-0.000414707	0.0137281	-3.09242e-05	0.486467	-7.88695e-05	0.958668	0.0659393	0.0482398	-0.0827291	0.0146719
671	6900379	MGC70870	0.0448977	0.0918185	-0.00253979	0.921184	0.0270107	0.442625	0.0411191	0.254484	-0.000166	0.278984	5.3219e-05	0.437993	-4.82574e-05	0.423102	0.000486821	0.00101643	1.24177e-05	0.746062	-0.00148726	0.25447	-0.0492071	0.0890769	0.0459681	0.119097
672	4490445	SIGLEC5	-0.128225	0.0767112	-0.205864	0.00468952	-0.123932	0.2316	-0.0518933	0.604845	-0.000277188	0.510383	-6.19754e-05	0.739978	-0.000329199	0.0584976	-0.000367538	0.364667	-6.72988e-05	0.530621	-0.0039135	0.285606	0.00736958	0.927005	-0.0363763	0.654549
673	4830370	BAX	-0.116582	0.00661517	0.012584	0.766742	-0.0787418	0.184228	0.039166	0.506713	0.000192876	0.437749	-0.000273923	0.0133625	6.11816e-05	0.540297	2.00928e-05	0.933165	-4.97126e-05	0.428609	0.006752	0.00162358	-0.0438546	0.353687	-0.0575596	0.228984
674	1850053	FLJ36070	0.00517611	0.844661	0.0200238	0.436491	0.0216028	0.54389	-0.0314874	0.381475	2.95985e-05	0.846058	6.41251e-05	0.346022	-3.72835e-05	0.539945	-0.00017362	0.238096	8.27827e-05	0.0309765	0.000268396	0.837076	-0.0354371	0.219449	0.0240539	0.412525
675	6860070	RAB11FIP1	0.0576507	0.149873	-0.0132864	0.742278	-0.0636795	0.265508	-0.0119467	0.83028	-0.000256234	0.272774	-1.78173e-05	0.862658	-0.000181879	0.0597364	-0.000122361	0.584743	8.00731e-05	0.178604	0.000678429	0.739363	-0.00505664	0.909508	-0.0539445	0.23608
676	7650762	FXYD5	-0.0605297	0.334612	-0.0433061	0.491635	-0.130988	0.142276	-0.111969	0.197748	-0.000248968	0.495125	-0.00018667	0.248115	0.000242504	0.106299	0.00018709	0.593811	0.000206061	0.0265992	0.00445903	0.160291	-0.0018473	0.978826	0.0924629	0.190013
677	6580309	PROK1	-0.0215302	0.505514	0.024167	0.440495	-0.0511589	0.235299	0.0289345	0.510239	-0.000307419	0.0990607	9.58795e-05	0.249905	-5.51347e-05	0.453618	1.55181e-05	0.931301	-5.49546e-06	0.906356	1.94682e-05	0.990235	-0.0312756	0.374817	0.00982261	0.78415
678	6110114	MMP25	0.00983756	0.743807	0.0190899	0.517507	-0.0129289	0.746571	0.0570756	0.167133	-8.67147e-05	0.620724	-5.24716e-06	0.94608	8.65307e-05	0.214615	-4.16288e-05	0.803422	-3.20157e-05	0.466312	-0.000759391	0.613856	0.0221874	0.498588	0.0310359	0.361069
679	6900066	MBTPS2	0.0610566	0.0651855	0.0398763	0.218714	0.047704	0.286014	-0.0211986	0.63971	7.6771e-05	0.689096	-6.83367e-05	0.42267	-2.8688e-05	0.709881	0.000326794	0.0762801	-1.73285e-06	0.971434	0.000317776	0.847119	-0.00751661	0.835408	-0.0358748	0.333111
680	6060114	KIF4A	0.00576564	0.847314	-0.0326246	0.274226	0.0789035	0.0601222	0.0229271	0.579354	-8.44868e-05	0.627181	9.68939e-05	0.209326	-0.000117552	0.0963481	1.78986e-05	0.914763	2.847e-05	0.518765	0.00162591	0.280673	-0.0487662	0.140732	0.0231822	0.489701
681	5570333	KCNJ3	0.00798706	0.766862	0.0223568	0.392847	-0.0421857	0.237093	-0.0281049	0.445097	0.00016669	0.285851	-7.70034e-05	0.267577	4.1311e-05	0.498745	-6.44151e-05	0.66713	-4.81311e-05	0.216719	0.000978801	0.462327	0.0201652	0.492005	-0.0340851	0.256813
682	4200767	MGC23244	-0.115964	0.00776299	-0.0515424	0.240672	-0.0714682	0.250745	-0.125538	0.0384181	0.000247356	0.330404	5.34085e-05	0.633792	-0.000221949	0.0341403	-0.000281376	0.247991	6.04128e-05	0.350615	-0.00392584	0.0765694	0.109336	0.0239065	-0.0814	0.0994209
683	7160180	APCS	0.00145963	0.957607	0.00940141	0.731389	-0.0538297	0.159981	-0.0353167	0.354254	1.714e-05	0.914745	0.000102603	0.147244	-6.47726e-05	0.312494	-0.000152037	0.320766	-2.00233e-05	0.620479	0.00186686	0.178025	-0.0323497	0.287047	-0.000971326	0.974929
684	2810228	PAH	-0.0266967	0.311701	0.00628728	0.807035	-0.00625401	0.858232	0.0491684	0.173909	2.78392e-05	0.855996	2.41387e-06	0.971694	-0.000111593	0.0643018	0.000170564	0.24481	-1.12496e-05	0.769133	-0.000719211	0.5834	0.0214625	0.455438	-0.0312547	0.291094
685	670719	KCNA1	-0.0223768	0.464015	-0.00538416	0.857112	0.041832	0.302992	0.0167022	0.690228	-0.000294714	0.0973989	-1.25767e-05	0.873125	0.00010515	0.13647	0.00034765	0.0406149	-3.56898e-05	0.423252	0.000850059	0.577271	-0.0640623	0.0542586	0.0869374	0.0115654
686	60273	PDZRN4	-0.0322922	0.326787	0.0379394	0.240327	0.00584102	0.894499	0.0299464	0.509715	-8.19111e-06	0.965981	-1.01076e-05	0.905304	-7.7751e-05	0.298781	-6.24108e-05	0.733177	1.82554e-05	0.702953	-0.00226177	0.168821	0.0614634	0.0884549	-0.0776446	0.0361673
687	5690632	LIMK1	-0.0678943	0.0588719	-0.00816651	0.82171	0.0360389	0.483054	0.0555383	0.266749	-0.000148814	0.477716	-5.71439e-05	0.53677	-8.64805e-05	0.317099	-0.000516559	0.0101673	0.000210692	7.93917e-05	0.000772059	0.672733	-0.0528611	0.185666	-0.0165866	0.683632
688	4070066	CREB3L4	0.0351303	0.213946	0.0277607	0.309471	-0.0334356	0.371052	0.0320895	0.402734	-0.000318364	0.0511656	1.04401e-05	0.885873	2.22792e-05	0.731518	0.000331811	0.0347158	6.10316e-05	0.136427	-0.00157771	0.256962	-0.0210643	0.492122	0.0348232	0.268043
689	2100201	SS18L1	0.171538	0.000209294	0.0501191	0.280177	0.0751838	0.251188	0.131024	0.0409262	-0.000225396	0.402602	0.000110508	0.353241	0.000206241	0.0637675	-0.000484734	0.0609122	9.16067e-05	0.181973	-0.00257096	0.272966	-0.0083277	0.870935	0.000546704	0.991664
690	6040411	APEG1	-0.0324038	0.61821	0.0353832	0.588654	0.0127054	0.89122	0.00327993	0.971	0.000549807	0.146353	0.000243131	0.146405	-0.000232563	0.137197	0.000262543	0.470444	-0.000300985	0.00181444	-0.0119048	0.000306218	0.177262	0.0140802	-0.00217097	0.976385
691	2510754	ABHD5	-0.0122946	0.849982	-0.139166	0.0341074	-0.239467	0.0102733	-0.110771	0.221035	0.000280469	0.45963	3.33772e-05	0.841855	-0.000394557	0.0119497	-0.00101512	0.00527717	-1.14717e-05	0.905494	-0.00822578	0.0128574	0.104811	0.146999	-0.134538	0.0679357
692	4730288	ATP1B1	-0.158225	0.0819968	0.0434011	0.636448	-0.097135	0.456347	0.172211	0.174067	-1.27896e-05	0.980774	-0.000467915	0.0458183	-2.02165e-05	0.926266	0.000397317	0.434895	-0.000206161	0.127062	0.00435479	0.346619	0.111353	0.271072	0.00290571	0.977461
693	7400653	GCLC	-0.0127151	0.760647	-0.0716193	0.0804838	-0.0178916	0.747232	0.0321075	0.575822	-0.000471075	0.0528003	-0.000135917	0.2066	0.000343342	0.000384748	-3.54541e-05	0.878483	0.000180335	0.00310168	0.000380129	0.855754	-0.0665406	0.143642	0.0339737	0.471947
694	4010392	PHOX2A	0.0149744	0.59744	0.0108941	0.694835	0.00805208	0.831777	0.0227413	0.558294	-5.6435e-05	0.731962	6.25868e-06	0.931706	7.72572e-05	0.241167	-0.000163632	0.299317	-3.23221e-05	0.435361	0.000613335	0.66474	0.00956258	0.757034	-0.00168786	0.957814
695	5550435	TBC1D4	-0.144281	0.012121	-0.0237673	0.682153	-0.0968312	0.240436	-0.223956	0.00510908	0.000630003	0.0601995	0.00059297	6.19933e-05	-0.000550075	7.31317e-05	0.000307511	0.339448	-0.000383803	7.0725e-06	-0.00736593	0.0117065	0.0801023	0.210222	0.0368757	0.570743
696	5390358	TRAK1	-0.1254	0.00220615	-0.101579	0.0139343	-0.0998664	0.0872242	-0.13626	0.0168408	0.000189648	0.427569	-0.000147594	0.161374	5.82095e-05	0.555652	0.000548016	0.0167351	2.81957e-05	0.643412	0.000740912	0.722507	0.0349477	0.442494	0.0710558	0.127352
697	2760608	RAPH1	0.0126078	0.640726	0.0467343	0.0724093	0.00942332	0.791681	-0.0254352	0.486518	0.00021051	0.175905	-1.69962e-05	0.806938	-8.70092e-05	0.157097	0.000121758	0.41774	-1.4624e-05	0.70754	0.000930422	0.482101	0.0371933	0.20455	-0.0375665	0.209309
698	2490670	FRMPD2	-0.0714674	0.0110741	-0.0170702	0.539764	-0.0529256	0.17436	-0.0616608	0.110968	-0.000341986	0.0358259	2.4868e-05	0.731816	-8.16572e-06	0.900912	0.000191288	0.223172	1.95523e-05	0.635029	-0.00254993	0.0696221	0.0150395	0.627678	-0.038449	0.220269
699	620059	INPP5D	0.205471	7.08898e-09	0.0912877	0.010912	0.14308	0.00496916	0.176734	0.000349143	5.26831e-05	0.799206	4.05595e-05	0.657024	-4.95252e-05	0.563363	-0.000396889	0.0457654	0.000230136	1.29054e-05	0.000995481	0.58143	0.0283777	0.472093	0.0754738	0.0607709
700	6620546	MSN	-0.0774075	0.13844	-0.0371947	0.478417	-0.00377231	0.959739	0.039745	0.582113	-2.20586e-05	0.942078	-1.3953e-05	0.91741	-0.000138963	0.270937	-0.000645892	0.0272876	0.000122896	0.112658	0.00215019	0.415768	0.0223365	0.700014	0.0512449	0.382974
701	6020528	GABBR1	-0.0151791	0.611364	0.00768828	0.794767	0.0168776	0.682923	0.0383672	0.350606	-0.000236997	0.171013	5.81344e-05	0.450514	-1.18732e-05	0.864464	0.000136182	0.413979	-3.01212e-05	0.491056	0.00317076	0.0336947	-0.0675395	0.0402154	0.0224402	0.500788
702	6480204	ESCO1	0.010003	0.827706	-0.0357359	0.437029	-0.0757748	0.236444	0.0224158	0.725021	9.80186e-05	0.714658	-0.000237138	0.0449856	0.000310353	0.00467331	-0.000144578	0.572815	0.000139255	0.0408186	-0.000334688	0.886014	0.0612026	0.228133	0.0279201	0.594403
703	7380528	PHF6	-0.0331427	0.28837	-0.0395163	0.192447	0.0126708	0.759293	-0.013715	0.747383	-0.000189162	0.295749	0.000180767	0.0245802	-5.06638e-05	0.478317	-0.000183182	0.291083	2.21465e-05	0.624816	-0.000165218	0.914811	-0.0597793	0.0782409	0.0125549	0.718799
704	5310369	GZMK	0.172345	0.147283	0.117186	0.329205	0.0113717	0.947038	-0.00688928	0.966796	0.000539163	0.436578	-0.000204136	0.505854	0.000358462	0.207965	-0.000330531	0.619481	-4.83354e-05	0.784089	0.00994207	0.0995326	0.101917	0.441397	0.158957	0.234029
705	4290315	TSCOT	-0.337637	0.000490054	-0.507965	1.94293e-07	-0.203447	0.142417	-0.362098	0.00722861	0.00100308	0.0755839	-0.000207836	0.405563	-0.00051661	0.0249003	-0.000487121	0.368329	-0.000147574	0.303841	-0.010031	0.0412343	0.0539515	0.616553	-0.055228	0.611536
706	1690161	CDGAP	0.108067	0.0526498	0.0899807	0.108134	0.0886448	0.261036	0.215276	0.00543268	-0.000303358	0.350755	-0.000277253	0.0533533	9.23884e-05	0.489672	0.000316678	0.309432	4.46444e-05	0.589551	-0.00502547	0.0760936	0.0391752	0.52629	-0.106719	0.0917614
707	4050601	SYCE1	0.0289171	0.373814	0.0029399	0.926094	-0.015094	0.728259	0.0283482	0.52393	-9.84197e-06	0.958354	6.2337e-05	0.457034	2.28923e-05	0.757613	-0.000200216	0.268376	6.82237e-05	0.148051	-9.74592e-05	0.951765	0.0102626	0.77252	0.0030466	0.933099
708	5910390	BLM	0.0770752	0.0794262	0.0446628	0.311544	0.0512588	0.410289	0.0459069	0.45164	-0.000127394	0.618818	-0.000114649	0.31063	-5.85217e-06	0.955739	7.09995e-05	0.772478	0.000125765	0.0537529	0.000112519	0.959777	0.0045405	0.925748	-0.0582484	0.242064
709	6660598	GPR4	0.0055399	0.853952	-0.0209438	0.473375	0.0203722	0.609283	-0.0451092	0.271156	-6.25845e-05	0.719555	4.94844e-05	0.523072	6.19165e-05	0.371111	1.69186e-05	0.919431	4.1295e-05	0.344868	0.000870361	0.558792	-0.0309369	0.343978	0.0142324	0.671976
710	2060731	TMEM80	-0.0478485	0.087598	0.00592909	0.825855	0.00692443	0.851467	0.0206566	0.585278	-0.000165601	0.304432	0.000145339	0.0437071	-3.71816e-05	0.56181	7.08729e-05	0.649098	-1.92403e-05	0.634621	0.00109142	0.426383	-0.0259012	0.393601	-0.0105967	0.732695
711	4220368	TMEM80	-0.116381	0.0438296	-0.0536685	0.356927	0.040364	0.626378	-0.148419	0.064564	0.000174941	0.60307	8.58674e-05	0.563839	-0.000201624	0.145958	0.000303478	0.347584	-0.000147445	0.0853668	-0.00270344	0.356411	0.011187	0.861705	-0.0224483	0.730039
712	2000544	HOXC12	0.0102591	0.762068	0.00496536	0.879163	0.0773746	0.083885	-0.0261501	0.568966	0.000289189	0.138257	-4.58024e-05	0.599844	-8.92118e-05	0.244464	-0.000160604	0.39421	-2.49193e-05	0.609521	2.80123e-05	0.986541	0.00227325	0.950773	-0.00856958	0.819364
713	650451	RPE	0.0367797	0.598947	-0.0858524	0.220837	0.0276831	0.781316	0.0529553	0.583471	-1.84184e-05	0.963835	5.33256e-05	0.767158	-0.000259481	0.124131	0.00069643	0.0752868	3.07519e-05	0.766655	-0.00328504	0.35257	-0.0394239	0.611122	0.0566789	0.470726
714	1430598	RPE	-0.0493049	0.0663886	-0.0518593	0.0505117	0.0100309	0.784107	-0.00863531	0.815351	0.000193245	0.216036	-4.85221e-05	0.482956	-4.74453e-05	0.45031	6.31587e-05	0.672851	-3.61402e-05	0.35925	0.000725082	0.590585	0.0406956	0.167321	-0.0553228	0.0676449
715	4210746	CEP250	0.0998613	0.00509976	0.107694	0.00270314	0.0482027	0.341541	0.112214	0.0236339	4.83324e-05	0.816251	0.00010762	0.240751	5.21798e-05	0.542934	-0.000366817	0.0656762	9.25421e-05	0.0806621	0.0016951	0.350237	-0.0595793	0.132268	0.0223771	0.580873
716	2120598	MYBBP1A	0.0167682	0.682638	0.0917178	0.0243955	0.0189746	0.737475	0.195014	0.000582309	9.22493e-05	0.699346	7.18202e-05	0.496478	-0.00017877	0.0640004	0.000209028	0.360516	-7.86686e-05	0.192859	-0.00115953	0.57506	-0.012271	0.78598	-0.00704714	0.879185
717	6480440	JPH4	-0.0155339	0.598182	0.0160072	0.572753	-0.0555617	0.154808	0.0361426	0.363935	0.000170507	0.315092	3.4274e-05	0.650958	4.12725e-05	0.544756	-0.000228346	0.163605	-3.89615e-05	0.36233	0.00316681	0.0285331	-0.0280158	0.38036	0.0077877	0.811612
718	940687	RASSF2	0.0153918	0.572625	0.0431118	0.107102	0.105874	0.00353348	-0.00536318	0.886351	-0.000163057	0.305162	-0.000138162	0.0495416	5.40571e-05	0.389196	0.000447058	0.00318591	-1.58525e-06	0.968207	0.0019407	0.15486	-0.0301491	0.311184	0.00810615	0.792476
719	7610053	TSNARE1	0.0515362	0.0692383	0.0681314	0.0152557	0.0690865	0.0764014	0.0519208	0.184293	7.29519e-05	0.6583	-8.78935e-06	0.904233	3.61448e-05	0.586745	9.73492e-05	0.538054	-4.6157e-06	0.911827	0.00243372	0.0876502	-0.0423735	0.174459	-0.00396579	0.901164
720	5700369	TUBA3	-0.0997772	0.222824	-0.116936	0.157392	-0.163964	0.163197	-0.251755	0.0271809	7.38819e-05	0.877048	0.000151656	0.471682	-0.00045728	0.020559	7.08781e-05	0.877084	-2.59637e-06	0.982969	0.00309692	0.456757	0.136175	0.134616	0.0855334	0.356009
721	7200673	PSME4	0.157251	0.0195488	0.16913	0.012797	0.231313	0.0168107	0.209159	0.0255329	-0.000850905	0.0300831	4.02705e-05	0.816652	0.000386386	0.0165547	-0.000147717	0.695034	0.000158951	0.111593	-0.00160618	0.638392	0.022727	0.761676	0.0792238	0.295146
722	3400494	PTPDC1	-0.017021	0.558582	0.00342684	0.904779	-0.0199324	0.610478	-0.0229791	0.567654	0.000266087	0.117168	0.000161315	0.0316188	-0.000171992	0.0097015	-1.67935e-05	0.917335	-3.54945e-05	0.402756	-0.00206457	0.156528	-0.0135043	0.672325	-0.0116581	0.722566
723	6040338	PTPDC1	-0.0373064	0.171272	-0.0387901	0.139982	-0.0222265	0.537215	0.0182126	0.622054	-4.04156e-05	0.79685	-0.000108161	0.123687	-1.19099e-05	0.846894	0.000201103	0.184935	-3.64168e-05	0.353653	-0.00162577	0.223754	0.00391778	0.894815	0.0110197	0.71518
724	6580524	FLJ20643	0.0537842	0.199357	-0.0193109	0.645915	-0.0131118	0.824227	0.021284	0.715103	-4.39708e-05	0.857368	6.32361e-05	0.557946	-7.75169e-05	0.43502	0.000302343	0.196065	-1.48112e-05	0.811322	0.0028807	0.175898	-0.0108589	0.815262	0.0169234	0.721637
725	2000577	KRTAP10-8	-0.0189255	0.555689	0.0048637	0.877172	-0.0324563	0.447047	0.0481842	0.274536	3.88159e-05	0.835578	0.000143475	0.0831053	-1.76424e-05	0.812171	-0.000362727	0.0420811	4.30312e-06	0.926841	0.00026137	0.870666	0.0645091	0.0652752	-0.0602702	0.0963792
726	6590468	VAMP1	-0.0029458	0.940185	0.0578767	0.141722	0.143478	0.00950001	0.0477529	0.380637	0.000109157	0.633349	7.20443e-05	0.47565	-2.24753e-05	0.811399	3.12198e-05	0.88678	-6.53357e-05	0.26201	0.000843983	0.672145	-0.0426021	0.327159	0.0509726	0.253331
727	3930408	ALLC	0.0227506	0.407921	-0.00446891	0.868225	-0.0327144	0.37059	0.0707533	0.0610573	-1.92311e-05	0.904416	-1.45699e-05	0.837141	3.25601e-05	0.607076	-6.37029e-05	0.676639	5.20441e-05	0.194053	0.000274929	0.841361	-0.0200825	0.502872	0.0253248	0.414278
728	780408	REL	0.288063	0.000137035	0.238788	0.00160209	0.153808	0.145324	0.258519	0.013651	-0.000642127	0.145091	-3.54589e-05	0.855261	0.000479628	0.00789771	0.00030475	0.469697	0.000100055	0.371575	-0.00289294	0.451212	0.0327866	0.694776	0.0473967	0.582258
729	730497	PUS3	0.00465239	0.909502	-0.0804429	0.0493337	-0.128387	0.0269826	0.0229761	0.68386	8.22577e-05	0.729165	-0.000139435	0.185721	0.000103443	0.294051	4.92278e-05	0.829816	1.95414e-05	0.747039	0.00164828	0.424728	-0.0512173	0.258255	-0.0139394	0.761697
730	3400286	C6orf60	-0.00188498	0.96363	0.0595079	0.14832	-0.0825632	0.156244	-0.139884	0.013844	0.000322553	0.178387	0.000489477	4.19454e-06	-0.000358309	0.000310638	0.000210803	0.361886	-0.000187434	0.00215406	-0.00562366	0.00685547	0.0244451	0.592346	0.00816183	0.860275
731	5490348	THBD	-0.208879	0.169003	-0.0988636	0.518721	0.18077	0.407942	0.103011	0.625388	0.000497222	0.573766	-0.000317443	0.417981	0.000180714	0.619037	-0.000440174	0.604536	0.000106984	0.634655	-0.00568498	0.460282	0.293597	0.0823896	-0.0791461	0.641997
732	610471	CRR9	-0.025516	0.442469	-0.0462255	0.167831	0.0464872	0.32862	0.0306403	0.507197	-0.000108387	0.575713	0.000121909	0.153918	-0.000111911	0.162647	-0.000295033	0.112527	2.14225e-06	0.965389	0.00111927	0.507423	-0.0775707	0.0356375	0.0599009	0.111281
733	240221	C21orf13	0.0336965	0.286539	0.0293743	0.344344	0.00234638	0.956261	0.118694	0.00637985	-0.000209136	0.255128	-2.23136e-05	0.784334	1.79894e-05	0.803959	0.000610104	0.000527823	-0.000115565	0.0121232	0.00325156	0.0392142	-0.0278879	0.421425	0.0536973	0.129456
734	2650048	LAMB3	0.0506168	0.057806	-0.0180372	0.482191	0.0637042	0.0705091	-0.0300326	0.40482	-4.598e-05	0.764658	-3.9128e-05	0.568609	0.000188903	0.00198102	-0.000221452	0.135516	5.76679e-05	0.134863	-0.00192708	0.140353	0.000493713	0.986377	0.0714253	0.0156521
735	6550097	LAMB3	0.293148	0.0414591	0.699292	1.39035e-06	0.317879	0.123684	0.63298	0.00151316	-0.001276	0.127177	-4.43798e-05	0.904765	0.000324315	0.346535	-2.15079e-05	0.978677	-9.66139e-05	0.650305	0.000615512	0.932667	0.0860844	0.590374	-0.0640412	0.691238
736	2140685	MGC39606	-0.00962976	0.775074	0.0108041	0.739039	0.00772809	0.862119	-0.0275898	0.544823	5.21609e-05	0.788041	2.23533e-05	0.796589	3.66401e-05	0.634023	9.27271e-05	0.620755	-4.14064e-05	0.394994	0.00219611	0.183459	-0.0212692	0.560549	0.0398422	0.285808
737	380736	C4orf9	0.0237635	0.451598	0.066096	0.0333997	0.0536392	0.208867	0.0708288	0.102384	0.000170386	0.353172	0.000134207	0.09873	7.85693e-05	0.287303	-0.000278641	0.112761	8.89199e-06	0.847643	-0.000810907	0.608092	0.0288905	0.402859	-0.0220926	0.534721
738	2750682	OR2A25	-0.0147252	0.55742	-0.0221024	0.36422	0.0155033	0.640875	-0.0139592	0.683755	-3.0122e-06	0.983475	-5.20605e-05	0.421117	2.96604e-05	0.601778	-0.00013986	0.316242	7.48721e-05	0.0390276	0.00219472	0.0766387	-0.00250723	0.926932	-0.0230279	0.41051
739	1190040	CIZ1	-0.0475605	0.111888	0.0479222	0.105794	0.000467883	0.990838	-0.00241041	0.953462	0.000118694	0.496062	2.49604e-05	0.746018	-7.96327e-05	0.256499	-4.45662e-05	0.789022	-3.25153e-05	0.459811	0.00137206	0.362868	-0.0582297	0.0763049	-0.0175369	0.605327
740	2690450	OR2G3	0.0270523	0.304623	0.0572428	0.0259261	0.0916721	0.00909487	0.0459476	0.201927	-7.47311e-05	0.624876	0.000101876	0.13328	-9.31388e-05	0.126141	0.000129626	0.376344	-6.69961e-05	0.0809541	0.000324455	0.804242	-0.0693586	0.0156567	0.0298858	0.31127
741	840386	UQCRC2	-0.0622283	0.23352	-0.114857	0.0281839	-0.123065	0.0918014	-0.116776	0.107137	-0.000181148	0.552235	-0.000124024	0.356168	0.000108	0.387434	0.000100186	0.731054	0.000142582	0.0656214	-0.00100282	0.705773	0.0405671	0.482556	-0.0600589	0.313874
742	3850370	PNMA2	0.0997444	0.00221577	0.0342396	0.281787	0.0671821	0.120904	0.00242365	0.956819	-0.00025128	0.185144	3.70695e-05	0.659362	6.44259e-05	0.382869	-4.85707e-05	0.788682	2.0721e-05	0.660898	-0.00245628	0.129201	0.0511454	0.150881	0.0153001	0.675301
743	2570477	AQP6	0.0278883	0.249048	0.0178693	0.446468	0.0546568	0.0919544	0.0581532	0.0765225	-0.000230891	0.0979264	5.7164e-05	0.358398	-0.000140825	0.011978	0.000140383	0.29736	2.25531e-05	0.521466	-0.000170116	0.886604	-0.0131118	0.618675	-0.0265286	0.323578
744	840309	YIF1B	-0.0191068	0.754867	-0.033683	0.58542	0.0324473	0.710445	-0.19542	0.0220604	-0.000108326	0.76191	2.64883e-05	0.86649	-0.000231206	0.114536	-7.56921e-05	0.824814	1.21204e-05	0.893935	0.00299448	0.33709	-0.0353729	0.603256	-0.054727	0.430899
745	7400274	NEIL3	0.0839682	0.00248431	0.013291	0.618629	0.045196	0.217417	0.0570384	0.128187	-0.000181049	0.257395	4.72963e-05	0.50749	-2.49576e-05	0.695891	-0.000149041	0.334102	7.64606e-05	0.0571839	0.000426536	0.753922	-0.0326643	0.27715	0.00758553	0.805248
746	2350639	MOAP1	-0.133915	0.00542112	0.0416601	0.39011	-0.0185771	0.788217	0.0510266	0.44419	-0.000464244	0.0973451	0.000287837	0.0203382	4.6995e-05	0.686273	5.6123e-05	0.835236	5.87799e-05	0.410733	-0.00169318	0.487332	-0.0415407	0.437474	0.052865	0.329109
747	1170128	C3orf23	-0.0165788	0.746973	-0.120307	0.0192545	-0.100207	0.169718	-0.122909	0.0827126	4.17607e-05	0.888652	-0.000169387	0.200336	-0.000104815	0.397924	0.000206821	0.472093	5.38457e-05	0.479165	2.11814e-05	0.993482	-0.0134271	0.813415	-0.0640539	0.267135
748	1820092	C3orf23	-0.0226886	0.45628	0.0166665	0.580292	0.0644355	0.127814	0.0105077	0.801464	-0.000253382	0.150801	0.000182318	0.0200953	-0.00011178	0.120604	0.000175838	0.301174	6.47704e-06	0.884944	0.000378492	0.803866	-0.00542163	0.871579	-0.00658055	0.84667
749	7320102	LOC158830	0.252548	0.000164553	0.349131	2.43233e-07	0.247993	0.00995887	0.295722	0.00150448	-0.000411984	0.29142	-1.91642e-05	0.911594	0.000330142	0.0408923	0.000369999	0.32406	-4.85655e-05	0.625619	0.00441543	0.194408	0.00503709	0.946107	0.0378188	0.617118
750	3130437	RPS14	-0.00640221	0.907774	0.106463	0.0559899	0.192847	0.0144084	0.0200843	0.793773	-0.000250701	0.436582	0.000270349	0.0571917	-8.73288e-05	0.512912	2.92577e-05	0.924589	-0.000159589	0.0520963	-0.00010239	0.970952	-0.0220317	0.719579	0.0399032	0.52515
751	1780537	NRGN	-0.192297	0.165623	-0.126612	0.365448	-0.279919	0.160481	-0.597404	0.00192736	-0.00127722	0.113685	-0.000278372	0.436196	1.18297e-05	0.971713	0.000960227	0.216344	0.00023341	0.256806	0.0121101	0.0850609	-0.149858	0.331337	0.106058	0.496629
752	7570100	C11orf2	0.0107426	0.773314	0.0648936	0.0820741	0.0285702	0.589848	0.0688545	0.180601	0.000109953	0.611565	0.000136613	0.154707	-9.24304e-05	0.304634	-0.000135537	0.516188	-0.000111694	0.0431846	0.000839813	0.655518	-0.0396835	0.336587	-0.0126508	0.76276
753	7400465	TTN	-0.0361873	0.256046	-0.0156239	0.614053	0.0138324	0.743236	-0.0518899	0.232358	-7.06396e-05	0.702132	-3.37548e-06	0.967179	6.12633e-05	0.404835	-0.00022256	0.208744	1.77094e-05	0.702468	0.0014884	0.346058	-0.0314296	0.36386	0.0205823	0.563794
754	1050180	C20orf20	0.0448504	0.184527	-0.026124	0.441963	0.09243	0.0555812	0.125393	0.0073793	0.000170328	0.386231	-5.13029e-05	0.555307	-4.49478e-05	0.582294	-1.85687e-05	0.921828	2.40713e-05	0.631428	-0.000805948	0.637842	-0.0831836	0.0265416	0.0440977	0.247477
755	1990017	FLJ23861	-0.0491602	0.166054	-0.0386268	0.271436	-0.0554665	0.253784	-0.0258214	0.598999	0.000347622	0.0928149	-3.64427e-05	0.690498	-0.000113237	0.166837	0.000173395	0.380401	-0.00010554	0.0422734	-0.000586951	0.741826	0.0523281	0.180802	-0.00731642	0.854583
756	6590477	PARK2	0.00602954	0.821847	0.0916971	0.000419547	0.0522226	0.140825	0.0472461	0.196464	-0.000501981	0.00121819	0.000155552	0.024273	-1.01286e-05	0.867211	0.000364099	0.0144651	-8.74094e-06	0.821287	0.000562931	0.670414	-0.012541	0.667321	0.0335941	0.260503
757	1710438	MPZL1	-0.105459	0.151156	-0.193819	0.00836193	-0.151032	0.146717	-0.209168	0.0393097	0.000593418	0.164214	3.05605e-05	0.871822	-0.000328738	0.060345	-0.000646412	0.115591	-6.72727e-05	0.535274	-0.0030134	0.415944	0.0117882	0.884855	-0.0405928	0.62174
758	3180619	LY75	0.0324944	0.309347	0.0580146	0.0634613	0.025772	0.543675	-0.0228243	0.60401	0.000152242	0.413953	-1.66387e-05	0.840136	-6.5253e-05	0.366792	9.80569e-05	0.580921	-2.41025e-05	0.603028	-0.00139168	0.381798	-0.0291557	0.404064	0.0283328	0.430408
759	4280661	SEL1L	0.0108136	0.762294	-0.0486965	0.174345	-0.0417106	0.40955	0.00639543	0.897235	0.000233552	0.261694	-7.50811e-05	0.414335	0.000103966	0.22638	4.24108e-05	0.831927	-6.55811e-05	0.216193	-0.00137005	0.449594	0.0365071	0.356536	-0.0119683	0.767295
760	7200066	NLGN3	0.00448967	0.880866	0.0831133	0.00511285	0.0356508	0.388267	0.0706988	0.086505	-0.000145254	0.403975	5.13672e-05	0.505226	4.20377e-05	0.553076	8.09501e-05	0.627995	-8.2767e-05	0.0607054	-0.00154361	0.305436	0.00406171	0.901884	-0.0283844	0.400351
761	4070491	TOMM70A	-0.0544953	0.144453	-0.0306019	0.416645	-0.0198933	0.709972	-0.0392467	0.449679	4.64996e-06	0.982955	-8.53052e-05	0.37461	0.00020927	0.0203627	0.00044278	0.0341257	2.48295e-05	0.654614	0.000620703	0.74362	-0.0312143	0.451867	0.0174866	0.679363
762	5270685	INSRR	-0.00640987	0.815387	0.0141589	0.59598	0.0296149	0.415627	-0.00061473	0.98695	1.50506e-05	0.924767	-1.68574e-05	0.811822	-8.20521e-05	0.186439	-1.10775e-05	0.942138	-4.81929e-05	0.224899	-0.00204282	0.132823	0.0374214	0.211317	-0.0272102	0.375045
763	3800735	TRIM3	-0.0119115	0.701666	-0.0250805	0.406656	-0.0553481	0.17909	-0.00411833	0.922867	-1.81494e-05	0.919868	2.91693e-05	0.716049	-2.33812e-05	0.739593	0.000219024	0.205161	6.0551e-05	0.178069	0.000966788	0.529648	-0.0430926	0.203648	-0.0258972	0.45568
764	4150520	TRIM3	0.138501	0.000582801	0.0672748	0.0935209	0.0716298	0.204499	0.104555	0.0595268	8.32164e-05	0.721898	2.41466e-05	0.815701	0.000110242	0.252741	-0.00048684	0.0304765	8.15163e-05	0.170891	0.00158072	0.436063	-0.0396969	0.371801	0.0158119	0.727151
765	3610563	FGF20	0.0389658	0.238204	0.0281379	0.394331	0.0198352	0.670854	0.064527	0.157911	-1.29509e-05	0.946176	0.000130536	0.125717	-2.41061e-05	0.75724	-9.22798e-05	0.617237	2.08646e-05	0.668251	-7.23916e-05	0.965285	-0.00811084	0.82467	-0.0563682	0.126879
766	4570270	MGAT5B	-0.0356992	0.191309	0.0516197	0.0530203	0.00514785	0.887087	0.04893	0.192666	2.21726e-06	0.988882	1.71257e-06	0.980617	-2.65379e-05	0.667617	-8.91656e-05	0.557028	-3.11399e-05	0.431521	-0.00219543	0.10598	0.0106603	0.720956	0.0259146	0.397995
767	4900129	GALK2	0.0156273	0.754542	-0.0765819	0.12571	0.00444489	0.950085	-0.134388	0.0512161	0.000167574	0.563585	-5.47143e-05	0.670709	-3.91981e-05	0.744887	0.000355519	0.203766	3.0771e-05	0.67755	0.000314827	0.900675	-0.0249463	0.652206	0.0823168	0.142507
768	1400088	RNF19	0.16985	0.000996974	0.125271	0.0158968	0.111292	0.13201	0.0810984	0.25768	-0.000435773	0.146629	1.76316e-05	0.894701	0.000293471	0.0168981	-5.60855e-05	0.84595	0.000223581	0.00341607	0.00303926	0.244535	0.0267382	0.641253	0.137956	0.016945
769	4570088	RNF19	0.0181059	0.616471	0.0078525	0.828209	0.12179	0.0177042	-0.00317071	0.949331	-5.23235e-05	0.803147	0.000122532	0.188224	-0.000150691	0.0826548	0.000168843	0.403847	-9.80445e-05	0.0668224	-0.00132466	0.467833	-0.0171263	0.668925	0.0631298	0.119619
770	6130181	KRTAP19-5	0.0177918	0.559621	-0.000311902	0.991632	-0.00810262	0.841794	-0.0504903	0.227258	6.3354e-05	0.720623	-6.31955e-05	0.421714	6.48466e-05	0.348553	0.000159053	0.348284	1.96983e-05	0.655758	0.0013871	0.35918	0.0410595	0.217645	-0.0507982	0.136401
771	2260370	CREB3	-0.0220287	0.489405	0.00396136	0.899482	-0.000806146	0.985151	-0.0023213	0.957624	0.000400026	0.030529	-1.99945e-05	0.807347	-9.18231e-05	0.22089	-0.000342676	0.0535331	-3.73178e-05	0.425109	-0.00143725	0.367422	0.0942665	0.00686876	-0.0325466	0.363805
772	5690315	ABI3BP	0.0178828	0.551721	-0.0106626	0.715037	-0.0076165	0.850587	0.0222383	0.585757	0.000173116	0.317876	-8.55165e-05	0.268498	-5.30582e-06	0.939479	1.09471e-06	0.99478	-5.28415e-05	0.227266	0.00160022	0.280855	-0.0156153	0.633452	-0.0229519	0.491967
773	3460097	SRI	-0.130256	0.0618436	-0.0731647	0.298055	-0.175624	0.0787629	-0.137419	0.156158	0.000259395	0.523211	-0.000262589	0.143618	0.000110615	0.510751	-1.66813e-05	0.965915	4.13636e-05	0.689719	0.000993641	0.77903	0.00522422	0.946256	-0.114024	0.147965
774	7200168	SRI	-0.0559448	0.246759	-0.111404	0.0216334	-0.0102544	0.880954	-0.083915	0.210202	-0.000126624	0.652582	1.33421e-06	0.991433	-6.4398e-05	0.579695	2.20198e-05	0.935005	3.92962e-05	0.583647	0.00619838	0.0114453	0.0337966	0.527834	-0.0453833	0.406924
775	50678	RARRES1	-0.13085	0.126903	-0.0971152	0.260895	0.0126772	0.917662	-0.0375344	0.752685	-0.00016538	0.740556	-4.97718e-05	0.821562	1.10241e-05	0.957403	1.2018e-05	0.980008	9.45425e-06	0.940802	-0.00672375	0.122476	0.0378326	0.69119	-0.00851699	0.929942
776	2810189	RARRES1	-0.00933423	0.795143	-0.01716	0.620223	-0.0298365	0.529762	0.0527004	0.278843	-0.000116517	0.573477	-3.6269e-05	0.695228	0.000112369	0.16882	5.86755e-06	0.976591	3.60259e-05	0.487061	0.00082729	0.638614	0.0131132	0.736892	0.0189056	0.634928
777	1450414	PEX19	-0.0684863	0.068875	-0.026353	0.486378	-0.065752	0.220357	-0.0719271	0.168305	0.00060792	0.0055401	-6.71811e-05	0.487949	3.85027e-06	0.96618	2.47102e-05	0.906596	2.13406e-05	0.702648	-0.000561441	0.768791	0.0883533	0.0343993	-0.102362	0.0161955
778	5670528	FTL	-0.00992538	0.851481	0.106379	0.0462383	0.181929	0.0158318	0.0225218	0.759736	-0.000302492	0.327639	0.000205039	0.132663	-7.69886e-05	0.547178	6.48632e-05	0.826788	-0.000140553	0.0744209	0.000306415	0.909505	-0.0290401	0.621547	0.0302326	0.615656
779	2850719	FRMPD2	-0.043275	0.141404	0.0346384	0.222008	0.0241758	0.534005	-0.0288305	0.469635	-0.000158566	0.349335	1.72498e-05	0.820029	7.17557e-05	0.281052	-4.66706e-05	0.775575	-4.72401e-05	0.264886	0.00126522	0.380306	-0.00992369	0.756314	0.000253382	0.993797
780	5560292	CASP1	0.0111979	0.736813	0.0378772	0.238239	0.0933673	0.033902	0.0474205	0.293542	0.000193684	0.31268	-3.90984e-05	0.648799	-6.1755e-05	0.412587	-2.12986e-05	0.90852	5.13883e-05	0.284104	0.000732981	0.653509	-0.0456803	0.20709	-0.0225656	0.540849
781	4640386	CST5	0.0167294	0.593645	0.0241271	0.427874	0.107862	0.0101704	0.0500581	0.239724	-7.66519e-06	0.96622	-2.32708e-05	0.772911	-3.25047e-05	0.655179	0.000136822	0.433013	1.19834e-06	0.979055	-0.00117243	0.44887	0.0209957	0.53827	0.0175334	0.615259
782	1230706	M6PRBP1	-0.155765	0.00121211	-0.181341	0.000187355	-0.0240055	0.72687	-0.121069	0.0710833	-3.33927e-05	0.905418	6.71927e-05	0.587669	-0.000229602	0.0466097	-0.000359013	0.182041	3.00499e-05	0.674281	-0.00573543	0.0193002	0.0782952	0.143439	-0.0813347	0.136299
783	5890600	PDE1A	7.36684e-05	0.997779	-0.00119709	0.962844	0.0685465	0.0504719	-0.0369724	0.30654	-5.68297e-06	0.970448	6.64786e-05	0.329936	-1.43628e-05	0.810381	-0.000257405	0.08019	-1.62318e-06	0.966147	0.00118514	0.364752	-0.0319716	0.267546	-0.00708644	0.810247
784	3390554	DAZL	0.0716271	0.0261132	0.0371095	0.234912	-0.0474431	0.265867	0.0270648	0.537172	-0.000335458	0.0720091	-1.01966e-05	0.902121	4.30118e-05	0.560707	0.000314796	0.0785777	3.29349e-05	0.481036	0.00227181	0.153567	-0.00752441	0.8297	-0.0130539	0.716472
785	3310309	CLEC3A	0.0381355	0.246782	-0.00209741	0.947581	0.00368403	0.932695	-0.0944905	0.035173	-0.000157421	0.408352	3.54044e-05	0.676599	1.253e-05	0.866526	0.000138906	0.448139	3.59983e-05	0.448939	-0.000680001	0.675151	-0.0143455	0.689077	0.0226249	0.53671
786	730435	NAG6	-0.0308737	0.509094	-0.000947849	0.983942	-0.0296911	0.655694	-0.0521237	0.42242	0.000337485	0.215686	0.000227878	0.0581664	-5.0172e-05	0.65647	-0.000530815	0.0423614	-2.16951e-05	0.754899	0.00108723	0.647505	0.011927	0.818255	0.0718491	0.175958
787	6450551	HTRA1	-0.11332	0.0175335	-0.169697	0.0003957	-0.27749	4.60594e-05	-0.14226	0.0310823	0.000501131	0.0707165	-0.000201117	0.101617	-6.47175e-05	0.573748	6.67383e-06	0.980063	-0.000104455	0.139753	-0.00330326	0.171097	0.0491379	0.353154	-0.0254089	0.635854
788	5420446	SPINK5	-0.0221758	0.474761	-0.0316535	0.28984	-0.0405762	0.322169	-0.0978458	0.0199363	0.000262072	0.142351	-1.71599e-05	0.830032	-4.14658e-05	0.554635	1.73504e-05	0.919927	-1.87317e-06	0.966554	5.88063e-05	0.969148	-0.00571682	0.865356	-0.00370923	0.914034
789	5090670	OTUD7	0.0175658	0.513705	-0.001005	0.969527	0.0285477	0.42409	0.0120761	0.744384	6.84137e-05	0.662669	6.21381e-05	0.370657	-0.000133052	0.0287498	1.18462e-07	0.999368	-5.57942e-05	0.152559	-0.002803	0.0363453	0.00428815	0.884058	0.0276121	0.361227
790	5670288	SPATS2	0.0735468	0.016173	0.0147967	0.616906	0.0356865	0.380935	0.0672804	0.104656	-0.000333167	0.0586818	8.39654e-05	0.286091	3.71709e-05	0.596388	-4.44732e-05	0.793849	-5.35935e-07	0.990347	0.000481098	0.749006	-0.0172458	0.604084	0.0547367	0.10662
791	2760215	MICA	0.0587729	0.559004	-0.0581809	0.566733	0.0581215	0.687841	0.0894429	0.522964	-0.000467917	0.424817	-9.41862e-05	0.716584	0.000255642	0.288081	0.000391582	0.486518	-0.000137435	0.357053	0.000538677	0.916015	-0.00348384	0.975176	-0.0932196	0.409652
792	520594	CLDN3	0.0508007	0.0558696	0.0149494	0.559711	-0.00512323	0.883992	-0.0178914	0.618876	7.48405e-05	0.625437	5.06899e-05	0.458067	-1.36979e-05	0.823453	3.90274e-05	0.791556	-1.59982e-05	0.678393	-0.000630743	0.629378	-0.00638834	0.824318	-0.00364556	0.901756
793	540164	KCNIP2	-0.0528449	0.0711748	-0.00755771	0.78891	-0.00701093	0.856201	-0.00618188	0.876205	-0.000442928	0.00862145	9.02366e-05	0.23177	-8.63804e-06	0.896261	-4.25522e-05	0.793959	8.93172e-05	0.0341711	-0.0026788	0.0619847	0.0139643	0.660832	0.0087573	0.787163
794	270626	FLJ45910	0.057225	0.0238695	0.00183996	0.940727	0.0562514	0.0943565	0.00591287	0.864888	-6.51067e-05	0.658659	-1.3946e-05	0.830894	-8.11649e-05	0.161588	0.000316715	0.0244402	-2.77785e-05	0.450659	-0.00132138	0.294684	-0.0214552	0.437142	0.0134393	0.636886
795	6940475	HIST1H1B	-0.0227329	0.52088	0.00291198	0.933711	-0.0273795	0.575528	-0.0867119	0.0750599	-0.000100072	0.625797	-5.73387e-06	0.949936	7.63884e-05	0.353675	-5.44918e-05	0.782699	-4.32511e-05	0.403976	-0.000107677	0.951466	0.0124089	0.750402	0.0712376	0.0713858
796	1450095	QTRT1	0.0439985	0.295585	0.0921155	0.0283788	0.0738319	0.208378	-0.067656	0.24626	-1.92838e-05	0.937345	0.000237919	0.0280478	-8.65915e-05	0.384576	0.000384017	0.101703	-0.000142758	0.0216717	-0.00251419	0.238075	-0.0441209	0.342826	-0.0115493	0.808679
797	6560475	PPEF1	-0.0491647	0.0776003	-0.0287316	0.292749	0.0186128	0.623849	0.0205843	0.588811	-7.23848e-05	0.652983	-1.55732e-05	0.828263	-5.13257e-05	0.426469	0.000103394	0.50563	-4.09683e-05	0.313036	-0.00192657	0.16352	0.00529978	0.862233	0.00354302	0.909021
798	5290307	KMO	0.253762	0.00476057	0.295345	0.00113192	0.105284	0.415239	0.125664	0.314661	-0.000462555	0.377074	-0.000206895	0.371768	0.000154403	0.475175	0.00197426	8.75806e-05	-0.00020792	0.119231	0.0026195	0.565811	-0.0621858	0.533979	-0.121636	0.229721
799	430279	CEP72	0.0476095	0.14256	0.0489829	0.126548	0.00388058	0.930132	-0.0507889	0.256021	-0.000198938	0.292187	4.2711e-05	0.609508	9.07252e-05	0.232015	-0.000124103	0.492512	1.8044e-05	0.704901	0.00127989	0.432148	-0.0266143	0.45513	0.0651709	0.0749657
800	1990482	PLD3	-0.0624899	0.0513287	-0.0102068	0.742587	0.0148456	0.728015	-0.0840384	0.0537108	9.33476e-05	0.614255	9.087e-05	0.2708	-9.83564e-05	0.183385	-0.00015062	0.398449	-9.24218e-05	0.0472065	-0.000612106	0.698783	-0.0481851	0.166896	-0.0061144	0.863944
801	5080441	SLC16A8	-0.000196266	0.994518	-0.00158429	0.954719	-0.0553544	0.144358	-0.0288592	0.461213	-0.000129947	0.434159	-5.04761e-05	0.493035	0.000127473	0.0517485	1.37163e-05	0.93114	-1.56757e-05	0.705987	-3.30798e-05	0.981442	0.0462473	0.137313	-0.0253449	0.42986
802	430687	RHOBTB3	0.156851	0.00995947	0.00928097	0.879725	0.00810743	0.925792	0.0682201	0.419768	-0.000552923	0.11892	5.23262e-05	0.738308	-0.000202997	0.166787	-9.45539e-05	0.781274	0.000702934	7.54952e-15	-0.00354243	0.251822	-0.0143501	0.831893	-0.0215977	0.753805
803	1780041	IQCB1	0.00796448	0.803873	-0.0346972	0.276563	-0.0559065	0.210097	-0.0681748	0.124391	0.000178772	0.337878	-0.000102909	0.213373	0.000151038	0.0435779	-0.000280749	0.116606	-8.3088e-05	0.0778916	0.00107487	0.505024	-0.0467317	0.187177	0.0599701	0.0953153
804	3170500	FLJ10925	0.0757588	0.0287691	0.0105368	0.758443	0.059729	0.214833	0.0608095	0.20005	0.000429327	0.0323317	-1.3244e-05	0.881849	-3.66576e-05	0.657514	-5.53357e-06	0.977189	-0.000130676	0.0104543	-0.00277923	0.109181	-0.00337434	0.929443	0.00127583	0.97376
805	3710008	TSGA14	-0.0643488	0.12859	-0.115606	0.00601939	-0.130628	0.027225	-0.130181	0.0257101	0.000392884	0.109533	0.000107885	0.323283	-3.37458e-05	0.734098	-0.000233697	0.323069	-4.42263e-05	0.47699	-0.00561828	0.00812638	0.0597172	0.201742	-0.0577821	0.221564
806	7050706	C12orf5	-0.131794	0.00275228	-0.155549	0.000431903	-0.0669553	0.28712	-0.0831661	0.171681	0.000183406	0.473324	-0.00022006	0.0522722	0.000316506	0.00288105	-0.000659361	0.00746791	0.000138144	0.0342401	0.000831237	0.708803	0.0133019	0.785334	-0.0219378	0.657396
807	1820037	WHSC1L1	0.0851291	0.0239987	0.0299996	0.423472	0.0132919	0.800372	-0.00635287	0.902639	0.000106648	0.626209	0.000131056	0.176871	-0.000131167	0.144249	0.000296084	0.159728	3.06383e-05	0.58203	0.0010973	0.563166	0.0136101	0.743385	0.0204841	0.629169
808	650113	PBX4	0.271861	0.000464289	0.222954	0.00445577	-0.0472865	0.672189	0.21907	0.0424588	-0.000919654	0.0420596	0.000415818	0.0377492	0.00028578	0.126073	-0.00061221	0.159281	0.000144588	0.209754	-0.000463056	0.906432	-0.0749546	0.38559	0.0715154	0.413561
809	5810372	LRP2	-0.0219444	0.392102	-0.0428602	0.0935266	-0.00805718	0.820852	-0.104681	0.00325553	4.94425e-05	0.741022	5.6786e-05	0.389977	-9.182e-05	0.127003	-0.000173288	0.22534	-2.26154e-05	0.54964	-0.00213745	0.0992167	0.0489987	0.0837355	-0.0294244	0.310717
810	5560338	TMEM111	-0.0734672	0.0699606	-0.0829446	0.0420759	-0.102777	0.0772414	-0.179997	0.0013499	-1.42601e-05	0.951767	-0.000215378	0.0392748	0.000151774	0.120323	-0.000179205	0.429948	-6.78543e-05	0.259104	0.00695972	0.000696992	-0.037079	0.410423	0.00537141	0.906137
811	5890717	SUSD3	0.192176	0.0093395	0.260368	0.000470834	0.268139	0.0114222	0.030243	0.768099	0.000265686	0.536872	0.000391026	0.0400927	-0.00038648	0.0298613	0.00127963	0.00198804	-0.000415532	0.000151937	-0.00882232	0.0185586	0.0281888	0.731524	-0.0440225	0.596704
812	4490333	RLTPR	0.0293942	0.534373	0.0988107	0.0381845	0.0498541	0.460763	0.0946299	0.149838	0.000409938	0.136946	0.00035692	0.00336116	-0.000249091	0.0292713	0.000288728	0.275376	-0.000287955	4.20731e-05	-0.00431151	0.072834	-0.00448099	0.932021	0.0282403	0.598278
813	3420722	SNX7	-0.0119815	0.682034	-0.0218313	0.438247	0.0221682	0.565992	0.0103038	0.794586	-0.000182515	0.278365	-1.14451e-05	0.879185	-5.21747e-05	0.432871	-3.21317e-05	0.843405	4.05692e-05	0.336235	-0.00158636	0.268255	-0.013468	0.671336	0.0626081	0.0532545
814	7100474	SNX7	0.00259673	0.937072	-0.0289068	0.367903	0.0286	0.512227	0.00749914	0.868209	-0.000299709	0.117527	4.2226e-05	0.618767	-6.02854e-05	0.417785	0.000122793	0.501753	-4.48302e-05	0.346796	-0.000132863	0.935201	-0.00524012	0.884022	0.0139058	0.706212
815	6280008	CLDN12	0.0319082	0.319784	0.0616852	0.0485285	0.0233468	0.587905	-0.0202733	0.643026	-0.000171219	0.356143	-4.08052e-05	0.621118	6.27185e-05	0.39842	0.000246676	0.167044	-3.84922e-05	0.410035	0.000872595	0.583078	0.0351651	0.314803	0.0422015	0.238254
816	7040187	ARRDC4	-0.217043	0.000846384	-0.412851	2.69259e-10	-0.307324	0.000901518	-0.361707	6.29103e-05	0.00103173	0.00647944	-0.000345836	0.0391203	-0.000187878	0.224834	-0.000324315	0.372232	-7.97863e-05	0.407564	-0.00465805	0.157811	-0.0993211	0.169129	0.0209556	0.774644
817	5080725	HSP90AB2P	-0.0294658	0.280981	-0.0368586	0.165001	-0.0583087	0.111397	-0.0151716	0.683143	-0.000151056	0.337894	1.46394e-05	0.835278	4.31072e-05	0.491452	-1.67502e-05	0.912363	-2.35988e-05	0.551346	-0.000377785	0.779176	0.0342092	0.251167	-0.0633028	0.0369438
818	3180719	NF1	0.112821	0.000516813	0.0403598	0.204897	0.0117232	0.791739	0.0176139	0.690876	0.000160352	0.393051	-1.66579e-05	0.84201	1.02331e-05	0.893678	0.000241545	0.182598	-3.80254e-05	0.424352	-0.000285979	0.859462	-0.0148901	0.675448	0.0460738	0.203516
819	620349	NIT2	0.0255237	0.580588	0.000267502	0.995411	-0.0624252	0.343831	-0.069881	0.275829	0.000444717	0.0983552	-8.42838e-05	0.478257	-0.000105474	0.344096	5.07018e-05	0.844472	-9.8442e-06	0.885935	0.00187397	0.424306	-0.0407305	0.42705	-0.0150058	0.774092
820	4210390	C7orf21	0.0592509	0.107637	0.0831075	0.0201237	0.0262576	0.596409	0.0172844	0.729186	-6.54255e-05	0.758049	0.000195701	0.0386136	-1.31655e-05	0.878901	-3.48223e-05	0.865187	4.06105e-05	0.450186	0.00123524	0.497164	-0.0134146	0.737865	0.0289325	0.479956
821	4780730	C9orf150	0.0176099	0.532757	0.0131075	0.638052	0.0103324	0.789832	-0.01756	0.65128	0.000101075	0.537101	-6.54024e-05	0.368944	5.86716e-05	0.369574	1.70859e-06	0.991339	-5.85226e-05	0.15624	0.000755961	0.591895	-0.0643079	0.0384403	0.0411904	0.191549
822	6660603	YWHAZ	-0.0865526	0.347038	-0.0982157	0.287991	0.0291993	0.824518	-0.379999	0.00281368	-2.53495e-05	0.962196	-0.000239918	0.311379	2.01099e-06	0.992797	0.00144382	0.00510799	1.5596e-05	0.90905	0.00710909	0.126672	0.0044871	0.964951	-0.0245658	0.812458
823	7210056	YWHAZ	0.0360601	0.218386	0.069066	0.017972	0.0298592	0.469873	-0.0101861	0.800355	-0.000333692	0.0494987	-2.50338e-05	0.739801	5.39504e-05	0.444496	0.000207303	0.205914	6.56889e-05	0.129426	0.00367282	0.0127512	0.012719	0.694289	0.0489144	0.136821
824	6200674	RP11-311P8.3	-0.0450981	0.263034	-0.0382438	0.346268	-0.0450336	0.433052	-0.0447494	0.42629	-0.000117861	0.616773	-5.10248e-05	0.623126	0.000133741	0.161867	0.00017561	0.435062	9.46829e-05	0.11315	0.00283519	0.167112	-0.0486887	0.277357	0.0478084	0.294418
825	940730	ODF2L	0.0868695	0.0694932	0.0818462	0.0901404	0.0384115	0.576073	-0.07148	0.282828	0.000588874	0.0347419	-9.78173e-05	0.427343	-7.41477e-05	0.520117	0.000520833	0.0518591	-0.000184624	0.00939443	0.0009813	0.686402	0.0125859	0.813015	0.0132178	0.806799
826	5050370	C9orf88	0.0630717	0.522304	0.158434	0.111426	0.301494	0.0335045	0.414635	0.00250397	-0.000404539	0.481266	-0.000332023	0.191603	0.000156535	0.507365	5.88345e-05	0.915067	-7.92947e-05	0.587703	-0.00907427	0.0697677	0.0941785	0.390698	0.00616728	0.95561
827	540762	FLJ25416	0.0334407	0.408507	0.0233143	0.567621	-0.0586624	0.308687	0.0457926	0.415855	-0.000160154	0.497469	4.52206e-05	0.663903	3.7065e-05	0.704266	0.000316808	0.161391	3.7825e-05	0.529525	0.000220194	0.914899	0.0426315	0.342696	0.019819	0.666974
828	3140326	TRIM9	0.0397376	0.203405	-0.0280568	0.364233	0.0178422	0.678409	-0.0281752	0.512184	-4.60864e-05	0.79951	-0.000142714	0.0759275	9.15842e-05	0.214379	6.06662e-05	0.727671	-4.68714e-05	0.307995	0.00177469	0.257991	0.00258732	0.93995	0.0195084	0.578951
829	3930050	TRIM9	-0.0518639	0.16656	0.015062	0.685811	0.0922844	0.074008	-0.046511	0.368595	-0.000328846	0.131772	5.19837e-05	0.590089	2.06623e-05	0.816004	0.000162619	0.436531	8.80803e-05	0.1112	0.00145238	0.442464	-0.0164293	0.690423	0.0179484	0.672368
830	4890398	HIGD2A	-0.0565333	0.0768133	-0.0168511	0.600134	-0.0289719	0.525695	-0.0497144	0.261639	0.000541883	0.00356118	-8.36385e-05	0.30895	-5.48179e-05	0.477873	-0.000207004	0.247073	-0.000130589	0.00592303	0.00248478	0.125073	0.0040694	0.90863	-0.061846	0.0866296
831	5870367	FLJ43826	-0.0178665	0.512307	-0.0173589	0.514004	-0.0674597	0.0621678	-0.0591505	0.11416	0.000119552	0.451155	-8.15883e-05	0.24612	-2.06841e-05	0.737366	-0.000306978	0.0428062	1.89129e-05	0.632005	0.00184073	0.173967	0.0521014	0.0801156	-0.047423	0.120728
832	780750	AMELX	0.00994848	0.687294	0.0399382	0.101412	0.0584333	0.0832722	0.0241556	0.477515	8.55378e-05	0.551473	-0.000136712	0.0317355	-1.84039e-05	0.749691	0.000292674	0.0335244	-1.59769e-05	0.659259	0.000674161	0.586087	0.0225049	0.406812	-0.00409113	0.882927
833	5560241	FAM53A	0.0184021	0.539032	0.0572312	0.0547437	0.0682362	0.097724	-0.0171106	0.680364	0.000308969	0.0772703	5.78856e-05	0.453262	-3.7031e-05	0.597329	-7.78107e-05	0.640966	-4.90859e-06	0.911377	-0.00299324	0.0480544	0.0441472	0.181468	-0.0423443	0.213125
834	1230575	LOC90624	0.0818208	0.11224	-0.0526633	0.309497	-0.0208954	0.774465	-0.0653813	0.361379	0.000540741	0.0720465	9.08822e-05	0.49293	7.20882e-07	0.995351	0.000143632	0.61773	-9.03018e-05	0.237937	-0.00258908	0.323538	0.0196278	0.731275	0.0114572	0.845159
835	2370037	CALML4	-0.177042	0.0264104	-0.240451	0.0027919	-0.0858527	0.452757	-0.191854	0.0841549	0.000741446	0.110891	-0.000153437	0.455783	-0.000315802	0.0960549	-0.000567346	0.203165	-0.00017558	0.13755	0.000434424	0.914594	-0.053123	0.549434	-0.0130826	0.88394
836	2940475	CALML4	-0.146237	0.064678	-0.214952	0.00716548	-0.13062	0.251248	-0.195685	0.0757593	0.000720105	0.118632	-0.000265129	0.193972	-0.000235607	0.214097	-0.000455828	0.303425	-0.000239985	0.0410398	0.00340435	0.397078	-0.0800944	0.363255	-0.0183717	0.836563
837	6660768	EXOSC7	-0.0298192	0.295141	0.0649484	0.0232729	0.0816841	0.0435683	-0.0322948	0.413489	-1.54932e-05	0.925568	3.95776e-05	0.589065	-7.65599e-05	0.265239	0.000126081	0.428649	-2.30088e-05	0.586487	0.00133304	0.356419	0.00574783	0.855577	-0.0222241	0.490942
838	670392	C3orf23	-0.00933579	0.743978	-0.0176997	0.527717	0.0139029	0.72096	-0.0151704	0.698077	0.000190877	0.247913	-0.000199214	0.00687269	-2.63938e-05	0.688894	0.000169057	0.288809	-3.40499e-05	0.413213	-0.000803264	0.571169	-0.00580312	0.85317	0.00547058	0.863406
839	6620307	EXOSC2	0.0978685	0.0590213	0.0137797	0.792266	0.014978	0.840203	0.131602	0.0682249	0.000107848	0.721343	0.000178458	0.181155	-7.72569e-05	0.53562	-0.000337512	0.244451	-1.61287e-06	0.983291	-0.0027599	0.295195	0.0425413	0.460446	-0.00513548	0.93025
840	6980307	C3orf20	0.021113	0.493936	0.0125994	0.674847	0.0265421	0.516428	0.0404869	0.338157	-0.000216251	0.227628	5.88994e-05	0.459372	0.000114588	0.100761	-0.000104831	0.541205	5.05656e-05	0.257447	0.00130713	0.39247	-0.00661143	0.844297	0.000900197	0.979183
841	3990192	AHSA1	0.0359472	0.44267	-0.128666	0.00626794	-0.078882	0.238487	-0.0871403	0.179358	3.35465e-05	0.901939	0.000152579	0.206549	-3.27318e-05	0.769808	-0.000498719	0.0569357	0.000182192	0.00857119	-0.000134376	0.95476	-0.0292204	0.574309	0.022766	0.664375
842	6650689	TTN	-0.01169	0.686661	0.0329116	0.239279	-0.0642035	0.09366	-0.0832187	0.0343116	1.80892e-05	0.913772	-9.11316e-05	0.222326	0.000156455	0.0170292	0.000146298	0.364104	-3.25911e-05	0.435103	4.27905e-05	0.975998	0.0840203	0.00765427	-0.0222167	0.489281
843	5390100	RRM2B	-0.0113863	0.801339	-0.0631142	0.166337	-0.0439491	0.496432	-0.00119159	0.984876	-0.000105427	0.689297	-0.000397242	0.00064362	0.000117448	0.28284	0.000801496	0.00154794	6.00714e-05	0.371817	0.00050932	0.824729	-0.0247269	0.622628	-0.0714531	0.163789
844	3190133	STAT1	0.133699	0.103185	-0.0402279	0.627055	0.175777	0.136138	-0.0603822	0.596889	7.97872e-05	0.867435	0.000196398	0.353679	-0.00041299	0.0348294	-0.000291461	0.525381	-0.000154222	0.204849	-0.0126861	0.00231263	0.197325	0.0307393	0.0149676	0.870792
845	7050139	STAT1	0.0676889	0.501727	-0.0225537	0.824365	0.115158	0.42725	-0.103964	0.457292	-0.000180783	0.757848	-0.000177769	0.493892	-0.000298997	0.217125	0.000535998	0.342332	-8.05972e-05	0.589773	-0.00963189	0.0592314	0.238468	0.0333852	-0.0246085	0.827902
846	2490328	MPZL1	-0.0811524	0.00660848	-0.0431592	0.13371	-0.0719303	0.0683467	-0.0602237	0.13647	8.5196e-05	0.620426	-9.69884e-05	0.207465	1.35511e-05	0.841801	-0.000140425	0.398142	-1.17859e-05	0.784443	0.00166005	0.25685	0.0381221	0.239891	-0.0353303	0.285711
847	620722	RBM4	-0.059208	0.136397	-0.0780832	0.0514831	-0.0511053	0.369707	-0.117626	0.0332525	3.21657e-05	0.889559	3.93395e-06	0.969329	-6.02358e-05	0.530263	0.000252665	0.25618	4.38508e-05	0.457874	-0.000645461	0.749216	0.012286	0.780917	0.0247975	0.581345
848	6620014	RBM4	-0.0655716	0.0954197	-0.0800453	0.0419249	-0.072697	0.185709	-0.0177832	0.744299	-0.000200105	0.38283	5.14954e-06	0.959417	-4.93814e-06	0.958045	0.000415629	0.0582096	8.50466e-05	0.144301	0.000428793	0.829915	0.0248503	0.567582	-0.0175516	0.694964
849	3060202	GRM4	0.00607553	0.818798	0.0158185	0.544135	0.049649	0.168195	0.0405886	0.264422	6.14021e-05	0.689904	4.54324e-05	0.505709	-4.60724e-05	0.457946	-2.87062e-05	0.845906	4.21665e-05	0.277957	-0.0018651	0.159359	0.0133302	0.646165	-0.0173187	0.560816
850	4760010	CABIN1	0.0305479	0.406203	0.104084	0.00479414	0.00673781	0.896231	0.0924668	0.0700649	-8.78262e-05	0.682226	0.000168955	0.074162	-6.7837e-05	0.442128	4.01481e-05	0.844993	-0.000110147	0.0435984	-0.00260746	0.163357	-0.0331675	0.415306	0.0292049	0.486256
851	870753	DOM3Z	-0.00870874	0.793058	0.0523521	0.115463	-0.00901741	0.846385	-0.0707987	0.124191	0.000352894	0.0682841	9.72868e-05	0.25474	-0.000210006	0.00815591	-7.59196e-05	0.682024	-4.27379e-05	0.385134	9.91222e-05	0.953118	0.0079539	0.828568	0.0485743	0.198454
852	1410521	RPL10	-0.0541143	0.0668095	-0.0221638	0.442498	-0.0503577	0.198845	-0.0332349	0.413271	-0.00016859	0.327145	0.000108146	0.155708	-7.97637e-05	0.23274	-5.68784e-05	0.728831	-4.92245e-05	0.250199	-0.00113057	0.441594	-0.0307592	0.340376	0.035078	0.290345
853	4050066	FZD1	-0.122245	0.000597939	-0.105653	0.00243568	-0.157025	0.000902688	-0.0569101	0.245386	0.000104406	0.614968	-0.000133171	0.147165	3.16033e-05	0.697005	-0.00026194	0.185618	-1.15255e-05	0.823767	0.000355673	0.841237	0.0258408	0.506385	-0.0084912	0.832308
854	6110390	FARP2	0.0442429	0.147524	-0.0216215	0.477421	0.00409687	0.923305	0.0510246	0.226986	0.000216552	0.223185	-3.29415e-05	0.675304	3.21341e-06	0.964598	0.00029909	0.0793084	-3.77269e-05	0.402857	-0.000901347	0.558909	-0.0154612	0.646585	0.0362427	0.29328
855	5860292	TANK	0.0635995	0.0283612	0.00636959	0.822287	0.0410615	0.286477	0.0441478	0.2672	0.000103694	0.538997	-2.98088e-05	0.690181	4.06594e-05	0.542091	-3.52871e-05	0.826727	2.02763e-05	0.631177	0.00216056	0.13506	-0.000165127	0.995832	0.0296233	0.36411
856	940204	ARHGEF17	-0.0332846	0.256371	-0.0614739	0.0297418	0.00526047	0.892019	-0.0464826	0.241854	-0.000163536	0.333654	-7.7592e-05	0.303725	3.24063e-05	0.6303	0.000324125	0.046795	1.86723e-05	0.660265	0.000245048	0.864966	-0.0386591	0.224012	0.032103	0.324209
857	460224	APIN	0.029925	0.338973	0.0194547	0.531196	-0.0743612	0.0867965	0.0249235	0.563453	0.000169091	0.352414	-4.88481e-05	0.544337	3.82377e-05	0.605246	6.08145e-05	0.727635	-1.58762e-05	0.730588	0.000571819	0.716416	0.0265034	0.442177	0.00653937	0.852615
858	2570438	PDLIM2	-0.175984	1.95721e-05	-0.101111	0.0129014	-0.118299	0.0345507	-0.18995	0.000837655	0.000277473	0.247773	-0.000120011	0.258597	-0.000151561	0.111937	9.27408e-05	0.686032	-5.91724e-05	0.32655	-0.00146785	0.47755	-0.0175785	0.697731	-0.0579343	0.212264
859	20373	PTTG1	-0.0834456	0.102182	-0.0210009	0.680623	-0.0491888	0.496598	-0.081134	0.248803	0.000214056	0.470042	-0.000355017	0.00690359	0.000328869	0.0075115	0.000415264	0.146081	-8.84134e-05	0.242008	0.0106615	3.46523e-05	-0.0653202	0.247584	0.00806956	0.88808
860	630743	POLDIP3	-0.0243508	0.492793	-0.000798879	0.981917	-0.0496422	0.31139	-0.0724118	0.139252	7.96973e-06	0.969214	4.89718e-05	0.592039	-3.3678e-05	0.688348	0.000130395	0.510127	7.88976e-06	0.880166	0.000799803	0.654744	0.0301511	0.440463	-0.0327359	0.414096
861	6270300	POLDIP3	-0.0293719	0.414718	0.0135925	0.704964	-0.0151653	0.765381	0.00731424	0.882615	-3.8258e-05	0.854664	5.41251e-05	0.559077	-1.71024e-05	0.84375	1.17331e-05	0.953556	-5.40048e-06	0.919249	0.00149661	0.409259	-0.0457574	0.250107	0.0207438	0.60797
862	4040551	ENTPD8	-0.0254984	0.374481	0.00920415	0.744739	0.0884352	0.0254407	0.0634661	0.105852	-0.00013483	0.416816	-3.03424e-05	0.681233	-3.44647e-05	0.611978	0.000159441	0.319748	-6.41437e-06	0.879051	0.000175647	0.902394	-0.0434831	0.167649	0.0904688	0.00477685
863	1710215	KCNT2	-0.0322983	0.291779	0.0376837	0.213061	0.0104574	0.802157	0.0324669	0.442453	-0.000221352	0.214708	8.44407e-05	0.284781	-3.89045e-05	0.584729	-5.93429e-06	0.972248	2.71816e-05	0.544929	-0.000282967	0.854007	0.0181643	0.589414	-0.0491457	0.154786
864	2350338	XKR8	-0.0777032	0.0200826	-0.0603737	0.0656161	-0.0243067	0.590445	-0.0866923	0.0591549	0.000299083	0.123361	-0.000168721	0.0502732	8.12919e-05	0.288361	-5.43053e-06	0.976717	-6.33237e-05	0.193138	-2.2268e-05	0.989327	0.0063284	0.86289	0.0149288	0.689702
865	7150376	PEF1	0.0299938	0.474391	0.0853776	0.0408181	0.0201242	0.731919	0.00416048	0.942564	-0.000138761	0.568584	-1.3961e-05	0.897027	5.79832e-05	0.563255	-0.000198944	0.395758	5.16765e-05	0.404266	0.00211786	0.31595	0.0133821	0.772413	-0.000834368	0.985883
866	130634	PIAS2	-0.0243606	0.390603	-0.0517581	0.0584321	0.00684607	0.85508	0.00746616	0.846023	7.96923e-05	0.625693	-4.80711e-05	0.510847	-4.21853e-05	0.511032	-6.76003e-05	0.668468	-3.20945e-05	0.43213	-0.00069068	0.619407	0.0221774	0.472	-0.0525568	0.09443
867	4760288	PIAS2	-0.019941	0.706995	0.0465761	0.384093	-0.0141413	0.852697	0.00457834	0.950482	-0.000222433	0.471637	5.04444e-05	0.71196	8.4531e-05	0.508394	0.000278006	0.349221	-8.66023e-05	0.271636	-0.00531193	0.0485055	0.0568823	0.334798	0.0359044	0.548569
868	7050239	FRMPD2	-0.0400039	0.191642	0.0017061	0.954512	0.0655647	0.106803	-0.0203802	0.628181	-2.31748e-05	0.896607	-2.2328e-05	0.777546	-8.13691e-05	0.24154	7.19528e-05	0.672599	-4.00025e-05	0.367803	9.08452e-05	0.952429	-0.00531209	0.873811	-0.029709	0.387489
869	4260519	MADD	0.00533151	0.853275	-0.0243653	0.387516	-0.0386656	0.316976	-0.0374424	0.344186	0.000107258	0.52188	-5.17204e-05	0.486628	8.7695e-05	0.181838	-0.000160004	0.318457	4.58933e-05	0.273005	0.000208196	0.884486	-0.000108963	0.997244	3.30373e-05	0.999183
870	610452	ENTPD2	-0.00755616	0.80828	-0.00706156	0.813596	0.00773494	0.850748	-0.0230622	0.583522	4.7371e-05	0.791583	5.45045e-05	0.496178	-5.73797e-06	0.935932	-8.36049e-05	0.629206	-7.32421e-05	0.103899	0.00100751	0.508937	-0.0045498	0.892729	-0.0417328	0.226318
871	4880424	USP26	0.00173063	0.947389	-0.00748839	0.770617	0.0223732	0.520884	-0.0455262	0.206612	0.000115194	0.450919	1.33235e-05	0.843829	-1.93032e-05	0.748371	-0.000243851	0.0942622	-3.03898e-05	0.426139	0.000189148	0.885127	-0.0208785	0.465539	-0.00534731	0.856486
872	4920671	ADAMTS1	-0.0524377	0.230879	-0.0844071	0.0526911	-0.010636	0.861909	-0.0778281	0.197465	-8.96175e-05	0.724532	-1.03925e-05	0.926517	-0.000218839	0.035192	-0.000133017	0.586217	6.39064e-05	0.322405	8.59906e-05	0.968889	0.00399947	0.934024	0.00512165	0.917119
873	770239	DHDDS	0.0401994	0.206248	0.0784697	0.0133147	0.0487558	0.275423	0.14049	0.00135673	-7.29067e-05	0.692933	-7.38569e-05	0.367189	-3.49792e-05	0.644438	-0.000249229	0.160821	6.67338e-05	0.155262	0.00136149	0.395319	0.0448224	0.202234	-0.0572093	0.108907
874	4040424	MYO18A	0.0929292	0.062375	0.0567138	0.255295	0.00720212	0.917398	0.0648841	0.34805	-6.6714e-05	0.818584	0.000224183	0.0806958	-3.43003e-05	0.772627	-0.00033646	0.226407	-9.59345e-06	0.896589	-0.00176504	0.485547	0.00229002	0.96685	0.0759789	0.180948
875	1110528	MT3	-0.0485867	0.208297	0.00225105	0.952788	-0.0694897	0.189698	-0.156662	0.00309033	0.000456625	0.0409307	-9.72577e-05	0.328709	5.12304e-05	0.567	-0.000151744	0.481144	-7.51287e-05	0.182537	-0.00271646	0.15753	0.0503245	0.235825	0.00236582	0.956122
876	6960537	ZNF452	0.031679	0.190881	0.0321094	0.179278	0.03791	0.248217	0.0459071	0.169668	-8.07798e-05	0.567165	8.23984e-05	0.186816	-2.69039e-05	0.631898	-0.00010975	0.415473	2.00132e-05	0.572614	-0.00312475	0.0101898	0.0132301	0.618699	-0.00267544	0.922115
877	2970670	GNA14	-0.000232719	0.993943	-0.00929428	0.756469	-0.0484522	0.244265	-0.00756272	0.856451	0.000167701	0.343508	-0.000189454	0.0163907	5.63578e-05	0.428524	-0.000170119	0.319411	-7.70873e-05	0.0845027	0.00179776	0.236696	-0.00464401	0.889878	0.0123885	0.716464
878	7330270	AKAP3	-0.0651782	0.0574198	-0.0344348	0.314623	0.0244211	0.609162	0.0441636	0.352258	-0.000286294	0.151963	-1.40817e-05	0.87326	7.91283e-05	0.332942	0.000339546	0.0760376	-7.45601e-06	0.883199	0.000187562	0.914022	-0.0119068	0.753208	0.052996	0.173534
879	3310348	AGRP	-0.0456558	0.185654	-0.0748784	0.0277988	-0.0518473	0.277264	-0.0400268	0.396501	0.0004939	0.0133438	-7.74402e-05	0.382948	-0.000255899	0.00175382	-0.000398274	0.0386395	-6.04016e-05	0.233452	-0.00387588	0.0245093	0.0730049	0.0541196	-0.0525258	0.172968
880	630463	FLJ25369	0.00707144	0.807421	-0.0340352	0.231938	0.0499162	0.20537	0.0509073	0.200812	0.000150415	0.37083	1.04719e-05	0.88866	3.28939e-05	0.622165	0.000102013	0.527978	-9.72949e-06	0.817906	0.000307968	0.830984	-0.0593181	0.0623395	0.0566937	0.0797783
881	610593	ZNF559	0.00621696	0.921385	-0.122344	0.0542139	-0.0868791	0.334908	0.0702043	0.423007	0.000480599	0.190771	3.43849e-06	0.983074	1.62701e-06	0.991464	0.000371247	0.292177	1.08048e-05	0.908142	-0.00300323	0.348624	0.0749917	0.283976	-0.0657213	0.357787
882	5860358	LOC56901	0.0659663	0.0312592	0.0354178	0.228785	0.0866056	0.0321326	0.115519	0.00518587	-0.000173902	0.323933	6.9536e-05	0.377089	-6.4181e-05	0.362965	0.000420637	0.0134972	1.37369e-05	0.75686	0.00100029	0.504889	-0.031138	0.347555	0.0588132	0.0829888
883	3290161	PPM2C	-0.0588772	0.295702	0.0397279	0.479353	-0.0106193	0.892959	-0.00233699	0.976027	-1.68601e-05	0.958921	-0.000115462	0.425587	0.000180738	0.178301	0.000165044	0.599681	-8.5853e-05	0.302338	0.00301656	0.288551	0.0103317	0.868077	0.0194373	0.759385
884	670671	JMJD2A	0.03148	0.253244	0.000193235	0.994435	0.0274693	0.480589	0.0569639	0.137578	-0.000125042	0.437137	-8.13164e-06	0.908716	-2.87194e-06	0.965174	0.000318029	0.0386929	2.17091e-05	0.59543	-7.30649e-05	0.958469	0.0217094	0.477765	-0.0128729	0.681542
885	3990048	CSNK1D	0.180442	0.0347379	0.212702	0.0135564	0.239904	0.0509324	0.3819	0.00128071	-0.000970544	0.0509625	0.000271841	0.217437	0.000198724	0.333202	-0.000463231	0.33306	0.000270712	0.0327002	-0.000938528	0.828419	-0.0140402	0.882578	0.124328	0.195064
886	4490554	CSNK1D	0.0532667	0.487042	0.096381	0.212047	0.117236	0.286754	0.184674	0.0825378	-0.00048727	0.27451	0.000106305	0.59084	7.62964e-05	0.67772	-0.00070835	0.0986491	0.000349733	0.00207844	0.00426972	0.271535	-0.0438028	0.607365	0.0740285	0.389024
887	3400082	SPOP	0.0399491	0.139008	0.0199182	0.446288	0.0302928	0.396515	0.0618479	0.0927274	-0.000100579	0.519562	7.46732e-05	0.283387	6.58043e-05	0.281355	-9.03337e-05	0.547446	4.43216e-05	0.25547	2.30032e-05	0.986205	-0.0440951	0.133585	0.0330563	0.271112
888	2470471	DUSP4	-0.124844	0.45534	0.1265	0.453593	0.239262	0.320319	0.136916	0.555882	-0.000814993	0.402538	-0.000246826	0.567377	0.000474279	0.23603	1.69631e-05	0.985541	-0.000239963	0.33321	0.0274037	0.00123213	-0.10978	0.555404	0.183635	0.327476
889	6220669	TBX6	0.00276903	0.926034	-0.0102081	0.725817	0.0447914	0.257715	0.0529375	0.196112	-4.32457e-06	0.980122	-3.7317e-05	0.627654	-6.26205e-05	0.354813	-3.07556e-06	0.985198	-8.27153e-05	0.0557718	-0.000409383	0.782373	0.00704442	0.828685	0.00947162	0.777103
890	670184	ADAMTS12	-0.028133	0.269643	-0.0125894	0.607524	0.0502947	0.134926	0.0281581	0.41344	4.03391e-05	0.783346	-1.49064e-05	0.820112	3.93812e-06	0.946233	5.74548e-05	0.68515	9.97021e-06	0.78675	0.000780016	0.532092	-0.0315099	0.253845	-0.0098813	0.726306
891	3390398	CXCL6	0.00794137	0.821508	0.0967713	0.00543873	0.0394292	0.411196	0.127038	0.00881396	-0.000115224	0.573846	1.40445e-05	0.876862	-5.08083e-05	0.538961	0.000213684	0.275669	4.7472e-05	0.358957	0.000123481	0.9444	0.0281644	0.465894	-0.0819189	0.0396113
892	4730040	TMEM2	0.290398	0.00900281	0.324885	0.00380382	0.28267	0.0774568	0.372553	0.0159922	-0.000737094	0.255044	-0.000222553	0.43788	0.000430695	0.105666	-0.000446483	0.473159	0.000555051	0.000762586	0.00481775	0.392982	-0.0175506	0.887236	0.0884791	0.478365
893	4250347	DLGAP4	0.00515422	0.868659	-0.0174932	0.564869	-0.0169687	0.687427	-0.0366167	0.387825	-1.72493e-05	0.923618	3.22584e-05	0.687465	-6.60761e-05	0.363557	4.02938e-05	0.81654	-3.4269e-05	0.451091	-0.00183009	0.235563	0.038512	0.257759	-0.091954	0.00801737
894	6280209	DLGAP4	0.0868187	0.0300193	0.000374203	0.992575	0.043905	0.439019	0.0558628	0.314243	-4.80885e-05	0.836555	2.97567e-05	0.77248	-0.000103717	0.282126	-9.42421e-05	0.673517	5.48424e-05	0.356085	-0.000813351	0.689009	0.0573996	0.195643	-0.0190257	0.675234
895	1190136	KCNQ1DN	-0.0164253	0.607112	0.0238799	0.442835	-0.0131565	0.756134	-0.0594511	0.173227	0.000137993	0.456743	-6.16181e-05	0.453964	1.65401e-05	0.822068	0.00014054	0.428517	3.30872e-05	0.476474	-0.000224033	0.887685	0.0281045	0.418545	-0.000351562	0.992166
896	7040753	C12orf23	0.0483726	0.262716	0.0261196	0.544868	-0.0127445	0.831702	0.0408463	0.495885	-0.00010749	0.669971	-2.70933e-05	0.807553	0.000154691	0.129137	0.000196697	0.413895	6.94465e-05	0.276422	-0.00337644	0.123308	0.0442957	0.353547	0.0569009	0.247189
897	1570674	BTBD7	-0.032988	0.27634	-0.00995098	0.735056	-0.0356648	0.379059	-0.027105	0.509875	-0.000315976	0.0709139	-7.88161e-05	0.311677	0.000130882	0.0639227	0.000245955	0.144704	5.63106e-06	0.898579	-0.00064744	0.6654	0.0507684	0.123316	-0.0388485	0.249588
898	6980039	BTBD7	0.033949	0.506064	0.129552	0.0115672	0.023226	0.74815	0.126661	0.0753076	-0.000605865	0.0422627	-0.000223287	0.0897273	0.000310843	0.00978965	0.000163164	0.56683	0.000202452	0.0073871	-0.00163632	0.528199	0.0380833	0.502013	0.0724853	0.208822
899	2070577	NFKBIL2	0.00642027	0.819266	0.0136245	0.619654	0.0145664	0.697972	0.011121	0.773075	6.9713e-05	0.669391	5.07629e-05	0.483631	-5.52968e-05	0.386691	0.00012033	0.441327	3.479e-05	0.393448	0.000476712	0.732693	0.00441555	0.88571	-0.0147732	0.638477
900	1240088	OSBPL10	0.0301366	0.71352	0.0528085	0.523392	-0.000498831	0.996624	-0.277346	0.0149532	-4.03466e-05	0.93271	-0.00013464	0.524371	-0.00031551	0.110475	0.00415862	0	-0.000358382	0.00326809	-0.00109053	0.79332	0.0637646	0.484729	0.281694	0.00230546
901	4850678	PPIL5	0.0617885	0.208293	-0.0751092	0.12784	-0.0624056	0.370997	0.0384675	0.571931	-0.000164582	0.564771	-0.000290773	0.0213461	0.00017882	0.130975	0.000149995	0.58494	0.000162184	0.0261085	-0.000309619	0.901074	-0.0483644	0.374304	-0.0208208	0.707926
902	6350730	PPIL5	-0.0703252	0.0739833	-0.0847222	0.0322072	-0.0505058	0.366455	-0.088636	0.104547	-7.66985e-05	0.737944	-0.000222612	0.0279448	0.000221278	0.0194718	-0.00038257	0.0821358	0.000182402	0.00179756	0.00203893	0.307424	0.0525873	0.228329	-0.0531888	0.232561
903	2940050	CROP	-0.066565	0.319902	-0.135173	0.0451577	-0.179794	0.0590157	-0.230768	0.0132294	0.000535743	0.170219	-9.91863e-05	0.564486	3.94411e-05	0.806932	0.000532467	0.154638	-6.78494e-05	0.495365	-0.00363444	0.286651	0.039433	0.595735	-0.0466935	0.540501
904	1770463	C8orf37	-0.018742	0.570523	-0.0175112	0.593676	-0.00141262	0.975554	-0.071393	0.116888	0.000338829	0.0768858	2.91539e-05	0.732304	-7.78352e-05	0.314474	-1.35071e-05	0.941641	-5.28287e-05	0.275979	-0.00142504	0.389302	0.0236077	0.517667	-0.00345537	0.925334
905	3710360	ZC3H12B	0.0131511	0.817286	0.0262556	0.644622	-0.0625896	0.438447	-0.131637	0.0934221	7.83812e-05	0.812473	0.000201311	0.169517	-0.000173134	0.206859	0.000708512	0.0261378	-0.000236838	0.00494165	-0.00219257	0.445154	0.0119834	0.849174	0.032471	0.611438
906	4150154	WDR23	0.125137	0.00583409	0.127601	0.00510294	0.221767	0.000566982	0.21301	0.000719654	-0.000212636	0.421278	0.000264184	0.023759	-2.31605e-05	0.83124	9.19445e-05	0.716987	-8.10665e-06	0.904124	-0.00267579	0.245155	0.0125564	0.802988	-0.00589671	0.908503
907	70132	LEPREL1	0.0655302	0.243933	0.0374927	0.507099	-0.0266815	0.739362	0.107358	0.168926	3.82422e-05	0.906985	-5.83153e-05	0.687603	-2.04343e-05	0.878848	8.80705e-05	0.779421	-3.4096e-05	0.682184	-0.00713622	0.0122066	0.132589	0.0337815	-0.154457	0.0144157
908	270519	MGC4093	0.0112381	0.813934	0.0727585	0.12783	0.0611383	0.360827	0.0647518	0.328586	-0.000480757	0.0842845	0.000107332	0.382619	-7.24848e-06	0.949021	0.000209186	0.432391	5.47763e-05	0.438192	0.00265273	0.273296	-0.0569684	0.281068	0.0335549	0.53549
909	1770458	KRTAP12-3	0.036918	0.20061	0.010923	0.697406	0.0139091	0.716146	-0.0425773	0.279748	5.7105e-06	0.972784	4.50769e-05	0.544009	-1.50488e-05	0.821203	-9.19232e-05	0.566327	-8.71221e-06	0.83565	0.0022795	0.111516	-0.0174922	0.576939	-0.00994803	0.758326
910	3120356	C6orf205	-0.0376663	0.220136	-0.0444573	0.138436	-0.0137847	0.735306	-0.0737996	0.0802633	-0.000376454	0.0352832	2.58211e-05	0.744502	5.96867e-05	0.393032	0.000111677	0.512995	9.94443e-06	0.823493	-0.000634729	0.677879	-0.0124433	0.710512	0.0411145	0.233398
911	3440209	MAGEB6	-0.047701	0.124092	-0.0133575	0.654178	-0.0744426	0.0690108	-0.0305332	0.465935	0.000223173	0.211334	-0.000137072	0.0856711	6.45958e-05	0.364761	0.000200897	0.244055	2.2032e-05	0.623621	0.00243923	0.108387	-0.00642993	0.848191	0.0153096	0.65589
912	5820039	BC002942	0.0746909	0.0617421	0.0745485	0.0634592	0.0188971	0.739341	0.0515511	0.352191	-0.000184333	0.428344	0.000202737	0.0486767	-2.86419e-05	0.766585	-0.000487012	0.029408	1.95119e-05	0.74243	0.000480136	0.812876	-0.0472322	0.286553	-0.0137625	0.761143
913	2640411	PTGER3	0.00236297	0.940152	-0.00329935	0.914392	0.0163709	0.701139	0.0330263	0.44016	-0.000161501	0.374001	-2.78524e-05	0.730677	-1.76359e-05	0.811361	-0.000104742	0.550405	4.92065e-06	0.914826	-0.00177194	0.255751	0.0477644	0.164363	-0.00710077	0.839426
914	1090296	GRWD1	0.0766971	0.214975	0.0970118	0.119929	0.0499667	0.572691	0.207657	0.0157364	-0.000269365	0.454933	2.89284e-05	0.85579	0.000380937	0.0107045	0.000368896	0.286537	7.58924e-05	0.408965	0.00118244	0.706749	-0.0171385	0.803078	-0.0161096	0.818022
915	1500139	FLJ20397	-0.0707304	0.0284974	-0.0244866	0.433122	-0.0269078	0.52869	-0.00859965	0.84482	-5.88517e-06	0.974835	7.2326e-05	0.384882	2.22506e-05	0.760673	-0.000128697	0.473611	-4.54554e-06	0.922266	-0.000842644	0.595902	0.041146	0.241592	-0.00292244	0.935085
916	2810343	FLJ20397	0.118583	0.00267299	0.0292435	0.460006	0.0798555	0.155993	0.0770313	0.157583	0.000391466	0.0878251	0.000222941	0.0283167	-0.00025232	0.00817032	0.000277034	0.210212	-0.00018532	0.00154124	-0.00389501	0.0508836	-0.0250915	0.566439	-0.00886699	0.841649
917	1050671	GRASP	-0.0603169	0.639088	0.348314	0.00722033	0.127573	0.490386	0.38525	0.03086	-0.00124902	0.0950997	0.000287738	0.385628	1.44461e-05	0.962744	0.000388819	0.589335	7.91919e-05	0.678066	-3.97985e-05	0.995127	-0.0515612	0.718507	0.203104	0.159696
918	5820762	ITIH4	0.0610258	0.506651	0.175806	0.0579223	0.045624	0.729683	0.235149	0.0657006	-0.000784776	0.142618	0.000526105	0.0263733	-0.000258967	0.240127	-4.28115e-06	0.993358	-8.88535e-05	0.514657	-0.00551269	0.23716	-0.0750804	0.4627	0.0955022	0.355519
919	990553	FLJ20647	-0.017842	0.620134	0.0298088	0.41064	0.000306776	0.995204	-0.0275639	0.581621	2.89641e-05	0.890275	0.000156705	0.0905474	-0.000101595	0.241609	0.000638613	0.00150184	-0.000261022	1.06662e-06	-0.00658407	0.000326746	0.0965524	0.0156095	-0.0188133	0.646332
920	5860563	C18orf37	0.0410966	0.542982	0.180308	0.00818271	0.164021	0.0913431	0.294256	0.00173853	-0.000302457	0.442153	-2.04361e-05	0.906636	9.95696e-05	0.538329	0.000290743	0.441849	2.04481e-05	0.838331	0.00131766	0.700732	0.0455569	0.544564	-0.0245907	0.745955
921	5310142	CPB1	-0.00424124	0.874745	-0.00523827	0.845346	0.00530041	0.887605	0.0280395	0.45153	2.92965e-06	0.985086	1.44636e-05	0.834554	-1.42019e-05	0.824371	-8.38062e-05	0.57667	2.9726e-05	0.454997	-0.00145773	0.284415	0.0164495	0.579844	-0.0263004	0.388477
922	1440615	HOXD4	-0.0417256	0.168597	-0.0240802	0.416286	0.0791217	0.049276	-5.60088e-05	0.998926	-0.000110112	0.532597	2.04905e-05	0.79319	-0.000141544	0.040834	0.000216401	0.198826	-1.73535e-05	0.693566	-0.000718778	0.633896	-0.0573039	0.083055	0.0521386	0.126019
923	6840551	KRTCAP2	-0.0671861	0.031631	-0.0682984	0.0299455	-0.0399797	0.367238	-0.0990158	0.0226345	0.000325218	0.0744479	4.09685e-05	0.610417	-4.42982e-05	0.556664	-0.000269596	0.122869	-6.3034e-05	0.174887	0.00355619	0.0254007	-0.0286762	0.408299	-0.015396	0.665288
924	4540072	OR51E1	-0.000103751	0.997283	0.016823	0.572341	0.0175313	0.671598	0.0258538	0.534059	-3.96208e-05	0.821883	0.00011982	0.126873	-0.000176782	0.0122703	-5.00662e-05	0.768164	3.62549e-05	0.414061	-0.0021159	0.161148	0.0128178	0.700739	-0.0134597	0.691341
925	1230564	FBXW11	0.0413413	0.160719	0.0354415	0.211667	0.035593	0.360504	0.109256	0.00613525	9.6803e-05	0.568343	1.93658e-05	0.798513	-7.10285e-05	0.290376	2.56296e-05	0.875752	2.72167e-05	0.522373	-0.00267399	0.0640681	0.0503686	0.115203	-0.0803619	0.0138303
926	7510739	LOC401152	-0.0401386	0.425145	-0.12644	0.0110042	-0.0584054	0.390773	-0.153168	0.0273213	0.000149881	0.609409	3.31273e-05	0.798369	8.52256e-05	0.469138	0.000193403	0.48976	1.79794e-05	0.807746	0.000669086	0.791703	-0.0563694	0.306704	0.0167025	0.769868
927	5220164	FLJ40194	0.0304494	0.345	0.00774808	0.80412	0.00709391	0.867965	0.113228	0.00995279	-0.000105377	0.572168	-0.000166176	0.04554	0.000202344	0.00567417	-7.52039e-05	0.674884	0.000100364	0.0312425	-0.00172373	0.278245	-0.0140004	0.689883	0.0160681	0.654399
928	6060379	C1orf164	-0.0785533	0.0149257	0.0389117	0.226705	0.0139678	0.754503	0.00400926	0.92852	8.98433e-05	0.633077	1.49687e-05	0.857013	-6.65046e-05	0.385262	-0.000242358	0.177953	3.30345e-05	0.48859	0.00146337	0.370897	0.0186087	0.601157	-0.0421132	0.251643
929	1660754	LOC90580	-0.0840562	0.0120188	-0.0885288	0.00866668	-0.10008	0.0363151	-0.0873047	0.0606633	3.49639e-06	0.985703	-7.95183e-05	0.355971	0.000168443	0.0364029	-9.20194e-05	0.622969	0.000114961	0.0207437	0.00270831	0.111382	0.0217598	0.558389	0.00107235	0.977418
930	1410132	C1QDC1	0.132027	0.000467795	0.102702	0.00691966	0.0302191	0.574723	0.0602326	0.250852	-9.69416e-05	0.659458	0.000122444	0.207271	5.6466e-05	0.534993	-0.000195995	0.353119	3.80028e-05	0.498004	-0.0021532	0.261779	0.0201219	0.631126	0.0308757	0.470657
931	670458	PDE4DIP	0.0513996	0.128733	0.0838263	0.0120262	0.0620002	0.17653	0.0542571	0.245013	-0.000110018	0.57673	-1.31131e-05	0.880461	-5.39565e-05	0.491407	0.000231869	0.218187	3.29064e-05	0.506482	0.000832049	0.623994	-0.0113992	0.758837	-0.027589	0.469871
932	5420025	FLJ34443	0.241743	3.10528e-06	0.262964	4.74972e-07	0.164179	0.0269663	0.170941	0.0174601	-0.000130061	0.666451	0.000254589	0.056298	5.30206e-06	0.96626	0.000118253	0.683663	-0.00014608	0.057838	-0.0010939	0.677409	-0.0498192	0.386768	0.0358295	0.540789
933	3940070	FSTL4	0.00205261	0.947019	0.0132157	0.658947	-0.0850552	0.0391687	0.00492336	0.906611	-0.00015194	0.39351	0.000119454	0.133304	5.87037e-05	0.405541	-1.33477e-05	0.93813	4.76709e-05	0.286178	-3.3021e-05	0.982672	0.0038368	0.909245	0.0246969	0.471111
934	6270112	FLJ36888	-0.0384202	0.212644	-0.0128578	0.672813	-0.0873614	0.0404231	-0.00541392	0.898119	-7.98318e-06	0.964316	-7.12562e-05	0.369629	8.71675e-05	0.228426	-0.000213901	0.21382	6.16141e-05	0.172818	0.000800122	0.603254	0.0229368	0.498937	-0.032515	0.34456
935	7200487	HNRPCL1	-0.0230013	0.445851	0.0084276	0.77462	0.035307	0.377684	0.0267284	0.518844	-0.00010144	0.563405	0.00014278	0.0666124	-8.89093e-05	0.192687	-9.96997e-05	0.552158	-1.82616e-06	0.966666	-0.000229362	0.878321	-0.0243858	0.459163	0.0546516	0.106074
936	3290537	SEC24C	0.142772	0.00269777	0.126363	0.00838219	0.0934822	0.168818	0.158637	0.0164264	-9.42682e-05	0.733901	-9.68593e-05	0.428982	0.000227412	0.0473209	-0.000397429	0.135409	1.76498e-05	0.802835	0.00282281	0.242988	0.0292785	0.579552	0.0293207	0.586271
937	4390382	CD99L2	0.0628187	0.0828209	0.0627683	0.0855909	0.102694	0.0470839	0.134362	0.0076709	-3.63145e-05	0.86351	-4.64492e-05	0.618255	-8.80181e-05	0.312322	-1.04112e-05	0.958998	2.55888e-05	0.634383	0.00145238	0.430514	-0.0603077	0.13396	-0.0387296	0.345492
938	5690347	TMSL8	-0.0525228	0.251386	-0.137152	0.00261653	-0.139201	0.0298697	-0.178188	0.00477785	-1.5217e-05	0.954351	-0.000178191	0.130977	0.000170595	0.115328	0.000258521	0.312094	-7.29087e-05	0.279857	0.00012001	0.958436	-0.0762128	0.13188	0.0463845	0.366009
939	7570338	PHACTR2	-0.0761096	0.27979	-0.00460032	0.948374	-0.0826328	0.413859	-0.0881456	0.36796	0.000164535	0.68839	1.23571e-05	0.945694	-0.000306729	0.0701944	-0.000244712	0.5347	-0.000109099	0.296728	-0.0014845	0.677935	0.0540519	0.490043	-0.0923264	0.244863
940	6270082	MCM8	0.1174	0.274334	0.186297	0.0858726	0.388677	0.0115829	0.314248	0.0357126	-0.000732729	0.242431	0.00051534	0.062336	-0.000103602	0.688516	-0.000277445	0.644218	5.13832e-05	0.74748	-0.00212798	0.697071	0.013855	0.90765	0.0564064	0.643004
941	7100605	TOE1	-0.0254236	0.53624	0.0174086	0.673573	-0.0309886	0.595161	0.0365621	0.521707	-0.000508362	0.0338225	0.000103273	0.328757	0.000154556	0.118266	-5.28636e-05	0.818033	0.000106979	0.0796961	0.000344022	0.869172	0.00174146	0.969526	0.0350689	0.452198
942	4560497	HSPA9B	0.0492583	0.265463	0.0845791	0.0567837	0.0158081	0.800747	0.0539443	0.379846	-0.000186612	0.469157	-6.77743e-05	0.551807	0.000232675	0.0275664	2.14352e-05	0.930876	1.52795e-05	0.815713	0.00404317	0.0716181	0.0439687	0.370101	0.011325	0.820833
943	1740341	BIRC4BP	-0.00535531	0.960461	-0.158948	0.143984	-0.0213463	0.890357	-0.320325	0.0326393	0.000315446	0.615712	-4.20188e-05	0.880192	-0.000170049	0.509816	-6.93735e-05	0.908618	0.000125652	0.43223	-0.011815	0.0307871	0.295576	0.0138754	-0.0045618	0.969934
944	2850086	EPHB4	0.0183199	0.536175	0.0358408	0.226007	0.0573421	0.166963	0.0395926	0.335788	9.66507e-05	0.575769	-1.41502e-05	0.852886	-0.000105621	0.129696	0.000277556	0.0929453	-9.69509e-05	0.0265984	-0.00198882	0.184505	0.016113	0.623183	0.0188268	0.573314
945	5890139	PRNP	-0.0457148	0.293111	-0.0209259	0.632535	0.00386797	0.950197	-0.00100501	0.986721	-0.000239152	0.345224	-0.000194616	0.0819355	0.000149964	0.152395	0.000182744	0.452351	-2.18586e-05	0.735055	0.000324829	0.8831	-0.00420527	0.93056	0.0651513	0.186109
946	510240	PLXNC1	0.0050047	0.897736	-0.0189038	0.625002	0.00919486	0.865967	-0.0444409	0.406099	-6.37183e-05	0.777749	0.000135164	0.177219	-0.000178813	0.0551914	-0.000144482	0.506733	-3.98883e-05	0.487794	-0.00365566	0.0617424	0.0599178	0.162764	-0.066737	0.126698
947	1710736	FLJ33860	-0.0402975	0.252561	-0.0760573	0.0315143	-0.0132248	0.791338	-0.0656562	0.17881	0.000173191	0.398372	-1.54161e-05	0.864936	-5.77386e-05	0.49526	-0.000221076	0.26154	2.42109e-05	0.643161	-0.00137265	0.442256	-0.0383825	0.325628	0.017689	0.656987
948	4560187	ERBB4	0.00326921	0.912567	-0.0144738	0.617778	0.0217361	0.583199	0.01941	0.634107	-1.85769e-05	0.914397	1.95062e-05	0.799467	-8.53781e-05	0.206134	0.000109063	0.510089	-7.21402e-05	0.094325	-0.00144081	0.328772	0.0353893	0.276223	0.0410504	0.217193
949	3830092	HRAS	0.0445241	0.201787	-0.000363611	0.991608	0.0335465	0.485267	0.0363216	0.449351	0.000314947	0.1202	8.62589e-07	0.992331	-7.59723e-05	0.358441	-0.000102807	0.597119	-5.78724e-05	0.260384	0.00243492	0.165289	0.0341875	0.372598	-0.0341667	0.385292
950	4120110	HRAS	0.00886206	0.77036	-0.0150704	0.605657	0.048905	0.222311	0.0320443	0.434418	0.000150664	0.38867	1.22904e-06	0.987439	3.64261e-05	0.601483	0.000212726	0.20757	-1.27403e-05	0.771871	0.00397932	0.00746034	-0.0647125	0.0490425	0.0700955	0.037143
951	2710746	FGA	-0.0143667	0.632425	0.0246157	0.395173	0.0883269	0.0266108	-0.01196	0.768327	0.00021714	0.209381	9.98545e-05	0.195994	-7.35098e-05	0.28883	-0.000278643	0.0953401	-2.74646e-05	0.528375	-0.00251752	0.0877037	0.0456232	0.161307	-0.0596329	0.0733342
952	2970647	FGA	-0.0326494	0.276277	-0.0237809	0.414944	0.0460403	0.246764	0.0329517	0.420803	0.000136692	0.431917	-1.31042e-05	0.865278	-2.81314e-05	0.683438	-6.31424e-05	0.704781	4.18731e-05	0.336808	0.000130768	0.929916	-0.00781063	0.810662	0.0291819	0.384605
953	4070097	IDE	0.0319442	0.354992	-0.0461999	0.183773	-0.0433974	0.37904	-0.108558	0.0234165	4.87641e-05	0.808336	-7.58927e-05	0.393056	0.000126295	0.130242	0.000109495	0.571071	-2.80263e-05	0.584851	-0.00105415	0.54737	0.0108142	0.777848	-0.000161348	0.996703
954	4120025	C4orf13	0.0347921	0.334911	-0.00103944	0.976261	0.00427189	0.92952	-0.084679	0.0830235	7.46945e-06	0.97135	-0.000133463	0.150019	1.83705e-05	0.827286	0.000350378	0.0810692	5.98926e-05	0.2546	0.00163599	0.357519	0.0414451	0.290486	-0.0216508	0.58907
955	7160202	CCNT2	0.0135012	0.716481	0.0219062	0.556089	0.00807315	0.876876	-0.0662769	0.198168	-0.00035058	0.105545	-4.58531e-05	0.631658	0.000303349	0.000654525	0.000410031	0.0482136	0.000105246	0.0561331	-0.000796414	0.672803	-0.00894218	0.827798	0.123384	0.00348638
956	5090026	CLTCL1	0.0199728	0.572918	0.0103552	0.765122	0.0145574	0.762038	0.109767	0.0233007	-0.000354148	0.0835266	9.36666e-05	0.304971	-3.01269e-05	0.712388	1.91764e-05	0.922639	-3.39225e-05	0.51047	-0.00089953	0.608363	-0.0350931	0.365808	0.0155685	0.692734
957	5340577	CLTCL1	-0.0168535	0.547757	0.0102882	0.711525	0.0292279	0.448683	-0.0030236	0.937988	-0.000124338	0.447031	5.45014e-05	0.450869	-5.86263e-05	0.366183	1.17043e-05	0.940255	-2.80078e-05	0.49588	0.0011249	0.425282	-0.0221257	0.47447	-0.0255295	0.418966
958	1740161	HACE1	-0.0317947	0.42209	0.0635617	0.108053	0.0883479	0.110079	-0.00918121	0.86696	-0.000264702	0.251104	2.19087e-05	0.829786	4.38664e-05	0.642423	7.11186e-05	0.747642	-5.60778e-06	0.923778	0.000705132	0.725098	0.0365733	0.403092	-0.022444	0.617209
959	7320435	RCV1	-0.19812	0.00594625	-0.225546	0.00189127	-0.170693	0.098993	-0.148912	0.136402	0.000222429	0.595603	4.55156e-05	0.806517	-9.56224e-05	0.579349	-0.000653025	0.105226	4.09061e-05	0.701597	-0.00105834	0.77184	-0.083931	0.294862	0.0358101	0.657463
960	5860348	SPESP1	0.00753777	0.797224	-0.00841296	0.765674	0.0941695	0.0150467	-0.0368973	0.352025	-0.000361531	0.0323598	0.000112691	0.135301	-0.000118189	0.0790142	6.49077e-05	0.690678	1.22144e-06	0.977043	0.000167878	0.907056	-0.0404695	0.202961	-0.00821619	0.800481
961	990592	TRERF1	0.127583	0.0130329	0.11511	0.0257554	0.0307996	0.674909	0.13075	0.0659788	-0.000616035	0.0391526	0.000286795	0.0303688	3.38552e-05	0.783856	-0.000348445	0.225667	0.000219155	0.00398855	0.00114245	0.660257	0.0501419	0.379425	0.121501	0.0351218
962	3780368	KCNG3	0.0476647	0.127366	-0.0126982	0.677644	-0.0299978	0.478454	-0.0452405	0.28909	0.000142839	0.428839	-7.02248e-05	0.383476	2.05272e-05	0.77547	-2.33966e-05	0.89318	-2.36768e-06	0.958447	-0.000361874	0.815121	0.00942128	0.783089	0.0390838	0.260778
963	6270632	EPHA3	-0.00876486	0.740784	-0.0439406	0.0866764	0.0663259	0.0585104	0.0255056	0.47826	-0.000127688	0.404523	-4.29973e-05	0.528098	4.90663e-05	0.423675	-0.000104417	0.478219	1.01322e-06	0.979024	5.82285e-05	0.964493	-0.0062107	0.828808	0.0278408	0.345948
964	580382	TSSK2	-0.0162971	0.609683	-0.0204552	0.520607	0.0180982	0.684965	0.0429169	0.332509	0.000156964	0.398694	7.26025e-05	0.377726	-0.000125616	0.0925007	-9.29892e-05	0.601541	1.32688e-05	0.777759	-0.000877007	0.58603	-0.0238426	0.499718	-0.00510529	0.88685
965	870408	GLRX2	0.000264084	0.992767	0.0244358	0.387702	0.0567733	0.147497	0.0547063	0.166159	6.57691e-05	0.695447	1.73543e-05	0.816703	-8.8606e-05	0.193385	-0.000104033	0.521354	-4.63117e-05	0.275816	0.000514982	0.720373	-0.0199333	0.529656	0.0234277	0.469496
966	1410326	GLRX2	-0.102514	0.0565501	-0.172432	0.00140171	-0.237513	0.00167633	-0.17701	0.0177868	0.000613479	0.0505376	-0.000307421	0.0262583	3.44081e-05	0.789552	-0.000538291	0.072919	0.000119486	0.134323	-0.000482052	0.860186	0.0385043	0.517951	-0.0536301	0.382172
967	6760048	MT2A	-0.106677	0.302264	-0.202279	0.052465	-0.360426	0.0154587	-0.244393	0.088719	0.000648551	0.281186	-4.19391e-05	0.87506	-3.90144e-05	0.875178	-0.00166044	0.00414392	7.5388e-05	0.623089	0.00203858	0.69729	0.19164	0.0957874	0.0946508	0.414968
968	6960243	GUCY1A2	0.0258966	0.371679	0.0605707	0.0325794	0.0625851	0.110653	0.000881729	0.982218	-0.000305106	0.068819	1.76197e-05	0.813291	7.23968e-05	0.283929	-6.09245e-05	0.705962	-1.61088e-05	0.703565	-0.000208587	0.884785	0.0447695	0.157548	-0.0262587	0.416963
969	3180131	KAT3	0.144549	0.0016838	0.0506565	0.27433	0.075406	0.247599	0.111589	0.0812821	-7.76017e-05	0.772644	-0.000176556	0.135849	0.000141986	0.2001	0.000404169	0.116004	2.18551e-05	0.749351	-0.00138733	0.554143	0.0396029	0.438067	-0.0109471	0.834847
970	6220474	KAT3	-0.0909577	0.0104062	-0.0436122	0.212147	0.0549406	0.26092	-0.126691	0.00908276	0.000327097	0.111243	-0.000124906	0.1716	-0.00017559	0.0359829	0.000323456	0.102526	-7.56815e-05	0.14618	-0.0014717	0.405902	-0.00573531	0.883	0.00728121	0.854267
971	620113	SRI	-0.0513845	0.0776233	-0.0185858	0.513222	-0.0781262	0.043219	-0.0322965	0.418457	0.000148113	0.381755	-6.87193e-06	0.927057	3.57055e-05	0.592332	-0.00028894	0.07416	-1.03898e-05	0.8061	-0.000677123	0.640171	-0.0142321	0.653766	0.0118714	0.716587
972	1450072	ATP1A3	0.0128662	0.687799	0.0271217	0.39544	0.0415833	0.349401	0.049866	0.259973	-0.00025122	0.177882	0.000161255	0.0503386	-5.03498e-05	0.50882	-0.000166752	0.350474	3.34776e-05	0.47943	-0.0028972	0.0736735	0.0326934	0.354482	0.00391681	0.91414
973	460445	AMT	0.236151	0.00153851	0.21222	0.00476943	0.21055	0.0492975	0.166701	0.107677	-0.00021425	0.621695	0.000390867	0.0420133	-2.05089e-05	0.908706	0.000103976	0.803206	-0.000204296	0.0647678	-0.00394532	0.296934	-0.0483828	0.559645	0.103809	0.215575
974	2760131	BCAS2	0.0601514	0.130175	0.0564734	0.146929	-0.0548215	0.299307	-0.0671113	0.218406	-5.79168e-05	0.802303	-4.61793e-05	0.652123	0.000158459	0.0854492	-7.6109e-05	0.730345	1.77301e-05	0.759976	-0.00127707	0.520331	0.051287	0.236013	-0.0436624	0.330317
975	6480725	PRKCH	0.0106561	0.810094	0.0510408	0.252417	-0.03386	0.593947	0.045256	0.461124	-0.000173447	0.501107	5.35357e-05	0.639519	0.000269531	0.0115246	-0.00055039	0.0266219	0.000252427	0.000122909	0.00315532	0.159757	0.000723142	0.988286	0.014112	0.776859
976	6650411	SNX19	0.0748689	0.0992069	0.0620383	0.176076	0.152798	0.0189966	0.00975247	0.877487	7.83879e-05	0.767367	7.70761e-05	0.509891	-0.000130776	0.230511	0.000494253	0.0516797	-4.91509e-05	0.466187	-0.000389105	0.866243	-0.130596	0.00972396	0.0547809	0.286039
977	20762	LIMS1	-0.19809	0.0944718	-0.0913326	0.443236	-0.145815	0.389066	-0.543659	0.000924052	-0.0013073	0.0578026	-0.000338934	0.266325	8.95943e-05	0.754049	0.000884549	0.182195	9.34887e-05	0.594926	0.0108747	0.0700056	-0.0147761	0.910514	0.0091359	0.945469
978	4850670	LIMS1	0.0558657	0.0303962	0.0296847	0.239561	0.0105576	0.758055	0.0915847	0.00972444	0.000320109	0.0330928	-5.51119e-05	0.407459	2.52158e-05	0.670379	0.000101259	0.48007	-1.71508e-05	0.647969	0.000337068	0.793338	0.0177797	0.527363	0.00676299	0.815921
979	4230102	AKAP12	0.048046	0.15105	-0.000305732	0.9925	0.0421074	0.349474	0.11385	0.012264	-0.000193757	0.315476	8.55732e-06	0.920825	-4.66139e-05	0.548184	-0.000179466	0.335555	-3.10474e-05	0.52377	0.000444437	0.787928	-0.0323025	0.375844	0.0469189	0.207083
980	5390291	MGC12965	-0.00563962	0.859171	-0.020696	0.505055	0.013612	0.746939	-0.0263248	0.547006	1.88871e-05	0.91875	7.83297e-05	0.339535	-7.11018e-05	0.32271	0.000169045	0.33858	6.61373e-06	0.885835	-0.00168418	0.286609	-0.00237765	0.945416	-0.00527705	0.882433
981	2810110	TM9SF2	-0.0714929	0.124024	-0.192718	3.66235e-05	-0.108836	0.0961161	-0.136224	0.0349506	0.000341241	0.208439	-0.000165341	0.166816	5.90992e-05	0.595957	-0.000394686	0.128297	9.69227e-06	0.888295	-0.00373343	0.114697	-0.00821945	0.873213	-0.0356138	0.50212
982	1110402	CENTG1	0.093965	0.00224924	0.0186036	0.539062	0.0286661	0.497097	0.0660397	0.117418	-0.000334125	0.0603898	5.55115e-05	0.483983	8.92236e-05	0.210729	1.12091e-05	0.94791	6.56783e-05	0.143491	-0.00273706	0.0738033	0.0308099	0.362215	0.0116106	0.73461
983	3290465	MPL	-0.141043	0.419255	-0.0721908	0.682089	-0.299827	0.233016	-1.05977	1.26238e-05	-0.000836069	0.410806	-0.000315429	0.484011	0.000101012	0.808984	0.00159723	0.102215	0.000144969	0.57554	0.00402392	0.649509	-0.0479152	0.805313	-0.00671822	0.972622
984	60102	PCTK1	0.0048712	0.855214	0.00144809	0.955954	0.0213096	0.555155	0.0169339	0.644741	-0.000137199	0.376449	5.64975e-06	0.93459	2.48905e-06	0.967553	0.000224681	0.130589	2.63658e-05	0.497793	-0.00139869	0.293289	0.0272044	0.352892	0.0183225	0.539859
985	3290402	PNMT	0.0117015	0.6879	0.034665	0.221429	0.00527867	0.891926	0.0221136	0.578606	0.000176699	0.294954	-3.05108e-06	0.967595	-2.16146e-05	0.744107	5.1521e-05	0.750561	5.90944e-06	0.888586	-0.00163009	0.257928	0.0242564	0.445534	0.00716449	0.825345
986	2640753	CYP8B1	0.0151972	0.608919	0.00970322	0.738973	-0.0169719	0.674375	0.0288753	0.477563	0.000149233	0.384932	3.27272e-07	0.99659	-2.33394e-06	0.972793	-2.67224e-06	0.987124	-5.63444e-05	0.192531	0.000156111	0.915674	-0.0373765	0.251232	-0.0106131	0.748204
987	3520743	ABCA2	0.159052	0.00332974	0.103847	0.0527539	0.0493561	0.512859	0.131396	0.0767003	-0.000333331	0.287964	-4.39367e-05	0.752581	0.000270696	0.0363454	-0.000776208	0.0103387	0.000371507	3.2475e-06	0.00468808	0.0840686	-0.0435081	0.465586	0.0174353	0.773702
988	5490563	SFRS9	-0.0696561	0.00750075	-0.0558483	0.0326587	-0.00795614	0.828922	-0.0412601	0.253222	0.000240172	0.113443	-3.54612e-05	0.596682	-8.02692e-05	0.200367	-0.000126986	0.383102	-1.35481e-05	0.72606	-0.000566943	0.668082	0.011205	0.697778	0.0057901	0.844683
989	3310091	DEFA3	-0.404011	0.328026	-0.606301	0.145923	-0.841833	0.156891	0.744356	0.194948	9.29235e-05	0.969177	-0.000695239	0.514417	0.000347635	0.724703	-0.000322259	0.88912	0.000313449	0.608739	0.0182116	0.384657	-0.628551	0.171748	-0.507089	0.273197
990	1260382	NPFF	0.0489474	0.0798942	0.0455838	0.0958291	0.0487176	0.195535	0.0328127	0.391924	0.000230997	0.15442	3.41697e-05	0.635188	-2.86825e-05	0.655747	-0.000206589	0.184153	-1.3074e-05	0.74815	0.00185149	0.183165	-0.0383896	0.209254	-0.0292349	0.350064
991	2470161	NIT1	0.00983152	0.734039	0.0101034	0.720979	0.0721932	0.0602795	0.0884405	0.0258421	0.000396418	0.0185401	5.58683e-05	0.453843	-7.30507e-05	0.272494	-7.75048e-05	0.629783	-4.74777e-05	0.259859	0.00123443	0.392046	-0.0376228	0.232701	-0.0125923	0.698963
992	6400064	PPP1R3D	-0.0920163	0.0148395	-0.147438	8.93443e-05	-0.153758	0.00370545	-0.0510853	0.326658	0.000245201	0.263585	-0.000276752	0.00442099	6.10061e-05	0.498174	-0.000223635	0.289213	0.000107709	0.0535059	-0.00148645	0.434737	-0.0025639	0.950993	-0.00291884	0.945174
993	3450152	TAGAP	0.32025	0.000679486	0.51405	6.62905e-08	0.375579	0.00564692	0.2471	0.0594908	-0.000735649	0.18035	0.000396021	0.103363	-0.000577958	0.010496	0.000775113	0.141866	-0.000231771	0.0973905	-0.000171084	0.97146	0.273666	0.00909248	0.091525	0.387416
994	4250369	TAGAP	0.309011	0.000465224	0.565863	2.19533e-10	0.343816	0.00678961	0.138949	0.258022	-0.000889413	0.083896	0.000494455	0.0298091	-0.000631285	0.00290318	0.00100669	0.0416732	-0.000196757	0.133227	0.0025793	0.564947	0.211846	0.0310412	0.118305	0.234037
995	3130240	KCNS3	-0.0347247	0.224834	-0.0504097	0.0711714	0.0354089	0.351116	0.00562822	0.885685	-0.000322841	0.0521292	-1.16981e-05	0.873887	1.26252e-05	0.848733	8.25245e-05	0.603649	6.24099e-05	0.134599	-0.000606232	0.67051	0.00411615	0.894773	0.000940445	0.976674
996	7650286	TEX264	0.0390827	0.298762	0.0271469	0.469041	0.0152557	0.771048	0.00638018	0.902358	0.000343842	0.116266	4.65629e-05	0.630543	-7.94716e-05	0.37374	-5.66733e-06	0.978458	-6.95813e-05	0.21053	0.000355335	0.851667	-0.024168	0.560517	-0.0411941	0.332551
997	4890301	UCK1	-0.0312181	0.404709	-0.0112688	0.765424	-0.0699085	0.19063	0.016642	0.74943	0.000192126	0.379281	-0.000140217	0.145703	4.0956e-05	0.650494	-0.000563936	0.00711096	1.95792e-05	0.72519	0.00276472	0.147084	0.0132885	0.749441	-0.0380069	0.372092
998	3930047	KDELC1	-0.0131131	0.642691	0.00910821	0.742147	-0.048894	0.192875	-0.032945	0.397963	2.36212e-05	0.886145	-0.000142532	0.0507151	0.000202511	0.00153704	-1.6668e-05	0.915479	6.94249e-06	0.865569	0.00130454	0.354613	0.0685785	0.0265739	-0.0114287	0.719604
999	2350523	KIAA1683	0.116042	0.0107983	0.00473348	0.917047	0.02298	0.717322	0.112994	0.0735089	-0.000118394	0.655576	0.000231797	0.0480087	-0.000244997	0.0226881	0.000615843	0.0152822	1.05783e-06	0.987447	0.00086484	0.707405	-0.0235914	0.639249	0.048371	0.348025
1000	7550070	ATP5G1	-0.186084	7.74529e-05	-0.153193	0.00127708	-0.143963	0.032902	-0.187084	0.00431654	0.00075569	0.00594572	6.50224e-05	0.591441	-0.000315136	0.00560528	-0.000214478	0.415691	-0.000225599	0.00127086	-0.00275124	0.250893	-0.0307267	0.557156	-0.0480178	0.369012
1001	3190193	RPL30	-0.0331962	0.48037	0.0731924	0.122234	0.0815752	0.223733	-0.0330253	0.613092	-8.86695e-05	0.746281	0.000127933	0.290388	1.83547e-05	0.871616	0.000212991	0.418251	-0.000168748	0.0157731	0.00105534	0.658786	-0.0263215	0.614132	0.0345976	0.516507
1002	6110274	TCBA1	-0.0309801	0.358096	-0.0700401	0.0311184	-0.0509717	0.252377	-0.0602738	0.186972	-0.00028303	0.14478	-3.14056e-05	0.717669	0.000108676	0.154114	-0.000196733	0.294156	2.88412e-05	0.552385	0.00145758	0.377621	-0.063679	0.0821609	0.0431884	0.247344
1003	5550367	TLL2	-0.0561746	0.0576674	-0.0219584	0.445882	-0.000554536	0.98872	-0.0881632	0.0296588	0.000216483	0.207899	-0.00013559	0.0756767	2.12498e-05	0.750925	0.000132683	0.419929	-6.80261e-05	0.112128	-0.000936147	0.523113	0.0536029	0.0968098	0.0106342	0.747915
1004	3890066	PIG38	0.0432323	0.114744	0.0464163	0.0825194	0.089997	0.0134685	0.082397	0.0278493	3.96267e-05	0.803324	-9.54818e-06	0.892411	-5.59703e-05	0.377276	-1.06368e-05	0.944332	-1.65795e-05	0.678094	0.0012439	0.361429	-0.0505166	0.0902037	0.0497979	0.105419
1005	1260386	KCNK7	-0.0144043	0.686725	-0.0329239	0.354662	0.01096	0.826837	0.0967612	0.0495275	5.48814e-05	0.791087	-1.64542e-05	0.858239	-8.5016e-05	0.312293	-0.000137487	0.490806	-8.49449e-05	0.105939	0.000467211	0.794479	0.00119623	0.975836	-0.0213093	0.593325
1006	6330544	PPIL5	-0.00817296	0.780266	-0.0222854	0.430723	-0.0102347	0.791539	-0.00314881	0.936888	0.00029647	0.0792662	-0.000102888	0.172949	2.05492e-05	0.756507	5.17855e-05	0.75065	-1.85038e-05	0.661172	0.00164588	0.252481	0.00750745	0.813679	-0.041003	0.206952
1007	4880451	C14orf93	0.0597293	0.0635679	-0.00809029	0.80299	0.0166407	0.717916	-0.0185673	0.678139	0.000310966	0.0973119	-9.27835e-05	0.263331	-5.2547e-05	0.496106	-9.02572e-05	0.616215	-7.67628e-05	0.108072	-0.00356322	0.0292095	-0.00593889	0.868175	-0.0726095	0.0453362
1008	1980670	FLJ30596	0.0395866	0.330195	0.0213131	0.593295	-0.013716	0.799744	-0.0251412	0.652711	-0.000155596	0.511254	2.92553e-05	0.780146	0.000252286	0.00750643	-0.000199133	0.377965	9.09074e-05	0.126026	-0.0013526	0.506667	0.0474072	0.284589	-0.0133074	0.772365
1009	2350382	RAB42	-0.0160775	0.640787	0.031584	0.345946	-0.00929429	0.838695	-0.036963	0.433188	5.37561e-05	0.788109	-4.70242e-05	0.596703	2.54612e-05	0.743937	0.00010929	0.568311	6.42756e-05	0.197142	0.00112609	0.509072	-0.00975717	0.795103	-0.0371666	0.334256
1010	1090707	RNF121	0.00280757	0.942391	0.0102492	0.793109	-0.0194448	0.724793	0.028002	0.604068	-9.36115e-06	0.967035	-0.000153818	0.124034	7.61149e-05	0.413779	-0.000140482	0.517636	4.7182e-05	0.413205	0.00180798	0.359741	0.0230971	0.592245	-0.00717276	0.870483
1011	2650228	FLJ20699	0.00610459	0.932242	0.014715	0.839123	-0.0111238	0.914101	0.141688	0.155939	-0.000349097	0.404165	-0.000311216	0.092277	0.000402987	0.0199367	-0.00144721	0.000318119	0.000877876	2.22045e-16	0.0119142	0.00108541	-0.214099	0.00731788	0.132959	0.101262
1012	5560647	MGC4825	-0.0328105	0.331094	0.0414524	0.221331	0.037161	0.434258	-0.0854601	0.0682962	0.00016783	0.394057	-3.737e-05	0.667	2.15437e-05	0.790297	6.69818e-05	0.722359	-1.34616e-05	0.788211	0.00268968	0.117313	0.00799992	0.830608	0.000849457	0.982387
1013	4070524	PTGER3	0.0808865	0.209582	-0.00921764	0.886718	-0.0770652	0.401956	0.0615942	0.489798	-0.000204483	0.585181	-0.000115596	0.486687	5.35226e-05	0.729103	-0.000210785	0.55898	-2.16973e-05	0.820152	-0.00147662	0.650457	0.139215	0.0516593	-0.0421596	0.559849
1014	4810398	MGC52423	-0.025198	0.373189	0.0396605	0.156301	0.0171062	0.662579	0.0209285	0.589868	-0.000188455	0.250178	-2.27994e-06	0.97504	-3.71505e-05	0.577789	-1.1126e-05	0.943846	5.97889e-06	0.885611	-0.000931365	0.510519	0.0601595	0.0533828	-0.0171802	0.586963
1015	4880731	ATP8A2	-0.0444279	0.191266	0.00820711	0.803217	-0.0649515	0.151722	-0.0982523	0.0334329	0.000336422	0.0859989	-0.000119028	0.174276	0.000128598	0.0963644	-8.67222e-05	0.64678	-8.4014e-05	0.0871402	0.000511206	0.759822	0.0779772	0.0353134	-0.041222	0.274219
1016	3390280	KCNQ1	0.00617131	0.834828	0.0328512	0.257956	-0.0165049	0.679136	0.0146362	0.718464	0.000180553	0.293548	-1.26135e-05	0.868567	-2.19115e-05	0.749908	-1.22438e-05	0.940742	-5.34167e-06	0.901731	0.000876863	0.552807	0.00155044	0.961785	-0.0229627	0.489704
1017	1240736	XCR1	0.00248903	0.937674	0.0869463	0.00562443	0.0428187	0.330687	0.0704328	0.105904	3.42628e-06	0.985158	2.21107e-05	0.787203	8.88729e-05	0.238703	0.000289295	0.103548	-3.77702e-05	0.419345	-0.000606803	0.702735	0.0223871	0.52215	0.0144207	0.685127
1018	5260240	C10orf22	-0.114018	0.0139278	-0.0991303	0.0339359	-0.170505	0.00992777	-0.00517402	0.936025	7.05031e-05	0.794267	-0.000320507	0.00719855	0.000106868	0.339995	-8.89192e-07	0.997264	6.41085e-05	0.352389	0.0016639	0.480631	-0.0809339	0.115956	-0.00918686	0.861592
1019	6040170	DKFZp686I15217	-0.0782045	0.37447	-0.104494	0.238907	-0.0387964	0.759271	-0.32903	0.00703862	-0.00027081	0.597025	-0.0002203	0.331754	9.21101e-05	0.664253	0.000391463	0.427464	9.68868e-05	0.458326	0.0109852	0.0137754	-0.045507	0.642036	0.0575004	0.561286
1020	870592	FLJ39575	0.0655977	0.285605	0.0322274	0.601321	-0.0439556	0.615679	-0.0138173	0.871014	-0.000395857	0.267616	-0.000192511	0.224482	6.18111e-05	0.672849	0.000196015	0.568352	0.000104175	0.251499	0.0029149	0.347766	-0.00511549	0.940215	0.0596727	0.385755
1021	110603	WDR31	-0.0682053	0.0214633	0.00912165	0.749544	-0.0364455	0.352179	0.0135897	0.735051	7.15521e-05	0.675187	2.65176e-05	0.72847	4.83295e-05	0.472619	-4.00453e-05	0.808204	-4.38162e-05	0.305348	0.000252264	0.862192	0.02029	0.528704	-0.0227684	0.488209
1022	6960523	OR4L1	0.0233181	0.476742	0.00318961	0.919567	0.0654166	0.130763	0.0243383	0.583603	3.02135e-05	0.872778	9.34515e-05	0.26839	-0.000152699	0.0394085	-0.000147877	0.417281	1.45942e-05	0.757096	0.000218152	0.89195	0.00688086	0.846788	-0.0181963	0.616105
1023	2680161	CCT6B	0.0298895	0.549152	0.0751225	0.135477	0.0977741	0.169904	0.0849634	0.221228	-0.000138766	0.633627	-5.41184e-05	0.673399	0.000220139	0.0668251	0.000132093	0.635885	3.65254e-06	0.960716	2.93972e-05	0.990766	-0.0652236	0.239444	0.0481867	0.394985
1024	2030615	PLK1	0.0571783	0.10269	0.0133424	0.694019	0.0189756	0.682254	0.00841233	0.860024	-1.64713e-05	0.935184	5.86028e-05	0.516433	-2.55251e-05	0.747421	2.19899e-05	0.910144	-1.33477e-05	0.791777	0.00142632	0.408385	-0.0689896	0.0704218	0.0574622	0.140175
1025	3930403	KRTAP10-2	0.0293168	0.281882	-0.0167931	0.536345	-0.0592979	0.118853	-0.0204021	0.588848	-1.11941e-05	0.943755	-1.49771e-05	0.831064	-4.68806e-05	0.463986	0.000257755	0.089899	-5.04177e-05	0.209254	0.00154813	0.260096	-0.0182572	0.544421	-0.0404743	0.186944
1026	5860750	ORF1-FL49	-0.0781369	0.273492	-0.107817	0.133698	-0.134355	0.187863	0.0648892	0.512986	-0.000122086	0.769071	-4.75439e-05	0.795807	-0.000159	0.353857	-0.000679421	0.0886785	-4.988e-08	0.999624	0.00634511	0.0800083	0.0870292	0.272333	-0.0795901	0.323506
1027	5050408	MS4A10	-0.00099447	0.977153	-0.019553	0.562408	0.00269731	0.953246	0.0117419	0.804763	-0.000230757	0.252079	0.000129766	0.147334	-5.22708e-05	0.505791	-3.59129e-05	0.852425	-6.05807e-05	0.227623	-0.000186982	0.91332	-0.0108982	0.773437	0.0101539	0.793397
1028	160278	ANKRD17	0.018509	0.595165	0.0109597	0.753114	0.0553599	0.257571	0.005347	0.911852	-0.000142498	0.482633	1.62776e-05	0.855973	-9.66337e-05	0.243091	0.000285681	0.141764	-3.07803e-05	0.550317	-0.00149952	0.39535	-0.00979994	0.799331	-0.030476	0.4392
1029	2140575	CIAS1	0.32202	0.00189057	0.545409	1.80181e-07	0.517138	0.000518684	0.536875	0.000191329	-0.000753119	0.211808	0.000369327	0.167293	-0.000112283	0.651048	-9.18409e-05	0.874205	-0.000311539	0.0426035	-0.000983222	0.851533	0.00628429	0.956543	-0.0807125	0.487373
1030	3190520	CIAS1	0.391063	0.0146288	0.842362	1.91102e-07	0.694777	0.00259086	0.708419	0.00147635	-0.00120437	0.19688	0.000125089	0.762048	0.000163076	0.67118	0.000733267	0.413632	-0.000255708	0.281922	0.010418	0.199845	-0.0341946	0.847883	0.0336979	0.851559
1031	70709	TNP1	-0.0399818	0.1796	-0.0229106	0.424119	-0.0298419	0.44804	-0.0270662	0.50145	3.03384e-05	0.859595	-9.68956e-05	0.206172	2.68162e-05	0.69396	0.000229324	0.166292	4.8292e-05	0.262055	0.00235496	0.106622	0.0429481	0.183553	-0.014785	0.65413
1032	2120678	UBE1	-0.0172872	0.618091	-0.0293665	0.390806	-0.0605318	0.205043	-0.152361	0.00136342	-5.12671e-05	0.798608	-3.66698e-05	0.681282	2.64652e-05	0.745341	-1.44325e-05	0.940523	0.000117247	0.0212	0.000676181	0.696484	0.0782725	0.0399852	-0.0245599	0.526639
1033	6520292	UBE1	0.0281596	0.617761	0.0443352	0.4357	0.0830462	0.302671	0.00914898	0.907215	0.000221834	0.500253	3.41877e-06	0.981219	-0.000149867	0.2697	-0.000403363	0.201148	-5.61124e-05	0.503295	0.0015247	0.595244	0.259493	3.48543e-05	0.0344031	0.590643
1034	6420278	SEMA6A	0.00098403	0.981284	0.0205375	0.62209	0.134792	0.0194921	0.0789963	0.172399	-1.88558e-05	0.938456	5.80827e-05	0.590598	-4.97678e-05	0.616641	-0.00022311	0.339926	-7.13164e-05	0.24917	-0.000709449	0.737592	0.0480893	0.297281	-0.0382328	0.421508
1035	4120358	RNASEN	-0.0217613	0.682623	-0.0643403	0.231611	-0.0961046	0.208738	-0.159865	0.0311003	0.000260205	0.402255	0.000180134	0.188705	-0.000143318	0.263506	-0.000189996	0.523597	-6.53922e-05	0.408273	-0.00358736	0.185172	0.0201645	0.73338	0.0232997	0.698945
1036	3120315	RHAG	-0.0153142	0.575619	-0.00797994	0.762171	-0.0369583	0.306463	-0.0526015	0.155872	0.000160657	0.307737	2.82478e-05	0.6886	-6.29813e-05	0.308798	-8.65506e-06	0.954648	-5.51305e-05	0.161631	0.00120019	0.37067	-0.0247613	0.404894	-0.00779963	0.796839
1037	5900056	TP53	0.0260228	0.419874	0.00586223	0.850043	-0.0249078	0.558538	-0.0430847	0.322452	0.000365511	0.0490331	-0.000222449	0.00731552	-8.1261e-06	0.912787	0.000234681	0.190718	-2.86391e-05	0.539787	0.000665796	0.673492	0.0316783	0.364417	-0.0240471	0.500976
1038	5130035	HTATIP	0.0323101	0.243506	0.0439155	0.110968	0.0738976	0.0526083	0.114069	0.00293338	-0.000279217	0.0839566	6.13208e-06	0.93151	5.97344e-05	0.359828	8.79122e-05	0.568983	6.22185e-05	0.12761	0.00121695	0.384844	0.00220361	0.94245	0.0285453	0.364221
1039	1780326	LOC220686	0.0589336	0.36963	0.0577277	0.381459	0.278963	0.00265069	0.0269347	0.768808	-2.00593e-05	0.958333	5.08335e-05	0.763979	0.000114942	0.456931	-0.000422431	0.248985	4.78663e-07	0.99607	-0.000800093	0.810524	-0.0748457	0.304999	0.0583831	0.431841
1040	5690593	RBP1	0.0432538	0.121375	0.0194613	0.469631	-0.0474755	0.198078	0.0585656	0.121636	2.88993e-05	0.857345	-7.67537e-05	0.28605	9.40468e-05	0.136508	-6.75637e-05	0.663603	-6.95086e-06	0.862743	0.00021845	0.873168	-0.0103978	0.731852	0.0169641	0.5833
1041	1710095	CHRNA5	-0.0599572	0.0597731	0.00547046	0.86189	0.0543416	0.210124	-0.0333542	0.448659	-0.000163064	0.379621	-4.22966e-05	0.606573	0.000100681	0.169142	-0.000156177	0.378404	7.72872e-06	0.868133	0.000258908	0.871153	-0.0228634	0.514052	-0.0141423	0.692988
1042	7160647	FCN1	-0.0248746	0.707153	0.0862673	0.196209	0.0452855	0.634413	-0.112272	0.221666	7.30133e-05	0.849682	-9.72893e-06	0.954559	-0.000263046	0.09857	-0.000352084	0.342401	-0.000198085	0.0437168	-0.00338464	0.313016	0.105032	0.153785	-0.0976885	0.189006
1043	5360270	HAVCR1	0.0387314	0.222273	0.0154548	0.613373	0.00180796	0.9656	-0.0360875	0.401308	6.22635e-05	0.733273	0.000208363	0.0108238	-5.92776e-05	0.408933	-0.000335439	0.0574202	6.09877e-05	0.18196	-0.000841996	0.58822	-0.041701	0.226569	0.0141306	0.687631
1044	360678	TTC1	-0.0355533	0.362001	-0.0426694	0.27204	-0.0289574	0.591592	-0.0357955	0.509247	0.000160134	0.482224	-2.95527e-05	0.768807	4.85876e-05	0.591367	-2.83877e-05	0.89603	2.10701e-05	0.713359	0.00158341	0.421605	-0.0675226	0.117485	-0.022654	0.607479
1045	2450364	ACADS	0.0300106	0.363366	0.0161597	0.614389	0.0300173	0.497858	-0.0719812	0.108829	-7.50019e-05	0.693677	-3.76432e-05	0.657964	-3.45557e-05	0.648859	-0.000141296	0.442183	4.65704e-05	0.330897	0.00214584	0.18752	-0.0313141	0.384489	-0.0770849	0.0354989
1046	1110543	ADAMTS3	-0.00159362	0.954985	0.011154	0.680941	-0.00703694	0.850184	0.0619738	0.103766	2.98669e-05	0.854176	1.94968e-05	0.788179	-5.58899e-05	0.390042	0.000151723	0.333692	-5.02806e-05	0.218892	-0.000730463	0.597306	0.0273774	0.370259	0.00235144	0.940059
1047	4150189	OPA3	0.0431317	0.154204	0.0777237	0.0104545	0.0896535	0.0355732	0.0436149	0.299564	-5.92332e-05	0.737223	0.000122997	0.114471	-4.29965e-06	0.952492	0.00013506	0.424222	0.000122085	0.00649482	0.000557324	0.716864	0.0266447	0.427013	-0.0190615	0.578692
1048	7320504	OPA3	0.168698	0.000769753	0.167138	0.000899069	0.0875775	0.218041	0.231682	0.00086809	-0.00073984	0.0113142	0.000270621	0.0360871	3.70349e-05	0.757843	5.94884e-05	0.831932	8.4533e-05	0.255624	-0.00271781	0.285218	-0.0328759	0.554392	0.0387698	0.493847
1049	3930564	PDLIM2	0.019558	0.509997	0.0366866	0.20512	0.0430991	0.273707	-0.0103658	0.799235	0.000229645	0.183642	4.00104e-05	0.601366	-6.3957e-05	0.340882	-0.000157221	0.340648	-5.25112e-05	0.221923	-0.000985348	0.503747	-0.00708021	0.827074	0.0071845	0.829009
1050	650753	FASTK	-0.00930158	0.843862	0.00819009	0.862006	0.0465557	0.483308	-0.091191	0.161949	0.000231237	0.3993	-0.00010812	0.374085	-4.43072e-06	0.968548	0.000294803	0.263886	1.76421e-05	0.800289	0.00123429	0.604132	0.0441448	0.397919	-0.0412129	0.437027
1051	3870523	FASTK	0.0512841	0.128519	0.0408492	0.227041	-0.0271301	0.566718	0.0926974	0.047632	0.000216061	0.272053	0.00010707	0.217448	-2.58698e-05	0.748795	-1.48143e-05	0.937315	-8.11849e-05	0.104669	-0.00192562	0.261188	0.00932625	0.802762	-0.025228	0.511105
1052	5910168	LOC400451	0.0156057	0.693125	-0.0204349	0.60741	0.0152835	0.785641	-0.00529284	0.923401	0.000291364	0.206715	2.87567e-05	0.777703	-2.95571e-05	0.753733	-0.000231544	0.294541	-0.00013555	0.0208008	-0.00112219	0.57661	-0.0718529	0.101861	0.0130183	0.770987
1053	50632	GPIAP1	0.0929081	0.0019794	0.00458382	0.877683	0.0443656	0.284991	0.0310748	0.452211	0.00017282	0.321907	-5.58593e-05	0.469737	6.82343e-05	0.33892	0.000104561	0.532568	-3.49177e-05	0.430533	-0.00211289	0.162043	0.0385391	0.243333	-0.00896112	0.791313
1054	2320035	MKNK2	-0.179618	0.00407281	-0.0853004	0.174895	-0.107397	0.230344	-0.0107817	0.900871	8.12372e-06	0.982173	-1.97543e-05	0.902358	-0.000193722	0.199802	0.000244124	0.485745	-0.000132958	0.151871	0.00206548	0.514081	-0.0198433	0.774988	0.120362	0.0872885
1055	6420445	GPR61	-0.00934705	0.73899	0.0404856	0.141285	0.0578022	0.129772	0.00520172	0.892357	-8.34558e-05	0.607243	-6.81528e-05	0.346064	9.04415e-05	0.161595	0.000239105	0.126196	-8.50883e-05	0.0372772	0.00254514	0.0678675	-0.0579651	0.0596191	0.0454101	0.146255
1056	6760482	SFTPA1	0.0318382	0.324217	0.0249469	0.427636	0.0210218	0.629669	0.013937	0.750929	-0.000109404	0.557176	1.45452e-06	0.986032	-7.16198e-05	0.340949	0.000231721	0.197786	-1.81047e-05	0.700552	-0.000240492	0.880305	-0.0144125	0.682525	0.00500166	0.889256
1057	6900341	SORT1	-0.173721	0.0737534	-0.307192	0.00174509	-0.0918512	0.511038	-0.130393	0.334882	0.00100872	0.0749321	-0.000136543	0.585492	-0.000374005	0.109265	-0.000882977	0.10454	-0.000336752	0.0195553	-0.00102169	0.835926	-0.0694993	0.520209	-0.0398589	0.715926
1058	4260687	EDD1	0.0817611	0.0404808	0.115776	0.00405965	0.0684641	0.231586	0.0776202	0.162114	-0.000219428	0.345707	3.9163e-05	0.702942	0.000142435	0.139413	0.000383444	0.0860567	-0.000100179	0.091234	-0.00252992	0.212403	0.0598638	0.177155	0.0365336	0.419088
1059	1440452	CCDC4	-0.00825549	0.767533	-0.0369296	0.168512	0.0491964	0.181812	-0.0329534	0.381528	-0.000217631	0.175764	0.000115207	0.108377	-2.89513e-05	0.653599	-8.92829e-05	0.565207	3.6741e-05	0.364253	-0.00196934	0.149903	-5.91522e-05	0.998438	0.0358333	0.246699
1060	1940072	CCDC4	0.0335244	0.278911	-0.00198229	0.948105	0.0238479	0.573894	0.058678	0.16673	0.00014854	0.406803	-5.79082e-05	0.468261	-2.73587e-05	0.702673	0.000169857	0.325327	-0.000138547	0.00215764	0.000525973	0.732682	0.00296152	0.93063	-0.0273818	0.426972
1061	4920692	BICD2	-0.0692199	0.408228	-0.221598	0.00872118	-0.150842	0.209547	-0.182467	0.116946	-7.4307e-05	0.878924	0.000200721	0.351596	-2.24796e-06	0.991119	-0.000815402	0.0818831	-7.9561e-07	0.994895	-0.00193065	0.649658	-0.154356	0.0971477	0.0410751	0.664135
1062	5860377	BICD2	-0.0339541	0.261282	-0.0637293	0.0348992	-0.0934473	0.0274742	-0.072922	0.0813939	0.000175309	0.319157	-8.62361e-05	0.267627	0.000124524	0.0840094	3.44285e-05	0.838343	9.31077e-06	0.835105	0.00092618	0.544884	0.0456672	0.171796	-0.0121202	0.722936
1063	6770603	SIX1	-0.0371332	0.183535	-0.0415742	0.122391	-0.049796	0.176992	-0.0506388	0.180718	1.23315e-05	0.938855	-4.22115e-05	0.557362	1.81781e-05	0.773488	-1.38589e-06	0.992881	2.85242e-05	0.478	-0.00208368	0.127802	0.0897439	0.0030984	-0.0230652	0.45571
1064	270164	CKS1B	-0.178292	0.00574483	-0.171724	0.00835189	-0.147664	0.109708	-0.16831	0.0608737	0.000690359	0.0666516	-0.000113326	0.495092	-0.000119004	0.444498	-0.000187759	0.603094	-8.9505e-05	0.350829	0.00621771	0.0582344	-0.127171	0.0762317	0.0084972	0.907557
1065	5960612	C4orf13	-0.0159552	0.59215	0.0589736	0.0438656	0.00429683	0.915168	0.00618918	0.879942	-0.00017045	0.324615	4.68971e-05	0.541429	4.00183e-05	0.558033	-7.70025e-05	0.642382	2.76451e-05	0.524135	0.000519943	0.726259	-0.0206356	0.527724	-0.00301706	0.927897
1066	380687	RPS6KA2	-0.0100978	0.746488	-0.00365991	0.902907	0.0413413	0.315815	-0.0456377	0.27867	2.10375e-05	0.90685	-2.27448e-05	0.776898	4.47488e-05	0.534746	5.87997e-05	0.734885	8.21344e-06	0.856052	0.000748568	0.624607	-0.00396976	0.906483	0.0427115	0.217014
1067	5690669	RPS6KA2	0.0719009	0.13024	0.0932255	0.0515782	0.0135971	0.841186	0.0631494	0.33965	0.000325783	0.23985	8.78011e-05	0.472963	-0.000210496	0.064811	0.000366226	0.168011	-0.000166019	0.0186312	-0.0036226	0.133868	-0.0469878	0.373572	0.00975217	0.856116
1068	6420022	VPS52	0.0825534	0.0247732	0.137942	0.000166979	0.0393243	0.439255	0.0932436	0.0667429	-0.000119034	0.578559	0.000113984	0.228491	-3.04461e-06	0.97222	5.28641e-05	0.796535	-7.81764e-05	0.150347	0.00184142	0.32261	-0.0524332	0.195738	-0.000234933	0.995517
1069	3930639	FLJ43339	-0.0500104	0.582869	-0.177984	0.0526498	-0.153593	0.240932	-0.398639	0.00162156	-9.43696e-05	0.85869	5.04463e-05	0.829893	-3.76346e-06	0.986272	-0.000595606	0.24273	9.97339e-05	0.460358	0.00719481	0.119115	-0.0229649	0.820661	0.0387035	0.705209
1070	4540706	AGRP	0.0243941	0.412667	0.010548	0.719525	0.0399818	0.324654	0.002884	0.944044	2.09813e-05	0.903616	6.47902e-05	0.398786	-5.35579e-05	0.434689	0.00020225	0.222612	-5.3517e-05	0.218692	0.000897309	0.547069	-0.0382557	0.242694	-0.00162601	0.961183
1071	60468	CDK9	-0.0316602	0.344748	-0.00794402	0.81328	-0.06048	0.202996	0.035163	0.448805	1.46786e-06	0.993995	3.92024e-05	0.649269	3.00528e-06	0.970299	-0.000588226	0.00169178	0.00018138	0.000265227	0.00030272	0.8586	0.00727347	0.844694	0.00716576	0.850134
1072	6110059	FKSG14	0.00904146	0.935653	-0.0303884	0.787624	-0.0684695	0.669948	0.112564	0.468651	-0.000743753	0.253736	0.000298942	0.300018	0.00029123	0.280946	0.000361424	0.564378	-0.000186605	0.261635	-0.000194457	0.972671	-0.0625309	0.615303	0.2028	0.10789
1073	1660309	CCNA1	-0.0905237	0.419964	-0.0818679	0.469353	-0.368911	0.0220409	-0.265438	0.0885806	-0.000744161	0.254799	0.000275216	0.341265	-0.000384433	0.154687	-0.000282205	0.653338	-1.83309e-05	0.912387	-0.0127534	0.0250731	0.34942	0.00510763	-0.125195	0.321919
1074	1990678	SLC15A1	0.0117473	0.675067	-0.0366575	0.186513	-0.0239	0.533579	-0.0280929	0.469064	0.00019041	0.24387	-6.74951e-05	0.35025	3.85402e-05	0.551207	-0.000157122	0.313993	-1.28535e-05	0.754173	0.00124255	0.377493	-0.027638	0.370828	0.0244702	0.438023
1075	4260360	MXI1	-0.0177955	0.590745	0.0026514	0.935139	0.0353641	0.432554	-0.104637	0.0211015	-3.10307e-05	0.871615	0.000128498	0.131256	6.39424e-06	0.934595	-0.000242861	0.187716	6.58154e-05	0.175609	-0.00059822	0.717922	0.0652334	0.0717956	-0.105936	0.00440592
1076	4490719	TAF10	-0.0140459	0.67481	0.00591302	0.860707	0.00374745	0.93696	-0.0311228	0.503807	0.000402963	0.039173	-0.000118185	0.169952	-6.76808e-05	0.401005	-0.000324656	0.0826034	-5.8594e-05	0.238947	0.00195771	0.251149	0.00359912	0.922803	-0.0629304	0.0995763
1077	1690475	MCM7	0.126733	0.00594218	0.22005	1.59395e-06	0.164794	0.0110156	0.0998903	0.114666	-0.000449638	0.0922717	6.82535e-05	0.564782	0.000134585	0.223802	0.000885521	0.000587719	8.53354e-05	0.209901	-0.00158425	0.49413	0.0677509	0.182854	-0.0630254	0.222471
1078	6290239	MCM7	0.169563	0.0025237	0.164311	0.00366816	0.148554	0.0654211	0.165238	0.0337987	-0.000369827	0.257429	-1.63385e-05	0.910135	0.00030657	0.0230989	0.000667466	0.0337098	3.62103e-05	0.663581	-0.00124454	0.661644	-0.0365122	0.558567	0.0351772	0.576757
1079	650767	PPP2R5A	-0.0786276	0.0425702	-0.13048	0.000807664	-0.0327664	0.548717	-0.0832835	0.122055	0.000385514	0.0883362	2.92592e-05	0.769283	4.43844e-05	0.633389	-0.00105901	1.00393e-06	7.34848e-05	0.201754	0.000811885	0.680738	-0.0232694	0.588118	0.0249598	0.572318
1080	4060577	FRMPD1	-0.0225266	0.395105	-0.0032967	0.900651	1.00179e-05	0.999785	0.00807813	0.82521	-0.000307619	0.0453494	-5.861e-05	0.391145	3.78102e-05	0.543924	0.000154766	0.295683	-7.45102e-05	0.0558477	0.00274203	0.0393356	-0.0407528	0.164407	0.0589563	0.0462993
1081	3870670	ATM	-0.0227466	0.54689	0.00188936	0.959828	-0.0166749	0.748628	-0.0310807	0.553036	-0.000280664	0.20277	0.0001471	0.130766	5.81793e-05	0.505799	0.00010952	0.60253	4.85828e-05	0.380777	-0.00205365	0.280363	-0.00678629	0.870693	0.0512778	0.228595
1082	4260392	ATM	0.054859	0.399322	0.0498531	0.447855	-0.0336463	0.716868	-0.147297	0.104134	0.000360543	0.342736	0.000215435	0.198171	-2.96114e-06	0.98496	0.000458533	0.207668	-6.52503e-05	0.500312	-0.00651464	0.0496493	0.0454884	0.529351	0.0411528	0.579217
1083	3780148	ACCN5	0.0110894	0.70633	0.0517083	0.07248	0.0404772	0.300323	-0.00287998	0.943354	-1.63281e-05	0.924203	5.64441e-05	0.457376	-5.17268e-06	0.938067	9.54888e-05	0.559318	-2.82232e-05	0.508423	-0.00209602	0.152658	0.0238154	0.459232	-0.0384108	0.245812
1084	3460575	LOC148898	-0.0418081	0.192911	-0.0408653	0.1868	-0.0521661	0.218801	-0.0143675	0.741282	-0.000111719	0.545728	3.22048e-06	0.96895	-7.923e-05	0.275369	0.000188084	0.292373	-2.61668e-05	0.571458	-0.00175177	0.265721	0.0218657	0.530929	0.0456215	0.199603
1085	1710703	PCDHGA4	0.00972954	0.731217	-0.0164502	0.552074	-0.0859806	0.0248984	-0.0336287	0.384107	0.000178853	0.274135	2.77311e-05	0.703951	1.90453e-05	0.770679	-0.000184904	0.24142	1.00804e-05	0.806677	0.00194278	0.16583	-0.011932	0.700209	0.0128109	0.684149
1086	5290204	PCDHGA4	0.000863739	0.978011	-0.0100073	0.740411	-0.0737178	0.0749563	-0.0526125	0.215313	-4.98935e-05	0.782143	8.68872e-06	0.914305	-3.44244e-05	0.627238	3.06882e-05	0.860268	-6.82403e-05	0.130441	-0.000489001	0.750172	0.0584905	0.0858766	-0.0433523	0.21161
1087	5670435	P2RX1	-0.018006	0.793614	0.040739	0.556373	0.00386975	0.968723	0.0150046	0.874929	0.000344281	0.389671	-0.000172899	0.329509	-0.000199794	0.228905	-0.000202191	0.599898	-0.000161193	0.114405	0.000321338	0.926529	0.0434022	0.570226	-0.0637861	0.40991
1088	6220376	ELOVL6	0.0534648	0.124343	0.0439024	0.207759	0.0525483	0.28325	0.0472843	0.328744	-0.00031768	0.117701	-7.83476e-05	0.382258	0.000165226	0.0434301	-0.000195846	0.312974	0.000194182	0.000158263	0.00292126	0.0975104	-0.0384834	0.318585	-0.00162833	0.96691
1089	870424	RPL31	-0.0540084	0.16368	0.0478111	0.219689	0.00730275	0.89383	-0.0819191	0.12846	0.000176965	0.434093	5.78759e-05	0.561878	1.61899e-05	0.861702	0.000304929	0.159104	-0.000145263	0.0116058	0.000158368	0.936016	-0.0219097	0.610278	-0.0150603	0.732999
1090	130128	VEPH1	-0.0150649	0.609181	-0.037683	0.184594	-0.0716382	0.0657197	-0.0883415	0.026925	4.96552e-05	0.769771	-0.000152428	0.0446817	6.83191e-05	0.305393	6.62367e-05	0.686169	4.67072e-05	0.270966	-0.000134274	0.925918	0.0412211	0.197998	-0.036923	0.257877
1091	1110347	PYDC1	-0.00597451	0.810221	0.0068533	0.777095	-0.0664057	0.0440105	-0.0353198	0.299875	0.000172346	0.232885	-5.19778e-05	0.417932	4.05953e-05	0.470729	-0.000217183	0.116343	-8.49537e-06	0.813402	-0.000701572	0.569045	0.0153949	0.570464	-0.00527151	0.849636
1092	4210524	VPS16	-0.0185079	0.651195	-0.0396408	0.334944	-0.0512481	0.376285	-0.0861741	0.12913	4.49688e-05	0.850451	-0.000117108	0.2661	9.12636e-05	0.354244	8.05905e-05	0.724652	9.88802e-05	0.103764	0.00292716	0.159159	0.0329968	0.466993	-0.00707183	0.879048
1093	3370605	SIPA1L2	-0.0535733	0.483858	-0.151107	0.0504135	-0.173013	0.114663	-0.0726518	0.495975	-9.64351e-05	0.829114	-0.000148541	0.451325	-5.33081e-05	0.770522	-0.00060273	0.158791	4.45573e-05	0.694867	-0.00887896	0.0226347	0.173997	0.0410076	-0.156182	0.0707097
1094	4810736	PECR	-0.0539995	0.340188	-0.0988898	0.0807122	-0.0594917	0.458807	-0.076375	0.327984	0.000248597	0.449386	0.000161813	0.267073	-0.00025443	0.0615213	-2.26489e-05	0.942999	-6.19096e-06	0.941083	2.74545e-05	0.99233	-0.0430196	0.492538	0.0547768	0.388582
1095	4560440	WDTC1	0.0305487	0.369935	0.0202829	0.544977	0.000178674	0.996885	0.11974	0.0105351	0.000188595	0.341479	3.43546e-05	0.695486	-0.000150414	0.058526	-3.90763e-05	0.836621	-4.42037e-05	0.375784	-0.00126906	0.45736	-0.000796155	0.982933	-0.0357036	0.35357
1096	940341	HORMAD2	0.0286626	0.290563	-0.0274157	0.294156	0.00613631	0.863993	-0.143123	9.76724e-05	6.58291e-06	0.966371	-3.23837e-05	0.642975	4.7932e-05	0.435302	-0.000256074	0.0896155	5.7956e-05	0.137955	-0.0014079	0.28942	0.0291172	0.322988	-0.0328934	0.273447
1097	2650070	MRPL37	0.0332988	0.453217	-0.030948	0.489319	0.0764498	0.22667	0.0611568	0.322014	0.000263773	0.308486	-8.83957e-05	0.438846	3.55104e-05	0.740431	-6.18602e-05	0.803208	-0.000129433	0.0499268	0.0043281	0.0556015	-0.120533	0.0144877	0.0211556	0.675566
1098	5050286	SMARCA3	0.00216159	0.946072	-0.0523611	0.0970848	0.00656546	0.880355	0.0198603	0.651274	-0.000148052	0.425341	-1.93691e-05	0.813835	-2.86445e-05	0.703466	0.000139586	0.433003	5.44789e-05	0.246201	-0.000993828	0.535559	-0.0326162	0.352011	0.0364198	0.312175
1099	7380576	SMARCA3	0.0462898	0.359452	0.00188609	0.970485	-0.147183	0.0419148	-0.0543511	0.439587	0.000249143	0.39781	-8.92337e-05	0.492582	0.000140989	0.245991	-6.47533e-05	0.818731	8.35488e-05	0.265584	-0.00208919	0.416152	0.0083545	0.881737	-0.0587488	0.304284
1100	5570161	NOC3L	0.102872	0.00328028	0.0868481	0.0125042	0.0292871	0.546941	0.0216448	0.654188	-6.25283e-05	0.75857	-0.000176855	0.0497401	0.000142763	0.082938	0.000983829	4.65366e-07	-6.22317e-05	0.227013	-0.000886539	0.614612	0.0511715	0.18498	0.00665079	0.865708
1101	7160059	C19orf28	-0.071558	0.11298	-0.102762	0.0222418	-0.155906	0.0139358	-0.0586117	0.345566	0.000212273	0.417677	-0.000133355	0.251103	-0.000174244	0.106804	-0.000423471	0.0933292	-0.000121446	0.0685861	-0.00148802	0.51254	0.0614645	0.217562	-0.0282323	0.577431
1102	2260168	C8orf30A	-0.0152052	0.749046	-0.122819	0.00971267	-0.0700967	0.298176	-0.0827522	0.206295	0.00047905	0.0824224	6.00179e-06	0.960872	-0.000153659	0.180025	-0.000364693	0.170366	7.16168e-06	0.918919	-0.00186727	0.435955	0.0406337	0.439744	-0.0588049	0.270595
1103	620035	MME	-0.0272816	0.358057	0.026081	0.375084	-0.0113012	0.780877	-0.0589911	0.151533	0.0001777	0.304889	2.42735e-05	0.751142	3.84705e-05	0.574029	-2.65125e-05	0.872543	5.16637e-05	0.234753	-0.000672827	0.652104	0.0415574	0.204035	-0.0360977	0.28077
1104	1260100	MFGE8	0.14713	0.063205	0.219921	0.00590378	0.219944	0.0536111	0.16361	0.136786	0.000138499	0.763829	0.000424547	0.0375626	-0.000357602	0.0606361	0.000351868	0.427709	-0.000263825	0.0247856	-0.0080163	0.0458191	0.0777315	0.37754	-0.0274728	0.757765
1105	1710278	COL4A6	-0.0140049	0.626756	-0.0273629	0.330317	-0.0436193	0.253717	-0.0265268	0.501892	8.78995e-05	0.599784	-0.000106359	0.152064	0.000114732	0.0806779	-0.000125583	0.43265	-2.98016e-05	0.476008	0.000768542	0.591429	0.0222074	0.479456	-0.0230022	0.476707
1106	5670349	COL4A6	0.000906011	0.976474	0.0249407	0.403942	-0.0042526	0.916809	0.0169142	0.687528	0.000163669	0.358781	3.48217e-05	0.660325	-9.94356e-05	0.152699	-8.67504e-05	0.611513	-1.13426e-05	0.798561	-0.000405235	0.789894	0.00577302	0.863179	0.00983497	0.774484
1107	7330601	LOC493829	0.0036873	0.894573	-0.00686123	0.80006	0.0517111	0.160918	0.0505554	0.184876	-9.92645e-05	0.53919	5.97964e-05	0.404754	-5.99857e-05	0.340589	0.000208146	0.178391	5.0618e-05	0.208701	0.00106706	0.438987	-0.0472563	0.119517	0.0190274	0.540912
1108	3140546	CAST	0.00241599	0.932797	0.0501293	0.0756633	0.0498768	0.203608	0.0422902	0.282109	-4.29914e-05	0.79575	-3.75874e-05	0.610502	-3.77757e-05	0.572159	0.000305963	0.0554161	-4.48077e-07	0.991478	-0.00142902	0.317814	0.00442044	0.888241	-0.0148326	0.643498
1109	1400703	CEECAM1	0.0213867	0.607297	-0.00153271	0.97019	0.0024029	0.966368	-0.0145597	0.798793	7.40033e-05	0.759139	-5.31797e-05	0.619622	4.91778e-05	0.6142	-0.000243492	0.293873	0.000217623	0.00036292	0.00338924	0.103354	-0.0360565	0.429827	-0.023268	0.617883
1110	5720719	SOS1	-0.0238619	0.64268	0.0216139	0.676245	-0.0396344	0.587879	-0.0891601	0.212045	0.000248468	0.40721	0.000167313	0.206056	-7.95645e-05	0.520686	-0.000113334	0.693476	-3.22652e-05	0.672811	0.00354615	0.17498	-0.00508584	0.928993	0.0254418	0.662892
1111	2060239	LOC196752	0.155668	0.0358821	0.0642385	0.390756	0.177448	0.0958458	0.221218	0.0319043	-0.00105817	0.01434	0.000232242	0.224159	0.000243184	0.173869	-5.57418e-05	0.893252	0.000133093	0.227054	0.00192905	0.608399	-0.0695166	0.399325	0.112438	0.179199
1112	6450286	FLJ38663	-0.028392	0.580823	-0.0291326	0.574235	-0.0383718	0.603464	-0.0443998	0.534079	0.000367068	0.220134	0.000117931	0.373246	2.88689e-05	0.81581	0.000354589	0.218151	-0.000193085	0.0114304	-0.00305543	0.241307	0.0437435	0.444128	-0.000988532	0.986389
1113	4490681	LOC400696	-0.0194513	0.489041	-0.00409104	0.88063	-0.000721355	0.984682	-0.0644423	0.0911973	0.000115236	0.477086	-0.000118072	0.102752	9.32444e-05	0.149668	-8.60731e-05	0.58235	-3.52566e-05	0.387334	0.00159872	0.24816	0.0135881	0.657054	-0.029295	0.34786
1114	4010451	OR8D1	0.00834857	0.778452	0.0286988	0.314991	0.0238469	0.542787	0.0368903	0.357915	-0.000304694	0.0744966	0.000108555	0.155181	-2.50144e-05	0.711831	0.000311327	0.0592238	5.89282e-05	0.169091	0.00042384	0.770637	-0.00689823	0.830281	-0.0139125	0.672089
1115	2680487	UNC5A	-0.00218723	0.947233	0.00836074	0.792963	0.0546026	0.211048	-0.0100785	0.821924	-0.000293096	0.123479	6.23524e-05	0.464016	-0.000137046	0.066775	0.000126713	0.49069	1.27045e-05	0.789482	-0.000796486	0.622876	-0.0217091	0.545526	-0.0502715	0.169591
1116	4010608	CC2D1B	0.0609322	0.182833	0.0826912	0.0712135	0.13707	0.0336977	0.0731157	0.248386	-2.13169e-05	0.93619	0.000116912	0.320464	-5.68763e-05	0.604655	6.19281e-05	0.808564	-2.64918e-05	0.696132	-0.00016558	0.943061	0.0098705	0.845438	-0.0101615	0.84445
1117	610689	ASPH	-0.0117245	0.892054	0.0563255	0.517931	0.0787205	0.523496	0.190185	0.113555	-0.000251903	0.61713	-0.000121695	0.584082	0.000300355	0.149219	-0.000109024	0.82149	-2.98611e-05	0.816109	-0.00294618	0.50269	0.0179193	0.851902	0.087106	0.374256
1118	540364	FLJ25422	0.0273723	0.37242	0.0861466	0.0035924	0.0637169	0.116056	0.0812298	0.0506769	-4.58485e-05	0.795475	0.00010707	0.175307	-1.28888e-05	0.853902	0.000150208	0.378752	-1.74081e-05	0.694585	-0.000730453	0.627629	-0.00247026	0.940871	0.00911632	0.788804
1119	3940563	SOX21	0.0252438	0.369554	0.00490755	0.858433	0.0236127	0.527291	0.0864882	0.0255605	-0.000104838	0.522711	0.000102808	0.156736	-8.06395e-05	0.205086	9.66265e-05	0.536528	9.32639e-05	0.0222352	-0.00144514	0.302161	-0.0155974	0.612051	0.000255656	0.993551
1120	1030609	MANEAL	-0.0166429	0.598022	-0.00335712	0.913965	0.0133098	0.755353	0.00240099	0.956039	-5.93564e-05	0.746798	-8.06009e-05	0.322127	7.92489e-05	0.273049	-0.000126563	0.471221	5.18014e-05	0.260486	0.000370632	0.814342	-0.019179	0.580064	-0.0171866	0.627952
1121	2850450	MANEAL	0.0173768	0.574084	0.00840348	0.780054	0.011548	0.78106	0.0166417	0.692789	4.52474e-05	0.799761	9.50432e-05	0.233004	-3.60528e-05	0.610132	-0.00044356	0.0100053	2.5443e-05	0.570065	-0.00221	0.147519	0.00919949	0.785358	-0.0602335	0.0793175
1122	6560129	ADAM11	-0.0366437	0.19134	0.000308838	0.990992	-0.0457192	0.226654	-0.00840135	0.82608	4.38299e-06	0.978426	-6.66468e-05	0.355991	-1.40934e-05	0.828129	-4.76206e-06	0.975678	-8.33981e-05	0.0411325	-0.00198296	0.153384	0.0395989	0.196038	0.00270619	0.930956
1123	4150324	C6orf151	-0.0490221	0.174545	0.04021	0.26046	-0.0112065	0.821951	0.00746807	0.880571	-2.48907e-05	0.905499	6.18994e-05	0.505593	7.35926e-05	0.385519	-0.000189648	0.346264	8.3756e-05	0.114397	-0.000467551	0.796284	0.0121945	0.758889	-0.115353	0.0044235
1124	2260121	PSORS1C2	-0.0283721	0.348918	-0.00218682	0.941767	-0.00235564	0.954973	0.01869	0.653851	0.000164282	0.349946	-3.06491e-05	0.694566	-6.66667e-07	0.992476	-2.0926e-06	0.990116	-5.60546e-05	0.206789	0.00136936	0.366343	-0.0121146	0.716272	-0.0313711	0.354775
1125	2900010	ARID1A	-0.0184623	0.465441	-0.0241821	0.325899	-0.0780508	0.0198997	0.0372387	0.282417	5.93013e-06	0.967799	-2.11223e-06	0.974172	3.97196e-05	0.487576	4.08906e-07	0.99768	-2.34645e-05	0.521385	7.83239e-05	0.950148	0.00187647	0.945772	0.0146176	0.605162
1126	1010402	MGEA5	0.115078	0.0309698	0.0406778	0.448877	0.0794983	0.297987	0.0565971	0.444353	-4.22505e-05	0.891751	0.000167794	0.221704	8.07157e-05	0.530755	0.000206255	0.489733	-9.10734e-05	0.250223	-0.000686319	0.799706	-0.00486706	0.934523	0.0684664	0.255328
1127	270646	DCX	0.0244805	0.426559	0.0288426	0.329506	0.035089	0.387767	-0.00434793	0.91663	0.000105594	0.551288	-2.46892e-05	0.755035	2.22786e-06	0.974961	-5.55377e-05	0.745578	1.91321e-06	0.965795	-0.00139079	0.35637	-0.0266507	0.423757	-0.0107776	0.751984
1128	3400753	STAR	-0.0153338	0.596027	0.0427675	0.126635	0.0176673	0.644291	0.0190623	0.628357	8.1919e-05	0.62418	3.36965e-05	0.651324	-1.74428e-05	0.7898	-0.000155787	0.332815	-4.12561e-05	0.32294	-0.00218557	0.124898	0.0570507	0.0699495	-0.0430577	0.18059
1129	2940722	CDK5RAP3	0.195755	0.0140177	0.181944	0.0237719	0.145782	0.203291	0.0316038	0.77559	-0.000197016	0.671472	6.29089e-05	0.759178	-2.31072e-05	0.904226	0.000787782	0.0775201	-0.000101825	0.389558	0.00348083	0.389595	-0.00891481	0.919862	0.0769441	0.392547
1130	580039	FLJ16360	0.000618739	0.97989	0.0025115	0.916438	-0.025935	0.425792	0.00692851	0.836701	0.000185121	0.194373	-3.7908e-05	0.549066	-1.67067e-06	0.976285	-0.00022239	0.103042	3.26152e-05	0.360462	0.00198249	0.104069	-0.0133659	0.617132	-0.0144548	0.59959
1131	1940035	FADD	-0.0937052	0.0744883	-0.170242	0.00133186	-0.193275	0.0103691	-0.048952	0.504177	0.000427143	0.163874	-0.00019449	0.151062	0.000160972	0.198985	-0.000551715	0.0602965	8.06367e-05	0.301094	-0.000527044	0.843793	-0.0247621	0.67199	0.0122208	0.836637
1132	4860598	F25965	0.0378757	0.262558	-0.00976749	0.768193	-0.00487669	0.915684	0.017546	0.70415	0.000256656	0.188932	-5.19528e-05	0.550916	-3.66098e-05	0.640324	-0.000351481	0.0622193	4.5988e-05	0.350759	0.00292624	0.0811799	0.0110347	0.765894	-0.0235301	0.531732
1133	1570435	ZHX1	-0.163098	1.77356e-06	-0.170721	4.77493e-07	-0.139776	0.00329952	-0.139271	0.00301216	0.000396301	0.045428	-0.000162981	0.0634068	0.000131108	0.108214	-2.83087e-05	0.88196	6.05688e-05	0.229618	0.00178614	0.298336	-0.0466705	0.21457	-0.0409175	0.286732
1134	10021	CDC27	0.003556	0.933423	0.0129587	0.761514	0.118585	0.0476156	0.0288979	0.62456	-0.000217378	0.38103	3.9951e-05	0.715237	-7.4016e-05	0.468852	-6.76627e-05	0.775924	-3.38672e-05	0.591853	-0.000630699	0.77062	-0.0220151	0.640367	0.0498081	0.303997
1135	520161	TPT1	-0.0124015	0.841559	0.116956	0.0612816	0.230447	0.00898597	0.0305317	0.723353	-0.000321628	0.3741	0.000294176	0.0652546	-8.31101e-05	0.578593	-9.7306e-06	0.977617	-0.000180835	0.0498991	0.000651408	0.836592	-0.0581271	0.398604	0.0645754	0.360411
1136	2140025	AFG3L1	0.183789	2.52822e-05	0.0878824	0.0457736	0.0756457	0.223894	0.0902776	0.136824	-0.00024047	0.344736	-3.43052e-07	0.997561	0.000187112	0.0758934	0.000252364	0.301035	8.37921e-06	0.897247	-0.00255529	0.250051	-0.0205845	0.670956	-0.00062008	0.990036
1137	5220301	AFG3L1	0.204303	7.9078e-05	0.0443677	0.391705	0.106327	0.148281	0.0222173	0.755629	-0.000301972	0.314924	0.000219408	0.0996746	0.000168782	0.176113	-0.000130338	0.652768	4.96573e-05	0.517023	0.00115154	0.659363	-0.0684223	0.232623	0.0638643	0.271913
1138	2340026	C4orf13	0.0331955	0.521381	0.0256735	0.621936	-0.068783	0.352838	-0.105188	0.142582	-9.02382e-05	0.764444	1.29059e-05	0.922887	-3.67315e-05	0.768333	0.000295592	0.307654	0.00010599	0.167577	0.000553753	0.832771	0.0167957	0.770132	0.0222117	0.703138
1139	6130364	CALB2	-0.0373147	0.176236	-0.0231534	0.388836	-0.0221078	0.545601	-0.0882599	0.0195088	0.000394849	0.0137593	-0.000108531	0.127134	2.98506e-05	0.633873	-0.000247439	0.106643	9.36885e-06	0.814706	0.00192603	0.159149	0.0391101	0.193508	-0.0238863	0.439191
1140	7550653	MGC52057	-0.00351457	0.894253	-0.0152311	0.56244	-0.0014146	0.969476	0.0655533	0.0721933	-2.13602e-05	0.889202	-2.19988e-05	0.747069	-6.00415e-05	0.332897	0.000337497	0.0222925	-5.56175e-05	0.152104	-0.000684345	0.605736	-0.0407161	0.163487	0.0173902	0.555727
1141	1170092	TBK1	0.147306	0.00971774	0.242571	2.32338e-05	0.0765155	0.349394	0.160093	0.0423777	-0.000927907	0.00508948	-0.000219665	0.134457	0.000350164	0.010977	0.000126775	0.691246	0.000240418	0.00445206	0.00385298	0.18149	-0.0438407	0.488427	-0.0195141	0.760736
1142	5910452	GCM2	-0.0277061	0.368214	-0.0702287	0.0195613	0.0676767	0.0978025	-0.0117555	0.7803	-0.000205249	0.251389	0.000106092	0.181075	1.18778e-05	0.867673	-0.000303152	0.0763918	1.43875e-05	0.748679	0.000949536	0.536023	-0.0410884	0.219938	0.0392075	0.257621
1143	6060730	GALNACT-2	0.301659	4.19562e-06	0.354192	8.61636e-08	0.319555	0.00066256	0.256612	0.00489218	-0.00082972	0.0299695	0.000157973	0.34897	4.33376e-06	0.978167	0.000778766	0.0337703	-4.33028e-05	0.656806	0.000220758	0.947208	-0.0135266	0.852694	0.120516	0.105055
1144	70497	RGS3	0.0790085	0.0140338	0.0464336	0.138965	0.0376821	0.38534	0.0141579	0.746964	6.32412e-05	0.733402	0.000100494	0.225496	-0.00010902	0.13939	-0.00026378	0.141059	-2.69125e-05	0.564216	-0.00103485	0.515186	0.038498	0.273912	-0.0726235	0.0421217
1145	3830343	TMEM16H	0.0596519	0.198899	0.0951334	0.0394332	-0.0230569	0.721869	0.00146898	0.981672	-0.000109212	0.68544	0.000191191	0.109377	0.000156824	0.158107	-0.000552023	0.0332671	6.57941e-05	0.337758	3.10151e-05	0.989424	-0.0351846	0.49178	0.0335552	0.521439
1146	1090500	KRT1	-0.0682975	0.279034	0.0178127	0.777908	0.000930779	0.991681	0.0180339	0.836465	-0.000179313	0.624886	3.09138e-05	0.84935	0.000154341	0.301216	-0.000215246	0.541561	0.000203533	0.0288353	-0.00011014	0.972395	0.0812553	0.245364	-0.122804	0.0821804
1147	1110148	DBF4	-0.00452057	0.876304	-0.0283627	0.309645	-0.00407666	0.9153	0.00585898	0.88121	0.000121123	0.468738	-1.67818e-05	0.822177	2.53422e-05	0.704161	2.2487e-05	0.889239	9.75675e-05	0.0202908	-0.000277348	0.845413	0.0205744	0.512956	-0.012122	0.7063
1148	1010201	ZNF622	-0.101863	0.00212259	-0.0406989	0.223503	-0.0238935	0.613875	-0.0752573	0.102594	-8.51795e-05	0.659492	-6.86095e-06	0.93588	0.000182429	0.0227092	-0.000346239	0.0619137	0.000146855	0.0028874	0.000208974	0.901393	0.0267932	0.466868	-0.00709039	0.850605
1149	4200196	NPPC	0.0292871	0.286427	-0.00106523	0.968496	0.0109023	0.771229	0.00960332	0.798473	-0.000306961	0.0532666	1.99286e-05	0.778466	3.35804e-05	0.596651	0.000244035	0.111185	-4.35587e-05	0.27648	-0.00137351	0.314104	-0.0386242	0.200259	0.0568193	0.0630857
1150	6960376	TICAM1	0.300046	0.00014641	0.521323	5.92548e-11	0.301795	0.00783941	0.311565	0.00450706	-0.000738877	0.108061	-9.82982e-05	0.62972	9.59294e-06	0.959572	0.000977929	0.0270158	-6.7046e-05	0.567029	0.00658428	0.100107	-0.110655	0.208094	-0.0181686	0.837526
1151	2690348	TFAP2C	0.0369231	0.23213	0.018244	0.538633	0.0703649	0.0843416	0.0183899	0.658911	-0.000345399	0.052131	7.72104e-05	0.330779	4.05065e-05	0.570609	-5.49901e-05	0.748856	6.81709e-05	0.128217	0.00126302	0.403936	-0.0222008	0.506478	0.0130405	0.703198
1152	3840066	PRMT2	0.0711265	0.30449	0.0421619	0.546388	0.0871129	0.380593	0.0281302	0.770437	0.000672266	0.0960031	0.000187616	0.292993	-0.000190113	0.253304	0.000315316	0.41582	-0.00022699	0.0273293	6.6904e-05	0.984837	-0.107188	0.164066	0.0635451	0.416521
1153	7560072	PRMT2	0.00895567	0.913582	-0.0290637	0.72697	0.00760808	0.948861	0.0544205	0.634918	0.000391891	0.414713	3.25326e-06	0.98779	7.17205e-05	0.718471	0.000253039	0.58407	-0.000201898	0.0993988	0.00139378	0.739097	-0.110753	0.227398	0.0191007	0.837277
1154	5860113	CASP6	0.00918888	0.821787	-0.0665507	0.099683	-0.0692985	0.21253	-0.0235111	0.676996	0.000115719	0.62689	8.96454e-05	0.393814	-5.32273e-05	0.575492	-6.38316e-05	0.778621	4.32201e-05	0.470619	-1.64147e-05	0.993631	0.0398139	0.374839	0.00457131	0.921308
1155	1400504	TRIM37	0.0435396	0.200396	0.0204666	0.535217	-0.0193436	0.672085	0.0323691	0.482774	3.84055e-05	0.84473	-7.29312e-05	0.404113	1.98485e-05	0.80245	0.000189647	0.316573	3.21399e-05	0.516711	0.00113429	0.499174	0.00739904	0.84157	-0.00294446	0.937908
1156	1850725	TRIM37	0.0367203	0.301807	0.0141761	0.685436	0.0553793	0.256858	0.00872818	0.857722	0.00010232	0.618866	-0.000141254	0.123116	-3.56946e-05	0.667521	0.000194012	0.328124	3.18251e-05	0.540697	0.000227888	0.897615	0.0186344	0.633287	0.0109558	0.782261
1157	4570360	KLK15	-0.0111887	0.710241	-0.0168368	0.564587	0.0377867	0.34344	-0.0337827	0.410253	-0.000194839	0.263971	1.36647e-06	0.985941	5.26873e-05	0.44641	6.33424e-05	0.705101	2.21217e-05	0.612947	-0.000941046	0.52752	-0.000687605	0.983233	-0.0187479	0.577189
1158	3940152	TSPAN31	0.0278883	0.539022	-0.028058	0.536234	-0.0288195	0.653633	0.10967	0.0799153	-0.000450165	0.0875714	0.000169757	0.146722	-3.81099e-05	0.72543	-0.000229392	0.366241	0.000231348	0.000562459	-0.000925513	0.685849	0.0479918	0.339613	-0.00911165	0.857862
1159	4730189	ITGA3	0.0215422	0.419511	-0.000836311	0.974098	-0.0368181	0.299211	-0.000860227	0.980993	-0.000167283	0.276506	8.13635e-05	0.235783	2.18682e-05	0.722355	-4.47939e-05	0.762864	8.50018e-05	0.0280834	-0.00113745	0.385583	0.017771	0.539555	-0.0356157	0.228819
1160	6560154	ITGA3	0.00729656	0.852373	-0.0588925	0.130604	-0.0311847	0.568174	-0.009076	0.866514	-0.000228661	0.315115	9.42019e-05	0.350558	-7.60096e-05	0.414882	-4.88914e-05	0.823279	-6.34683e-05	0.272483	-0.00111337	0.572431	0.00526892	0.902984	0.02412	0.584145
1161	2970315	SRY	-0.0287734	0.326177	0.0312352	0.281632	-0.021859	0.590714	0.0595217	0.13955	-0.000231626	0.172381	2.79781e-05	0.711183	1.64996e-05	0.809853	-2.70044e-05	0.868893	1.78811e-05	0.677226	-3.43944e-05	0.98127	0.027323	0.397617	-0.0333855	0.307172
1162	4830402	SYNE1	0.00172503	0.950171	0.00310935	0.907854	-0.0737255	0.0447871	0.0187067	0.61953	-0.000230036	0.150433	7.72442e-05	0.277235	4.76378e-05	0.453053	-0.000359393	0.0192057	5.13915e-05	0.200285	0.000287073	0.833773	-0.0384295	0.200957	0.0576298	0.0617665
1163	1430167	LARS2	0.0659583	0.119203	0.0231658	0.583637	-0.0601724	0.310173	0.0758112	0.195052	6.77265e-06	0.978059	-7.18328e-05	0.509538	7.04101e-05	0.486749	0.000437522	0.0641966	1.91625e-05	0.759733	-0.000506418	0.812974	-0.0360696	0.44048	0.00235345	0.960785
1164	620543	TNXB	0.0152324	0.568909	-0.0160796	0.537071	-0.0647708	0.0677127	-0.00155883	0.96609	3.93826e-05	0.79998	2.96812e-05	0.666971	7.06317e-06	0.907044	-3.1317e-05	0.833123	-2.71838e-05	0.482475	0.000496277	0.708186	-0.021985	0.451179	0.0334908	0.263093
1165	5700243	CYP4F8	0.0119998	0.709426	-0.0259806	0.408656	0.0253005	0.553907	-0.0321559	0.466357	2.6093e-05	0.889193	4.4217e-05	0.594271	-0.000103859	0.159442	-0.00029526	0.0989551	-7.29569e-05	0.119235	-0.000662978	0.679072	-0.0245148	0.484758	-0.0285499	0.430008
1166	2570037	SYN1	-0.0137608	0.618764	0.00850891	0.75231	-0.0191831	0.601042	0.0336275	0.374014	7.38574e-05	0.645634	-5.98888e-05	0.40061	4.7188e-05	0.458263	6.25679e-05	0.683896	9.95655e-07	0.980257	0.00238637	0.0825004	0.00226384	0.940031	-0.0161643	0.602349
1167	6400470	ZNF267	-0.0299482	0.297619	-0.0211768	0.450887	-0.0121082	0.752323	-0.0175183	0.655897	8.65453e-06	0.958639	2.25181e-05	0.761011	-5.72998e-06	0.931585	-0.000270649	0.090451	-3.76251e-06	0.928561	-0.00233623	0.102644	0.010804	0.730041	0.0334716	0.299693
1168	620288	WDR69	0.00413246	0.877026	-0.0274168	0.29097	-0.0534688	0.130787	-0.00322406	0.929623	-7.51236e-05	0.627755	-2.99668e-05	0.663348	7.0032e-06	0.908191	-0.000105321	0.478037	6.52085e-05	0.0918116	-0.000526198	0.690576	0.0461823	0.112352	-0.0549231	0.0656666
1169	3940309	PIP5K2B	-0.0031233	0.922475	-0.0239559	0.448267	0.012605	0.775681	-0.0672276	0.125244	-0.000142367	0.443058	-1.09116e-05	0.894838	1.57763e-05	0.835752	-0.000167122	0.350858	5.06356e-05	0.282751	0.00115665	0.470024	0.00210281	0.952386	0.0152232	0.671081
1170	5960681	CACNG5	-0.0489687	0.0768493	-0.0293607	0.273057	-0.00674347	0.855315	0.066091	0.0779428	-7.60897e-05	0.633378	-8.98826e-05	0.20658	5.00915e-05	0.435254	0.000208573	0.175755	-2.1559e-05	0.592164	-4.58666e-05	0.973152	-0.0111266	0.711499	0.0279578	0.36292
1171	7200653	DST	0.0186987	0.497452	-0.0315778	0.241656	-0.0330439	0.366705	0.0393118	0.299697	-6.6238e-05	0.680034	-1.5221e-05	0.830454	0.00015033	0.0167181	-6.66353e-05	0.663458	3.55653e-05	0.374519	-0.00119512	0.384383	0.00899517	0.764989	0.0378511	0.222525
1172	3440026	PDCD1	0.294056	0.000944039	0.23025	0.0101532	0.151344	0.236308	0.256528	0.0373941	-0.000763329	0.140002	0.000286676	0.210993	0.000473996	0.0271126	-0.000698377	0.160989	4.7318e-05	0.719873	0.00230588	0.608624	-0.149833	0.129543	0.241974	0.0155121
1173	7040577	ACVR1C	-0.00189399	0.947158	0.031973	0.259603	0.0409981	0.295744	0.0231401	0.559637	9.30328e-05	0.577239	-5.64886e-06	0.93889	2.07369e-05	0.753238	0.000144048	0.365233	-3.87214e-05	0.355527	0.000904458	0.529816	0.00673637	0.830852	0.0376021	0.244131
1174	4200176	ICT1	-0.0293937	0.399495	-0.0909386	0.00951065	-0.0492476	0.319701	-0.0685707	0.156592	0.000310529	0.126555	-3.77346e-05	0.674115	4.53674e-05	0.589623	-0.000147684	0.448943	-3.17631e-05	0.539922	0.00146362	0.408877	0.022982	0.552399	-0.0509951	0.19779
1175	870358	PYCARD	-0.18432	0.0426778	-0.272792	0.00298165	-0.15708	0.229486	-0.267951	0.0344041	0.000761503	0.151161	-4.90448e-05	0.834247	-0.000618032	0.00461751	-0.000642444	0.206761	-0.000217591	0.107041	-0.000880732	0.848888	-0.0188575	0.852164	-0.0817634	0.425314
1176	5890239	JRK	-0.0255603	0.397852	-0.0623004	0.0372919	-0.0350218	0.395766	-0.0479697	0.250356	6.46067e-05	0.71375	8.56617e-05	0.271368	-3.08303e-05	0.662562	-5.84943e-05	0.728231	5.91991e-05	0.182421	0.00319407	0.03573	-0.0596786	0.0723862	0.0272743	0.424976
1177	380273	PSMD5	0.0873948	0.109938	0.0932398	0.0882328	0.0926351	0.232953	0.0501304	0.505942	0.000111092	0.726297	-0.000160605	0.253771	0.000265015	0.0446547	0.000107801	0.724653	-4.43896e-05	0.583533	0.00228655	0.407232	-0.0610927	0.312831	-0.00479408	0.937789
1178	130095	LRRC17	-0.00118109	0.971233	0.00834825	0.796889	0.00115376	0.979632	-0.0403841	0.371689	-0.000106324	0.576413	7.63657e-05	0.365869	1.36939e-05	0.857103	3.08986e-05	0.865642	-3.59755e-05	0.45354	-0.000436469	0.790333	-0.0204904	0.570344	0.0411252	0.262159
1179	5130424	STX1A	0.0616881	0.453793	-0.0390557	0.63838	0.0734524	0.534383	0.184262	0.108361	-0.000448803	0.35023	-0.000142426	0.502618	0.000257148	0.189724	-0.000624284	0.175121	0.000187302	0.125154	-0.00405475	0.332705	0.156119	0.0885461	0.0953481	0.303139
1180	6560022	VSIG8	-0.0238128	0.416139	0.0657835	0.0224818	-0.052514	0.189512	0.00732807	0.85546	-1.86997e-05	0.912275	6.71428e-05	0.373912	-3.57863e-05	0.596756	-5.5043e-05	0.735983	7.74093e-06	0.856279	-0.00212317	0.145746	0.0744468	0.0206938	-0.040339	0.217109
1181	1690458	PCDH11X	-0.0361757	0.202808	0.0166033	0.547466	-0.0402243	0.285484	0.00859651	0.824414	-0.000224704	0.172254	6.592e-05	0.367572	1.08317e-05	0.867973	-3.84542e-05	0.807571	-3.46017e-05	0.401452	0.000870303	0.535951	-0.0480928	0.119476	0.0214125	0.499902
1182	670360	AAK1	0.0134639	0.640104	0.0116169	0.680172	0.054116	0.16701	0.0755334	0.0544866	-3.12038e-06	0.98504	0.000167749	0.0236012	-0.000175542	0.0090841	-4.16261e-05	0.795381	-3.29856e-06	0.937513	-0.00239995	0.0932137	-0.0274866	0.382941	0.0123515	0.70034
1183	940039	RAB25	-0.00478037	0.873909	-0.033937	0.254406	0.0324841	0.437019	-0.0617101	0.134963	0.00024738	0.156014	-4.47951e-05	0.563462	-1.81029e-05	0.799815	-5.27766e-06	0.97497	-5.4689e-05	0.216848	-0.00159782	0.288917	-0.0361923	0.274838	-0.00182328	0.95681
1184	270735	HYAL1	0.0197347	0.506019	-0.0212285	0.466587	0.00918241	0.820828	0.0206542	0.611459	0.000528944	0.00205721	-0.000137184	0.0729869	-4.09022e-05	0.550862	-0.000112645	0.49603	-4.17192e-05	0.334828	-0.000708208	0.631148	-0.00884429	0.786066	0.0219883	0.50571
1185	6130059	HYAL1	-0.028141	0.280848	-0.019192	0.456952	0.0201072	0.574387	0.0424164	0.237884	4.96718e-05	0.743282	2.38833e-05	0.722282	8.07043e-06	0.895004	5.80832e-05	0.689611	-8.46992e-05	0.0270953	-0.000828503	0.526898	0.00913657	0.750071	-0.0186008	0.526257
1186	4040278	PPP6C	-0.0869915	0.00167825	2.83622e-05	0.999184	0.00412799	0.9155	-0.0593683	0.121734	-8.58325e-05	0.594607	-5.07206e-05	0.476426	5.3434e-05	0.420708	-4.99428e-06	0.974233	8.19796e-06	0.84171	0.000275842	0.844296	0.00757843	0.80459	0.00245436	0.937757
1187	990674	LOC148898	-6.2685e-05	0.998213	-0.013781	0.611192	-0.0233195	0.529026	-0.022145	0.560902	-0.000272965	0.0918054	3.11493e-05	0.665702	4.63997e-05	0.468291	-0.000288876	0.0634322	8.33515e-05	0.0398026	-0.00185628	0.17874	0.0054887	0.856805	0.0469942	0.131708
1188	60497	TIGD6	-0.0406676	0.191704	-0.0192436	0.521463	0.00217083	0.957928	-0.0183124	0.663836	-0.000124708	0.487518	5.43161e-05	0.497639	-3.11177e-05	0.665075	-2.23934e-05	0.897093	2.62055e-05	0.562033	-0.000290349	0.849526	0.0283127	0.401312	-0.00523924	0.879602
1189	3440224	RPL32	-0.0451325	0.22622	-0.0439994	0.234492	-0.0735704	0.156818	-0.0275703	0.590798	0.000137086	0.526247	6.05817e-05	0.527893	-7.4821e-05	0.399246	0.00039814	0.0559252	-5.87053e-05	0.285684	-0.00138936	0.458302	0.00052193	0.989866	-0.00640079	0.878438
1190	4920113	C3orf30	-0.0865578	0.000979956	-0.0306127	0.229259	-0.0712987	0.0402499	-0.070645	0.0486007	-0.00016808	0.268924	8.48923e-05	0.209893	-0.000101701	0.0868988	-9.05919e-05	0.534984	-7.38763e-05	0.0514231	-0.000432892	0.738265	0.0160682	0.574222	0.00734061	0.801805
1191	50068	SCAND1	-0.119778	0.000293017	-0.115831	0.000469456	-0.0220729	0.63483	-0.13478	0.00326324	0.000286262	0.137272	3.41818e-05	0.687908	-0.000136428	0.0851585	-3.00203e-05	0.870896	-4.92683e-05	0.314942	0.000779974	0.641866	0.0218991	0.549481	0.0253015	0.500067
1192	150053	ZNF582	-0.0060912	0.832188	-0.0635826	0.0228828	-0.07375	0.0528603	-0.0370557	0.344937	2.15491e-05	0.897134	-1.42772e-05	0.847114	1.39633e-05	0.832201	-6.10133e-05	0.702543	8.05201e-05	0.0536928	-0.00046777	0.742501	-0.0283846	0.363907	0.0234527	0.465595
1193	2710722	ARL6IP6	0.0504603	0.362785	-0.011343	0.838315	0.0124673	0.87475	-0.0744833	0.330445	-6.89533e-05	0.83045	-6.70969e-05	0.638295	2.59399e-05	0.846652	0.00060069	0.0530545	4.49618e-05	0.584375	0.00612137	0.0288873	0.00801074	0.896293	-0.046144	0.459233
1194	4670286	C14orf172	-0.0596938	0.218453	0.0292243	0.548802	-0.0568321	0.409335	-0.0262104	0.696849	0.00064643	0.0221191	-5.16814e-05	0.678766	-5.51391e-05	0.636945	-3.75205e-05	0.889968	-0.000120919	0.0931504	0.000468422	0.849107	0.0271487	0.613723	-0.0410206	0.455295
1195	4560576	HSA9761	0.0258072	0.575329	0.0327175	0.478227	0.0753079	0.249082	0.0817325	0.198957	-0.000314528	0.239974	5.71913e-05	0.629377	0.000156831	0.158351	0.000193532	0.452695	-5.46618e-05	0.42356	-0.000213915	0.926826	-0.0139258	0.784813	0.0533566	0.304225
1196	650400	ARHGEF10	-0.115764	0.493609	-0.248504	0.145502	-0.23003	0.344628	-0.389716	0.0976164	-0.000203395	0.836403	-0.000231961	0.595157	-0.000198956	0.622206	0.000231852	0.806418	-0.000139146	0.578917	-0.00768405	0.370531	0.00831942	0.964759	-0.0040665	0.982886
1197	6510441	CGREF1	0.0215935	0.489867	0.0508332	0.0935282	-0.047514	0.25099	0.0240197	0.573091	-4.22514e-05	0.815417	4.63386e-05	0.565347	8.41059e-05	0.235774	-1.25008e-05	0.942685	-3.71402e-05	0.411221	-0.0012403	0.421355	0.0736112	0.0305552	-0.0233218	0.503057
1198	2230170	RAB7B	-0.0212338	0.463606	0.0364588	0.208039	0.0128594	0.750702	0.0566034	0.158444	-0.00018831	0.264671	-4.83853e-05	0.516367	3.01986e-05	0.661928	0.00031289	0.0529565	-3.07498e-05	0.473366	0.0012817	0.38272	-0.0104966	0.743037	0.0196238	0.550716
1199	6660471	MRPL11	-0.186399	1.51439e-10	-0.0972174	0.000901516	-0.073084	0.0775607	-0.0450735	0.265194	0.000233285	0.169202	5.68375e-05	0.448046	-0.000118197	0.0906958	6.65763e-05	0.682389	-8.51759e-05	0.0487063	-0.00106273	0.472466	-0.0354656	0.272361	-0.0379685	0.249476
1200	2340520	FAM77D	0.0195937	0.513675	-0.0308732	0.297136	0.00291306	0.942996	0.0445279	0.283179	9.468e-05	0.588387	2.50613e-05	0.745996	-0.000104893	0.12755	6.23339e-05	0.708869	-3.30637e-05	0.450592	-0.000217096	0.885228	-0.0112881	0.732268	0.016033	0.635108
1201	870370	XPO4	0.019847	0.680415	0.0609325	0.20965	0.0519003	0.453622	0.0429204	0.520943	0.000143169	0.60962	3.73029e-05	0.763936	0.000103132	0.373675	0.000253353	0.347759	-0.000110524	0.1221	-0.00172559	0.479774	0.0216407	0.686297	0.00758093	0.888681
1202	6020594	GCNT3	0.00300592	0.920733	0.0195783	0.506775	-0.0312468	0.435733	0.0604828	0.144439	-4.4582e-05	0.799738	-1.28206e-05	0.869259	6.59711e-05	0.338527	-0.000124395	0.458679	-3.82241e-05	0.38357	0.00166284	0.268363	0.0101301	0.758434	0.0368821	0.276855
1203	6560100	FANCB	-0.0151057	0.665474	-0.0777733	0.024892	-0.0300859	0.529017	-0.0222012	0.64592	0.000314614	0.122603	-8.86529e-05	0.32461	-8.89795e-06	0.913529	-6.7862e-05	0.727227	-4.9331e-05	0.33729	-0.00225049	0.201938	0.0373501	0.331186	0.00301182	0.939477
1204	7320452	FANCB	0.0321838	0.231273	0.0105571	0.686828	-0.0668924	0.0606285	-0.0632436	0.0850076	0.000304001	0.0513507	-9.92629e-06	0.886011	3.57353e-05	0.564609	-0.000119298	0.424558	7.36829e-06	0.850665	-0.0012697	0.341599	0.0605175	0.0383977	-0.0480192	0.11108
1205	6450025	MRPL42	0.0387081	0.369422	0.0308341	0.478539	-0.0364274	0.555678	-0.0603728	0.314105	-0.000240584	0.338535	-7.94333e-05	0.474272	0.00014076	0.175828	0.000495938	0.0398929	1.70397e-05	0.790289	0.00257193	0.240519	0.00383323	0.936262	-0.0120826	0.804378
1206	5340484	CDC2	0.103188	0.122489	0.111245	0.0980678	0.0594049	0.531399	0.142497	0.125341	0.000134757	0.729612	-0.000354883	0.0390491	0.000220017	0.169361	0.000192073	0.606886	-0.000112514	0.256702	0.00318379	0.349013	-0.0606578	0.413558	-0.064078	0.39822
1207	3420291	LRRC18	-0.0302548	0.277119	-0.000106225	0.99688	-0.0262842	0.476632	-0.0830347	0.0298785	0.000143103	0.377083	-0.000157168	0.0286455	-1.49193e-05	0.812721	0.000334912	0.030419	-4.59623e-06	0.909249	-0.000137376	0.920849	0.0278378	0.359792	-0.0196944	0.528006
1208	6250201	SH3BP2	0.0005099	0.991402	-0.0357569	0.448306	-0.0377731	0.570797	-0.0361927	0.578383	0.000410097	0.135204	-0.000369132	0.00242748	2.80734e-05	0.805059	-0.00037907	0.151962	-9.00124e-08	0.998974	0.00356474	0.13475	0.00572263	0.912808	0.0186622	0.725552
1209	60221	CDY1B	-0.0146267	0.674605	-0.031455	0.350278	0.0458306	0.319804	0.013624	0.773592	-0.000198486	0.323725	0.000149433	0.0960707	-5.79638e-05	0.46213	-0.000132678	0.493517	1.74134e-05	0.728892	-0.000430516	0.801547	-0.0296193	0.43446	0.0228713	0.554357
1210	610184	CDY1B	-0.0318758	0.275213	-0.0658162	0.0210471	-0.0207148	0.593203	-0.0629944	0.115481	0.00030043	0.0769185	-0.000174511	0.0204535	4.36715e-05	0.515808	-9.45843e-05	0.560115	-2.50827e-05	0.555293	0.00221339	0.128015	-0.0101464	0.749752	-0.0103193	0.753278
1211	4280369	SDPR	-0.146836	0.249379	-0.152067	0.23736	-0.248886	0.174337	-0.69523	8.8202e-05	-0.000788873	0.2883	-0.000454451	0.166372	0.000147485	0.630817	0.0016829	0.0183766	5.42316e-05	0.774507	0.00691645	0.285226	-0.186726	0.187811	0.12665	0.378539
1212	3520709	FXYD4	-0.0372671	0.218032	-0.0262637	0.373818	0.0735136	0.0731788	0.0260249	0.527361	-0.000190594	0.2752	-4.17856e-05	0.59133	5.79854e-06	0.934687	-5.90329e-05	0.726267	0.000104894	0.0175925	0.000833646	0.578135	-0.0149274	0.651512	-0.0192472	0.567687
1213	2970176	OR2J3	0.0120153	0.721443	0.0172569	0.601618	0.00994022	0.827334	-0.00255191	0.956033	-0.000108918	0.577589	-1.24489e-05	0.886084	-1.46665e-05	0.849435	7.80578e-05	0.677429	3.09233e-05	0.528476	-0.000573415	0.732458	0.0279526	0.449297	0.000530174	0.98877
1214	70192	LONRF3	0.0708362	0.19023	0.128115	0.0182695	0.0446034	0.560944	0.207121	0.00569944	-0.00074875	0.0173634	5.83559e-05	0.674866	0.000111968	0.390149	2.57899e-05	0.932032	0.000172995	0.0311323	-0.00366165	0.181741	0.0499015	0.405006	0.108142	0.0771581
1215	670017	TTN	-0.0332665	0.238504	0.0620287	0.0222683	-0.0242974	0.515033	0.0116931	0.75878	-9.08864e-05	0.575913	2.78535e-05	0.700881	-0.00010407	0.111211	0.00022567	0.150378	-2.29791e-05	0.574827	0.0008379	0.544795	-0.0105756	0.729175	-0.0359203	0.250768
1216	4540468	G3BP	0.143594	0.00274716	0.155254	0.00133667	0.130047	0.0588415	0.169596	0.0110141	-0.000547639	0.0500815	4.60864e-05	0.709011	0.000158289	0.170074	0.000197537	0.461652	0.000172723	0.0152879	0.000682731	0.779263	-0.00300178	0.955106	0.0155849	0.773451
1217	10142	TUB	-0.0256684	0.35173	-0.0403936	0.128348	-0.00902232	0.804293	-0.0240827	0.518932	0.000133551	0.400047	8.20517e-06	0.908008	-3.41416e-05	0.5844	-0.000186465	0.223953	2.11452e-05	0.594316	0.000176775	0.895876	0.00373734	0.900679	-0.0303261	0.320502
1218	2190022	TUB	0.0196921	0.538423	0.0158308	0.618565	0.00476769	0.914969	-0.0191248	0.664609	0.000266442	0.15104	5.32378e-05	0.519109	-0.000135454	0.0707576	-0.000121568	0.496457	1.29696e-05	0.782496	0.0023567	0.141668	-0.00301086	0.932128	-0.0278716	0.435242
1219	4830121	FBLN1	-0.0111956	0.718881	-0.016867	0.57595	-0.0434029	0.291773	0.0221007	0.602425	-3.88442e-05	0.829203	-6.03001e-05	0.452078	4.10717e-05	0.559404	-0.000183058	0.289851	2.51204e-05	0.575997	0.00318479	0.0379226	0.0285124	0.399928	-0.0220882	0.523649
1220	3930386	TTC13	0.00615898	0.847784	0.0294332	0.347054	-0.0301907	0.485569	-0.00218011	0.960277	8.77539e-05	0.635656	-0.000126032	0.127578	0.000112901	0.124876	-3.8652e-05	0.828833	4.89177e-05	0.293411	0.0019105	0.228407	0.0318227	0.364596	-0.054384	0.127102
1221	4120039	TTC13	0.144026	0.000208032	0.02789	0.473173	0.0820131	0.136691	0.0818152	0.126988	0.000145154	0.519906	-0.000111998	0.262279	7.00721e-05	0.454651	-0.000271816	0.210926	0.000165194	0.00410611	-0.00258231	0.188221	-0.00947094	0.825642	0.0042724	0.922179
1222	4150338	APOE	-0.015415	0.61846	-0.00614868	0.841218	-0.00907918	0.831174	-0.0122722	0.774034	0.000414827	0.0213243	3.91239e-05	0.623585	-0.000129307	0.0748194	-2.6259e-05	0.879002	-8.7568e-05	0.0543948	-0.00128578	0.409189	0.0096341	0.777383	-0.00920889	0.792024
1223	2690373	HCN4	0.065879	0.0105363	-0.00198898	0.936059	0.0830635	0.0145954	0.0363958	0.296078	-6.24122e-05	0.673828	5.55889e-05	0.401707	7.43653e-06	0.899278	-7.88774e-05	0.581868	2.68651e-05	0.470068	0.000766621	0.543503	-0.0336808	0.227973	0.0140873	0.621454
1224	1230253	PLA2G10	-0.120156	0.095623	0.0013888	0.984702	0.0963844	0.347686	0.0199005	0.842465	-0.00022907	0.585282	0.000251226	0.176767	-0.000208859	0.222209	8.67481e-05	0.829571	-5.79034e-05	0.58724	-0.00637362	0.0807462	0.114612	0.15237	-0.0105707	0.896034
1225	940129	ITGB1	-0.00231968	0.935219	0.022708	0.42362	0.00313165	0.937429	0.000211205	0.995718	0.000177229	0.284194	5.24422e-05	0.476294	-9.96803e-05	0.136337	3.77561e-06	0.981103	3.41503e-05	0.41521	-0.00129652	0.364894	0.0281439	0.372175	-0.0121324	0.70332
1226	5890707	ITGB1	0.0277228	0.70565	0.0642416	0.384416	-0.00437488	0.96668	-0.217753	0.032435	-0.00069929	0.101732	-8.2436e-06	0.965176	0.000258742	0.144645	0.000562689	0.170686	0.000273283	0.0122012	0.0135275	0.000281257	-0.0472324	0.561975	0.0085488	0.918016
1227	2260025	PLSCR3	-0.0138296	0.738572	-0.0457433	0.27021	0.0148849	0.797196	-0.0321898	0.576012	0.000540388	0.0254772	6.63965e-05	0.533668	-0.000233302	0.0177953	0.000125675	0.586644	-0.000117967	0.0544871	0.00251708	0.231792	-0.00105583	0.981633	-0.0416945	0.376867
1228	3610037	KCNK9	-0.0268038	0.311463	-0.0129615	0.624131	-0.000326763	0.992947	0.0356049	0.331332	-0.000361913	0.0189547	9.18164e-05	0.177851	9.19086e-06	0.884353	-0.000207683	0.159952	-1.81184e-06	0.963131	-0.001737	0.195279	-0.0601938	0.0395905	0.0856843	0.00434398
1229	4880243	C8orf61	0.0849422	0.11593	0.0647285	0.234958	0.0337002	0.662249	0.0721478	0.337642	-0.000567494	0.0719315	7.53182e-05	0.588065	0.000177999	0.170675	-7.2376e-05	0.810644	7.88789e-05	0.325909	-0.0038185	0.165176	-0.102694	0.0872463	0.0922248	0.132733
1230	3460019	DAAM1	0.0896496	0.0883157	-0.0704716	0.183148	-0.195473	0.00937869	-0.118762	0.103451	-8.18487e-05	0.789172	2.23764e-05	0.868715	-0.000194278	0.126284	0.000260305	0.376681	5.27514e-05	0.49947	-0.00203064	0.446423	0.0510792	0.381746	-0.0301005	0.612219
1231	110577	LOC285989	-0.126706	0.00693595	-0.163872	0.000503019	-0.192008	0.00419119	-0.100765	0.120144	0.000460716	0.0910705	-4.29241e-05	0.722432	5.9102e-05	0.602433	0.000256242	0.329605	-0.000123653	0.0755608	-0.00264897	0.264202	-0.0379143	0.466366	0.0399701	0.448775
1232	840064	LOC285989	-0.150168	5.0637e-05	-0.0620755	0.0818597	-0.160816	0.00101438	-0.147772	0.00319873	0.000278486	0.191736	-4.93286e-05	0.605041	7.64912e-05	0.36477	-2.16425e-05	0.91636	-8.00221e-05	0.134545	-0.00188538	0.299022	0.00292429	0.942015	-0.00513705	0.90039
1233	6520477	GPR50	0.0581496	0.067583	0.0380382	0.222383	0.106446	0.0117982	0.0615697	0.160666	4.56704e-05	0.805777	-1.79968e-05	0.826516	-1.29073e-05	0.857649	0.000126723	0.473452	2.92428e-05	0.526472	-0.000731218	0.644959	-0.00336767	0.922939	0.0322339	0.368628
1234	580204	DDX11	-0.0357015	0.206885	-0.00911935	0.738211	-0.0163521	0.66176	-0.0514622	0.179574	-2.40719e-05	0.882647	3.16063e-05	0.664357	-1.95058e-05	0.761739	-0.00022447	0.153592	7.69446e-05	0.0595048	-0.000216833	0.875894	0.0299327	0.32983	-0.044656	0.154621
1235	150600	PKMYT1	0.0222145	0.538045	0.00623383	0.859042	0.0205094	0.672067	0.0353693	0.471683	-8.04648e-05	0.699044	1.62627e-05	0.861163	-0.000107995	0.190371	0.00011166	0.578423	-3.43524e-05	0.510966	-0.000166058	0.925672	-0.0317083	0.421037	0.0246604	0.538085
1236	6280168	NEIL2	-0.0290076	0.518731	0.0248717	0.582514	0.00612661	0.923664	0.0809234	0.196149	9.87228e-05	0.706732	0.000231777	0.0452775	-0.000180913	0.0915325	0.000226371	0.367309	-5.44752e-05	0.414006	0.000613819	0.788344	-0.0958884	0.05486	0.0154931	0.760815
1237	6040603	XKR3	0.0128262	0.639755	-0.0547909	0.0380499	-0.00116622	0.974301	0.0454701	0.22073	-4.13839e-05	0.7931	-1.45637e-05	0.836586	-2.83678e-05	0.647225	7.82791e-05	0.607619	2.12993e-05	0.589335	0.000926769	0.490139	-0.0227611	0.44468	0.0321265	0.289798
1238	6100328	NCDN	-0.00723472	0.818453	-0.00254327	0.934183	0.0192542	0.645425	0.00577362	0.893495	5.84483e-05	0.74962	3.92211e-05	0.629032	-3.38114e-05	0.643999	-4.79487e-05	0.784231	-3.66926e-05	0.425124	-0.00124488	0.42819	-0.0116213	0.734551	0.0555774	0.117079
1239	4610390	AGER	-0.0245975	0.485376	-0.0118425	0.735996	0.0649533	0.185278	0.0409278	0.401576	-5.04574e-05	0.805889	-3.02316e-05	0.73913	-6.2181e-05	0.455334	0.000162699	0.408038	-4.96297e-05	0.34009	-0.000874723	0.623258	0.0119463	0.758909	-0.0463563	0.244546
1240	5090672	AGER	-0.0489236	0.073013	-0.0681357	0.0102265	0.0342808	0.343195	0.00114595	0.975438	-6.34157e-05	0.688535	2.02897e-05	0.772788	-0.000124276	0.0481258	0.000108993	0.472334	-4.55131e-06	0.908696	0.000483407	0.720781	-0.0359214	0.225753	0.0309784	0.310291
1241	3190010	FTH1	0.149901	0.0696011	0.307992	0.000225375	0.161499	0.17365	0.178612	0.120769	-0.000528653	0.272978	-9.75159e-05	0.646692	-3.34448e-05	0.866472	-9.5276e-05	0.83676	-1.1764e-06	0.992353	0.000971792	0.817129	0.102418	0.26506	-0.0186277	0.842074
1242	3060746	MLSTD2	0.030762	0.372093	-0.0316492	0.35451	0.0465387	0.32611	0.163619	0.000572277	5.76171e-05	0.773805	-7.01521e-05	0.429001	6.34601e-05	0.436819	-0.000317659	0.0982286	8.09982e-05	0.110896	3.05895e-05	0.985945	0.00607553	0.872598	-0.00399273	0.918414
1243	7380390	COL1A1	0.0125999	0.726865	0.11524	0.00138786	-0.0045397	0.928492	0.136414	0.0064683	-0.00014935	0.477526	-2.99819e-05	0.747162	0.000135179	0.109997	0.000225512	0.262504	-9.80836e-06	0.853707	0.00019907	0.913024	0.0101816	0.798858	0.0210487	0.603962
1244	1990639	GRM8	0.0237603	0.488432	0.00161043	0.961843	0.0646869	0.163303	0.0189481	0.687717	0.000297389	0.135334	9.37743e-05	0.288969	-5.98988e-05	0.446222	-0.000214596	0.261097	-0.000110591	0.0268141	-0.000790396	0.6436	-0.0269638	0.473425	0.0371605	0.332666
1245	4040301	LUZP5	0.00760539	0.774619	-0.0247891	0.344107	-0.0252569	0.489831	0.0416574	0.25324	0.000233124	0.12937	-8.93862e-05	0.191917	9.72237e-06	0.874774	0.000116006	0.433766	-4.92422e-05	0.204561	-0.0017228	0.193126	0.0118901	0.684158	-0.0210668	0.476502
1246	4210673	MTUS1	0.00753489	0.792876	0.0078555	0.778078	-0.0167421	0.664061	0.0121136	0.755922	9.37161e-05	0.571236	1.35015e-05	0.854899	-1.22325e-05	0.854083	0.000114457	0.473842	3.94301e-05	0.344882	0.00187561	0.185344	-0.0369742	0.237025	0.00789916	0.804337
1247	1580431	CERKL	-0.047127	0.594208	-0.191573	0.0312631	-0.0733959	0.562285	-0.083125	0.497183	0.00066246	0.197737	6.44115e-05	0.777281	-2.7411e-05	0.898115	-0.000779333	0.115762	-5.11295e-06	0.968939	0.00581929	0.193801	-0.09722	0.322084	0.0162885	0.870186
1248	1470762	LARS	0.0429804	0.582706	-0.0643947	0.414643	-0.139089	0.216034	-0.230114	0.0344879	9.75127e-05	0.830584	0.000232996	0.248259	-0.000331563	0.0762554	0.000115828	0.791255	-8.11228e-05	0.484438	-0.00427783	0.281331	0.0083193	0.923875	0.0548358	0.532519
1249	7160564	GCC2	0.0211707	0.61242	0.055627	0.178512	0.0820774	0.153886	-0.0176186	0.75905	-0.000167112	0.490906	-8.27036e-05	0.441754	-5.23954e-05	0.596546	0.000611718	0.00866924	6.69328e-05	0.27674	9.75711e-05	0.96291	0.0512882	0.263971	-0.0594588	0.206113
1250	2470519	TUSC4	0.117436	0.0141015	0.0151976	0.752184	0.0465599	0.497495	0.125509	0.0580631	-0.000158538	0.568695	3.84197e-05	0.755251	0.000155361	0.178887	-0.000478412	0.0742689	0.000220007	0.00193689	-0.000484377	0.841449	-0.0352327	0.50728	0.0249627	0.64268
1251	1990491	IDUA	0.0838483	0.0794617	0.149026	0.00188594	0.0952808	0.15853	0.159449	0.016067	0.000226797	0.415181	0.00024601	0.0454481	-0.000184126	0.109543	-0.000385948	0.14864	-0.000108135	0.127473	-0.00278197	0.25128	-0.0651778	0.218283	0.0685438	0.205878
1252	2360187	GCC2	-0.0398404	0.183049	-0.0106016	0.717233	0.00876696	0.825404	-0.0283749	0.490544	5.15403e-05	0.767556	-2.4597e-05	0.749984	-8.00065e-05	0.24019	0.000126123	0.448142	-2.87716e-05	0.507989	0.000744725	0.617456	-0.0305991	0.349041	0.0163001	0.628337
1253	2370438	C4B	-0.00871222	0.777427	-0.0079719	0.789763	-0.0435982	0.289865	-0.104901	0.0122994	0.000285463	0.10818	-8.81029e-05	0.267259	-3.39751e-05	0.629169	-0.000203483	0.235705	1.26367e-05	0.776883	-0.00203617	0.179716	0.0456894	0.173967	-0.0165863	0.627655
1254	7400377	SSX2	0.0389667	0.211744	-0.00651456	0.830455	-0.0309727	0.46052	0.0103067	0.80884	-7.26343e-06	0.967872	-0.000125867	0.117639	0.000151611	0.0336457	-0.000128383	0.460051	1.77187e-05	0.695439	0.0014905	0.334148	-0.000300611	0.992969	-0.0339704	0.32766
1255	780600	KLK6	-0.0532464	0.0563393	0.0266474	0.327628	0.00451681	0.902873	0.0249201	0.515485	9.97503e-05	0.539001	5.55905e-05	0.439953	-4.87641e-05	0.439746	-0.000205784	0.184505	6.83227e-05	0.0909135	0.00128869	0.352348	0.0684158	0.0247302	-0.0404523	0.1959
1256	1580709	KLK6	0.00392763	0.877472	0.00624488	0.804265	-0.0488405	0.161817	-0.045193	0.197503	-0.000391597	0.00818539	0.000111128	0.0901422	4.75207e-05	0.428365	-0.000340218	0.0165533	6.08664e-05	0.104295	-0.000945067	0.460291	0.0521436	0.0623539	-0.0579775	0.0435573
1257	2600192	UBE2D3	-0.0257701	0.604464	0.0305382	0.540508	0.0367064	0.605037	-0.0824993	0.229863	9.54128e-05	0.741274	6.85024e-05	0.592853	-0.000165052	0.169392	3.95934e-05	0.886971	6.11634e-06	0.933887	-0.00146636	0.559732	-0.00519134	0.92502	0.0684013	0.221171
1258	5670100	AYTL1	-0.0706797	0.33851	-0.0930779	0.210355	-0.164815	0.118697	0.00256246	0.980056	0.000772155	0.0722445	-6.73077e-06	0.971833	-0.000265003	0.131462	-3.97946e-05	0.923251	-0.000105968	0.33209	0.0025611	0.49301	-0.0571208	0.486579	0.0724724	0.380648
1259	3710484	FBXL20	0.123697	0.00495129	0.159778	0.000291058	0.0832399	0.18042	0.0716112	0.240803	-0.000375838	0.14266	0.000137756	0.224269	-0.000152262	0.146344	0.000252528	0.304358	0.000101802	0.118207	-0.00144257	0.51761	-0.00912538	0.851581	-0.00539389	0.91353
1260	5820332	ZNF117	-0.0132318	0.643415	-0.039796	0.155648	0.000412658	0.99146	0.00606983	0.877208	-8.88494e-05	0.592545	5.21472e-05	0.479255	-6.29457e-06	0.923322	-1.08313e-05	0.945723	-9.53635e-06	0.818654	0.000962563	0.498823	-0.0635163	0.0425984	0.063411	0.0474057
1261	6650278	MAOA	0.0307276	0.390765	0.0467204	0.187403	0.00245799	0.96008	-0.000822326	0.986695	0.000182433	0.380858	9.05025e-05	0.326102	-9.84568e-05	0.243384	-5.28707e-05	0.791028	-7.7061e-05	0.143573	0.000950834	0.597369	0.010152	0.796329	-0.0104948	0.795047
1262	6110719	CIDEB	0.0896611	0.0887965	-0.0317523	0.55003	0.0103835	0.890336	-0.0608827	0.406133	0.000332507	0.27913	-0.000317483	0.0192145	-0.000133415	0.292955	-0.00094494	0.00134277	0.00019917	0.0109501	-0.00135125	0.614025	0.00998811	0.864527	-0.143107	0.0165104
1263	1230528	HSPH1	0.133907	0.133626	0.221647	0.0139578	-0.130939	0.307202	0.0785058	0.527577	-0.000978531	0.0601803	0.00013909	0.545195	0.000327541	0.127514	0.000643351	0.197921	0.000148524	0.262706	-0.0060769	0.180442	0.184613	0.0629715	0.117375	0.244659
1264	1300600	TMEM22	0.0258366	0.667221	-0.0358931	0.548534	-0.015997	0.849888	-0.082636	0.31743	0.000188955	0.587606	-8.87913e-05	0.566008	0.000289758	0.0438705	-0.0003278	0.329205	6.05256e-05	0.495052	0.00585228	0.0527913	-0.0582226	0.380359	0.0730951	0.277679
1265	3990220	FAT2	-0.0183278	0.55827	0.0478011	0.123097	0.0410315	0.343383	0.0466573	0.278719	-0.000360933	0.0469839	3.4043e-05	0.672794	4.74431e-05	0.520317	0.000331054	0.0580491	1.99071e-05	0.665467	0.00225475	0.1511	-0.0391203	0.256286	0.0404635	0.249302
1266	840470	SECTM1	0.0319438	0.33825	0.015248	0.646514	0.0934949	0.0448649	0.0436725	0.343142	0.000172192	0.374694	-5.18838e-05	0.545589	-0.000220647	0.00548627	-0.000239847	0.19778	-3.94354e-05	0.423746	-0.000281264	0.86734	0.00587949	0.873148	0.0387514	0.303167
1267	6770746	FXR1	-0.0468608	0.157786	-0.00523455	0.8752	-0.144492	0.00214407	-0.0997051	0.0301838	1.1647e-05	0.951924	-5.3081e-05	0.533908	0.000133046	0.0962201	0.000236398	0.202508	-2.48064e-06	0.959839	-4.05793e-05	0.980773	0.0370422	0.313779	-0.0165603	0.659608
1268	3360022	PPP2R5E	0.0282384	0.421338	0.00071397	0.98373	-0.058814	0.235573	-0.00852311	0.859935	-0.000173446	0.394423	0.000126178	0.162582	-4.99312e-05	0.55514	1.94102e-05	0.921302	0.000121114	0.0197122	-0.00195114	0.269876	0.0114753	0.767442	0.0355116	0.367649
1269	2570193	ST3GAL2	0.095915	0.0168936	0.0297259	0.461472	0.127925	0.0256677	0.180868	0.00114747	-7.11481e-05	0.760652	-0.000121648	0.239109	-8.94161e-05	0.356158	-5.81628e-05	0.795759	1.34042e-05	0.822036	-0.00151517	0.456414	0.0947684	0.0334093	-0.0260075	0.565779
1270	3060497	TMOD4	-0.00352887	0.90206	-0.0269387	0.333203	-0.00191724	0.96	-0.00536906	0.890423	0.000116118	0.483632	8.21189e-05	0.2655	1.42105e-05	0.831209	-0.000103569	0.516092	-6.92544e-05	0.0974754	-8.28897e-05	0.953393	-0.0180558	0.562244	0.0360521	0.259651
1271	4220369	RDH8	0.0101136	0.775803	-0.00416569	0.906192	0.0226511	0.64412	0.00814337	0.868196	-5.70757e-05	0.782598	4.00254e-05	0.66145	5.086e-05	0.546671	-0.000273945	0.166471	5.61842e-05	0.284188	0.000575112	0.748784	-0.0152352	0.696878	0.0299141	0.458269
1272	20609	FOLH1	0.00477363	0.875279	0.0389545	0.186595	0.0629317	0.118102	0.049252	0.23429	5.67912e-05	0.747035	5.37291e-05	0.492658	-0.000126541	0.0698225	0.000152686	0.366411	1.71655e-05	0.697317	-0.000250961	0.867376	0.0341281	0.301642	-0.0607884	0.0732233
1273	650463	TUBA8	-0.0249267	0.62976	0.000851443	0.986828	-0.0402287	0.580014	-0.0830701	0.244388	-8.35584e-05	0.780838	-0.000137024	0.303491	9.36253e-06	0.939398	0.000241818	0.402602	8.653e-05	0.257156	0.00338451	0.194048	-0.0713602	0.211901	-0.00625473	0.914212
1274	5550672	OPLAH	-0.0120281	0.668215	0.0174519	0.517707	0.0638567	0.0847115	0.0129902	0.731715	-9.57505e-05	0.553368	4.89248e-05	0.497758	-6.03528e-05	0.349236	-0.000196059	0.208917	-1.31556e-05	0.746027	-0.00107034	0.436182	0.0353774	0.244388	-0.0109863	0.723768
1275	5820348	OPLAH	0.0657984	0.258271	0.0382918	0.512665	0.0690983	0.406868	0.16711	0.0379188	-7.438e-05	0.825968	6.88751e-05	0.645973	-0.000283968	0.0432533	-0.000666793	0.0407923	-0.000148284	0.0857731	-0.0065892	0.0252301	0.141863	0.0281081	-0.0655718	0.3162
1276	4220204	NALP14	0.0234556	0.408431	-0.0104819	0.702493	-0.0165355	0.659473	0.0324442	0.400565	-5.37597e-05	0.742904	-1.46121e-05	0.84164	5.13814e-05	0.423424	0.000105427	0.504081	2.26125e-05	0.5806	-0.001705	0.22191	0.0612753	0.0471625	-0.0355639	0.259214
1277	3290209	LOC150383	0.00878485	0.783355	-0.0108545	0.732909	0.0367812	0.408469	0.0355833	0.421101	-0.000183142	0.324755	5.35277e-05	0.515676	-1.84274e-05	0.805674	0.000305461	0.0865599	3.34487e-05	0.477014	6.67593e-05	0.966921	-0.035159	0.319293	0.0391875	0.275256
1278	6180162	LOC150383	-0.0400207	0.228968	-0.0335182	0.309791	0.0176541	0.699724	-0.0259176	0.573829	-2.19311e-05	0.90997	8.47403e-05	0.323101	1.17474e-06	0.987846	-0.00013934	0.452103	-3.4526e-06	0.94361	0.00148516	0.374914	-0.0106741	0.771119	-0.0111171	0.766743
1279	4210091	PCDHGA6	-0.0216651	0.420647	-0.0109315	0.678543	-0.057258	0.118511	-0.0341499	0.352947	-1.12549e-05	0.94229	-4.62408e-05	0.50467	-3.97988e-05	0.524109	7.70013e-05	0.607724	3.7602e-05	0.337995	-0.000727381	0.586059	0.0281428	0.33992	-0.0350937	0.241304
1280	4730609	SLCO5A1	0.0256594	0.338172	0.0664631	0.0111237	0.082506	0.0203664	0.0150437	0.682088	-0.000131143	0.40001	0.000169152	0.0142992	-0.000108352	0.0787178	6.74072e-05	0.650683	1.196e-05	0.759129	-0.0013847	0.299497	0.01387	0.63457	-0.00194884	0.94843
1281	6250576	FLJ36874	0.0731607	0.127268	0.1915	7.21852e-05	0.0716986	0.297279	0.0474088	0.475155	-0.000662056	0.0176037	-4.28945e-05	0.728515	0.000135937	0.241073	0.000539746	0.0446259	9.3986e-05	0.18666	0.00121237	0.617514	0.0372035	0.48495	-0.0251675	0.640921
1282	940048	ZNF599	-0.0911385	0.00749944	-0.0239228	0.477825	-0.0392767	0.407123	-0.0263259	0.572769	0.000172438	0.382155	2.72315e-05	0.756122	-0.000157379	0.0528407	0.000301224	0.11364	-0.00010561	0.0353648	-0.00209556	0.219376	-0.026058	0.487075	-0.00483189	0.899176
1283	7040114	BAI3	-0.0386943	0.178952	0.0318047	0.259012	-0.00235501	0.95089	-0.00937479	0.813188	0.000154679	0.357055	-3.70402e-05	0.618118	5.66221e-06	0.930714	-8.30537e-05	0.603664	-5.15439e-05	0.217087	0.00165638	0.248193	0.0178708	0.570321	-0.0309131	0.339985
1284	1300605	ELOVL3	-0.014416	0.654285	-0.040076	0.207008	-0.0321712	0.461914	-0.0283427	0.523612	0.000329058	0.0793172	5.5186e-05	0.506043	-7.27525e-05	0.327433	-0.000428938	0.0166722	3.25541e-05	0.489265	-0.00175888	0.275708	0.0332574	0.347027	-0.0866583	0.0168281
1285	4540010	C20orf103	-0.00224181	0.981804	-0.0763904	0.440841	-0.277164	0.0500776	-0.298692	0.028527	0.000372253	0.515135	-0.000305348	0.228271	3.718e-05	0.87509	-0.000536075	0.3303	5.39957e-05	0.711183	-0.0114634	0.0213405	0.10302	0.346024	-0.246876	0.0254073
1286	5090201	KLHL20	0.0576949	0.191814	0.0122385	0.782617	-0.0297761	0.634931	-0.0279661	0.647747	-1.82822e-05	0.943331	-7.35047e-05	0.518013	0.000273974	0.0101238	0.00035011	0.15668	6.86027e-05	0.295647	-0.000628899	0.778915	-0.024787	0.612791	-0.0291185	0.560158
1287	1260176	ZNF135	0.0350367	0.352083	-0.0392451	0.280557	0.0768361	0.122722	0.0704798	0.16731	0.000322088	0.138498	0.000145244	0.133669	-0.000180798	0.037388	0.000395528	0.0587534	-0.00017173	0.00168039	-0.00549259	0.00305281	-0.027347	0.502789	0.0693406	0.0978417
1288	7380243	RIN3	-0.0970046	0.0945896	-0.129232	0.0265203	-0.0762882	0.352846	-0.0866	0.28266	0.000925482	0.00622456	-0.000189697	0.204165	-0.000351202	0.0112572	-0.000768441	0.0177516	-4.8009e-05	0.576778	7.17397e-06	0.998057	0.030063	0.64038	-0.0601194	0.360027
1289	5690678	SCP2	-0.0285708	0.668969	0.00593623	0.929456	0.000408012	0.99659	-0.0528844	0.566663	-0.000147066	0.704801	-7.76915e-05	0.651579	0.000136297	0.399067	0.00043542	0.244663	5.00709e-05	0.613313	0.00405742	0.22968	-0.00479682	0.948388	0.0485029	0.518632
1290	1820110	SESN3	-0.123475	0.0186136	-0.0176489	0.738223	-0.0484583	0.51522	-0.0257246	0.724374	0.000510452	0.0953779	3.86357e-05	0.774731	-6.43139e-05	0.610208	0.000409061	0.163009	-0.000180247	0.0207572	0.00345371	0.195867	0.0849868	0.144428	-0.0348729	0.55892
1291	3800600	C14orf24	0.270726	0.000696626	0.306216	0.000140519	0.221151	0.0535874	0.269795	0.0148338	-0.00126165	0.00661279	-0.000113219	0.581891	0.000509706	0.00816516	0.000978093	0.0287078	0.000238265	0.0444053	0.000421287	0.917078	-0.0299133	0.735973	0.0212231	0.813472
1292	670050	MOG	0.0044628	0.87875	0.0111233	0.692215	0.00240625	0.950293	0.0239387	0.544055	-8.79794e-05	0.601319	1.11838e-05	0.881738	-7.23172e-05	0.283925	5.28422e-05	0.745226	3.87489e-05	0.360773	-0.000783833	0.584313	0.0184896	0.559095	-0.00509976	0.87494
1293	6380092	CCDC74A	-0.0131856	0.649532	0.00645164	0.818246	-0.0125164	0.745675	-0.00930952	0.813118	5.81277e-05	0.728335	2.03797e-05	0.785002	8.47607e-05	0.202155	-0.000180589	0.263332	-2.79333e-05	0.506163	0.00405043	0.00455138	-0.0401087	0.203727	0.0251028	0.435813
1294	2630152	TNNI1	0.0259433	0.332002	0.0308565	0.238188	-0.0374454	0.291668	-0.0623411	0.090516	-5.80666e-06	0.970297	-2.49264e-05	0.717963	0.000116377	0.054377	-0.000126408	0.394994	-1.55695e-05	0.688072	0.00125622	0.345513	0.0504607	0.0843853	-0.109799	0.000261188
1295	2470598	RFC3	-0.0782124	0.126729	-0.109254	0.0338154	-0.110974	0.128922	-0.113128	0.110865	0.000302503	0.309972	-0.000260467	0.0481669	0.000143764	0.244532	-0.000286873	0.31686	7.29751e-05	0.337025	0.00206883	0.42535	-0.00930718	0.869903	0.00561831	0.922525
1296	5550019	ZNF142	0.10913	0.0116457	0.0792912	0.0682178	0.0899306	0.146238	0.169454	0.00465688	-0.000196099	0.435501	-0.00011277	0.311827	0.000412329	7.40027e-05	-4.54773e-05	0.851034	0.000109938	0.086371	0.00443739	0.0426288	-0.022764	0.635579	0.0384369	0.428707
1297	1170044	SGTA	0.0437019	0.346892	-0.0170929	0.714413	0.0297593	0.651362	0.113042	0.0798317	1.59288e-05	0.953106	-9.57396e-05	0.42317	0.00010438	0.349876	-2.57774e-05	0.920913	6.18177e-06	0.9286	0.000472524	0.841427	0.0127656	0.80434	-0.0719262	0.172799
1298	2360386	ALDH7A1	-0.089893	0.0931275	-0.0718399	0.176075	-0.0267049	0.717696	-0.0620854	0.400114	0.000294855	0.343477	-7.50789e-05	0.585838	-0.000157741	0.212765	6.19871e-06	0.983433	-0.000127543	0.105916	-0.00297343	0.269824	0.0512375	0.384389	-0.106681	0.0773244
1299	3390376	MANBAL	-0.0429122	0.236472	-0.0121011	0.739887	-0.0146372	0.776543	0.0505439	0.315152	0.00017337	0.411631	-5.57031e-07	0.995236	1.13082e-05	0.896755	0.000127014	0.530851	-4.63275e-05	0.389242	0.00158677	0.388532	-0.123894	0.00206768	0.0333379	0.416277
1300	6060711	MANBAL	0.0141247	0.653506	0.0162253	0.59877	0.100236	0.0197996	0.0910648	0.0337507	-0.000113118	0.533808	7.41125e-06	0.927026	-5.23646e-05	0.480312	0.00010558	0.547434	-2.62948e-05	0.568425	-0.000979513	0.531228	-0.0410829	0.23294	0.0897858	0.0105044
1301	5490132	OR8U9	-0.096793	0.00357317	-0.0916757	0.0051725	-0.0521791	0.250717	-0.0917894	0.0442834	-0.000136324	0.479747	5.58152e-05	0.513849	-6.88606e-05	0.378974	-0.00030756	0.0966515	-2.92533e-05	0.549095	-0.0028329	0.0889658	0.00692794	0.849202	-0.0174225	0.641202
1302	6370348	ZNF507	-0.184864	5.92821e-05	-0.163723	0.000386017	-0.131461	0.0450561	-0.124527	0.0499347	0.000616523	0.0210955	0.000111021	0.348822	-7.24523e-05	0.515169	0.000280306	0.276874	-0.000181423	0.00783674	-0.00281672	0.225755	0.00253679	0.960336	0.00937902	0.856196
1303	130541	DSCAM	-0.03937	0.24246	0.042721	0.198778	0.0661224	0.146953	0.0306005	0.509175	-0.000354698	0.0704256	8.97337e-05	0.30092	-5.6937e-05	0.471387	-7.00686e-05	0.70855	1.80733e-05	0.714866	-0.000232526	0.890756	-0.034465	0.349991	0.0429651	0.259739
1304	4830129	CLEC10A	-0.132528	0.13532	-0.134547	0.131983	-0.190235	0.134318	-0.156837	0.20285	-0.000256941	0.618663	-5.63646e-05	0.805604	-0.000121399	0.566075	-0.000310203	0.532057	-5.59739e-06	0.966011	0.0041183	0.359197	-0.0340368	0.730113	-0.135214	0.173659
1305	3400019	MTHFD2L	-0.140976	0.00445733	-0.0846494	0.0894725	-0.151615	0.0316345	-0.238189	0.000531754	-0.000143552	0.618965	-0.000112879	0.376086	3.60376e-05	0.763159	0.000668075	0.0159762	4.26391e-05	0.562493	-0.00397452	0.114176	0.0596878	0.277699	-0.118243	0.0351389
1306	540332	FLJ14981	0.0271471	0.497655	0.0198215	0.623719	0.159106	0.00554151	-0.0123336	0.824664	0.000276318	0.236412	8.98888e-05	0.382753	-0.000227193	0.0188996	-0.00058311	0.00925746	-2.87462e-05	0.629058	-0.000857025	0.673657	0.0180546	0.684825	-0.0233432	0.607032
1307	6980288	OR5B21	0.0515355	0.11741	0.0542959	0.0935218	0.0448597	0.320634	-0.00408386	0.927757	0.000188712	0.32149	-7.46174e-05	0.37881	4.81898e-05	0.531033	0.000121675	0.507547	1.3723e-05	0.775618	0.00224345	0.170978	-0.0119746	0.740363	0.00660889	0.857045
1308	4670328	LONRF3	0.0267392	0.388225	0.0114192	0.706293	0.021911	0.594353	0.0068319	0.872764	1.87721e-05	0.917239	-3.29984e-05	0.679867	6.65689e-05	0.342378	-0.000291311	0.0907275	5.59897e-05	0.212743	0.000912484	0.554167	-0.0288857	0.393811	0.040124	0.24937
1309	6330468	OSBPL2	0.0217543	0.544733	-0.00624058	0.862899	0.0185865	0.715601	0.0489776	0.3273	0.000115092	0.582986	0.000111237	0.229024	-0.000140418	0.101691	-0.000464749	0.0205345	7.62405e-05	0.152564	-0.000991573	0.587321	0.0368501	0.355568	-0.0313451	0.441446
1310	5310008	BRMS1L	0.0813495	0.181037	0.136869	0.0250485	0.10016	0.245224	0.168104	0.0463647	-0.000784932	0.0267384	-2.94139e-05	0.85091	0.000507813	0.000509606	-0.000246139	0.468998	0.000156647	0.0826465	0.00147539	0.632742	0.0438977	0.515015	0.0286185	0.677911
1311	6250296	FAM53C	0.0592312	0.23881	-0.0494976	0.328121	-0.0132124	0.853995	0.00761783	0.913037	-2.75536e-05	0.925015	0.000137498	0.287798	-0.000185839	0.126302	-0.000431662	0.12503	1.37299e-05	0.854187	-0.000531222	0.835099	0.0374254	0.502459	0.00802007	0.887916
1312	830537	CHODL	0.0319756	0.305945	-0.0166086	0.592871	0.0178161	0.683291	0.0621337	0.149132	8.83755e-05	0.625588	3.78553e-05	0.638497	3.57891e-05	0.625122	4.32877e-05	0.804027	2.5372e-05	0.580217	0.00265429	0.0901156	-0.0684164	0.0474648	0.0246985	0.478698
1313	5720458	RARRES3	0.0172513	0.758953	0.073173	0.197514	0.00467102	0.953859	0.0230747	0.768101	-0.000364704	0.266024	6.33486e-05	0.661621	0.000189968	0.161025	-0.000625668	0.0468007	0.000125595	0.132697	0.00510288	0.0741554	0.0175939	0.778374	0.00642912	0.919491
1314	10563	SLC2A4RG	-0.0505063	0.169785	-0.0351607	0.340158	-0.0232008	0.657708	-0.0342137	0.500625	0.000447886	0.0360572	0.000154919	0.102082	3.9734e-05	0.653512	-0.000454216	0.0273726	-2.03719e-05	0.70841	0.00388096	0.0367298	0.0064268	0.874763	0.0118258	0.774617
1315	5420564	OR2S2	0.0240107	0.435944	-0.00934041	0.757247	0.0118013	0.777095	0.0536292	0.204913	0.000168689	0.345364	-7.95662e-05	0.31671	1.14545e-05	0.871248	7.73081e-06	0.964072	-4.29955e-06	0.92364	0.00105584	0.491022	0.0117975	0.726932	-0.0296163	0.389611
1316	4880020	CBX3	-0.0764403	0.0604433	-0.0752551	0.0630556	-0.0726167	0.196353	-0.191455	0.000664425	0.000265986	0.261898	-7.63889e-05	0.466059	-0.000210004	0.0294073	0.000471107	0.0379311	-0.000142081	0.0180343	-0.00216698	0.291905	-0.00786871	0.860696	0.00630734	0.891264
1317	2490338	AMH	0.02673	0.342795	0.0377455	0.167469	-0.0506494	0.174593	-0.0521649	0.175145	2.52346e-05	0.877158	-6.88176e-05	0.343538	0.000100818	0.113726	-0.000139055	0.374768	2.54347e-05	0.532125	-5.56939e-05	0.96807	0.0289847	0.345058	-0.00781314	0.803528
1318	4730543	C16orf57	-0.0231299	0.632321	-0.0237473	0.625376	-0.00119813	0.98608	0.0335874	0.616932	5.2253e-05	0.852892	0.000122977	0.322736	-0.000198429	0.0883072	-0.000576168	0.0330049	5.62141e-05	0.433762	0.00178423	0.467842	-0.0144434	0.787701	-0.0303302	0.580546
1319	6590253	CREG1	-0.153186	0.0670468	-0.0976689	0.247643	-0.0275934	0.818767	-0.230369	0.047804	2.53859e-05	0.958472	-0.000211694	0.326458	-0.000307558	0.12518	-0.00010501	0.822593	-7.38123e-05	0.55202	-0.00259627	0.540798	-0.126136	0.175439	-0.111011	0.237941
1320	5050209	DECR1	0.0297369	0.538774	-0.103042	0.0344731	-0.0453958	0.510767	-0.0646685	0.336332	0.000175891	0.532865	-7.26568e-05	0.559568	-6.14816e-05	0.597115	-6.53643e-05	0.809071	-7.64158e-05	0.287542	-0.000204174	0.933827	-0.0159253	0.766948	-0.0172347	0.753035
1321	2120709	BZRAP1	0.0382663	0.471808	0.0731941	0.169799	0.0250798	0.740226	0.198921	0.00682988	-1.32818e-05	0.965721	-0.000188385	0.169105	9.45797e-05	0.458648	-0.000601581	0.0431679	0.000282391	0.000335926	0.00617852	0.0215375	-0.132128	0.0250338	0.109693	0.0663399
1322	6420341	HCTSL-s	-0.046188	0.102861	-0.0119435	0.665341	0.0410215	0.274849	0.00412539	0.915069	-0.000109074	0.506954	2.21296e-06	0.97579	-1.60958e-05	0.806283	-0.000263311	0.094211	4.84525e-05	0.240612	-0.000696642	0.620871	0.0465715	0.130184	-0.0322033	0.311053
1323	10403	PTPRS	0.0254196	0.391009	0.0469451	0.110504	0.0195035	0.637501	0.00822318	0.840024	-0.0002	0.244175	1.35834e-05	0.858774	5.69949e-06	0.935306	0.000262439	0.1129	6.25921e-05	0.151227	-0.000274088	0.85367	-0.00760107	0.816136	0.0198972	0.548186
1324	6110379	C10orf7	-0.0435779	0.118703	-0.0637789	0.0220493	-0.0298815	0.442915	-0.0366679	0.342286	1.06162e-06	0.994789	-3.85724e-06	0.9572	0.00012891	0.0527309	0.000313508	0.0442996	5.09572e-05	0.21729	0.0032164	0.0227407	-0.073513	0.0171	0.0061814	0.844964
1325	5360133	FBXW4	0.210921	1.56488e-05	0.188259	0.000129093	0.218838	0.00168224	0.108032	0.111275	-0.000274768	0.334248	0.000153655	0.221383	0.000225103	0.0557759	-3.99881e-05	0.883597	0.000114507	0.114453	0.00135465	0.585074	-0.00419438	0.938336	0.0344845	0.532961
1326	130270	CDH15	0.024472	0.453116	0.000684051	0.982849	-0.0132118	0.760111	-0.0456235	0.308419	0.000124942	0.510379	7.83283e-05	0.351975	-9.2279e-05	0.211086	-7.19909e-05	0.691307	5.7298e-05	0.225206	-0.00170553	0.292342	0.0245236	0.491109	0.00963349	0.792172
1327	2190008	TNFRSF12A	-0.200014	0.00259017	-0.182784	0.00625854	-0.0740526	0.433691	0.00294089	0.974637	-1.53862e-06	0.996832	-0.00026071	0.127416	2.3995e-05	0.879475	-0.000499512	0.178046	1.24365e-06	0.989926	-0.00719999	0.0330076	0.0544112	0.460911	0.0397695	0.596381
1328	6620612	RAMP2	0.0155809	0.628757	-0.0341895	0.277334	-0.0226461	0.604943	0.0104551	0.811558	0.000153867	0.408279	-4.95999e-05	0.54949	-3.78662e-05	0.616751	6.40729e-06	0.971547	-5.6967e-05	0.226702	0.00122033	0.445055	-0.0255048	0.468789	0.00167202	0.962847
1329	4780164	CDH7	0.0132914	0.670981	0.0603481	0.0482338	0.0928103	0.0277952	0.0217437	0.611081	-0.000361123	0.0459086	0.000133281	0.0984608	2.87159e-05	0.68866	-0.00020265	0.244914	1.99373e-05	0.660731	0.00275456	0.0754017	-0.0531739	0.120362	-0.00515841	0.882217
1330	20670	HPCAL1	0.10968	0.0506778	0.0760935	0.179678	0.205724	0.0107186	0.172122	0.0276299	-0.000127339	0.697367	0.000157535	0.275526	-0.00033031	0.0147502	0.000289107	0.357577	-2.93275e-05	0.725133	-0.00196954	0.490088	-0.0431089	0.48972	-0.0277833	0.66207
1331	1820148	HPCAL1	0.0487626	0.329799	0.0146985	0.770083	0.102975	0.147075	0.015818	0.820563	-8.73598e-05	0.764922	-0.000142757	0.268454	4.53211e-05	0.701253	0.000520655	0.0623459	8.44661e-05	0.254148	0.00187421	0.460682	0.0153708	0.782189	0.00227793	0.967791
1332	4290725	PLEKHG4	-0.00950903	0.864168	0.0545641	0.328987	0.0525293	0.50973	-0.0993097	0.196653	0.000682917	0.0345606	0.000321607	0.0246995	-0.000207086	0.123095	0.000124456	0.689387	-0.000297504	0.000308489	-0.0121825	1.48362e-05	-0.0194145	0.753099	-0.0605953	0.332355
1333	6020682	PCLKC	-0.0691465	0.00581272	-0.0480556	0.0475704	-0.00496523	0.880997	0.0189649	0.577349	0.000100441	0.488222	5.97135e-05	0.35453	-3.0563e-05	0.59733	-1.32643e-05	0.924157	-4.90763e-06	0.892811	-0.00183193	0.138499	-0.0447825	0.0995076	0.0214029	0.443492
1334	3800711	RDHE2	0.0264848	0.336288	0.0499823	0.0591276	0.12441	0.000621903	-0.0337708	0.363941	0.000111983	0.480027	-0.000103016	0.145847	-5.08169e-05	0.421466	4.61837e-05	0.762986	4.95139e-05	0.21408	0.00123524	0.359911	0.0380383	0.202329	-0.0591264	0.0526286
1335	7100594	LASS5	0.0563198	0.210667	0.0647872	0.15403	0.0887112	0.170014	0.176318	0.00487709	-0.000408938	0.119154	4.86753e-05	0.67439	0.000202671	0.0616051	0.000190305	0.449967	0.000103302	0.122237	0.00151926	0.50641	0.0130502	0.794238	0.0686539	0.17718
1336	6510403	ENPP5	0.0712284	0.161223	-0.0661901	0.189189	-0.0644359	0.363574	-0.0265186	0.70405	-6.17311e-07	0.998328	-7.10475e-05	0.58734	-0.00010019	0.406559	-0.000478933	0.0917465	0.000365226	1.05996e-06	0.00221031	0.385761	-0.0748781	0.181504	-0.00684779	0.904147
1337	1240520	HPS5	-0.0596163	0.204244	-0.00333169	0.943328	-0.115899	0.0766473	-0.0598096	0.357366	0.000262979	0.336271	1.32083e-05	0.91297	-0.000134318	0.229525	-0.00017877	0.495076	-0.000115544	0.0961803	-0.000855541	0.718846	0.0182196	0.725305	0.101389	0.0567814
1338	2000156	HPS5	0.0819195	0.0629945	0.124835	0.00480732	0.0481024	0.439982	0.226573	0.000212277	-0.00058178	0.023522	3.02598e-05	0.789487	5.9791e-05	0.572618	0.000520573	0.0344684	3.592e-05	0.583028	-0.000651967	0.771031	0.00620113	0.898958	0.0165319	0.741499
1339	2060020	CRBN	0.0725594	0.125274	-0.0827922	0.0816319	-0.141038	0.0372454	-0.12753	0.0513579	-0.000294819	0.283803	-0.000156397	0.199573	0.000188633	0.0987152	0.00049186	0.0635001	3.93211e-05	0.575262	0.00380048	0.112398	0.0866489	0.0990339	-0.0410511	0.440315
1340	990468	CCBP2	0.0358713	0.206066	0.00299251	0.914393	-0.0480889	0.2105	0.0580594	0.136264	-1.09134e-05	0.947147	5.43567e-06	0.940764	-5.21985e-05	0.422523	-7.21053e-05	0.648082	-3.1765e-05	0.441933	0.00282799	0.0452517	-0.00642681	0.83633	0.0357681	0.259287
1341	130307	CCNC	-0.014129	0.739417	-0.0743087	0.0798853	-0.0979169	0.0971686	-0.0792018	0.178292	0.000134504	0.587064	-0.000146466	0.180335	0.000115864	0.252208	0.000309713	0.191128	-8.66568e-06	0.890359	-0.00362051	0.0928566	0.0349955	0.455517	-0.0501441	0.299831
1342	7210121	CCNC	0.00337672	0.966727	-0.0716827	0.378134	0.0560931	0.628429	-0.184952	0.098401	-0.000188779	0.688212	-0.00027405	0.188609	0.000228514	0.243455	0.00129258	0.00437134	4.30701e-05	0.719853	0.00263184	0.520368	-0.020512	0.819386	0.0192226	0.832836
1343	2710064	UBA2	0.0574136	0.0637207	0.012216	0.68678	-0.00375476	0.927264	0.0182546	0.667728	1.85603e-05	0.918012	6.46762e-06	0.935437	5.20775e-05	0.463422	9.59152e-06	0.955545	-8.8138e-06	0.844947	-0.00255799	0.0976186	0.0256513	0.447444	-0.0367375	0.292078
1344	1110685	ENSA	-0.075626	0.241381	-0.0696252	0.284739	-0.113506	0.216263	-0.247139	0.00595904	-0.00033217	0.378116	-0.000228044	0.169652	0.000163617	0.292913	0.000548702	0.128305	0.000265632	0.00565093	0.00651105	0.0479018	-0.0041612	0.953718	-0.0488761	0.506825
1345	5340703	ENSA	0.0148825	0.664633	-0.00999569	0.76213	0.00538165	0.905476	-0.0212836	0.646362	2.92144e-05	0.882477	-4.04341e-05	0.647049	5.54344e-05	0.480535	-2.09092e-05	0.912777	-7.16913e-05	0.148559	0.000987703	0.556974	-0.000402668	0.991365	0.0385231	0.311003
1346	6220209	NDUFS4	-0.0482038	0.170869	-0.0453344	0.198876	-0.13225	0.00802027	-0.110038	0.02384	0.000101376	0.620454	-0.000174231	0.0543396	-6.00706e-06	0.943547	0.000356158	0.0704087	-3.94917e-05	0.449455	-0.00278773	0.117798	0.0402187	0.302196	-0.0237168	0.550874
1347	610187	TRPM7	0.0386511	0.275466	0.0557487	0.113175	0.0673318	0.175322	-0.0194166	0.689704	3.21897e-05	0.875436	2.64048e-05	0.772087	-7.69166e-05	0.366092	4.29749e-05	0.828302	7.99111e-05	0.126724	-0.000491938	0.782251	0.0481207	0.218127	-0.00781989	0.843962
1348	5690673	RBMX	-0.0492672	0.098749	-0.00609592	0.83964	-0.102882	0.0157868	-0.0836049	0.0441385	-9.38965e-05	0.589768	3.29598e-05	0.667606	3.85149e-05	0.593484	0.000391938	0.0188756	4.66548e-06	0.916295	0.000593547	0.69625	0.0378715	0.253375	-0.0169655	0.617602
1349	6220367	EPRS	0.00501638	0.910638	-0.087162	0.0514053	-0.0823197	0.194049	-0.127344	0.0391246	0.000562358	0.0303332	-8.63478e-06	0.940176	1.28064e-05	0.905159	0.000200101	0.423505	-0.000127838	0.053468	0.0015094	0.503868	-0.00465483	0.925074	-0.0315536	0.530256
1350	5820379	LCE2D	0.0247552	0.407335	0.0465584	0.107354	0.0911392	0.0220452	0.0610329	0.132161	-0.000264411	0.124618	7.9797e-05	0.299596	-0.000122354	0.0736057	0.000213206	0.199779	9.05862e-05	0.0361885	-0.00124068	0.398429	-0.0222714	0.493355	0.0122636	0.711336
1351	6620386	CASP6	0.0326829	0.466682	-0.0521223	0.234384	-0.0367786	0.54629	-0.0871276	0.153728	0.000244311	0.345957	0.000136314	0.237713	-0.000163186	0.121763	-0.000161873	0.517775	5.61288e-05	0.39262	-0.00533671	0.0165049	0.0778748	0.112266	-0.0823013	0.0998155
1352	3310717	RECQL5	0.0374943	0.213738	0.00514605	0.86206	0.00519497	0.89886	0.00297539	0.9426	9.03897e-05	0.605389	3.69447e-05	0.634096	-4.82702e-06	0.945425	8.64935e-05	0.606503	3.1953e-06	0.942326	0.00265357	0.0780053	-0.00540669	0.869815	-0.0270832	0.423558
1353	2190025	PGAP1	0.0186272	0.735895	-0.0725218	0.191795	-0.00793715	0.919845	-0.0898436	0.240711	0.000447319	0.164018	0.00010021	0.480768	0.000107233	0.421017	-8.42072e-05	0.785258	-0.000192204	0.0190795	-0.00375903	0.179522	0.0937583	0.126123	0.0133614	0.83035
1354	3890561	NTS	0.0411396	0.206178	0.00989304	0.757342	-0.00558161	0.900547	-0.00826335	0.852867	-5.30348e-05	0.778117	1.57366e-05	0.851128	8.8654e-05	0.242948	-7.20354e-05	0.69152	1.61179e-05	0.734805	-0.00145067	0.370586	-0.0197841	0.579887	0.0357301	0.324536
1355	5420672	DUSP13	-0.012375	0.652522	-0.00923512	0.728235	-0.0174357	0.632997	-0.0293459	0.431529	-2.71238e-05	0.863997	9.42163e-05	0.183421	-0.000112045	0.0725471	-0.000329519	0.03122	-9.03402e-06	0.819798	-0.00132169	0.32759	-0.0109225	0.71508	0.0336128	0.269875
1356	5310286	HRH1	-0.0147506	0.62292	0.016375	0.571172	-0.0522941	0.186962	0.0096017	0.813256	0.000365321	0.0344181	-0.000123619	0.109736	1.40506e-05	0.835963	1.13632e-05	0.945713	-2.23121e-05	0.605459	0.001757	0.232028	0.029895	0.359113	-0.00545369	0.869607
1357	4390673	GUCY1A3	-0.125307	0.284036	-0.0784774	0.506102	-0.230729	0.17042	-0.337657	0.0377564	-0.00155984	0.0219901	-0.000203193	0.500507	1.08368e-05	0.969223	0.00103856	0.112797	0.000160688	0.354482	0.00162322	0.784331	-0.13523	0.298758	0.063934	0.626717
1358	780438	PPP1R1B	0.0372822	0.233713	0.0400762	0.199811	0.0655654	0.13141	0.0251679	0.561499	-0.000230407	0.206768	0.000123335	0.125845	-0.000109489	0.142243	5.26968e-06	0.975924	-3.0264e-05	0.513596	-0.00139833	0.378374	0.0150849	0.662374	0.0554502	0.119785
1359	5390204	PPP1R1B	-0.0122784	0.671991	0.0575118	0.0425689	-0.0597815	0.128684	-0.0297808	0.451825	4.34819e-05	0.795165	6.1541e-05	0.410107	-2.23795e-05	0.738562	0.000163686	0.311197	4.7584e-05	0.25971	-0.000633971	0.659065	-0.00639054	0.840471	0.0110926	0.730922
1360	4590008	TSC22D1	-0.0168945	0.853516	-0.020589	0.823453	-0.0377055	0.774685	-0.304703	0.0164373	-0.000784547	0.140653	-0.000495973	0.0355642	4.85335e-05	0.825411	0.00085704	0.0945361	1.22831e-05	0.927903	0.0108787	0.0189614	-0.147601	0.147047	0.100384	0.328816
1361	5420497	TSC22D1	-0.0101145	0.763178	-0.056885	0.0864343	-0.02506	0.586026	-0.0440145	0.340121	0.000131579	0.499744	-3.46406e-05	0.688389	1.58044e-05	0.842056	-0.000304821	0.103279	0.000113981	0.0210298	0.00203484	0.227249	-0.0127043	0.730213	-0.0267112	0.480007
1362	4120348	FRG1	-0.0246996	0.639492	-0.0978038	0.0643277	-0.131657	0.0744645	-0.0865952	0.236807	-0.000306644	0.318964	-0.00012827	0.344495	0.000335237	0.00792211	-0.000188238	0.522404	0.000189596	0.0153494	-0.00148092	0.580953	0.0854492	0.143083	-0.0115105	0.848422
1363	4210347	IBSP	0.0207971	0.517574	-0.0115814	0.71363	0.0267871	0.542455	0.011739	0.789067	-0.000364276	0.0500774	6.5189e-05	0.430158	2.76837e-05	0.715855	-0.000237683	0.18481	8.64293e-05	0.066984	5.80714e-05	0.971085	0.0144722	0.680846	-0.00533643	0.881964
1364	6400072	SNRPN	-0.0938144	0.151453	-0.0992824	0.130021	-0.0846842	0.35552	-0.251285	0.0057064	-2.46239e-05	0.948585	0.0001545	0.358743	0.000182756	0.240864	8.4517e-05	0.816842	0.000130248	0.179033	-0.00273556	0.410918	0.0394704	0.585834	0.102448	0.169564
1365	2370524	TNFAIP6	1.08897	5.18843e-06	1.49713	5.41773e-10	0.671517	0.0510192	1.02587	0.00201398	-0.0032458	0.0196436	-0.000496577	0.420773	0.00112206	0.0496841	0.00190809	0.153732	0.000255649	0.470604	0.0238778	0.048786	-0.188125	0.479515	-0.137298	0.608298
1366	4860152	DEPDC2	0.040948	0.172387	0.026196	0.371015	0.0387815	0.330096	-0.0124859	0.761451	0.000123698	0.47836	-2.38708e-05	0.757644	4.47026e-05	0.51489	-0.00012489	0.453903	-7.85834e-05	0.0714903	6.7866e-05	0.96372	0.0330597	0.31202	0.0303778	0.367124
1367	160364	AGL	-0.0432855	0.161845	-0.0349512	0.240028	-0.0399083	0.328488	-0.0975126	0.0195974	0.000394323	0.026839	-0.000109532	0.168621	5.21757e-05	0.462808	-0.000249112	0.147616	9.35623e-06	0.834495	-0.00110844	0.464568	0.0506312	0.130817	-0.0405749	0.236472
1368	1470176	TUBB2B	0.0141281	0.719105	-0.0534491	0.172056	-0.0244304	0.657955	-0.0735766	0.174391	-5.15115e-05	0.821165	5.31544e-05	0.599735	3.87334e-05	0.67661	-0.000286787	0.191365	-2.60436e-05	0.65254	-0.00369648	0.0611245	0.0514487	0.23625	0.00483849	0.912272
1369	6350520	NEUROD1	-0.0446347	0.208387	0.00958254	0.783769	-0.0160952	0.737399	-0.0908621	0.0629515	0.000181789	0.378623	-1.23272e-05	0.892763	1.9306e-05	0.813778	-0.000219044	0.267294	6.12363e-05	0.237581	0.00140663	0.428136	0.0640707	0.0995605	-0.0705582	0.0771122
1370	2190386	LOC283755	-0.0104482	0.874661	0.0544378	0.410789	-0.0998097	0.285506	-0.0498805	0.585985	-0.000323918	0.399617	-0.000175169	0.305423	0.000124029	0.427246	0.000235832	0.524069	2.89038e-05	0.767056	0.00346381	0.298709	0.0175716	0.810741	0.0923834	0.212015
1371	4760538	LOC283755	-0.0138551	0.690186	0.000708309	0.983442	0.000532039	0.990938	-0.0477029	0.319016	-7.03456e-05	0.72799	-2.92412e-05	0.744282	3.41521e-05	0.667225	-7.36944e-05	0.703179	-3.78745e-06	0.940339	-0.00115919	0.503801	0.0197662	0.604028	-0.0219164	0.574056
1372	4050288	U2AF1	-0.00950263	0.867817	0.145569	0.0114737	0.121298	0.137525	0.142088	0.0737298	-0.000645619	0.0525216	5.54501e-05	0.70598	7.14573e-05	0.60281	0.000237842	0.456382	0.000168839	0.0465276	-0.00173395	0.550399	0.103428	0.103142	-0.0601499	0.352092
1373	3890356	LOX	0.00365367	0.918622	0.0314738	0.36097	-0.0787976	0.0952702	-0.0666037	0.168982	0.000413126	0.0447987	-1.61318e-05	0.860963	6.1604e-05	0.447635	-5.55769e-05	0.77994	-1.03668e-05	0.840588	-0.000711079	0.684895	0.0289037	0.456721	0.00309181	0.937778
1374	5890204	GPC4	0.0499681	0.196069	0.0689159	0.0748706	0.00236021	0.965284	0.0380059	0.479592	-1.5378e-05	0.94566	-0.000158303	0.111881	-9.44796e-05	0.299431	0.000547683	0.0110704	-1.26792e-05	0.824327	0.00273868	0.162224	-0.0604134	0.15841	-0.0421549	0.335051
1375	3140452	RTCD1	0.0631103	0.176061	0.0601531	0.199419	-0.0648553	0.325211	-0.0530049	0.413307	-0.000337431	0.21483	-7.35409e-05	0.539984	6.29473e-05	0.574372	0.000369528	0.15617	0.00016923	0.0145578	0.00173681	0.464163	0.0730886	0.157529	-0.0348972	0.510962
1376	2100441	QARS	0.0245029	0.469429	-0.00482291	0.88698	0.0780726	0.10436	0.0797509	0.0883753	0.00015417	0.433492	-4.39334e-05	0.614182	3.56578e-05	0.66247	4.68618e-05	0.804679	-0.000138157	0.00594041	-0.00200157	0.242593	-0.0678614	0.0704321	-0.0101953	0.789415
1377	2480202	SLC5A3	-0.0162179	0.601035	-0.0463433	0.121652	-0.04611	0.261382	0.0543535	0.195649	-1.02455e-05	0.954346	-4.82208e-05	0.545416	6.21e-05	0.386091	0.000315827	0.0669847	-2.18463e-05	0.627622	0.00161596	0.289647	-0.0460513	0.170716	0.0169338	0.623268
1378	1340544	ZNF333	0.0244703	0.588012	0.0538214	0.236805	-0.031045	0.628623	0.0802657	0.201772	9.23317e-05	0.726208	6.0272e-05	0.604098	6.46702e-06	0.952439	-0.000182414	0.469847	0.000136196	0.042395	-0.00117596	0.609238	0.01157	0.817592	0.0585429	0.254546
1379	4780326	KCNE1L	-0.0684916	0.0660265	-0.0258433	0.480837	0.0613363	0.227724	-0.0555462	0.276332	-0.000281311	0.192739	0.000103383	0.280739	-4.50457e-05	0.608139	-0.000104737	0.613991	1.26067e-05	0.817762	-0.000345849	0.852669	0.0172689	0.672128	0.0174862	0.675753
1380	2340639	ABT1	-0.0149416	0.610797	-0.0693334	0.0154624	0.0249167	0.529178	-0.0397827	0.320493	0.00015403	0.363389	-1.74487e-06	0.981606	-6.59505e-05	0.327097	-0.000102027	0.532803	-4.61452e-06	0.913729	0.00251578	0.0829676	-0.0355212	0.268647	-0.000687689	0.983177
1381	6760609	ANKRD26	0.00442018	0.918355	-0.00789916	0.855177	-0.0649159	0.288375	-0.0635126	0.287705	0.00039383	0.116608	0.000151361	0.172421	-8.69377e-05	0.402575	0.000146885	0.542386	-0.000130498	0.0414346	-0.00456336	0.0368709	0.0516439	0.279767	-0.0705009	0.148478
1382	840736	WDR42A	0.066061	0.144355	0.0638953	0.158327	0.0911999	0.15606	0.0789595	0.205962	6.01082e-05	0.819043	9.93335e-05	0.394003	-7.88163e-05	0.469391	0.000381593	0.131873	-8.35047e-05	0.212581	-0.00541406	0.0177722	0.0161274	0.747647	0.0173356	0.732947
1383	4590682	GALNT7	-0.0146004	0.616906	0.0162619	0.56438	0.0540895	0.163293	-0.010158	0.797196	-0.000103916	0.537157	-0.000111455	0.13737	7.01922e-05	0.300597	0.000228881	0.15852	-1.74277e-05	0.681565	-3.89463e-05	0.978391	0.0428513	0.175884	0.0250991	0.439285
1384	6650273	ZNF695	-0.00402536	0.884156	-0.00620489	0.81994	0.0361829	0.336394	-0.0274737	0.471374	0.000107016	0.50582	3.73708e-06	0.958165	-6.90934e-05	0.277078	-7.06516e-05	0.646034	3.25644e-05	0.419867	0.00170712	0.217159	-0.0456391	0.133071	0.0123461	0.690661
1385	7610349	SLITRK3	0.0278965	0.363678	-0.0302044	0.318898	0.00749767	0.859341	0.0214706	0.610598	-2.20103e-05	0.901447	6.21869e-05	0.432348	-0.000105261	0.14015	-9.65248e-05	0.573238	6.70847e-05	0.135028	-0.000101005	0.947397	0.0181805	0.590654	-0.024163	0.480067
1386	6900138	ASB1	0.0800481	0.213995	-0.0203278	0.754673	0.120005	0.194432	0.185467	0.0386438	0.000211881	0.572801	-8.45554e-05	0.610253	0.000267627	0.0842863	-8.53142e-05	0.812921	8.25719e-05	0.388183	-0.000501968	0.878172	-0.0866996	0.226206	0.000717214	0.992142
1387	6180470	PCDHGA7	-0.0322542	0.283817	-0.00200487	0.945597	0.0345713	0.386715	0.0401536	0.330766	-1.57487e-05	0.928325	-5.86259e-05	0.44994	3.96957e-05	0.56326	-0.000150712	0.367495	-1.19157e-05	0.785129	0.00161285	0.281215	0.00687075	0.834155	-0.00968412	0.774424
1388	7510228	PCDHGA7	0.0208592	0.516068	-0.0113884	0.714525	-0.0459429	0.279829	-0.00621356	0.887189	0.00042073	0.0236273	-8.09257e-05	0.328452	1.85221e-05	0.798794	-0.000165426	0.354344	-5.45713e-05	0.239363	0.0015754	0.319948	-0.0153652	0.660445	-0.019245	0.590442
1389	2000082	RTP3	2.95988e-05	0.999238	-0.00360535	0.904941	0.0303952	0.459654	-0.00725673	0.86432	-4.44034e-05	0.805276	6.00999e-05	0.452287	-1.44083e-05	0.837749	1.2293e-05	0.943142	-6.19073e-05	0.168059	-0.00168151	0.273927	-0.011272	0.73882	-0.00599125	0.862886
1390	7210142	ZNF306	0.0596528	0.0515919	0.00887014	0.766657	-0.000283607	0.994453	0.0151109	0.718144	-0.000276979	0.119272	0.000154969	0.049539	6.72441e-05	0.343613	-4.88697e-05	0.77421	0.00011154	0.0125514	-0.00241514	0.112908	-0.00696832	0.834458	0.0166053	0.62895
1391	2340373	RPL32	0.0163209	0.737762	-0.10707	0.0288598	-0.0571808	0.409353	-0.0751422	0.267587	-4.40406e-05	0.876838	0.000190076	0.130219	0.000131816	0.2559	-3.78142e-05	0.889572	1.8094e-05	0.802184	0.00173752	0.482381	0.0240635	0.656648	0.0383107	0.485698
1392	2350725	C9orf76	0.063355	0.151349	-0.0462756	0.28609	-0.0556985	0.358279	-0.1614	0.00741486	0.000340793	0.181855	-9.31288e-05	0.412238	-6.17557e-05	0.553975	3.65088e-05	0.882198	-5.94921e-05	0.358358	-0.000462754	0.833348	-0.0262302	0.587877	-0.0665226	0.177054
1393	7330187	PSMAL	-0.0353414	0.118735	-0.00156119	0.943961	-0.059242	0.051385	-0.0572557	0.0663376	0.000175767	0.182458	-0.000159347	0.00638719	5.06469e-05	0.32664	-8.89491e-05	0.480252	5.36769e-05	0.103207	-0.000455133	0.68685	0.102416	3.6738e-05	-0.0485556	0.0560493
1394	5130392	PAPD5	-0.0617738	0.424148	-0.122888	0.113637	-0.126826	0.251862	-0.0399736	0.708438	0.00014536	0.746252	-4.4157e-05	0.824456	0.000192425	0.302989	-0.00134316	0.00191988	0.000244721	0.0327844	-0.00182577	0.640537	0.0903207	0.292432	0.00991537	0.909177
1395	4210706	SCAND2	0.00890394	0.768416	-0.0247783	0.401672	-0.0031188	0.939507	-0.110634	0.0072019	0.000194494	0.265346	0.000126944	0.102645	-0.000129757	0.0672702	-7.52002e-05	0.655514	-4.27336e-06	0.922988	0.00232515	0.121037	-0.0226607	0.492908	0.043675	0.194713
1396	4760180	SCAND2	0.0285714	0.601996	-0.0948757	0.0840271	-0.0151524	0.844065	0.0619121	0.416699	-4.04197e-06	0.989918	0.000255594	0.0700752	-7.40908e-05	0.567368	-8.30292e-05	0.785882	2.65344e-05	0.743415	-0.00104398	0.707413	-0.0370434	0.541963	0.0926993	0.135509
1397	1010711	ZNF558	-0.0593526	0.230408	-0.0497994	0.319123	-0.17812	0.0120618	-0.148815	0.0307426	0.000455223	0.11484	-7.92584e-05	0.533634	-8.18658e-05	0.493697	-7.78513e-05	0.778677	-0.00012594	0.0869683	-0.00463495	0.0656307	0.0807255	0.142248	0.0191834	0.732654
1398	20594	RNASE8	-0.0111032	0.69625	-0.00601887	0.828768	-0.0359573	0.351847	-0.026674	0.492052	-0.000136512	0.406267	-3.72924e-05	0.610615	9.78918e-05	0.138528	0.0001246	0.431841	-4.32273e-06	0.917012	0.00235975	0.0944805	-0.0218528	0.482637	0.032221	0.309099
1399	2600309	MIP	-0.027378	0.361565	0.0143717	0.628453	-0.0307029	0.454243	-0.0509695	0.219936	4.95108e-06	0.97743	0.000109111	0.158491	1.92254e-05	0.780998	-0.000133922	0.422772	3.68816e-08	0.99933	0.000424927	0.778013	0.0167171	0.613082	-0.0104124	0.75805
1400	730524	FAM71B	-0.000400519	0.987353	0.0120434	0.630319	-0.0189318	0.584806	0.021705	0.534753	-7.9475e-05	0.589393	7.8696e-05	0.227002	1.39067e-05	0.811953	2.05797e-05	0.883731	8.71977e-06	0.813836	-0.00169026	0.183051	-0.0109167	0.694975	0.0145123	0.609911
1401	3190563	ZNF583	0.00419346	0.910417	0.0963453	0.00892062	0.0965868	0.0570099	-0.076486	0.13602	-8.63924e-05	0.690322	2.38174e-05	0.803966	-4.15384e-05	0.636031	5.14532e-05	0.804207	-4.93385e-05	0.368076	0.00120832	0.51914	0.018875	0.644154	0.00420581	0.920525
1402	2640368	MGC52110	-0.137416	0.0200859	-0.179903	0.002514	-0.0783595	0.355023	-0.102208	0.213095	0.00117505	0.000634127	-7.08667e-05	0.642334	-6.4262e-06	0.963607	0.000285727	0.387557	-0.000189786	0.0301027	-0.00346566	0.246864	-0.0274679	0.676106	-0.00826402	0.900637
1403	7000731	ATP10D	-0.0187404	0.545645	-0.0426674	0.154338	-0.0170013	0.679991	-0.0563796	0.17956	0.000113531	0.525134	7.10277e-05	0.373458	-3.08192e-05	0.664982	-0.000252383	0.143563	-1.23673e-05	0.783015	-0.00188991	0.214792	-0.0150525	0.655085	-0.00623961	0.856023
1404	7330408	GULP1	0.0161433	0.581072	-0.012827	0.653267	0.0272447	0.491202	-0.0827081	0.0380444	0.000216098	0.200732	-9.00913e-05	0.231787	-5.83613e-05	0.388592	-0.000376445	0.0209314	-5.91916e-07	0.988909	-8.15445e-05	0.955086	0.0056531	0.859708	-0.0121007	0.709919
1405	7380167	DVL3	0.0191254	0.708549	0.0418949	0.416798	0.0138387	0.849965	0.187251	0.0085538	-9.47689e-05	0.75083	-4.74063e-05	0.718918	9.7217e-05	0.429062	-0.000443519	0.121093	7.28079e-05	0.338057	0.000558802	0.829981	-0.0197885	0.727863	0.0156027	0.787659
1406	5720554	AGL	0.00799877	0.762564	-0.0572438	0.0244096	-0.0186832	0.592795	-0.0475705	0.182894	-0.000155679	0.306988	-8.13927e-05	0.231626	5.89873e-05	0.333851	0.000233001	0.113403	-1.78391e-05	0.641942	0.00162821	0.209235	-0.052489	0.0669281	0.0910067	0.00191371
1407	6980402	AGL	-0.00168577	0.962597	-0.0969	0.00593561	-0.0884427	0.0640651	-0.0202004	0.683728	4.07501e-05	0.846038	-0.0001102	0.234934	0.000243549	0.00274182	-8.13048e-05	0.683971	5.97206e-05	0.252266	-0.00119652	0.504539	-0.0135965	0.729601	0.042438	0.294774
1408	1470450	FST	0.00196358	0.956395	0.0316601	0.363945	-0.000513832	0.991382	-0.0228548	0.640775	-0.000441818	0.0337469	0.000184176	0.0464923	-1.45671e-05	0.859305	-1.62494e-05	0.935118	8.12884e-07	0.987549	0.00056188	0.751777	-0.0890813	0.022542	0.0209067	0.602159
1409	4560722	KRTAP23-1	0.00904555	0.736565	0.0252853	0.334499	-0.0297422	0.404184	-0.0246284	0.504117	-0.000135089	0.387433	-3.06352e-05	0.658691	0.000110458	0.0697893	-0.000109824	0.462453	-1.81611e-05	0.640937	0.000483905	0.716729	-0.0083743	0.775287	-0.010345	0.731108
1410	6520576	IRF1	0.20295	3.4345e-05	0.24468	7.0608e-07	0.275576	8.40427e-05	0.381407	2.05409e-08	-0.000658142	0.0210575	4.93454e-05	0.695665	0.000140252	0.234319	-0.000195795	0.475053	0.000132138	0.0692417	0.00233905	0.346735	-0.0852322	0.117302	0.0904326	0.101866
1411	1980424	TRAPPC6A	-0.0691277	0.0822477	-0.0430486	0.279018	0.0210898	0.708723	-0.0391038	0.475489	0.000238898	0.300737	0.000226919	0.0266411	-0.000215711	0.0248019	-0.000337587	0.129497	-0.000119298	0.0428561	-0.00175345	0.382206	-0.0105986	0.809736	-0.0467497	0.295588
1412	3930528	ARRDC1	-0.0438236	0.321941	-0.0682228	0.117108	-0.0884791	0.144591	-0.0261288	0.665966	0.000231097	0.367036	-3.53752e-05	0.755889	-0.000225056	0.0314824	-0.000435515	0.0775589	-1.45913e-05	0.822363	-1.74956e-05	0.993682	-0.0361682	0.455731	0.022067	0.656059
1413	5900497	WDR19	-0.0487324	0.333479	-0.0133033	0.792541	-0.0898226	0.210939	-0.0618236	0.375356	0.000166038	0.5709	-1.49634e-05	0.90819	-7.89317e-05	0.515028	0.00101724	0.000308442	-0.000167101	0.0252918	-0.00376321	0.140032	0.104076	0.0625786	-0.0216137	0.703106
1414	1450255	NR3C2	-0.0134557	0.764914	0.0318959	0.477167	-0.00736467	0.906175	-0.0503841	0.419375	0.000317026	0.227066	0.000132741	0.25203	-0.00013084	0.217198	0.000239995	0.338731	-0.000109331	0.0996562	-0.00162264	0.476008	0.0314842	0.526482	-0.0117863	0.817218
1415	4670047	NEK10	-0.00654146	0.807552	0.0393852	0.134988	-0.00625844	0.864421	-0.00559679	0.878873	-0.000321046	0.0386118	1.25348e-05	0.856263	9.75708e-05	0.117352	7.54547e-06	0.959813	2.23784e-05	0.567807	0.0014649	0.272107	0.00794422	0.787382	-0.022063	0.460528
1416	2750521	NUP205	0.14965	0.00262619	0.148194	0.00315641	0.0233627	0.743477	0.150874	0.0291328	-9.05769e-05	0.754685	3.875e-05	0.762161	0.000144003	0.230539	0.000540996	0.0520822	-0.000138038	0.0618167	-0.00118351	0.639436	0.0217692	0.693781	0.0212163	0.706054
1417	1090022	CBFA2T3	-0.0357077	0.624733	-0.152376	0.0378666	-0.0204627	0.844796	-0.0778795	0.440791	0.000317561	0.454261	-0.000303844	0.1062	-0.000316472	0.0722043	0.000982887	0.0161951	-0.000282334	0.00910045	-0.00472	0.201348	0.0512869	0.526896	-0.0657454	0.422929
1418	2810600	CBFA2T3	-0.0500477	0.0779718	-0.0411782	0.132311	-0.0862957	0.0214008	-0.00920412	0.810835	-8.24659e-05	0.613954	-0.000103681	0.156317	4.85197e-05	0.450949	0.000119426	0.449585	-9.90181e-05	0.0155107	0.000343424	0.80505	-0.0349262	0.257453	0.0512513	0.103157
1419	2710154	LOC388915	-0.010644	0.748834	-0.0125447	0.700722	0.0374523	0.409167	-0.00787667	0.862604	-9.89165e-05	0.606755	-7.93117e-06	0.92628	-1.94357e-05	0.80018	-0.000256299	0.166798	3.75645e-05	0.438003	-0.00166373	0.313626	-0.0117366	0.747732	0.0311326	0.400015
1420	510082	ASPHD1	0.00165692	0.949641	0.0203274	0.421468	-0.0147057	0.671325	0.0187116	0.59861	5.69153e-05	0.706319	-8.02089e-05	0.235379	4.47663e-05	0.45064	7.16409e-05	0.623512	-2.91328e-05	0.440564	0.000396724	0.757644	0.0576895	0.0430155	-0.0221691	0.445444
1421	1690170	ASPHD1	-0.0146545	0.624734	0.0272323	0.351685	0.0254046	0.522853	0.052563	0.199888	-0.000184787	0.288481	8.65297e-05	0.262299	-2.76265e-05	0.689174	-0.000110011	0.508711	5.09401e-05	0.242977	-0.00219294	0.141319	0.0401578	0.218042	-0.0408045	0.225339
1422	1710441	PSEN1	0.126956	0.0604817	0.210991	0.00192754	0.229485	0.0174146	0.271858	0.00375834	-0.000293771	0.45558	0.000403187	0.0205353	-0.000361138	0.0267195	8.08252e-05	0.830843	-0.000207301	0.0389616	-0.000766264	0.823262	-0.0905648	0.227624	0.0524867	0.492064
1423	7380397	SLC12A8	-0.000151421	0.995776	-0.0394339	0.158353	0.0107559	0.776982	-0.0229641	0.559172	-2.82211e-05	0.865487	-1.85608e-05	0.801384	1.04254e-05	0.872566	-0.000250416	0.115158	5.41236e-05	0.19228	0.00111464	0.433643	-0.0261191	0.402971	0.0329292	0.305638
1424	7150736	POLR3B	0.0994966	0.00471803	0.0521497	0.136687	0.0191761	0.697514	0.0229172	0.636246	0.000138073	0.499184	4.67894e-05	0.605416	-1.2833e-05	0.879205	-6.43755e-05	0.743546	-3.80164e-05	0.465169	-0.0065632	0.000214265	0.0732862	0.0591958	-0.0208799	0.598033
1425	2470326	ZNF272	0.0129777	0.776943	0.0112306	0.804617	-0.0500424	0.433994	-0.0407646	0.516274	-3.92863e-05	0.882278	-3.59629e-05	0.760214	-2.27242e-05	0.835781	0.000128759	0.614988	7.87351e-05	0.243769	-0.00122204	0.594729	0.00490698	0.92252	0.0696353	0.174666
1426	6450743	CD22	-0.147531	0.00160872	-0.0679278	0.147303	-0.123953	0.0623582	-0.160099	0.0132755	0.000185403	0.495082	1.444e-06	0.990439	-0.000321035	0.0042204	0.00127727	1.05208e-06	-8.36633e-05	0.226923	-0.000548406	0.816496	0.106833	0.0393592	0.0316241	0.547046
1427	1010368	MGC62100	0.0506717	0.0729533	0.0111944	0.68405	0.0657735	0.0825421	0.0679764	0.0773314	0.000146667	0.369424	-8.06756e-05	0.267214	8.59154e-06	0.895752	-0.000129319	0.410926	-4.05826e-05	0.324337	0.000431176	0.75799	-0.0259802	0.398711	0.0345186	0.273416
1428	780228	RARB	-0.0398757	0.137516	-0.0513949	0.0477831	0.0234076	0.511732	-0.0630296	0.0837642	0.000233575	0.131084	-0.000115674	0.0945616	-6.85341e-06	0.910489	7.60759e-05	0.61069	-4.70696e-05	0.224405	0.000477406	0.717389	-0.00448871	0.877961	-0.0223595	0.45249
1429	3390201	RARB	-0.0114317	0.704341	0.0188715	0.515671	0.000692578	0.986115	-0.00343454	0.93289	-8.84464e-05	0.610436	7.99528e-05	0.302452	1.89807e-05	0.782661	-0.000300538	0.0728024	-4.60885e-06	0.9157	-0.00126412	0.392393	-0.0155609	0.633973	0.0611139	0.0673374
1430	6420672	RUNX2	-0.039002	0.635505	-0.0312865	0.705828	-0.0708058	0.548305	-0.140035	0.220443	0.000499593	0.296722	0.00010027	0.636889	-0.000166537	0.395556	-0.000414685	0.367664	-0.000289311	0.0175505	-0.0042481	0.307886	0.0408996	0.654977	-0.12139	0.18765
1431	5390273	CTNS	0.000650563	0.984125	-0.0496736	0.120351	-0.0163856	0.705915	-0.0637057	0.156154	-0.000168396	0.376511	8.07157e-05	0.338422	-5.02615e-06	0.946376	-8.84246e-05	0.626464	7.96535e-06	0.866926	0.000730636	0.653876	-0.0062848	0.86015	0.000446992	0.990308
1432	6270397	CTNS	0.0592549	0.210417	-0.0912864	0.054961	0.0222585	0.742597	0.0337953	0.605682	-0.000395599	0.150308	0.000124307	0.307795	-0.000133974	0.240798	-0.000116863	0.659205	6.90504e-05	0.32507	-0.00402641	0.0925888	0.00142673	0.978332	-0.021616	0.68443
1433	1580400	SERP1	-0.0463086	0.232221	-0.0279152	0.466019	-0.0377692	0.472335	-0.0405836	0.447155	0.000106994	0.635457	-0.000255086	0.0106149	0.000106935	0.239903	0.000137563	0.523725	5.20258e-05	0.360988	-0.000714829	0.713899	0.0136598	0.74773	-0.0490766	0.263584
1434	6620017	GPT	-0.00175406	0.956516	-0.0429233	0.170475	-0.0340149	0.425046	-0.00403053	0.927137	-0.000228795	0.220828	-0.000103448	0.212502	9.57515e-05	0.188261	3.91433e-05	0.826737	1.35854e-05	0.770394	0.00360644	0.0236476	-0.026614	0.448208	0.0248452	0.489759
1435	1780672	PELI1	0.520044	2.28547e-05	0.856569	4.92628e-12	0.341531	0.0534291	0.26513	0.120667	-0.00204049	0.00434113	-1.15678e-05	0.97088	0.000356465	0.225167	0.0018426	0.00735144	-2.82665e-05	0.876658	0.0035778	0.565774	0.0139904	0.918488	0.103473	0.452798
1436	3800739	PACRG	0.0712006	0.0283826	0.0464027	0.144509	0.0748533	0.0842511	0.0380814	0.392134	-7.84736e-05	0.677629	-0.000122975	0.141608	-2.96015e-06	0.968705	0.000830506	4.23785e-06	-9.57803e-05	0.0435364	0.000283273	0.861278	0.0373452	0.291349	0.00834773	0.819384
1437	1580309	NXF1	0.0776777	0.051356	0.141966	0.000406995	0.0832511	0.142873	0.0623282	0.260669	-0.000418731	0.0715995	0.000305763	0.00287379	-0.000270428	0.00486223	-0.000409388	0.0662894	-9.06603e-06	0.87835	-0.00290814	0.151376	0.0206553	0.640758	0.0596673	0.186975
1438	990722	CENPJ	-0.00742731	0.832751	-0.0618917	0.0735061	-0.170072	0.000304498	-0.0405772	0.401121	-4.44802e-05	0.828022	-0.000124362	0.169958	0.00013364	0.103502	0.000214667	0.272261	8.53625e-05	0.097498	-0.000345773	0.844567	0.0533419	0.164613	0.01837	0.64424
1439	1570348	STMN1	0.0159835	0.680449	-0.0559619	0.150248	0.0334249	0.540831	-0.0990799	0.0657177	0.000343041	0.129348	6.56216e-05	0.51116	0.000102297	0.270199	0.000132279	0.541632	-0.000105171	0.0675002	-0.000678431	0.730452	-0.0227367	0.596777	0.0361424	0.411492
1440	5220239	STMN1	-0.00979221	0.852386	-0.0830173	0.11832	-0.0575721	0.446834	-0.0969084	0.185819	0.000485449	0.113613	-0.000127875	0.345661	0.000166035	0.189463	-0.000289735	0.325418	-6.10176e-05	0.434852	0.00196881	0.461325	0.00423228	0.942368	0.019268	0.745461
1441	6980524	PKM2	0.0222934	0.671496	-0.0109291	0.836556	-0.0180949	0.80895	0.0706736	0.334027	0.000219862	0.473547	-0.000134114	0.321404	-3.56038e-05	0.778308	-0.0003886	0.185988	3.53045e-05	0.651325	0.000672119	0.801751	-0.00535142	0.926971	-0.0102224	0.86421
1442	6590113	NUDT11	-0.0577305	0.438148	-0.0413927	0.579652	-0.168645	0.112672	-0.0946758	0.357616	0.000252436	0.559559	-0.000158335	0.409105	4.62338e-05	0.796693	-0.000123644	0.766761	0.000123132	0.264445	-0.00270651	0.47215	-0.040569	0.623327	0.0579006	0.488783
1443	4060273	MESDC2	-0.00334894	0.910561	-0.0473862	0.106264	-0.00887764	0.828516	0.0316119	0.438247	0.000385587	0.025334	-0.000100672	0.189678	0.000102726	0.142354	-7.53363e-05	0.650625	3.76261e-05	0.38895	0.00106098	0.47508	0.00666326	0.838674	-0.00665283	0.841437
1444	50386	ACYP1	-0.0474117	0.274698	-0.151278	0.000357156	-0.0885326	0.125601	-0.236697	7.12766e-05	0.000336079	0.182978	5.49217e-05	0.623747	1.8731e-06	0.984821	-0.00059274	0.0140461	2.38966e-05	0.704131	0.000113513	0.958007	-0.026349	0.57851	0.0669279	0.168563
1445	2810154	ACYP1	-0.160461	0.0481019	-0.153736	0.0599014	-0.190549	0.100995	-0.352122	0.0017799	0.000803972	0.0886841	0.000437871	0.0366628	-0.000470329	0.0149656	-0.000133995	0.767953	-0.000116794	0.330975	-0.00275422	0.502586	0.0065401	0.94224	0.0152586	0.866686
1446	1030709	IFNG	0.0578994	0.79063	0.823834	0.000182234	-0.0613907	0.845006	0.242398	0.423951	-0.00139901	0.270495	0.000378658	0.501148	-9.25487e-05	0.859203	0.000487666	0.689516	0.000610297	0.0591102	0.0174169	0.115277	0.159957	0.510032	0.262884	0.282218
1447	5260575	DSU	0.0456882	0.119258	-0.00649177	0.821403	0.0542386	0.175952	-0.0264633	0.508525	0.000375559	0.0266934	-1.43164e-05	0.849561	-6.27933e-05	0.361076	0.000194213	0.235049	-7.05975e-05	0.0998602	0.000551317	0.705275	-0.050379	0.116847	0.086796	0.0079197
1448	290484	PKP4	-0.11509	0.0627642	-0.181378	0.00346466	-0.170773	0.0528879	-0.226463	0.00806643	0.000493304	0.169793	5.30268e-05	0.7393	-0.000226652	0.127787	7.45113e-05	0.829578	-0.000116626	0.203003	0.00388895	0.213471	-0.0745652	0.277067	-0.00791284	0.909277
1449	1400142	PKP4	-0.0289667	0.382713	-0.0566535	0.0799784	-0.0104022	0.816145	-0.0386234	0.393434	0.000230745	0.22832	1.60614e-05	0.851062	-7.53066e-05	0.322058	-0.000224834	0.223956	4.11821e-05	0.392276	0.000362294	0.825154	0.0418238	0.249143	-0.0342063	0.353432
1450	6960612	AQP8	-0.0370362	0.412369	0.0586318	0.195309	0.0769062	0.231966	0.0674503	0.279533	8.05166e-05	0.758953	2.97234e-05	0.798372	0.000159545	0.142885	-0.000181064	0.474024	-2.09528e-05	0.754208	-0.00122243	0.592195	-0.0411451	0.411273	-0.014866	0.76956
1451	2650039	GNA12	0.000675654	0.985199	0.0357336	0.322236	0.00837567	0.869223	-0.0478727	0.33767	-0.000150016	0.476956	1.10285e-05	0.906285	-1.98993e-05	0.819503	0.00015061	0.459334	7.77038e-05	0.147996	0.00159447	0.382692	0.0246396	0.539059	-0.044174	0.278858
1452	5090491	TFR2	0.00507864	0.868018	0.0345764	0.244317	0.00656357	0.871239	0.0289088	0.487903	-2.36874e-05	0.893622	2.52624e-05	0.748224	2.36165e-05	0.736857	2.56358e-05	0.880028	2.61721e-05	0.555631	-0.000246685	0.870535	0.0375415	0.258354	-0.0270016	0.429404
1453	2030576	CDH11	0.0299431	0.315392	0.0262004	0.364756	0.0528518	0.181049	0.0304281	0.454165	0.000206298	0.2318	-2.65102e-05	0.730251	6.3884e-06	0.924625	-1.7906e-05	0.914033	-3.48767e-05	0.41809	0.00144925	0.324316	-0.0199865	0.538337	-0.0159604	0.630558
1454	6980296	DCN	-0.0288438	0.414972	0.00651162	0.851635	-0.00251323	0.958416	0.0272031	0.576138	-1.13055e-06	0.995607	-8.9011e-05	0.329256	-4.54228e-05	0.57733	0.000361125	0.0669749	-3.20687e-05	0.534479	-0.000224783	0.898643	0.0262861	0.498811	-0.0605583	0.12576
1455	3120746	AHNAK	-0.152236	0.008763	-0.1091	0.0629584	-0.141884	0.0893036	-0.137435	0.0891498	-3.75793e-05	0.911659	-0.000316871	0.0341612	0.000129245	0.355423	-1.02859e-05	0.974768	0.000123701	0.15157	0.0117406	6.9162e-05	-0.0935378	0.147622	-0.0817923	0.212477
1456	6280086	AHNAK	-0.131333	0.0330125	-0.0684677	0.270613	-0.0377158	0.668696	-0.00832931	0.922605	-0.000129665	0.718204	-0.000267069	0.0920869	0.00011166	0.451716	-6.15588e-05	0.858211	0.000113862	0.213573	0.0102884	0.00102715	-0.106588	0.119521	-0.0792771	0.256207
1457	380307	ACTR3	0.172383	0.0346725	0.111092	0.173128	-0.0164505	0.884573	0.0860543	0.446883	-0.000552334	0.246026	-3.34628e-05	0.873446	0.000306724	0.114354	0.000136566	0.764128	0.000229405	0.0575235	-0.000219484	0.95775	0.0815859	0.365318	0.0744407	0.423839
1458	1050711	NUP153	0.0201147	0.694373	0.122861	0.0172003	-0.0138289	0.850959	0.0518397	0.464996	-0.000267608	0.368799	-4.03023e-05	0.759987	0.000189886	0.124281	0.00036337	0.205257	-6.91654e-05	0.362561	0.00177025	0.494684	0.00732693	0.897541	0.0744855	0.195766
1459	3440678	CIB1	0.0453526	0.333256	0.12127	0.0104018	0.113724	0.0902817	0.137662	0.0349968	-0.000265151	0.33243	6.57601e-05	0.58569	0.000150786	0.181657	2.34486e-05	0.928737	1.21541e-05	0.861502	0.00637312	0.00756779	-0.0318313	0.54135	0.0782614	0.141027
1460	7040020	PSMB8	-0.00770647	0.831604	-0.0919995	0.0117289	-0.0438991	0.392941	-0.0916576	0.0691716	0.000112982	0.593357	5.23758e-05	0.574265	-4.35318e-05	0.617641	-0.000287716	0.155342	6.35642e-05	0.23801	0.00118353	0.521795	0.00651628	0.87133	0.0305246	0.460505
1461	6900487	SEMG2	0.00227215	0.934914	0.0680749	0.0111087	-0.0714972	0.051724	0.0409569	0.277051	-0.000132323	0.408788	5.53785e-06	0.938407	1.58295e-05	0.801857	-2.05769e-05	0.894232	7.21759e-06	0.857132	0.000357176	0.793343	0.0128602	0.670436	-0.0604136	0.0499349
1462	5670437	TSR1	0.176641	0.000463923	0.105524	0.0381597	0.151303	0.0365112	0.183769	0.0088941	-0.000101817	0.7293	0.000110875	0.3939	7.24602e-05	0.548515	0.000723535	0.0103438	-0.000134908	0.0716125	-0.00490084	0.0559557	-0.0127066	0.820902	0.094991	0.0948118
1463	5360364	TA-PP2C	-0.0447874	0.22819	-0.042293	0.258177	-0.0841021	0.113593	-0.0547235	0.288723	-0.000184482	0.393819	7.41986e-05	0.438452	-4.18061e-05	0.639286	0.000298349	0.151316	-2.66041e-05	0.629373	0.0019392	0.303418	-0.0279537	0.498405	0.016759	0.688678
1464	2760576	KIF23	0.0199806	0.52935	-0.0190927	0.544688	-0.0216512	0.620004	0.0162094	0.712888	0.000332182	0.0730963	-0.000172063	0.0356541	0.000124778	0.0893258	-1.96554e-05	0.911531	-3.85584e-05	0.407918	0.000835981	0.601095	0.0220286	0.529675	-0.00446918	0.900698
1465	520646	BLVRB	-0.0486909	0.300011	-0.11765	0.0129078	0.0992482	0.136791	-0.0343226	0.600206	0.000177899	0.51692	-7.46076e-05	0.537268	-5.82304e-05	0.604051	-0.000668878	0.0107892	-1.61416e-05	0.817012	-0.00498324	0.0374358	0.0371499	0.476675	-0.0763734	0.153202
1466	270608	FOXF1	0.0151452	0.635489	-0.0264581	0.388805	-0.0086547	0.837366	-0.00259407	0.952022	0.000167514	0.362375	5.46675e-05	0.50564	-9.11972e-05	0.215143	-0.000172571	0.331277	8.06635e-05	0.0813417	-0.00124314	0.426961	0.0283474	0.412381	-0.0339543	0.337342
1467	3390064	ZFP37	0.106895	0.0469097	0.0371804	0.491857	-0.0328846	0.667465	0.174357	0.0194608	-0.000357131	0.254268	-6.37553e-05	0.64502	0.000358684	0.00569748	0.000343418	0.253689	0.000144344	0.0708057	0.00755216	0.00567824	-0.0378645	0.525706	0.0348049	0.567745
1468	3420435	NXPH2	0.00573885	0.831398	-0.0160091	0.543303	-0.0212493	0.552654	0.0046559	0.899824	0.000132275	0.399059	-0.000106951	0.12381	0.000107674	0.0810253	-0.000186279	0.21362	1.40335e-06	0.971437	0.00168199	0.210142	0.0288576	0.326079	-0.0185503	0.540441
1469	1450349	KCNG2	0.0820244	0.00829257	0.0493512	0.109298	-0.0117897	0.781807	0.0119138	0.782183	-5.16996e-05	0.775654	-0.000124138	0.121202	0.000136016	0.058258	0.000235167	0.173958	-5.12622e-05	0.260606	0.00139971	0.371082	-0.0507913	0.138227	0.0347525	0.322363
1470	1400193	KIAA1754L	0.0373014	0.384497	-0.00312025	0.941425	-0.0114398	0.847182	0.0935378	0.112915	-0.000164268	0.50917	-1.96373e-05	0.85892	0.000213513	0.0342991	-0.000471439	0.0488577	0.000137458	0.0291788	0.00936385	1.3269e-05	0.00901038	0.848697	-0.041909	0.383082
1471	6860139	KIAA1754L	-0.013236	0.648877	0.00661514	0.817619	-0.036939	0.348195	-0.0165666	0.678979	-5.06405e-05	0.764763	-0.00011062	0.139577	6.34407e-05	0.350723	0.000206081	0.202736	-2.6774e-05	0.530212	0.00139124	0.340681	0.0204987	0.519815	-0.0119824	0.715429
1472	2940053	OR1E1	0.00395594	0.891966	-0.0291844	0.298519	-0.0169348	0.659839	-0.0810061	0.0400882	1.90384e-06	0.990942	6.85526e-06	0.927212	-6.27559e-06	0.92416	-1.10853e-05	0.945456	3.83372e-05	0.36074	-2.14201e-05	0.988027	0.00207393	0.947751	0.00533378	0.868669
1473	5090634	PCDHGA8	0.0133149	0.596435	-0.00782522	0.749301	-0.0389391	0.242751	-0.0960579	0.00531933	0.000152661	0.296123	-5.88883e-05	0.363912	7.51672e-05	0.186342	6.07402e-06	0.965337	-1.15236e-05	0.751495	0.0018624	0.135093	-0.00423309	0.877373	-0.00730889	0.794995
1474	3180661	C19orf12	0.00965292	0.779008	-0.0406226	0.234766	0.0669117	0.165949	0.055854	0.236932	-6.6263e-05	0.739591	7.33496e-05	0.407142	0.000134246	0.104423	-0.000531103	0.00576141	9.87136e-05	0.0520414	0.00257437	0.136424	-0.130707	0.000571709	-0.0295906	0.443012
1475	1780647	TRIM56	0.214975	8.02048e-05	0.0805383	0.143099	0.118677	0.127275	0.207637	0.00621086	-0.000149779	0.637742	0.000329721	0.0187092	-3.32838e-05	0.80018	-9.21238e-05	0.762495	2.24916e-06	0.977861	-0.00452535	0.103107	-0.081342	0.179273	0.0838434	0.176224
1476	4920687	CXXC4	0.0529049	0.17512	-0.0209931	0.592102	-0.00350015	0.949528	0.0512223	0.344692	-0.000238807	0.293743	-0.000114455	0.254607	9.72608e-05	0.296351	0.00028654	0.188643	0.000275575	1.89169e-06	0.00454341	0.0217761	-0.0710427	0.100734	0.0281873	0.522858
1477	5290270	KRTAP2-4	-0.00295464	0.930662	-0.0242221	0.464046	-0.0298154	0.507824	-0.0395802	0.395308	0.000166717	0.398316	-8.70832e-05	0.320139	-7.28874e-05	0.342691	4.3225e-05	0.818866	-3.92619e-05	0.424414	-0.000203683	0.903715	-0.0443284	0.23158	0.0221671	0.559693
1478	6450129	SCAND2	0.0872563	0.0848872	-0.00718573	0.887211	0.031021	0.66523	-0.0413456	0.554751	0.000460239	0.117586	-8.95478e-05	0.492964	5.74037e-05	0.633108	0.000163525	0.563549	-5.60865e-05	0.453026	-0.000803737	0.752855	-0.0272575	0.627182	0.0517255	0.361399
1479	6180253	ZNF570	0.0978069	0.0356435	0.107335	0.021325	0.0457645	0.489575	0.112433	0.0800937	-0.000418714	0.121391	-1.51925e-05	0.899151	0.000146469	0.191747	0.000234407	0.368333	9.79055e-05	0.155578	0.00239551	0.308162	-0.00322304	0.950175	0.00827242	0.874283
1480	5080468	CSTL1	-0.0389645	0.125815	0.00255576	0.917032	0.0823345	0.0143393	-0.00257346	0.940518	1.06401e-05	0.942122	-6.52128e-07	0.992066	1.08609e-05	0.850381	-0.000177257	0.210632	-6.96191e-06	0.84934	0.000755766	0.544594	0.00574664	0.835417	-0.0317186	0.260498
1481	510692	KRTHA3A	-0.0385517	0.138389	-0.00908917	0.718664	-0.016164	0.638825	-0.0218817	0.537605	-0.000325458	0.0307407	3.27606e-05	0.625273	8.6285e-05	0.14263	-0.000136018	0.347098	-2.82235e-05	0.452603	-8.02644e-05	0.950145	-0.0221814	0.433744	-0.00494582	0.864478
1482	940592	SLC30A6	0.0880087	0.00232283	0.0383629	0.173943	0.0453151	0.237433	0.0976528	0.0134881	-0.000139623	0.405572	-5.83472e-05	0.433121	1.85556e-05	0.781718	0.000279355	0.0818804	7.75718e-05	0.0657191	0.00120805	0.401283	0.00319987	0.918891	-0.00830456	0.798236
1483	780377	RAET1L	-0.0245955	0.50448	0.0655071	0.0755056	0.00598831	0.90869	0.101862	0.0452494	-0.000417076	0.0512409	0.000116201	0.221109	-6.18687e-05	0.48229	-4.3829e-05	0.83158	9.10705e-05	0.0944552	-0.000432449	0.815982	0.00252149	0.950741	0.0268749	0.51517
1484	5050500	C19orf23	-0.00117	0.966929	-0.0343552	0.213116	-0.0238502	0.524402	-0.0070255	0.856487	-0.000215309	0.190599	6.4423e-05	0.376334	6.14522e-05	0.335703	-0.000234839	0.134267	2.64183e-06	0.948518	-0.000192048	0.891251	-0.0332461	0.281145	0.00141411	0.96444
1485	5810026	ZNF271	-0.0182802	0.768338	-0.120167	0.0534532	-0.233901	0.00814776	-0.245032	0.00427048	-0.00014596	0.685574	-9.87144e-05	0.537008	3.25049e-05	0.827492	0.000441032	0.204134	-6.82861e-05	0.457401	-0.00228388	0.466368	-0.0175392	0.798828	0.0397859	0.567871
1486	3610129	ADAMTS18	0.0274832	0.382393	0.0460836	0.13545	-0.00129037	0.976087	0.0344911	0.421907	9.4452e-05	0.60347	-8.93712e-05	0.269675	-5.96502e-05	0.41954	2.64763e-05	0.880077	2.39105e-05	0.60366	0.00123244	0.430894	0.0422694	0.22014	-0.018462	0.598668
1487	2650504	ZNF155	0.00488368	0.87358	0.00924965	0.760254	-0.0186691	0.658487	0.0335179	0.426168	8.78908e-05	0.621467	-0.00012194	0.12254	8.79334e-05	0.22586	-5.70744e-05	0.738833	5.8513e-05	0.194962	0.00291843	0.0577203	0.00411153	0.902903	-0.0275333	0.424268
1488	1260427	FRMD3	0.0690188	0.6397	-0.105685	0.477383	-0.0785718	0.711035	-0.312515	0.127129	-0.000342644	0.689695	-0.000714621	0.0603869	0.000180292	0.609284	0.000698078	0.397543	6.75003e-05	0.757455	0.0119223	0.110724	-0.0119805	0.941803	0.00497682	0.975975
1489	150154	H2AFY	-0.109105	0.0124348	-0.0985971	0.0251853	-0.103247	0.0977202	-0.090393	0.137551	-0.000144362	0.571289	-5.69421e-05	0.612356	-0.000173774	0.0966333	-0.000166399	0.495143	-3.74801e-05	0.563289	-0.00291514	0.190084	-0.0534475	0.270876	-0.0100867	0.838727
1490	5080364	H2AFY	-0.0190395	0.501504	-0.0248822	0.367317	-0.0268672	0.481614	-0.0445068	0.248602	0.000165163	0.312618	-3.31839e-05	0.6491	0.000110535	0.0916716	-0.000454157	0.00399786	4.9514e-06	0.904388	0.000319874	0.819407	-0.0118335	0.701995	0.00647009	0.83732
1491	6900360	DKFZP434B0335	0.155895	0.0175283	0.217873	0.000952887	0.11599	0.216983	0.219906	0.0153788	0.000439982	0.248671	0.000392821	0.0201195	-0.00034314	0.0305638	0.000429196	0.243009	-0.000255275	0.00872758	-0.0067809	0.0410857	0.0717344	0.32468	-0.00453924	0.950959
1492	60605	TTLL12	-0.0781768	0.13281	-0.0518967	0.321864	-0.0987377	0.184137	-0.0518837	0.472768	0.000147628	0.626125	0.000249691	0.0622242	-0.000319055	0.0107596	-0.000497771	0.0870846	-5.87499e-05	0.446788	-0.00312224	0.237113	0.0436508	0.449944	-0.0700617	0.233085
1493	360253	ARHGAP6	-0.0126835	0.676277	0.00816862	0.780892	0.0377733	0.348976	-0.00762376	0.853032	-6.17087e-05	0.724847	-1.93655e-05	0.804135	-1.50265e-05	0.83125	-9.14721e-05	0.588118	1.57239e-05	0.722012	-0.000739705	0.621183	0.00719853	0.827016	0.000789808	0.981352
1494	1820470	RASSF1	0.0699568	0.078016	0.0977748	0.013737	0.151522	0.00705487	0.0532639	0.330372	0.000142999	0.534892	-0.000113888	0.264863	0.000134788	0.159133	-0.000205275	0.355384	0.000144804	0.0137697	0.00446646	0.0257682	0.0655054	0.135834	-0.00119042	0.978722
1495	3370121	FANCD2	0.0643261	0.187285	0.110104	0.0242494	0.107042	0.117211	0.0931065	0.171362	-0.000139096	0.625993	0.000117069	0.351693	-3.24168e-05	0.776145	0.000898817	0.0009444	-0.000107964	0.133931	-0.00330765	0.181742	-0.00874877	0.871612	0.0339946	0.538987
[truncated: 20,682 more rows]
