# Supplementary material for: Characterization of Changes in Gene Expression and Biochemical Pathways at Low Levels of Benzene Exposure
Source: PLoS One. 2014 May 1;9(5):e91828. doi: 10.1371/journal.pone.0091828 (PMC4006721; doi:10.1371/journal.pone.0091828)
Supplement: Table S4 — Median and 95% confidence interval (CI) estimates of the rate of change of marginal effect of benzene exposure below 1 ppm ( / – see equations (10 ) and (13)) and above 1 ppm ( / - see equations (11 ) and (14)) and the change in absolute rate of change of the marginal effects from below 1 ppm to above 1 ppm ( / – see equations (12 ) and (15)) for the first two principal components of the for the B-cell receptor signaling, Toll-like receptor signaling, Steroid hormone synthesis and Maturity onset of diabetes pathways. (XLSX) [file pone.0091828.s007.xlsx]

## Sheet: Sheet1
	Bi,1		Bi,2		Di
Pathway	Median	95% CI	Median	95% CI	Median	95% CI
Steroid Hormone Synthesis: Principal Component 1	0.231	(-0.059, 0.340)	0.005	(-0.007, 0.015)	0.224	(0.006, 0.338)
Steroid Hormone Synthesis: Principal Component 2	0.145	(-0.324, 0.346)	-0.014	(-0.031, 0.014)	0.164	(-0.003, 0.352)
Toll-like receptor signaling: Principal Component 1	0.178	(-0.345, 0.378)	0	(-0.016, 0.014)	0.237	(0.005, 0.378)
Toll-like receptor signaling: Principal Component 2	0.03	(-0.385, 0.358)	-0.004	(-0.029, 0.025)	0.159	(-0.001, 0.383)
B-cell signaling: Principal Component 1	0.278	(-0.07, 0.341)	0.001	(-0.005, 0.009)	0.276	(0.013, 0.339)
B-cell signaling: Principal Component 2	0.115	(-0.203, 0.358)	-0.007	(-0.028, 0.015)	0.139	(-0.001, 0.347)
Maturity-onset diabetes: Principal Component 1	0.311	(-0.001, 0.366)	-0.001	(-0.001,0.001)	0.309	(0.013, 0.363)
Maturity-onset diabetes: Principal Component 2	0.046	(-0.289, 0.323)	-0.015	(-0.032, 0.014)	0.088	(-0.01, 0.331)
